# Supplementary material for: TMT-Based Quantitative Proteomic Analysis Reveals the Physiological Regulatory Networks of Embryo Dehydration Protection in Lotus (Nelumbo nucifera)
Source: Front Plant Sci. 2021 Dec 17;12:792057. doi: 10.3389/fpls.2021.792057 (PMC8718645; doi:10.3389/fpls.2021.792057)
Supplement: Supplementary Table 1 — Detailed quantitative information of identified proteins from lotus embryo during seed dehydration maturity. [file Table_1.xlsx]

## Sheet: Proteins
Supplementary Table 1. Detailed quantitative information of identified proteins from lotus embryo during seed dehydration maturity
Accession	Description	Coverage [%]	# Peptides	# PSMs	# Unique Peptides	# AAs	MW [kDa]	calc. pI	Score Sequest HT: Sequest HT	Abundances (Grouped): F1, 126	Abundances (Grouped): F1, 127N	Abundances (Grouped): F1, 127C	Abundances (Grouped): F1, 128N	Abundances (Grouped): F1, 128C	Abundances (Grouped): F1, 129N	Abundances (Grouped): F1, 129C	Abundances (Grouped): F1, 130N	Abundances (Grouped): F1, 130C	Abundances (Grouped): F1, 131
A0A1U8Q2S7	uncharacterized protein PFB0145c-like OS=Nelumbo nucifera OX=4432 GN=LOC109114540 PE=4 SV=1	79	84	318	84	895	101.4	4.77	812.81	58.4	58.8	59.1	118.4	117.2	117.5	128.7	125.7	122.3	94
A0A1U8BNR3	seed biotin-containing protein SBP65 OS=Nelumbo nucifera OX=4432 GN=LOC104613094 PE=4 SV=1	86	81	396	81	863	91.2	5.49	1078.51	53.8	53.7	54.5	116.6	116.1	115.3	134.5	132.1	130.5	92.9
A0A1U8BAB3	enolase 1-like OS=Nelumbo nucifera OX=4432 GN=LOC104612508 PE=3 SV=1	79	33	539	14	445	47.9	5.99	1385.93	91.7	91.3	93.9	102	99.7	100.2	107.3	106.8	108.5	98.6
A0A1U7Z901	enolase 1 OS=Nelumbo nucifera OX=4432 GN=LOC104587589 PE=3 SV=1	72	31	858	13	444	47.9	5.86	2275.93	95.5	95.9	96.6	99.3	98.6	99.9	104.5	104.3	105.8	99.6
A0A1U8BB13	heat shock 70 kDa protein OS=Nelumbo nucifera OX=4432 GN=LOC104609134 PE=3 SV=1	58	42	212	18	648	71.2	5.53	559	78	76.9	78.5	113.7	113.8	114.5	110.9	109.5	107.9	96.3
A0A1U8B660	Poly [ADP-ribose] polymerase OS=Nelumbo nucifera OX=4432 GN=LOC104607697 PE=4 SV=1	59	47	210	47	814	91.8	6.21	590.7	55	56.5	55.8	118.5	117.3	118.7	129.9	127	126.1	95
A0A1U7ZIF9	heat shock cognate protein 80-like OS=Nelumbo nucifera OX=4432 GN=LOC104594303 PE=3 SV=1	61	52	208	16	699	79.9	5.1	469.47	118.8	116.5	118.7	95.2	93.9	94.3	87.7	88.3	86.6	100
A0A1U8A6M6	myosin-1B isoform X1 OS=Nelumbo nucifera OX=4432 GN=LOC104599684 PE=4 SV=1	56	78	108	77	1586	179.9	4.82	289.54	141.4	143.7	140.8	81.5	81.7	81.2	73.7	75.1	75.5	105.4
A0A1U7ZG72	heat shock cognate protein 80 OS=Nelumbo nucifera OX=4432 GN=LOC104589805 PE=3 SV=1	59	51	209	17	699	79.9	5.07	487.9	121.1	120.7	123.3	92	91.1	90.5	86.3	86.9	86.9	101.2
A0A1U7Z3V9	endoplasmin homolog OS=Nelumbo nucifera OX=4432 GN=LOC104590041 PE=3 SV=1	52	45	159	43	821	93.7	5.01	397.65	106.9	104.9	108.1	99.5	98.2	98.6	95.4	95.4	94.2	98.8
A0A1U7ZVY9	heat shock cognate 70 kDa protein 2-like OS=Nelumbo nucifera OX=4432 GN=LOC104594575 PE=3 SV=1	59	41	157	4	648	70.9	5.29	438.14	132.6	134.2	134.6	86.2	84.9	85.7	80.1	79.6	80.4	101.7
A0A1U7ZN79	heat shock cognate 70 kDa protein 2 OS=Nelumbo nucifera OX=4432 GN=LOC104594564 PE=3 SV=1	59	40	160	3	648	70.9	5.29	447.15	119.2	119.1	124.4	90.6	91.9	94.6	87	86.2	85.9	101.1
A0A1U8BGW9	11S globulin subunit beta-like OS=Nelumbo nucifera OX=4432 GN=LOC104613351 PE=4 SV=1	66	33	317	30	645	73.2	6.3	868.67	87	88.1	86.8	95.3	94.2	93.4	118.2	117.6	122.4	97
A0A1U8BE30	Fructose-bisphosphate aldolase OS=Nelumbo nucifera OX=4432 GN=LOC104612484 PE=3 SV=1	79	23	217	13	358	38.5	8.19	633.1	93.9	93.6	95.5	103.8	102.2	103.1	103.7	103.7	102	98.3
A0A1U8B8J3	Phosphoglycerate kinase OS=Nelumbo nucifera OX=4432 GN=LOC104610834 PE=3 SV=1	72	27	233	15	402	42.7	6.23	633.85	85.5	84.1	87.7	106.2	104.6	105.4	109.8	109.6	110.1	97
A0A1U8B8G7	elongation factor 2 OS=Nelumbo nucifera OX=4432 GN=LOC104608105 PE=4 SV=1	51	43	135	5	843	94.2	6.34	335.64	106.3	105.8	108.5	101.1	98	98.2	94.6	94.1	94.3	99.1
A0A1U8B7P3	elongation factor 2 OS=Nelumbo nucifera OX=4432 GN=LOC104608102 PE=4 SV=1	53	43	135	5	843	94	6.34	330.86	107.5	108.8	107.6	97.6	96.2	92.5	97.5	100.5	93.1	98.5
A0A1U8AG04	Clathrin heavy chain OS=Nelumbo nucifera OX=4432 GN=LOC104602563 PE=3 SV=1	36	58	107	13	1705	193.2	5.49	279.3	123.5	121.7	121.5	90.7	91.5	90.2	85	87.1	86.6	102.3
A0A1U7ZYQ2	Clathrin heavy chain OS=Nelumbo nucifera OX=4432 GN=LOC104594936 PE=3 SV=1	36	57	108	12	1700	192.6	5.49	283.89	117.4	120.1	116.2	91.8	92.1	94.3	89	89.1	87.3	102.9
A0A1U8Q3I0	vicilin-like antimicrobial peptides 2-2 OS=Nelumbo nucifera OX=4432 GN=LOC104596674 PE=4 SV=1	67	27	563	23	470	53.6	7.11	1373.01	64.4	64.7	64.2	109.9	107.4	108.5	127.5	126.6	130.8	96
A0A1U7Z848	ruBisCO large subunit-binding protein subunit beta, chloroplastic OS=Nelumbo nucifera OX=4432 GN=LOC104592091 PE=3 SV=1	57	39	119	8	609	64.6	5.88	321.03	118	115.7	117	97.7	97.1	97.6	85.4	85.9	84.1	101.5
A0A1U8BC41	enolase-like OS=Nelumbo nucifera OX=4432 GN=LOC104611838 PE=3 SV=1	56	23	222	10	445	47.9	6.89	644.48	105.2	100.4	107.6	94.2	91.5	94.2	103.5	101.2	103.4	98.7
A0A1U7Z625	embryonic protein DC-8-like OS=Nelumbo nucifera OX=4432 GN=LOC104590743 PE=4 SV=1	66	35	168	30	435	46.4	6.37	485.99	49.9	50.4	50.9	121	117.5	118.4	133.4	131.2	133.5	93.9
A0A1U8AMM9	chaperonin CPN60-2, mitochondrial OS=Nelumbo nucifera OX=4432 GN=LOC104602123 PE=3 SV=1	60	36	134	12	575	61.2	6.04	341.18	97.2	100.3	98.4	104.4	103	102.9	96.9	98.6	100.5	97.8
A0A1U8A0C6	Alpha-1,4 glucan phosphorylase OS=Nelumbo nucifera OX=4432 GN=LOC104597988 PE=3 SV=1	50	44	117	44	974	110.4	5.68	289.98	88.5	89	89.1	110.3	111.4	109.2	100.6	100.7	101.1	100.1
A0A1U8AUK4	luminal-binding protein 5 OS=Nelumbo nucifera OX=4432 GN=LOC104604061 PE=3 SV=1	53	39	144	27	666	73.4	5.27	390.16	97	93.3	96.8	102.7	101.8	100.8	103.8	103.7	102.1	98
A0A1U7ZJ78	ruBisCO large subunit-binding protein subunit beta, chloroplastic-like OS=Nelumbo nucifera OX=4432 GN=LOC104595121 PE=3 SV=1	54	36	99	5	608	64.4	5.58	277.71	128.7	115.5	117.1	98.2	98.9	93.8	78.6	84.9	83.5	100.8
A0A1U7Z981	chaperonin CPN60-2, mitochondrial-like OS=Nelumbo nucifera OX=4432 GN=LOC104587652 PE=3 SV=1	60	35	129	12	574	61.1	6.04	313.97	96.7	94.3	98.4	103.7	102	103.9	101	101.4	101	97.6
A0A1U7ZJT0	cell division cycle protein 48 homolog isoform X1 OS=Nelumbo nucifera OX=4432 GN=LOC104591448 PE=4 SV=1	64	44	104	18	818	90.9	5.31	265.54	101.2	103.6	101	103.1	102.7	102.9	96.5	95.6	95.4	97.9
A0A1U8A5T1	uncharacterized protein LOC104599429 OS=Nelumbo nucifera OX=4432 GN=LOC104599429 PE=4 SV=1	62	22	173	22	347	37.4	6.44	431.39	72.1	70.5	72.3	113.5	111.5	111.8	118.5	117.5	116.8	95.5
A0A1U7ZLT4	Glyceraldehyde-3-phosphate dehydrogenase OS=Nelumbo nucifera OX=4432 GN=LOC104591636 PE=3 SV=1	72	24	432	10	337	36.5	7.94	1071.81	82.4	81.9	82.8	110.9	105.4	108.7	109.3	109.6	110.8	98.4
A0A1U8A570	glutelin type-B 5-like OS=Nelumbo nucifera OX=4432 GN=LOC104600874 PE=4 SV=1	53	21	278	15	473	54	6.89	730.07	96.2	96.4	97.2	89.9	90.3	89.5	115.1	113.8	113.6	98
A0A1U7Z6F9	5-methyltetrahydropteroyltriglutamate-- homocysteine methyltransferase-like OS=Nelumbo nucifera OX=4432 GN=LOC104590884 PE=3 SV=1	45	31	158	13	765	84.6	6.47	389.01	115.6	114.1	115.7	93.2	93.1	94.3	91.2	91.6	91	100.2
A0A1U8A1B2	tripeptidyl-peptidase 2 OS=Nelumbo nucifera OX=4432 GN=LOC104596074 PE=4 SV=1	39	48	83	48	1361	150	6.54	202.66	95.6	96.4	95.7	100.3	102.8	101.7	103.7	101.9	102	99.9
A0A1U7YV03	embryonic protein DC-8-like OS=Nelumbo nucifera OX=4432 GN=LOC104587251 PE=4 SV=1	70	38	146	33	544	60.7	5.71	349.26	54.9	54.1	55	116.7	114.1	113.7	134.3	131	134.3	91.9
A0A1U8A468	late embryogenesis abundant protein D-34-like OS=Nelumbo nucifera OX=4432 GN=LOC104596545 PE=4 SV=1	80	13	152	13	276	28.7	4.92	427.52	64	61.5	63.3	115.7	115.2	116	124.2	123.5	120.5	96.1
A0A1U7YVE9	Pyruvate kinase OS=Nelumbo nucifera OX=4432 GN=LOC104587381 PE=3 SV=1	64	30	137	11	527	57.8	7.21	351.89	92.5	91.2	92.1	106.7	105.6	106.3	102.7	102.6	101.8	98.6
A0A1U7ZRW8	vicilin-like antimicrobial peptides 2-2 OS=Nelumbo nucifera OX=4432 GN=LOC104596675 PE=4 SV=1	46	24	258	24	542	61.5	7.36	577.22	65.5	66.9	67.1	111.3	108.8	111	127	124.3	123.3	94.9
A0A1U7ZCH9	Ribonuclease OS=Nelumbo nucifera OX=4432 GN=LOC104592690 PE=4 SV=1	53	41	90	41	989	108.5	7.87	227.93	129.7	129.5	130.1	86.4	85.8	85	82.8	84	83.7	102.9
A0A1U8BG36	leucine aminopeptidase 1-like OS=Nelumbo nucifera OX=4432 GN=LOC104610748 PE=3 SV=1	59	24	74	16	574	59.7	8.05	214.68	98.2	99.5	98	103.5	100.8	101.2	99.4	101	100.8	97.6
A0A1U8A4L1	heat shock protein 83 OS=Nelumbo nucifera OX=4432 GN=LOC104600195 PE=3 SV=1	51	44	122	11	703	80.7	5.1	306.65	123	123.7	124.8	99.1	95.6	95.4	76.4	77.8	82.2	102.2
A0A1U8Q0X7	LOW QUALITY PROTEIN: ABA-inducible protein PHV A1-like OS=Nelumbo nucifera OX=4432 GN=LOC104592624 PE=4 SV=1	75	30	151	29	282	29.9	9.07	364.74	79.8	77.4	79.3	108.7	107.2	106.7	115.7	114.3	115.7	95.3
A0A1U8BDX6	uncharacterized protein LOC104609851 OS=Nelumbo nucifera OX=4432 GN=LOC104609851 PE=4 SV=1	19	65	90	65	4347	487	5.88	178.96	96.9	96.7	96.1	103.9	103.1	102.6	97.1	100.6	101.9	101
A0A1U8B0L3	Phosphoglycerate kinase OS=Nelumbo nucifera OX=4432 GN=LOC104606042 PE=3 SV=1	59	28	153	16	486	50.5	8.82	427.42	94.8	92.5	96.8	102.3	100.3	101.1	105.7	104.9	103.5	98.2
A0A1U8A4H3	Alpha-1,4 glucan phosphorylase OS=Nelumbo nucifera OX=4432 GN=LOC104597014 PE=3 SV=1	54	34	86	34	842	96	7.85	206.99	79.3	79.5	79.1	107.2	108.8	107.1	113.5	114.3	114.5	96.7
A0A1U8A2M2	hsp70-Hsp90 organizing protein 3 OS=Nelumbo nucifera OX=4432 GN=LOC104598594 PE=4 SV=1	67	44	107	15	579	65.3	6.81	270.8	107.4	105.5	107.7	100.2	99	100.2	94.3	92.9	92.8	100.1
A0A1U7YXL5	D-3-phosphoglycerate dehydrogenase OS=Nelumbo nucifera OX=4432 GN=LOC104588138 PE=3 SV=1	57	27	98	19	599	63	7.01	266.55	79.2	78.7	78.6	111.4	111.4	111.5	111.6	111	109	97.7
A0A1U7YZ81	Protein disulfide-isomerase OS=Nelumbo nucifera OX=4432 GN=LOC104587542 PE=3 SV=1	56	29	94	21	514	57.5	5	243.33	104.1	106.7	104.9	94.1	95.6	94.3	99.2	98.3	101.3	101.5
A0A1U7ZK82	vicilin-like seed storage protein At2g28490 OS=Nelumbo nucifera OX=4432 GN=LOC104594779 PE=4 SV=1	41	18	256	18	484	54.1	6.01	625.46	81.8	81.6	82.5	107.8	108	108.1	111.2	110.6	110	98.4
A0A1U8BK19	late embryogenesis abundant protein D-34-like OS=Nelumbo nucifera OX=4432 GN=LOC104611702 PE=4 SV=1	58	11	245	10	259	26.7	4.92	756.44	56.4	56.7	56.7	119.7	118.5	121.9	126	124.6	123.6	95.9
A0A1U8B0V0	oil body-associated protein 2B-like OS=Nelumbo nucifera OX=4432 GN=LOC104608419 PE=4 SV=1	59	19	128	19	328	37.6	8.22	329.1	86.4	85.7	88.5	113	111.9	113	103.2	101.2	99.4	97.8
A0A1U8AU32	5-methyltetrahydropteroyltriglutamate-- homocysteine methyltransferase OS=Nelumbo nucifera OX=4432 GN=LOC104604132 PE=3 SV=1	44	29	137	13	765	84.7	6.21	329.86	121.7	119.6	120.9	94.5	92.4	92.5	87.6	86.6	84.6	99.6
A0A1U7ZML4	heat shock 70 kDa protein 15-like OS=Nelumbo nucifera OX=4432 GN=LOC104592243 PE=3 SV=1	45	34	72	18	850	93.6	5.34	187.06	111.3	109.7	109.3	96	97.2	96	92	94.6	93	101
A0A1U8BJF5	heat shock protein 83-like OS=Nelumbo nucifera OX=4432 GN=LOC104611516 PE=3 SV=1	52	41	107	8	701	80.4	5.08	277.25	131.9	129.5	129.8	95.8	90.7	92.1	74.5	78.1	73.2	104.5
A0A1U7ZHM1	Peptidylprolyl isomerase OS=Nelumbo nucifera OX=4432 GN=LOC104590254 PE=4 SV=1	53	35	88	35	572	63.8	5.31	227.11	123.5	121.6	124.5	93.1	93.8	93.5	82.8	82.8	82.4	102
A0A1U8ARJ5	Protein disulfide-isomerase OS=Nelumbo nucifera OX=4432 GN=LOC104605783 PE=3 SV=1	57	30	105	22	509	56.8	4.88	283.31	111.8	112.6	113.2	93.4	93.4	94.4	92.8	91.4	93.9	103.1
A0A1U8Q8S4	Phosphoserine aminotransferase OS=Nelumbo nucifera OX=4432 GN=LOC104604143 PE=3 SV=1	46	20	82	20	429	47.5	7.81	245.73	89.2	88	89.8	108.4	106.9	108.5	105.6	104.3	101.5	97.8
A0A1U8ABL7	hsp70-Hsp90 organizing protein 3-like OS=Nelumbo nucifera OX=4432 GN=LOC104602273 PE=4 SV=1	61	38	97	9	575	65	6.21	242.99	114.5	112	112.3	94.3	95.8	92.9	91.9	90.4	93	103
A0A1U7ZL67	cell division cycle protein 48 homolog OS=Nelumbo nucifera OX=4432 GN=LOC104595085 PE=4 SV=1	49	36	85	5	805	89.5	5.29	226.21	107.6	108.5	103.7	99.8	100.2	100.6	93.3	90.9	94.9	100.4
A0A1U8PZT4	Aminopeptidase OS=Nelumbo nucifera OX=4432 GN=LOC104590405 PE=3 SV=1	45	33	89	33	781	88.6	5.97	236.42	95.7	94.4	95.4	102.9	103.1	102.6	103.5	103	101.2	98
A0A1U8BCY5	seed biotin-containing protein SBP65-like isoform X2 OS=Nelumbo nucifera OX=4432 GN=LOC104612128 PE=4 SV=1	68	24	89	3	258	27.2	8.02	257.79	54.4	58.3	52.9	109.9	111.3	109.3	134.7	134.6	136.4	98.3
A0A1U8BMK1	Pyruvate kinase OS=Nelumbo nucifera OX=4432 GN=LOC104612526 PE=3 SV=1	58	27	122	8	527	57.7	6.81	299.51	101.5	104.2	102.9	106.3	97.8	102.9	93.3	97.8	95.3	98
A0A1U7YVD6	cell division cycle protein 48 homolog OS=Nelumbo nucifera OX=4432 GN=LOC104586338 PE=4 SV=1	52	35	83	4	807	89.6	5.24	216.08	127.6	134.8	129.4	90.4	91.5	89.8	80.5	67.8	79.8	108.3
A0A1U7ZLK6	vicilin-like seed storage protein At2g18540 OS=Nelumbo nucifera OX=4432 GN=LOC104595747 PE=4 SV=1	32	30	115	30	888	106.6	5.11	307.05	92.1	90.4	92.4	100.9	99.5	100.8	110.3	108.8	107.5	97.2
A0A1U8QAU2	low-temperature-induced 65 kDa protein-like isoform X1 OS=Nelumbo nucifera OX=4432 GN=LOC104608723 PE=4 SV=1	50	26	78	25	471	49.8	5.03	210.95	56.9	56.8	56.3	115	115.8	117.8	130.5	129.2	126.3	95.3
A0A1U8BMS8	embryonic protein DC-8-like OS=Nelumbo nucifera OX=4432 GN=LOC104612789 PE=4 SV=1	64	29	243	29	485	50.1	7.43	678	46.2	46.5	46.7	124.6	121.5	120.8	133.8	131.3	135.8	92.8
A0A1U8AVI8	T-complex protein 1 subunit beta OS=Nelumbo nucifera OX=4432 GN=LOC104604348 PE=3 SV=1	56	29	75	29	527	57.2	6	168.98	107.6	106.8	108.9	97.9	98.2	98.1	93.7	93.9	94.3	100.4
A0A1U8AQ38	11S globulin subunit beta-like OS=Nelumbo nucifera OX=4432 GN=LOC104602872 PE=4 SV=1	41	23	116	20	674	76.6	5.5	302.26	103.4	105.6	103.6	89.8	90.9	91.1	104.6	104.2	104.8	101.9
A0A1U8B5M0	chaperone protein ClpB1 OS=Nelumbo nucifera OX=4432 GN=LOC104611040 PE=3 SV=1	44	34	60	32	902	100.5	6.83	169.75	93.2	93.1	93.8	109.7	110.6	111.3	95.9	95.1	96	101.3
A0A1U7ZFB2	UTP--glucose-1-phosphate uridylyltransferase OS=Nelumbo nucifera OX=4432 GN=LOC104589540 PE=3 SV=1	65	24	75	14	475	52.2	5.69	206.65	109.8	106.8	107.9	98.2	96.9	95.8	94.1	96	94.4	100.2
A0A1U7Z3J3	ruBisCO large subunit-binding protein subunit alpha-like isoform X1 OS=Nelumbo nucifera OX=4432 GN=LOC104586351 PE=3 SV=1	45	25	72	11	583	61.7	5.25	206.93	115.3	113.8	115.6	98.8	98	96.7	86.5	86.2	86.2	102.9
A0A1U8BCE3	protein DJ-1 homolog B-like OS=Nelumbo nucifera OX=4432 GN=LOC104613106 PE=4 SV=1	51	22	102	22	436	46.7	8.07	219.11	71.9	74.2	70.7	111.8	112.2	114	116.9	116.3	113.5	98.6
A0A1U8B9Y6	glucose and ribitol dehydrogenase OS=Nelumbo nucifera OX=4432 GN=LOC104612386 PE=4 SV=1	68	18	151	18	293	31.7	7.44	405.52	66.8	67.6	67.7	110.7	108.4	109.7	126.5	123.4	123.9	95.4
A0A1U7ZS47	ubiquitin-activating enzyme E1 1 OS=Nelumbo nucifera OX=4432 GN=LOC104597299 PE=3 SV=1	33	34	71	34	1108	123.5	5.48	177.79	114.9	114.9	115.2	93.3	94	93.3	90.9	91.7	89.5	102.3
A0A1U7ZRG9	late embryogenesis abundant protein D-34 OS=Nelumbo nucifera OX=4432 GN=LOC104596543 PE=4 SV=1	79	11	106	10	258	26.8	4.6	241.29	54.2	55.5	53.6	119.5	120	120.2	126.6	127.4	127.8	95.2
A0A1U8AZG4	heat shock 70 kDa protein-like OS=Nelumbo nucifera OX=4432 GN=LOC104609133 PE=3 SV=1	44	30	102	8	660	72.3	5.69	270.24	122.8	117.4	120.1	98.5	100.1	102.8	78.7	77.2	78.9	103.6
D3WC82	Ribulose bisphosphate carboxylase large chain OS=Nelumbo nucifera OX=4432 GN=rbcL PE=3 SV=1	54	23	142	23	475	52.7	6.48	294.1	89	89.1	87.6	106.7	106	107.4	106.8	103.9	103.5	99.9
A0A1U8ATC4	stromal 70 kDa heat shock-related protein, chloroplastic OS=Nelumbo nucifera OX=4432 GN=LOC104603897 PE=3 SV=1	46	34	87	9	713	75.9	5.39	233.33	118	115.5	119.2	94.1	95	95.8	86.4	88.8	85.1	101.8
A0A1U8QAD5	seed biotin-containing protein SBP65-like isoform X1 OS=Nelumbo nucifera OX=4432 GN=LOC104612128 PE=4 SV=1	62	24	79	3	284	29.7	6.64	241.24	36.7	37.4	37.6	123.2	120.7	121.6	147.9	144.4	140.3	90.2
A0A1U7ZWC8	ATP synthase subunit beta OS=Nelumbo nucifera OX=4432 GN=LOC104594252 PE=3 SV=1	51	20	102	1	558	59.7	6.34	225.89	101.5	100.4	95.9	99.9	108.5	104.6	89.8	96.5	100	102.9
A0A1U8B872	aspartate--tRNA ligase 2, cytoplasmic-like OS=Nelumbo nucifera OX=4432 GN=LOC104611773 PE=3 SV=1	59	30	72	30	550	61.4	6.35	178.68	95.6	96.3	95.8	106.4	104.9	108	100.3	97.6	95.2	99.9
A0A1U8AEQ0	alcohol dehydrogenase 1-like OS=Nelumbo nucifera OX=4432 GN=LOC104602143 PE=3 SV=1	57	18	101	13	384	41.7	6.6	251.5	81.4	79.5	81.8	111.4	110.5	110.2	108.1	109.4	109.6	98.1
A0A1U8A6L6	Glycine cleavage system P protein OS=Nelumbo nucifera OX=4432 GN=LOC104600737 PE=3 SV=1	34	28	62	28	1043	113.3	7.31	145.41	89.7	88.1	90.7	103.7	105.5	106	105.8	106.4	105.9	98.1
A0A1U7ZJL3	heat shock 70 kDa protein 15-like OS=Nelumbo nucifera OX=4432 GN=LOC104595227 PE=3 SV=1	41	32	60	16	851	93.7	5.39	153.78	112.7	110	113.4	98.2	97.3	98.8	89.2	89	91.3	100
A0A1U7Z7N6	eIF-2-alpha kinase activator GCN1 isoform X1 OS=Nelumbo nucifera OX=4432 GN=LOC104587628 PE=4 SV=1	21	50	62	50	2629	287	7.05	149.75	102.4	105.8	101.2	98.9	100.4	99.3	97.2	94.4	96.8	103.7
A0A1U8Q9H2	Pyruvate kinase OS=Nelumbo nucifera OX=4432 GN=LOC104610149 PE=3 SV=1	50	22	89	10	512	55.4	8.44	219.28	91.6	92.5	92.7	105.5	103.8	103.9	106.9	104	101.9	97.2
A0A1U7ZZN4	6-phosphogluconate dehydrogenase, decarboxylating OS=Nelumbo nucifera OX=4432 GN=LOC104597825 PE=3 SV=1	62	25	57	9	486	53.6	6.06	161.08	90.9	90.2	91.6	105.7	105	104.5	104.7	106	104.5	97
A0A1U8BCI6	pyruvate decarboxylase 1-like OS=Nelumbo nucifera OX=4432 GN=LOC104613083 PE=3 SV=1	36	19	99	16	589	63.7	6.02	248.35	73.2	74.2	73	109.8	111.3	112.3	115.8	115.6	117	97.8
A0A1U8BJB0	late embryogenesis abundant protein D-34-like OS=Nelumbo nucifera OX=4432 GN=LOC104611694 PE=4 SV=1	76	14	116	14	238	24.9	5.14	328.51	53.9	56.1	53.4	120.8	122.4	121.2	126.7	122.6	127.2	95.7
A0A1U7Z806	ATP synthase subunit beta OS=Nelumbo nucifera OX=4432 GN=LOC104587740 PE=3 SV=1	51	20	99	1	558	59.8	6.42	222.73	92	94	93.3	102.3	104.8	104.9	102.4	103	103.1	100.3
A0A1U7YT59	elongation factor 1-gamma-like OS=Nelumbo nucifera OX=4432 GN=LOC104586685 PE=4 SV=1	50	21	85	10	424	48.4	6.61	234.72	101.1	101.8	102	100.3	102.1	104.2	95.3	94.7	97.3	101.3
A0A1U7ZTP6	Dihydrolipoyl dehydrogenase OS=Nelumbo nucifera OX=4432 GN=LOC104593915 PE=3 SV=1	54	21	54	2	510	54	7.37	150.21	94.4	92.6	93.7	106.4	103.1	104	104.1	103.9	100.5	97.2
A0A1U7ZE14	heat shock 70 kDa protein, mitochondrial OS=Nelumbo nucifera OX=4432 GN=LOC104589571 PE=3 SV=1	42	28	63	6	676	72.5	5.68	178.17	98.4	98.9	102.1	103.1	103.8	104.3	98.1	97.7	95.7	97.9
A0A1U8AJZ8	calreticulin OS=Nelumbo nucifera OX=4432 GN=LOC104605095 PE=3 SV=1	55	28	84	27	420	48.2	4.64	188.7	105.4	102.8	105.2	97.3	97.6	98.4	100	99.6	96.4	97.3
A0A1U8AY80	Adenosylhomocysteinase OS=Nelumbo nucifera OX=4432 GN=LOC104605109 PE=3 SV=1	56	21	92	5	485	53	6.3	245.6	116.5	116	117.9	93.1	90.3	92.6	91.5	91.7	90.2	100.1
A0A1U8BJ10	phosphoenolpyruvate carboxylase, housekeeping isozyme-like OS=Nelumbo nucifera OX=4432 GN=LOC104611594 PE=3 SV=1	44	41	72	18	964	110	6.68	166.81	136.3	134.1	136.9	86.4	88.8	89.7	73.7	74.6	74.7	104.9
A0A1U7Z7L9	calnexin homolog OS=Nelumbo nucifera OX=4432 GN=LOC104591915 PE=3 SV=1	44	23	81	6	535	60.6	4.86	185.15	107.2	106.3	107	95.8	96.2	97.9	96.6	98.3	96.4	98.2
A0A1U8A5I3	60S ribosomal protein L4 OS=Nelumbo nucifera OX=4432 GN=LOC104599344 PE=4 SV=1	52	22	79	9	406	44.7	10.37	221.06	103.3	101.5	104	98	96.2	96.5	101.1	101.5	99.3	98.7
A0A1U8APP0	ERBB-3 BINDING PROTEIN 1-like OS=Nelumbo nucifera OX=4432 GN=LOC104602562 PE=4 SV=1	61	22	60	10	397	43.9	6.64	158.65	99.4	98	100.9	102.9	102.2	101.5	100.1	98.2	97.7	99
A0A1U8B013	uncharacterized protein LOC104608188 OS=Nelumbo nucifera OX=4432 GN=LOC104608188 PE=4 SV=1	62	16	112	16	220	23.6	6.32	327.31	74.7	75.6	75.7	116.3	114.9	115.2	111.8	110	109	96.8
A0A1U7YZB0	Elongation factor 1-alpha OS=Nelumbo nucifera OX=4432 GN=LOC104588640 PE=3 SV=1	43	19	191	6	449	49.4	9.06	537.73	113.5	112.7	114.9	95	93.1	93.4	92.9	92	91.4	100.9
A0A1U7ZA61	alcohol dehydrogenase-like OS=Nelumbo nucifera OX=4432 GN=LOC104587947 PE=3 SV=1	61	18	134	12	380	41.2	7.15	339.62	58.2	59.3	59	114.2	114.4	116.6	128.8	128.3	126	95.3
A0A1U8AQI2	T-complex protein 1 subunit zeta 1 OS=Nelumbo nucifera OX=4432 GN=LOC104603006 PE=3 SV=1	62	26	71	8	535	59.1	6.29	157.96	107.5	108.9	108.8	98.2	98	97.3	92.7	91.6	95.7	101.3
A0A1U8ACI8	ubiquitin carboxyl-terminal hydrolase 12 isoform X1 OS=Nelumbo nucifera OX=4432 GN=LOC104601486 PE=3 SV=1	38	40	63	28	1116	130.9	5.99	140.73	105.7	105	104.4	101.2	102	100.5	94.3	94.3	93.1	99.6
A0A1U7ZNH2	Glucose-6-phosphate isomerase OS=Nelumbo nucifera OX=4432 GN=LOC104595713 PE=3 SV=1	47	25	81	13	568	62.8	7.64	225.28	95.4	93.3	95.5	102.7	101.5	102.8	104.3	104.8	102.3	97.6
A0A1U7ZTL0	low-temperature-induced 65 kDa protein isoform X1 OS=Nelumbo nucifera OX=4432 GN=LOC104596106 PE=4 SV=1	62	22	68	21	403	43.1	5.06	201.96	46.1	46.7	47.3	120	119.2	120.1	138.4	135.7	134	92.6
A0A1U8A0P9	heat shock 70 kDa protein, mitochondrial isoform X1 OS=Nelumbo nucifera OX=4432 GN=LOC104595560 PE=3 SV=1	41	28	60	9	678	73.1	5.68	167.73	102.5	100.1	102.5	102.8	102.5	101	97	96.8	95.5	99.3
A0A1U7ZVP9	protein TIC110, chloroplastic-like OS=Nelumbo nucifera OX=4432 GN=LOC104596701 PE=4 SV=1	36	31	54	18	1008	111.4	5.68	134.52	113.8	113.8	114.1	94.2	94.2	96.3	87.8	91.9	90.1	103.8
A0A1U7ZV26	Dihydrolipoyl dehydrogenase OS=Nelumbo nucifera OX=4432 GN=LOC104593916 PE=3 SV=1	49	20	50	1	509	53.8	7.2	139.91	84.9	92.5	92.1	107.1	101.6	97.8	108	106.1	110.2	99.7
A0A1U8AY07	ATP-citrate synthase beta chain protein 2 OS=Nelumbo nucifera OX=4432 GN=LOC104605046 PE=4 SV=1	49	26	66	11	608	66.1	7.9	171.02	118.5	118.6	118.2	92.5	90.9	93.5	91.4	87.5	89.1	99.8
A0A1U7ZZA9	galactokinase OS=Nelumbo nucifera OX=4432 GN=LOC104598734 PE=4 SV=1	57	25	55	25	498	54.3	5.73	143.07	88.1	88.2	90	107.6	109.8	108.6	103.2	104.2	101.9	98.5
A0A1U7ZZ18	ruBisCO large subunit-binding protein subunit alpha isoform X1 OS=Nelumbo nucifera OX=4432 GN=LOC104595074 PE=3 SV=1	46	25	63	12	586	61.6	5.35	181.01	134.6	132.3	134.3	97.2	92	92	68.7	69.9	72	106.9
A0A1U7ZHP3	actin-3 OS=Nelumbo nucifera OX=4432 GN=LOC104593066 PE=3 SV=1	55	16	113	2	377	41.6	5.49	273.78	118.4	115.1	118.5	94.6	96.3	96.7	89.5	85.7	85.9	99.5
A0A1U7Z2T9	Sucrose synthase OS=Nelumbo nucifera OX=4432 GN=LOC104590476 PE=3 SV=1	44	35	80	22	806	92.6	6.43	178.38	165.1	158.6	163.1	71.9	71.8	70.7	63.2	65.7	64.7	105.2
A0A1U8A9Q0	plasminogen activator inhibitor 1 RNA-binding protein OS=Nelumbo nucifera OX=4432 GN=LOC104598415 PE=4 SV=1	45	16	50	14	358	38.6	7.05	138.98	93.7	92.9	95.9	101.1	98.2	101.3	107.8	108.1	104.2	96.9
A0A1U8APG8	aldose reductase-like OS=Nelumbo nucifera OX=4432 GN=LOC104602502 PE=4 SV=1	62	21	123	20	322	36.1	6.65	275.62	61.5	61.4	62.6	121	122.2	120.9	120.1	119.3	116.1	94.8
A0A1U7Z783	ATP-dependent Clp protease ATP-binding subunit ClpA homolog CD4B, chloroplastic OS=Nelumbo nucifera OX=4432 GN=LOC104591837 PE=3 SV=1	43	35	69	34	916	101.5	6.42	154	110.9	110	109.5	97.2	98.7	98.3	91	90.1	90.6	103.6
A0A1U8AWK2	elongation factor 1-gamma-like isoform X1 OS=Nelumbo nucifera OX=4432 GN=LOC104608303 PE=4 SV=1	38	21	73	10	487	54.9	6.81	206.37	105.9	105.5	107.2	97.2	95.1	96.7	98.3	98.4	95.5	100.4
A0A1U8A8Z1	Coatomer subunit alpha OS=Nelumbo nucifera OX=4432 GN=LOC104602012 PE=4 SV=1	38	40	62	12	1218	136.4	7.33	147.17	125.6	126.9	127.3	88.3	88.7	87.7	84.6	84.8	82.9	103.2
A0A1U7YTW5	Fructose-bisphosphate aldolase OS=Nelumbo nucifera OX=4432 GN=LOC104587765 PE=3 SV=1	56	18	107	8	358	38.5	6.99	289.17	86.5	91.1	91.1	101.1	108.6	106.4	103.5	105	104.1	102.7
A0A1U7YP13	actin-101 OS=Nelumbo nucifera OX=4432 GN=LOC104586251 PE=3 SV=1	55	16	111	1	377	41.6	5.49	267.94	114.9	114.6	112.2	96.6	98.6	103.2	84.8	85.3	86.6	103.3
G1ETN3	Annexin OS=Nelumbo nucifera OX=4432 GN=LOC104590190 PE=2 SV=1	65	23	94	23	315	35.7	6.7	242.3	115	115.5	114.7	90.6	89.5	88.7	96.7	95.5	94.1	99.7
A0A1U7Z4P8	Glyceraldehyde-3-phosphate dehydrogenase OS=Nelumbo nucifera OX=4432 GN=LOC104586725 PE=3 SV=1	54	17	203	2	337	36.5	7.05	462	84.4	82.1	104.2	115.1	99.6	124.1	99.1	86	100.5	104.9
A0A1U7ZCI3	Tubulin alpha chain OS=Nelumbo nucifera OX=4432 GN=LOC104589106 PE=3 SV=1	62	22	81	2	451	49.6	5.06	224.6	153.9	155.3	150.3	77.6	83.7	83.8	62.6	64.9	62.7	105.1
A0A1U8A1P3	actin-101-like OS=Nelumbo nucifera OX=4432 GN=LOC104599877 PE=3 SV=1	55	16	110	1	377	41.6	5.49	262.74	101.2	122.5	97.4	82.3	80.6	94.9	82.4	113.1	114.7	111.1
A0A1U8BCN0	phosphoenolpyruvate carboxylase, housekeeping isozyme OS=Nelumbo nucifera OX=4432 GN=LOC104613119 PE=3 SV=1	43	39	71	16	964	109.9	6.76	165.36	130.8	130.1	127	90	87.5	87.4	80.4	80.2	82.2	104.4
A0A1U7ZB70	Pyruvate kinase OS=Nelumbo nucifera OX=4432 GN=LOC104591283 PE=3 SV=1	47	20	64	5	510	55.1	7.91	177.15	106.2	112.8	108.7	97.6	96.9	93.9	98.6	93.6	90.6	101.1
A0A1U7YPQ3	NADPH-protochlorophyllide oxidoreductase OS=Nelumbo nucifera OX=4432 GN=LOC104586453 PE=3 SV=1	37	17	96	8	400	43.4	9.33	289.06	224.2	219.4	226.3	36.4	37.1	34.9	35.4	38.1	37.4	110.8
A0A1U8B9L7	Tubulin beta chain OS=Nelumbo nucifera OX=4432 GN=LOC104608711 PE=3 SV=1	57	18	79	2	446	50.2	4.89	195.69	109.6	117.9	115.8	90.3	89.1	89.2	93	93.1	93.6	108.5
A0A1U8AC02	glutathione S-transferase-like OS=Nelumbo nucifera OX=4432 GN=LOC104599001 PE=3 SV=1	51	10	111	8	215	24.1	6.52	280.58	83.5	85.2	86.5	108.7	106.4	109.8	106	104.9	109.4	99.5
A0A1U8A8N6	heat shock protein 90-5, chloroplastic-like OS=Nelumbo nucifera OX=4432 GN=LOC104597851 PE=3 SV=1	48	30	64	12	794	90.3	5.08	135.07	103.8	103.2	105	99.1	99.8	102.2	93.2	96.7	96.8	100.1
A0A1U8B5Q0	Coatomer subunit alpha OS=Nelumbo nucifera OX=4432 GN=LOC104607548 PE=4 SV=1	35	38	62	10	1218	136.8	7.21	144.46	118.7	115.6	116.3	87.8	105.5	95.8	81.3	84.3	89.4	105.3
A0A1U8B8Z1	2-oxoglutarate dehydrogenase, mitochondrial-like OS=Nelumbo nucifera OX=4432 GN=LOC104611994 PE=4 SV=1	37	31	55	31	1021	116	6.96	104.24	100.2	100.2	99.7	98.4	97.7	97.3	100.7	103.9	101.7	100.3
A0A1U7ZYS6	BAG family molecular chaperone regulator 7-like OS=Nelumbo nucifera OX=4432 GN=LOC104598570 PE=4 SV=1	45	21	67	21	423	47.2	9.19	170.91	90.7	88.7	90.8	103.6	104.1	104	106.6	108.4	105.9	97.3
A0A1U7ZPN9	Plasma membrane ATPase OS=Nelumbo nucifera OX=4432 GN=LOC104596580 PE=3 SV=1	39	30	41	11	970	106.6	7.05	112.57	124.2	125	126.8	87.8	88.9	85.2	87.6	84.8	86.7	103.1
A0A1U7ZJD3	Pyruvate kinase OS=Nelumbo nucifera OX=4432 GN=LOC104591309 PE=3 SV=1	45	19	69	5	514	55.4	6.79	180.63	112.9	112.2	113.8	93.8	94.9	95.3	89.7	94.2	94.8	98.4
A0A1U7ZGU7	enhancer of mRNA-decapping protein 4 OS=Nelumbo nucifera OX=4432 GN=LOC104594385 PE=4 SV=1	26	31	44	21	1411	152.6	5.96	121.02	111.6	110.6	113.2	93.5	94.6	94	94.9	93.5	92	102
A0A1U8A2Q7	RAN GTPase-activating protein 2 OS=Nelumbo nucifera OX=4432 GN=LOC104596479 PE=4 SV=1	52	22	45	22	542	59.2	4.68	119.69	105.2	104.7	105.3	97.6	96.8	98.6	99.5	96.4	97	98.9
A0A1U8AGA3	60S ribosomal protein L3 OS=Nelumbo nucifera OX=4432 GN=LOC104599935 PE=3 SV=1	49	27	77	11	389	44.4	10.11	202.37	103.8	102.2	105.7	96.6	95.8	96	102.5	98.7	99.9	98.8
A0A1U8AY02	14-3-3-like protein OS=Nelumbo nucifera OX=4432 GN=LOC104608650 PE=3 SV=1	68	18	66	12	264	29.7	4.77	174.89	108.9	111.8	112.9	95.3	96	95.3	94.6	92.1	93.9	99.2
A0A1U8B802	V-type proton ATPase catalytic subunit A OS=Nelumbo nucifera OX=4432 GN=LOC104611712 PE=3 SV=1	50	31	59	9	623	68.9	5.52	153.59	106.8	106.8	106.6	101.3	99.2	99.6	93.6	92.1	93.1	100.8
A0A1U8A741	T-complex protein 1 subunit theta OS=Nelumbo nucifera OX=4432 GN=LOC104597701 PE=3 SV=1	45	21	46	21	544	58.7	5.72	129.28	114.6	111	110.5	96.4	97.1	96.6	90.6	93.7	89.5	100
A0A1U8A1D4	Tubulin beta chain OS=Nelumbo nucifera OX=4432 GN=LOC104596096 PE=3 SV=1	57	18	77	2	446	50.1	4.86	185.17	145.1	145.4	144.8	79.2	79.5	78.9	71.7	74.9	74	106.6
A0A1U8A4S9	heat shock protein 90-5, chloroplastic-like OS=Nelumbo nucifera OX=4432 GN=LOC104600243 PE=3 SV=1	48	31	57	13	793	90.2	5.19	124.55	124.5	124.1	123.7	90.6	91.7	92.1	83.1	83.9	81.5	104.8
A0A1U8Q745	uncharacterized protein LOC104600806 OS=Nelumbo nucifera OX=4432 GN=LOC104600806 PE=4 SV=1	24	19	62	2	857	95.9	6.2	157.3	112.1	111.6	112.7	97.8	95.8	97.4	89.8	91.3	91.2	100.3
A0A1U7ZYD0	DNA-damage-repair/toleration protein DRT100-like OS=Nelumbo nucifera OX=4432 GN=LOC104597475 PE=4 SV=1	65	16	50	14	364	39.2	8.18	147	67.9	67.5	69.5	119.5	118.4	116.6	115	114.3	114.1	97.2
A0A1U7ZG80	T-complex protein 1 subunit delta OS=Nelumbo nucifera OX=4432 GN=LOC104592688 PE=3 SV=1	50	24	45	6	535	57.8	7.46	140.74	102.2	101	105.4	99.3	99.6	100.5	98.5	98	96.8	98.7
A0A1U7YT44	eukaryotic initiation factor 4A-11 OS=Nelumbo nucifera OX=4432 GN=LOC104586670 PE=3 SV=1	45	18	61	1	413	46.9	5.58	158.66
A0A1U7ZQQ4	glycine--tRNA ligase, mitochondrial 1-like OS=Nelumbo nucifera OX=4432 GN=LOC104592742 PE=4 SV=1	40	28	59	13	719	80.3	6.84	152.94	115.5	114.2	112.9	94.1	95.6	92.6	89.5	91.2	93.3	101.2
A0A1U7ZJM3	Adenosylhomocysteinase OS=Nelumbo nucifera OX=4432 GN=LOC104594645 PE=3 SV=1	58	20	81	3	485	52.9	6.19	194.68	119.3	111.8	114.2	91	88.8	91	94.9	94.6	95.1	99.4
A0A1U8B3H7	Pyrophosphate--fructose 6-phosphate 1-phosphotransferase subunit alpha OS=Nelumbo nucifera OX=4432 GN=LOC104606877 PE=3 SV=1	45	21	56	15	617	67.5	6.96	156.28	121.6	119.7	121.5	91.9	91.2	94.5	85.2	87	84.7	102.8
A0A1U7ZK84	Phospholipase D OS=Nelumbo nucifera OX=4432 GN=LOC104595387 PE=3 SV=1	46	28	59	28	802	91.4	5.95	140.42	107.5	107.8	107.9	97.4	94.4	99.9	94.6	95.7	95.1	99.7
A0A1U7Z683	T-complex protein 1 subunit gamma OS=Nelumbo nucifera OX=4432 GN=LOC104587198 PE=3 SV=1	53	31	56	31	556	60.3	6.58	148.09	111.7	110.9	112.1	96.1	97.7	97	92.3	92.2	89.8	100.2
A0A1U7Z4W7	Tubulin alpha chain OS=Nelumbo nucifera OX=4432 GN=LOC104586772 PE=3 SV=1	62	22	78	2	451	49.6	5.1	210.61	169.4	169.4	170.2	66.7	65.2	66.6	61.3	62	62.8	106.4
A0A1U7ZLM9	calnexin homolog OS=Nelumbo nucifera OX=4432 GN=LOC104591917 PE=3 SV=1	38	20	71	3	535	60.7	4.94	165.58	104.1	117.5	106.5	93.9	90.4	94.1	94	99.5	96.7	103.2
A0A1U8AQM2	Peroxidase OS=Nelumbo nucifera OX=4432 GN=LOC104605488 PE=3 SV=1	45	17	142	11	358	38.7	8.43	481.76	84.2	83	84.6	102.8	101.8	101.4	116.3	115	113.9	97.1
A0A144ZK66	1-Cys peroxiredoxin OS=Nelumbo nucifera OX=4432 GN=LOC104607108 PE=2 SV=1	64	18	98	16	219	24.3	6.3	256.34	91.1	89.6	94.3	106.5	106	106.7	104.1	103.3	100	98.4
A0A1U8B3N7	argininosuccinate synthase, chloroplastic OS=Nelumbo nucifera OX=4432 GN=LOC104610467 PE=3 SV=1	47	23	69	23	492	53.9	6.8	179.06	92.8	92.8	93	103.2	105.6	104.5	103	102.4	104.1	98.5
A0A1U8ALH4	14-3-3-like protein OS=Nelumbo nucifera OX=4432 GN=LOC104601539 PE=3 SV=1	70	19	65	5	262	29.5	4.81	167.39	118.9	115.3	118.1	94.2	93.7	94.1	88.2	88.7	88.4	100.4
A0A1U8AGU4	6-phosphogluconate dehydrogenase, decarboxylating OS=Nelumbo nucifera OX=4432 GN=LOC104600406 PE=3 SV=1	51	23	45	8	511	56.4	8.4	128.71	90.8	92.8	90	105.3	108.7	107.1	98.7	103.7	103.9	99.2
A0A1U7ZD92	glycine--tRNA ligase, mitochondrial 1-like OS=Nelumbo nucifera OX=4432 GN=LOC104591869 PE=4 SV=1	41	28	59	13	691	77.2	6.55	143.97	109.1	110.9	108.4	93.9	96.9	97.4	91	93.9	97.7	100.8
A0A1U8ALI9	T-complex protein 1 subunit eta OS=Nelumbo nucifera OX=4432 GN=LOC104604289 PE=3 SV=1	44	23	47	11	562	60.6	7.06	130.23	107.5	107.7	105.6	97.6	97	98	95.1	96.8	93.7	101.1
A0A1U8A7S6	aldo-keto reductase family 4 member C9-like OS=Nelumbo nucifera OX=4432 GN=LOC104601121 PE=4 SV=1	73	19	69	14	315	35.4	6.7	184.27	91.4	90.1	89.9	105.9	107.4	109.5	103.2	102.4	100.7	99.5
A0A1U8Q0I3	stromal 70 kDa heat shock-related protein, chloroplastic-like OS=Nelumbo nucifera OX=4432 GN=LOC104586953 PE=3 SV=1	54	26	67	1	539	57.9	5.81	174.22
A0A1U7YZZ1	60S ribosomal protein L3-like OS=Nelumbo nucifera OX=4432 GN=LOC104589599 PE=3 SV=1	56	27	74	11	389	44.3	10.13	189.79	110.5	105.1	113.3	93	91.6	93.5	98.9	98.6	97.5	98
A0A1U8A6H4	actin OS=Nelumbo nucifera OX=4432 GN=LOC104597559 PE=3 SV=1	55	16	90	3	377	41.7	5.49	227.63	120.7	112.2	113.1	94.1	101.3	85.8	92.7	88.3	90.4	101.5
A0A1U8ADW2	Coatomer subunit gamma OS=Nelumbo nucifera OX=4432 GN=LOC104601891 PE=3 SV=1	44	29	52	9	887	98.5	5.3	125.53	120.7	122.7	116.5	85.7	94.1	87.4	89.7	84.4	90.7	108
A0A1U8B632	Pyruvate kinase OS=Nelumbo nucifera OX=4432 GN=LOC104610148 PE=3 SV=1	44	19	63	4	510	55.2	7.75	162	98.2	103.2	96.7	99.3	94.8	97.6	101.4	103.5	98.7	106.7
A0A1U7Z456	Aspartate aminotransferase OS=Nelumbo nucifera OX=4432 GN=LOC104589052 PE=4 SV=1	52	22	50	21	470	51	8.48	142.82	109.8	107.9	110.3	96.5	97.4	94.2	95.2	95	94	99.6
A0A1U8B3C7	heat shock protein 90-6, mitochondrial-like isoform X1 OS=Nelumbo nucifera OX=4432 GN=LOC104606598 PE=3 SV=1	35	26	54	13	795	90.6	5.63	119.43	110	113.2	112.8	94.7	95.2	96.4	90.8	92.7	92	102.2
A0A1U7ZN85	Malic enzyme OS=Nelumbo nucifera OX=4432 GN=LOC104592062 PE=3 SV=1	45	21	58	11	591	65.1	6.8	143.87	87	87.4	85.6	108.2	107.7	109.1	106	105.7	103.6	99.7
A0A1U7ZP90	Elongation factor Tu OS=Nelumbo nucifera OX=4432 GN=LOC104592307 PE=3 SV=1	49	19	63	2	496	53.8	6.98	127.8	86.8	88.1	94.2	100	102	111.1	112.9	108.3	104.6	92.1
A0A1U8AI53	heat shock 70 kDa protein-like OS=Nelumbo nucifera OX=4432 GN=LOC104603244 PE=3 SV=1	33	25	82	3	659	72.3	5.62	216.26	90.6	94.7	97.4	115.4	116.2	116.8	93.7	85.4	87	102.7
A0A1U8AFZ9	pyruvate decarboxylase 2 OS=Nelumbo nucifera OX=4432 GN=LOC104602557 PE=3 SV=1	31	15	67	11	606	65.2	6.52	164.32	53.1	52.7	52.9	122	119.3	121.5	127.6	128.5	127.3	95.1
A0A1U8AJN3	phosphoglucomutase, cytoplasmic OS=Nelumbo nucifera OX=4432 GN=LOC104603722 PE=3 SV=1	48	22	51	11	582	63.6	5.62	154.45	101.2	99.9	101.7	101.8	101.5	100.8	98.2	98.4	97.6	99
A0A1U8AE29	14-3-3-like protein OS=Nelumbo nucifera OX=4432 GN=LOC104603009 PE=3 SV=1	62	18	63	5	262	29.6	4.81	169	120.4	114.4	114.7	91.4	92.4	94.4	91.3	91.1	88.3	101.7
A0A1U8BH93	Elongation factor Tu OS=Nelumbo nucifera OX=4432 GN=LOC104610853 PE=3 SV=1	49	19	61	2	503	54.3	7.12	123.09	95.7	95.1	93	103.9	105	104.8	102.7	98.9	101.3	99.6
B9VQB3	1,4-alpha-glucan-branching enzyme 1, chloroplastic/amyloplastic-like OS=Nelumbo nucifera OX=4432 GN=SbeI PE=2 SV=1	31	28	71	27	858	97.1	5.38	184.09	78.1	80.6	78.6	112.2	112	110.7	109.7	109.3	110.5	98.3
D3WC35	ATP synthase subunit beta, chloroplastic OS=Nelumbo nucifera OX=4432 GN=atpB PE=3 SV=1	47	16	42	16	498	53.7	5.33	106.57	103.8	103.6	99.2	99.2	100.1	100	97.9	97.3	97.5	101.3
A0A1U8A024	Coatomer subunit gamma OS=Nelumbo nucifera OX=4432 GN=LOC104595720 PE=3 SV=1	46	30	50	10	888	98.7	5.19	117.65	124.5	123.6	127.6	89.2	89.8	87.6	85.9	85.3	82.5	104
A0A1U8AZ14	Serine hydroxymethyltransferase OS=Nelumbo nucifera OX=4432 GN=LOC104609082 PE=3 SV=1	49	19	46	19	471	52.1	7.46	117.9	113.9	112.8	113.7	95.4	96.2	94.9	89.5	91.6	90.2	101.8
A0A1U7Z9M7	Tubulin beta chain OS=Nelumbo nucifera OX=4432 GN=LOC104587798 PE=3 SV=1	49	16	59	4	447	50.3	4.83	133.16	157.8	159.1	158.1	70.2	74	72.7	68.9	64.7	71	103.5
A0A1U7ZPK8	ERBB-3 BINDING PROTEIN 1 OS=Nelumbo nucifera OX=4432 GN=LOC104594937 PE=4 SV=1	54	19	49	7	397	44	6.7	128.13	111.7	108.6	111.1	99.7	96.2	103	88.2	90.7	88.4	102.5
A0A1U7ZF51	cullin-associated NEDD8-dissociated protein 1 isoform X1 OS=Nelumbo nucifera OX=4432 GN=LOC104593933 PE=4 SV=1	29	32	51	32	1221	134.5	6.21	123.36	101.2	109.5	99.1	104.2	101.6	107.5	89.5	90	98.5	99
A0A1U8BBC0	alanine aminotransferase 2-like OS=Nelumbo nucifera OX=4432 GN=LOC104609254 PE=4 SV=1	52	23	53	17	522	57.1	6.54	136.52	107.3	107.2	110.4	92.6	93.9	94.1	99.2	98.2	97.1	99.8
A0A1U7ZSE0	40S ribosomal protein S2-3-like OS=Nelumbo nucifera OX=4432 GN=LOC104597392 PE=3 SV=1	51	17	63	5	275	30.1	10.37	157.08	105.7	104.1	106.9	99.7	97.3	97.5	96.8	97.8	94.9	99.4
A0A1U8A7Q6	auxin transport protein BIG isoform X1 OS=Nelumbo nucifera OX=4432 GN=LOC104600002 PE=4 SV=1	10	45	52	45	5103	568.1	6.01	102.28	117.6	116.6	115.8	92.6	93.5	92.3	92	88.1	89.5	102
A0A1U8ACK5	late embryogenesis abundant protein EMB564-like OS=Nelumbo nucifera OX=4432 GN=LOC104602566 PE=4 SV=1	74	9	192	8	92	9.7	5.54	443.3	55.5	55.9	55.8	126.3	118	119	122.3	119.1	133.3	95
A0A1U8Q0N6	spermatogenesis-associated protein 20 isoform X1 OS=Nelumbo nucifera OX=4432 GN=LOC104587579 PE=4 SV=1	34	26	55	26	854	96.6	6.58	134.27	67.9	67.1	68.4	118.2	119.7	118.2	115.2	116	112	97.2
A0A1U8B9B2	T-complex protein 1 subunit alpha OS=Nelumbo nucifera OX=4432 GN=LOC104611038 PE=3 SV=1	41	21	56	7	546	59.1	5.76	137.14	107.8	106.8	108.8	98.8	98.1	98.7	92.9	93	93.4	101.8
A0A1U8B103	cell division cycle and apoptosis regulator protein 1 OS=Nelumbo nucifera OX=4432 GN=LOC104609729 PE=4 SV=1	27	32	40	32	1400	156.7	7.27	87.11	98.9	98.6	99.2	98.7	97.2	99.4	103	103.8	102.2	99
A0A1U8ATF9	protein transport protein SEC31 homolog B-like OS=Nelumbo nucifera OX=4432 GN=LOC104606298 PE=4 SV=1	30	28	44	18	1125	122.1	5.3	119.54	100.5	102.7	99.7	101.5	101	102.5	96.8	97.5	96.6	101.1
A0A1U7Z231	heat shock 70 kDa protein, mitochondrial-like OS=Nelumbo nucifera OX=4432 GN=LOC104588447 PE=3 SV=1	38	24	54	4	673	72.6	6.1	146.93	95.9	102.4	103.3	94.5	97.8	90.2	98.3	108.3	110.9	98.4
A0A1U8APY8	UDP-glucose 4-epimerase GEPI48 OS=Nelumbo nucifera OX=4432 GN=LOC104606279 PE=3 SV=1	61	18	53	17	348	38.2	7.12	151.41	58.7	60.2	60.4	120.8	117.3	120.2	123.4	122.5	121.2	95.3
A0A1U7ZL27	glutamate-1-semialdehyde 2,1-aminomutase, chloroplastic-like OS=Nelumbo nucifera OX=4432 GN=LOC104591788 PE=3 SV=1	37	13	46	13	472	50.4	6.64	133.9	107	104.3	107.9	96.6	97.6	97.6	96.5	95.6	96.1	100.7
A0A1U8PYP4	Aminomethyltransferase OS=Nelumbo nucifera OX=4432 GN=LOC104588308 PE=3 SV=1	43	15	45	6	407	44.3	8.5	119.12	85.3	84.3	86.9	109.8	106.9	109.1	108.3	105.8	106.7	96.8
A0A1U7ZWJ9	60S ribosomal protein L4-like OS=Nelumbo nucifera OX=4432 GN=LOC104594733 PE=4 SV=1	51	20	62	7	406	44.9	10.42	158.63	111.3	107.2	107.4	89.6	94	88.6	98	101.8	96.5	105.4
A0A1U8BC48	2,3-bisphosphoglycerate-independent phosphoglycerate mutase OS=Nelumbo nucifera OX=4432 GN=LOC104612943 PE=4 SV=1	34	22	70	22	559	61	6	194.14	98.8	96.6	99.6	102.1	101.9	101	100.4	101.1	99	99.5
A0A1U8AG69	Protein disulfide-isomerase OS=Nelumbo nucifera OX=4432 GN=LOC104602626 PE=3 SV=1	39	23	46	23	582	65.3	4.75	121.61	107.3	107	109.1	96.3	93.8	95	98	97.1	95.6	100.8
A0A1U8AEB2	leukotriene A-4 hydrolase homolog isoform X1 OS=Nelumbo nucifera OX=4432 GN=LOC104599338 PE=4 SV=1	40	20	40	20	612	68.9	5.43	113.36	97	98.6	96.8	103.3	102.1	101.4	101.2	98.6	100.2	100.7
A0A1U7Z4K2	Acetyltransferase component of pyruvate dehydrogenase complex OS=Nelumbo nucifera OX=4432 GN=LOC104586674 PE=3 SV=1	40	21	40	13	570	62.3	7.81	116.26	98.6	100.8	98.8	99.6	99.1	99.5	102.5	101.7	99.2	100.2
A0A1U7ZAW7	Elongation factor 1-alpha OS=Nelumbo nucifera OX=4432 GN=LOC104591202 PE=3 SV=1	43	18	146	5	382	42.2	8.48	411.08	117.6	117.6	117.9	93.3	90	89.1	91.6	93.4	89.6	100.1
A0A1U7ZSR4	leucine--tRNA ligase, cytoplasmic-like OS=Nelumbo nucifera OX=4432 GN=LOC104593634 PE=3 SV=1	34	28	45	17	1097	124.7	6.4	96.63	110.1	107.9	108.4	96.9	96.8	98.9	93.3	92.7	94.3	100.7
A0A1U8B7I4	Plasma membrane ATPase OS=Nelumbo nucifera OX=4432 GN=LOC104608053 PE=3 SV=1	34	26	33	7	955	105	6.84	94.28	127.8	126.9	128	88.7	89.9	87.1	80.5	84.5	85.9	100.5
A0A1U8A169	Eukaryotic translation initiation factor 3 subunit A OS=Nelumbo nucifera OX=4432 GN=LOC104599180 PE=3 SV=1	29	24	45	24	960	112.7	9.16	118.89	105	106.6	105.1	97.8	98.1	98.9	97.3	93.6	96.6	101
A0A1U8ANZ3	stress-related protein-like OS=Nelumbo nucifera OX=4432 GN=LOC104606148 PE=4 SV=1	71	14	47	13	243	26.7	5.48	149.36	45.6	46	45.7	121.7	121.7	120.1	136.2	136.2	134.2	92.5
A0A1U8A5E4	carbamoyl-phosphate synthase large chain, chloroplastic-like OS=Nelumbo nucifera OX=4432 GN=LOC104600938 PE=3 SV=1	29	31	52	2	1200	131.2	6.05	122.47	115.5	118.8	115.4	94.8	96.2	95.4	83.6	86.4	93.1	100.9
A0A1U8BB19	Alanine--tRNA ligase OS=Nelumbo nucifera OX=4432 GN=LOC104609139 PE=3 SV=1	30	29	46	29	1038	112.9	6.52	109.76	119.8	117.9	116.7	91.8	92.4	91.2	90.3	90.5	87.7	101.7
A0A1U7ZPZ1	glutamate--tRNA ligase, cytoplasmic OS=Nelumbo nucifera OX=4432 GN=LOC104596688 PE=3 SV=1	41	32	54	32	730	82.6	7.91	119.31	116.2	112.9	114.5	95.9	97.3	98.3	87.6	88.4	87.3	101.6
A0A1U7ZMX6	nucleolin 2-like isoform X1 OS=Nelumbo nucifera OX=4432 GN=LOC104592315 PE=4 SV=1	38	26	48	1	757	79.4	5.45	128.98	6.3	5	7.1	72.9	85.9	77.7	236.6	208.8	219.8	80.1
A0A1U8AUP6	Aconitate hydratase OS=Nelumbo nucifera OX=4432 GN=LOC104604302 PE=3 SV=1	35	26	51	15	900	98.4	6.28	120.26	115	113.3	113.4	93.9	98.8	95.5	89.9	90.3	88.5	101.4
A0A1U8B803	V-type proton ATPase catalytic subunit A-like OS=Nelumbo nucifera OX=4432 GN=LOC104611711 PE=3 SV=1	46	25	47	3	623	68.8	5.59	122.99	109.1	113.3	105.2	92.9	100.9	96.8	90.2	91.1	94.3	106
A0A1U8BNG6	Aminomethyltransferase OS=Nelumbo nucifera OX=4432 GN=LOC104612758 PE=3 SV=1	41	14	45	5	408	44.4	8.62	127.43	84.7	85.7	85.9	108.5	107.7	108.5	109.3	106.4	106.1	97.2
A0A1U7ZU17	elongation factor 1-beta-like OS=Nelumbo nucifera OX=4432 GN=LOC104593619 PE=3 SV=1	50	10	41	7	226	24.6	4.83	122.06	104.3	102.1	106.1	94.8	97.8	100	97.6	99.1	95.9	102.3
A0A1U7Z918	nucleolin 2-like isoform X2 OS=Nelumbo nucifera OX=4432 GN=LOC104592315 PE=4 SV=1	38	26	49	1	756	79.3	5.41	126.83	40	41.4	41.4	96.4	94.1	94.8	172.3	167.5	163.3	88.8
A0A1U8A8L1	Glucose-6-phosphate isomerase OS=Nelumbo nucifera OX=4432 GN=LOC104601885 PE=3 SV=1	43	21	60	9	568	62.6	7.39	165.63	97.4	100.7	100.1	100.9	105.9	103.1	92.4	96.8	96.4	106.3
A0A1U7ZAF2	Pyrophosphate--fructose 6-phosphate 1-phosphotransferase subunit beta OS=Nelumbo nucifera OX=4432 GN=LOC104588051 PE=3 SV=1	42	23	54	10	570	62.6	6.65	115.52	115.2	117.7	119.2	93.6	93.9	93.7	88.6	89.9	88.4	99.9
A0A1U7ZF11	Guanosine nucleotide diphosphate dissociation inhibitor OS=Nelumbo nucifera OX=4432 GN=LOC104593372 PE=3 SV=1	45	19	56	4	444	49.9	5.76	134.27	117.5	113.1	113.5	94.2	99.7	92.6	91	85.9	88.3	104.2
A0A1U8AZ09	valine--tRNA ligase, mitochondrial 1 OS=Nelumbo nucifera OX=4432 GN=LOC104609078 PE=3 SV=1	25	26	40	26	1063	121.5	6.54	98.34	107.5	106	106.1	103.6	97.3	95.1	86.8	89.3	106.6	101.7
A0A1U8AK30	probable protein disulfide-isomerase A6 OS=Nelumbo nucifera OX=4432 GN=LOC104605120 PE=3 SV=1	58	22	46	11	358	39.6	5.87	118.78	100.6	100.6	102.7	99.1	99.2	98.5	101	100	98.8	99.5
A0A1U7YX07	3-ketoacyl-CoA thiolase 2, peroxisomal OS=Nelumbo nucifera OX=4432 GN=LOC104587903 PE=3 SV=1	45	17	35	17	460	48.5	7.61	101.11	128	126.7	130.7	88.4	84.1	88.3	87	82.4	83.1	101.3
A0A1U7ZMI0	Elongation factor Tu OS=Nelumbo nucifera OX=4432 GN=LOC104592208 PE=3 SV=1	52	19	52	18	450	49.2	7.06	119.19	101.1	98.7	99.4	100.5	102.3	102.1	100	98.7	97.1	100.2
A0A1U8A0T1	Xylose isomerase OS=Nelumbo nucifera OX=4432 GN=LOC104599094 PE=3 SV=1	45	19	49	19	515	57.7	6	119.43	97.9	99.5	97.1	101	98.5	101.4	100.3	102.7	101.8	99.7
A0A1U8BD80	Guanosine nucleotide diphosphate dissociation inhibitor OS=Nelumbo nucifera OX=4432 GN=LOC104612208 PE=3 SV=1	49	21	53	6	444	49.9	5.74	118.56	118	118	118	91.8	91.5	93.8	89.4	89.7	88.1	101.7
A0A1U8BNQ3	Malate dehydrogenase OS=Nelumbo nucifera OX=4432 GN=LOC104613084 PE=3 SV=1	40	12	41	5	351	36.8	8.76	121.97	102.1	100.6	101.2	101.7	97.5	99.6	106.3	98.4	94.6	98
A0A1U7ZI45	carbamoyl-phosphate synthase large chain, chloroplastic-like OS=Nelumbo nucifera OX=4432 GN=LOC104594765 PE=3 SV=1	32	33	51	3	1200	131.2	5.95	119.04	117.7	116.4	116.2	92.8	93.7	91.7	87.7	89.6	88.4	105.7
A0A1U8B581	26S proteasome non-ATPase regulatory subunit 2 homolog OS=Nelumbo nucifera OX=4432 GN=LOC104609868 PE=3 SV=1	34	28	40	9	912	100	5.14	106.98	110.5	111.6	113.1	96.8	97	95.8	92.2	91.2	91.3	100.3
A0A1U7ZCQ0	26S proteasome regulatory subunit 4 homolog A OS=Nelumbo nucifera OX=4432 GN=LOC104589149 PE=3 SV=1	56	22	42	22	445	49.5	6.33	95.01	107.7	107.2	109.7	98.9	94.7	98.1	94.8	94.5	94.7	99.7
A0A1U7ZC33	uncharacterized protein LOC104588560 OS=Nelumbo nucifera OX=4432 GN=LOC104588560 PE=4 SV=1	36	20	52	20	543	58.3	8.6	146.28	70.8	71.7	72.1	116.5	115.6	115.6	115.6	114.9	111.5	95.8
A0A1U8BDJ4	Tubulin beta chain OS=Nelumbo nucifera OX=4432 GN=LOC104609964 PE=3 SV=1	44	15	58	2	449	50.4	4.87	134.45	125.9	127.6	125.7	85.6	87	92	84.4	84.1	83.2	104.4
A0A1U8ARK1	Polyadenylate-binding protein OS=Nelumbo nucifera OX=4432 GN=LOC104606838 PE=3 SV=1	41	20	37	14	654	71.3	7.36	92.21	110.8	107.6	114	92.7	99	94.6	93.9	92.3	95.9	99.1
A0A1U7Z1J2	aspartic proteinase A1-like isoform X1 OS=Nelumbo nucifera OX=4432 GN=LOC104588302 PE=3 SV=1	40	16	57	14	517	56.1	5.43	141.78	91.3	90.7	91.4	105.3	104.6	105.1	105.4	104.2	103.7	98.5
A0A1U8ABZ3	luminal-binding protein 4-like OS=Nelumbo nucifera OX=4432 GN=LOC104598993 PE=3 SV=1	32	18	74	8	661	73.1	5.25	207.78	93.2	93.7	97.3	99.4	111.7	105.5	100.1	105.4	96.2	97.6
A0A1U8AK42	Starch synthase, chloroplastic/amyloplastic OS=Nelumbo nucifera OX=4432 GN=LOC104604810 PE=3 SV=1	33	17	38	14	649	71.9	7.31	106.06	77.4	78.5	78.4	113.1	111.6	112.2	110.1	110.5	110.2	98.1
A0A1U8BGE7	26S protease regulatory subunit 6A homolog OS=Nelumbo nucifera OX=4432 GN=LOC104610843 PE=3 SV=1	62	23	48	8	423	47.4	5.11	121.04	108.3	109.7	110	98.3	96.3	95.4	93.5	91.5	97.7	99.3
A0A1U8BPH7	T-complex protein 1 subunit delta OS=Nelumbo nucifera OX=4432 GN=LOC104613329 PE=3 SV=1	45	21	37	3	535	57.9	7.85	108.74	105.2	106.2	108	95.1	92.3	90.6	97.3	98.2	99.9	107.2
A0A1U8ARF7	leucine aminopeptidase 2, chloroplastic-like OS=Nelumbo nucifera OX=4432 GN=LOC104603286 PE=3 SV=1	47	18	36	10	528	55	5.99	101.28	106.5	110.7	103.6	97.7	91.7	95.5	101.8	92.8	98.9	100.8
A0A1U7Z3E0	uncharacterized protein LOC104590675 isoform X1 OS=Nelumbo nucifera OX=4432 GN=LOC104590675 PE=4 SV=1	36	27	38	27	827	92.7	4.53	80.14	100.5	100.2	99.5	105.1	104.7	104.5	93.3	94.5	94.9	102.8
A0A1U7Z7V2	40S ribosomal protein S4 OS=Nelumbo nucifera OX=4432 GN=LOC104587244 PE=3 SV=1	57	16	63	2	265	29.8	10.23	159.24	105.4	106.3	107	94.6	95.8	94.1	99.4	98.1	97.8	101.5
A0A1U7ZTI6	Tubulin alpha chain OS=Nelumbo nucifera OX=4432 GN=LOC104597659 PE=3 SV=1	53	20	72	8	449	49.7	5.06	173.44	110	106.9	107.5	99.9	98.8	97.2	93.4	92.9	90.3	103.1
A0A1U7Z2T7	carbamoyl-phosphate synthase large chain, chloroplastic-like OS=Nelumbo nucifera OX=4432 GN=LOC104588652 PE=3 SV=1	30	31	48	3	1198	130.5	5.48	109.37	117.5	126.8	117.7	89.9	83.6	89.6	91.8	92.5	88	102.6
A0A1U8B6X4	40S ribosomal protein S4 OS=Nelumbo nucifera OX=4432 GN=LOC104611414 PE=3 SV=1	57	16	64	3	267	30	10.23	159.99	99.3	110.4	103.6	97.7	98.7	104.1	89.2	96.4	95.6	105
A0A1U8B243	Biotin carboxylase OS=Nelumbo nucifera OX=4432 GN=LOC104606258 PE=4 SV=1	46	19	40	19	533	58.3	7.06	113.42	156.3	159.7	157.5	75	76.3	76	62.3	66.9	65	105.1
A0A1U8B8Y1	Aconitate hydratase OS=Nelumbo nucifera OX=4432 GN=LOC104610937 PE=3 SV=1	33	28	51	8	992	108	7.24	107.44	107.5	105.5	107.1	99.4	98.4	98.2	93.6	94.3	92.3	103.7
A0A1U8A986	T-complex protein 1 subunit zeta 1-like OS=Nelumbo nucifera OX=4432 GN=LOC104601564 PE=3 SV=1	52	22	56	4	535	59.2	6.25	121.49	112.2	106.6	108.2	97.5	97.2	99.4	94.3	88.7	95.1	100.9
A0A1U8Q594	11S globulin subunit beta-like OS=Nelumbo nucifera OX=4432 GN=LOC104601507 PE=4 SV=1	32	14	75	4	559	62.6	7.09	202.93	101.8	102.8	99.1	87.7	86.8	86.7	111.4	112.9	109.2	101.6
A0A1U8AH10	16.9 kDa class I heat shock protein 1-like OS=Nelumbo nucifera OX=4432 GN=LOC104600167 PE=3 SV=1	76	15	131	14	157	17.9	6.6	286.93	50	51.2	50.8	126.9	123.6	125	128.2	123.3	126.6	94.4
A0A1U7ZQE8	T-complex protein 1 subunit epsilon OS=Nelumbo nucifera OX=4432 GN=LOC104593014 PE=3 SV=1	46	21	50	9	535	59	5.57	126.3	96.1	98.5	98.1	99	100.1	106.8	99	97.5	104.2	100.8
A0A1U8B4V7	KH domain-containing protein At4g18375 OS=Nelumbo nucifera OX=4432 GN=LOC104610791 PE=4 SV=1	51	23	39	18	627	66.7	6.68	92.66	106.9	106	106.6	97.3	99.5	99.6	92.6	95.8	93.4	102.1
A0A1U7ZZT7	Importin subunit alpha OS=Nelumbo nucifera OX=4432 GN=LOC104598848 PE=3 SV=1	58	21	47	19	529	58.5	5.44	114.34	100	102.4	97.7	99.5	107.1	101	96.9	96.2	97	102.2
A0A1U7ZG19	ankyrin repeat domain-containing protein 2A-like OS=Nelumbo nucifera OX=4432 GN=LOC104592662 PE=4 SV=1	55	13	45	13	352	37.6	4.51	104.04	112.6	111.5	112.9	94.6	96.7	95.7	89.2	92	90.6	104.1
A0A1U7ZZD0	Aspartate aminotransferase OS=Nelumbo nucifera OX=4432 GN=LOC104595171 PE=4 SV=1	49	20	52	12	461	50.2	8.16	119.45	103.4	106.1	104.3	96.5	98.4	99.1	95.7	99.5	96.4	100.7
A0A1U7Z1V9	long chain acyl-CoA synthetase 8 OS=Nelumbo nucifera OX=4432 GN=LOC104585846 PE=4 SV=1	37	20	44	19	727	79.7	8.1	90.72	90.6	93.3	91.1	106.9	108.4	108.3	99.8	100.1	100.1	101.4
A0A1U7YQ90	chaperonin CPN60-like 2, mitochondrial OS=Nelumbo nucifera OX=4432 GN=LOC104586635 PE=3 SV=1	44	21	52	16	574	61	6.4	133.74	91.3	92.3	94.7	106	101.2	102.6	105.9	101.9	102.9	101.2
A0A1U7ZUS8	chaperone protein ClpB3, chloroplastic OS=Nelumbo nucifera OX=4432 GN=LOC104598003 PE=3 SV=1	36	32	43	28	978	110.2	6.99	88.03	98.6	98.5	98.9	106.8	106.2	106.4	96.3	94.6	92.8	100.9
A0A1U8B4F3	chaperone protein ClpB3, mitochondrial OS=Nelumbo nucifera OX=4432 GN=LOC104610707 PE=3 SV=1	29	24	34	19	992	111	7.02	80.99	91.8	94.4	87.8	105.9	106.3	108.5	99.9	101.6	102.6	101.2
A0A1U7Z8U8	UTP--glucose-1-phosphate uridylyltransferase OS=Nelumbo nucifera OX=4432 GN=LOC104590451 PE=3 SV=1	41	15	49	5	475	52.2	5.57	130.41	117.4	115.9	116.4	92.2	94.5	91.6	92.4	91.6	90.4	97.6
A0A1U8APS2	peroxygenase-like OS=Nelumbo nucifera OX=4432 GN=LOC104602791 PE=4 SV=1	41	10	67	10	238	26.7	6.89	178.76	61.8	63.1	61.8	118.2	120.5	120.7	122	118.9	117.8	95.2
A0A1U8AC34	dolichyl-diphosphooligosaccharide--protein glycosyltransferase subunit 2-like OS=Nelumbo nucifera OX=4432 GN=LOC104602859 PE=4 SV=1	35	19	39	17	689	75.3	6.06	98.38	109.9	111	109.3	94	96.5	95.1	92.6	93.7	93.2	104.7
A0A1U7ZQC6	Aspartate aminotransferase OS=Nelumbo nucifera OX=4432 GN=LOC104592600 PE=4 SV=1	52	20	45	12	424	46.4	7.33	118.98	111.2	110.3	112.8	92.5	94.2	95.5	94.7	96.2	92.1	100.6
A0A1U8BF31	elongation factor 1-delta-like OS=Nelumbo nucifera OX=4432 GN=LOC104610217 PE=3 SV=1	55	12	70	3	232	25.4	4.6	170.14	110.1	105.6	105.9	95.8	98	92.3	103.7	94.8	91.2	102.7
A0A1U7Z8W7	N-alpha-acetyltransferase 16, NatA auxiliary subunit OS=Nelumbo nucifera OX=4432 GN=LOC104592287 PE=4 SV=1	34	29	42	16	888	101.4	7.02	99.39	107.5	108	105.4	99.3	100.7	99.2	92.9	93.6	91.9	101.5
A0A1U8AJY9	glutelin type-A 1-like OS=Nelumbo nucifera OX=4432 GN=LOC104601272 PE=4 SV=1	42	17	42	17	356	38.5	6.09	105.79	111.6	112.9	110.7	93.5	92.3	94	95.3	95	93.3	101.3
A0A1U8Q2B9	acetyl-CoA acetyltransferase, cytosolic 1 OS=Nelumbo nucifera OX=4432 GN=LOC104594265 PE=3 SV=1	47	13	30	8	406	41.5	6.89	92.5	148.9	142.7	151.5	81	81.2	79.8	69.2	72.9	70.6	102.2
A0A1U8ANN8	triosephosphate isomerase, cytosolic OS=Nelumbo nucifera OX=4432 GN=LOC104602457 PE=3 SV=1	54	11	84	6	253	27.2	5.92	189.19	109.8	108.7	108.5	98.3	96.7	97.9	92.8	92.7	93.9	100.8
A0A1U7Z3K1	isoleucine--tRNA ligase, cytoplasmic OS=Nelumbo nucifera OX=4432 GN=LOC104589945 PE=3 SV=1	37	37	52	37	1132	129.1	6.73	112.65	108.2	108.3	106.3	98.1	98.7	98.8	92.6	92.3	94.4	102.3
A0A1U8QCL5	GDP-mannose 3,5-epimerase 2 OS=Nelumbo nucifera OX=4432 GN=LOC104613267 PE=4 SV=1	46	18	42	8	376	42.5	6.34	123.18	124	123	125.6	92.9	93.2	92.1	81.6	83.1	83	101.5
A0A1U8AVB8	betaine aldehyde dehydrogenase 1, chloroplastic-like OS=Nelumbo nucifera OX=4432 GN=LOC104607975 PE=3 SV=1	47	15	34	15	506	55.4	5.73	95.75	132.6	134.6	132.1	82.2	83.8	83.2	85.4	82	81.8	102.5
A0A1U8A7N7	KH domain-containing protein At4g18375-like isoform X1 OS=Nelumbo nucifera OX=4432 GN=LOC104597880 PE=4 SV=1	38	20	48	16	565	60.7	6.43	129.21	104.7	104.6	103.4	97	97.7	98.7	98.8	96.7	98.9	99.4
A0A1U7ZDN6	brefeldin A-inhibited guanine nucleotide-exchange protein 5 isoform X1 OS=Nelumbo nucifera OX=4432 GN=LOC104589434 PE=4 SV=1	21	33	42	33	1857	206.1	5.96	96.97	125.1	123.6	125.3	89.7	93	90.6	81.7	83.6	84.3	103.2
A0A1U7YYB3	protein EXPORTIN 1A OS=Nelumbo nucifera OX=4432 GN=LOC104587254 PE=4 SV=1	24	26	43	6	1074	123.8	5.57	88.05	96.2	98.7	102.2	107.2	108.9	100.1	92.5	98.2	90.9	105.3
A0A1U8BG54	Ribulose bisphosphate carboxylase small chain OS=Nelumbo nucifera OX=4432 GN=LOC104610551 PE=3 SV=1	63	12	66	12	180	20.4	9	181.59	81.7	83.7	84.2	106.6	105.2	104.4	110.9	111.1	113.7	98.4
A0A1U8B7J1	Chlorophyll a-b binding protein, chloroplastic OS=Nelumbo nucifera OX=4432 GN=LOC104610563 PE=3 SV=1	65	11	103	10	271	29.3	5.66	229.33	77.7	77.7	77.8	110.8	110.3	112.3	110.5	109.8	115.3	97.9
A0A1U8B954	protein TIC110, chloroplastic-like OS=Nelumbo nucifera OX=4432 GN=LOC104612083 PE=4 SV=1	26	24	39	11	1082	119.4	6.14	87.84	94.8	98.9	100.2	102.3	100.7	97.9	100.4	98.8	101.8	104.2
A0A1U7YMY6	40S ribosomal protein S2-3-like OS=Nelumbo nucifera OX=4432 GN=LOC104585901 PE=3 SV=1	51	16	57	4	276	30.1	10.37	133.37	103.1	102.2	107.5	95.5	96.3	99.7	102.1	99.1	93.2	101.3
A0A1U8ARY5	Glyceraldehyde-3-phosphate dehydrogenase OS=Nelumbo nucifera OX=4432 GN=LOC104606825 PE=3 SV=1	49	21	42	17	452	48	7.91	103.84	100.7	101.5	98.7	101.5	102	101.3	97	97.5	99.5	100.2
A0A1U7YZS9	elongation factor 1-delta-like OS=Nelumbo nucifera OX=4432 GN=LOC104588784 PE=3 SV=1	45	12	69	3	231	25.3	4.7	166.36	101.1	102.2	105.8	98.8	98	99.1	100.3	99.5	96.1	99.1
A0A1U7ZY20	peroxisomal fatty acid beta-oxidation multifunctional protein AIM1 OS=Nelumbo nucifera OX=4432 GN=LOC104595160 PE=3 SV=1	30	19	39	19	727	78.7	9.35	96.85	121	118.6	120.6	95.1	90.6	91.1	88.3	87.8	85	102
A0A1U7ZLH7	protein disulfide isomerase-like 2-3 OS=Nelumbo nucifera OX=4432 GN=LOC104594122 PE=3 SV=1	38	15	38	12	434	47.4	5.48	106.21	105.9	105.8	106.4	99.1	95.5	96.7	99.4	97.2	94.2	99.9
A0A1U7ZIX9	legumin B-like OS=Nelumbo nucifera OX=4432 GN=LOC104594450 PE=4 SV=1	35	13	60	5	374	42.2	6.29	165.38	89.3	89.3	88.8	91.1	92.1	92.4	118.6	121.7	117.7	99.2
A0A1U7ZDJ2	protein argonaute 4A OS=Nelumbo nucifera OX=4432 GN=LOC104593507 PE=4 SV=1	26	23	42	23	921	103.3	8.84	95.09	114.5	114.9	113.4	92.5	91.9	91.8	91.4	94	93.5	102.2
A0A1U8BAZ8	bifunctional aspartokinase/homoserine dehydrogenase 1, chloroplastic-like OS=Nelumbo nucifera OX=4432 GN=LOC104609119 PE=4 SV=1	34	28	37	25	927	101.6	7.34	85.13	99.7	110.9	99	101.6	103.2	100.6	94.1	90.7	98.6	101.6
A0A1U8B2E2	2-isopropylmalate synthase A-like OS=Nelumbo nucifera OX=4432 GN=LOC104610141 PE=3 SV=1	37	20	36	20	613	66.3	6.44	92.67	120.2	122.6	119.4	86.1	86.2	86.5	93.1	91.8	87.5	106.6
A0A1U8BIA5	protein EXPORTIN 1A OS=Nelumbo nucifera OX=4432 GN=LOC104611416 PE=4 SV=1	23	27	42	7	1076	123.6	5.66	89.57	98.9	100.7	102	100.3	101.7	102.1	97.7	96.2	99.4	101.1
A0A1U7YYC2	40S ribosomal protein S4 OS=Nelumbo nucifera OX=4432 GN=LOC104587260 PE=3 SV=1	52	14	61	2	264	29.7	10.23	155.63	96.8	92.9	91.6	93.4	99.6	97.8	108.9	106.6	111.5	100.9
A0A1U8AME2	26S protease regulatory subunit 7 OS=Nelumbo nucifera OX=4432 GN=LOC104605798 PE=3 SV=1	60	24	42	24	425	47.5	6.29	96.4	114.2	114.9	115.6	93.7	91.9	95.3	92.3	90.1	89.6	102.4
A0A1U8AN29	transketolase, chloroplastic OS=Nelumbo nucifera OX=4432 GN=LOC104602251 PE=4 SV=1	28	18	38	5	747	80.3	6.68	102.06	110.6	108.7	107.7	94.4	95.7	94.4	94.7	95.6	94.8	103.4
A0A1U8BBQ5	Cysteine synthase OS=Nelumbo nucifera OX=4432 GN=LOC104611726 PE=3 SV=1	55	13	43	9	325	34.5	5.63	102.4	112.2	111.8	113.4	92.9	93.6	94.4	93.8	95	92.2	100.6
A0A1U7Z129	arginine--tRNA ligase, cytoplasmic-like isoform X1 OS=Nelumbo nucifera OX=4432 GN=LOC104588161 PE=3 SV=1	43	24	36	24	645	72.5	7.69	83.03	112	112.4	112.3	95.3	95	95.7	90.2	92.3	91.5	103.4
A0A1U7Z341	Adenosylhomocysteinase OS=Nelumbo nucifera OX=4432 GN=LOC104590561 PE=3 SV=1	32	14	71	1	485	53.1	6.19	181.69	81.2	81.6	81.7	102.2	121.1	106.6	94.3	116.2	110.9	104.2
A0A1U8BPQ2	protein transport protein SEC31 homolog B-like OS=Nelumbo nucifera OX=4432 GN=LOC104613418 PE=4 SV=1	22	21	35	11	1129	122.3	5.34	89.26	117.4	115.5	117.8	92.1	94	93.8	89.8	88.6	85.7	105.5
A0A1U8AQ56	villin-2 OS=Nelumbo nucifera OX=4432 GN=LOC104606330 PE=4 SV=1	26	23	38	20	946	104.1	6.3	83.79	116.3	117.5	113.3	94	93	93.4	89.3	91.2	89.4	102.6
A0A1U8BBF0	Aconitate hydratase OS=Nelumbo nucifera OX=4432 GN=LOC104612799 PE=3 SV=1	32	26	45	8	997	109	7.18	94.87	106.3	103.8	106.2	94.6	100.7	96.3	96.2	95	96.2	104.6
A0A1U8ARL9	aminoacylase-1 OS=Nelumbo nucifera OX=4432 GN=LOC104606852 PE=4 SV=1	64	19	49	19	450	50.2	6.48	93.57	94.9	95.5	96.1	104.3	104	105.6	102.2	99	100.4	98.1
A0A1U7ZK64	T-complex protein 1 subunit epsilon OS=Nelumbo nucifera OX=4432 GN=LOC104591565 PE=3 SV=1	43	21	47	9	535	59	5.67	122.27	109.5	108.1	110.8	96.1	97.1	97.2	94.5	92.3	92.9	101.4
A0A1U8A7B8	phosphoenolpyruvate carboxylase 4-like OS=Nelumbo nucifera OX=4432 GN=LOC104600964 PE=3 SV=1	27	29	39	29	1063	119.8	6.49	94.36	112.7	110.2	113.8	94.6	97	95.4	89.7	91.9	91.5	103.2
A0A1U7ZNY9	Coatomer subunit beta' OS=Nelumbo nucifera OX=4432 GN=LOC104592256 PE=3 SV=1	25	19	36	5	905	102	5.1	96.41	133.6	137.9	135.1	83.3	83.7	82	82.2	80.3	80.2	101.7
A0A1U8AFC0	probable ATP synthase 24 kDa subunit, mitochondrial OS=Nelumbo nucifera OX=4432 GN=LOC104599984 PE=4 SV=1	59	19	57	6	243	27.9	9.11	105.02	89.3	92.8	92.9	104.8	106.6	107.5	100.3	104.8	102.2	99.1
A0A1U8PZN8	11S globulin subunit beta-like OS=Nelumbo nucifera OX=4432 GN=LOC104590224 PE=4 SV=1	29	15	91	6	512	57.9	6.9	232.84	102.9	102.8	103.5	82.5	80	80.7	118.4	117.2	115.2	96.7
A0A1U8A7H4	Peroxidase OS=Nelumbo nucifera OX=4432 GN=LOC104599952 PE=3 SV=1	40	14	90	8	372	40	7.31	326.88	104.9	99.2	103.3	95	88.8	93	109.6	106.4	102.7	97.1
A0A1U8BJM1	delta(24)-sterol reductase OS=Nelumbo nucifera OX=4432 GN=LOC104611785 PE=4 SV=1	33	23	40	23	563	65.8	8.27	96.32	113.1	109.7	111.8	96.5	93.7	95.8	91.2	94.4	92.6	101
A0A1U7Z2S6	pre-mRNA-processing-splicing factor 8A OS=Nelumbo nucifera OX=4432 GN=LOC104586121 PE=4 SV=1	18	35	43	35	2354	275.1	8.79	81.89	102.7	104.6	103.7	100.5	100.7	101.2	93.2	95.7	95.6	102
A0A1U8B9J0	uncharacterized protein LOC104612204 OS=Nelumbo nucifera OX=4432 GN=LOC104612204 PE=4 SV=1	45	15	55	15	319	35.3	4.86	114.64	117	113.6	115.8	94.9	94.2	95.2	89.5	90.6	89.2	100
A0A1U7Z4E1	non-symbiotic hemoglobin 2-like OS=Nelumbo nucifera OX=4432 GN=LOC104586188 PE=3 SV=1	73	14	38	14	165	18.5	5.64	106.76	131.7	127.3	130.2	84	84	82.5	86.3	84.4	88.3	101.2
A0A1U7ZYC4	Coatomer subunit beta' OS=Nelumbo nucifera OX=4432 GN=LOC104595238 PE=3 SV=1	25	19	37	5	909	102.6	5.14	93.37	116.1	116.9	116.7	87.1	103.5	94.7	80.6	86.1	96	102.4
A0A1U8A8E3	splicing factor 3B subunit 1 OS=Nelumbo nucifera OX=4432 GN=LOC104598042 PE=4 SV=1	22	23	36	23	1275	142.4	6	80.3	101.4	101.9	100.5	99.9	98.5	103.2	97.7	98.5	97.4	101
A0A1U8AMP6	DEAD-box ATP-dependent RNA helicase 38 OS=Nelumbo nucifera OX=4432 GN=LOC104604617 PE=4 SV=1	50	21	38	21	493	55	6.11	92.88	85.6	89.6	87.4	108.2	106	107.1	105.9	105.8	105.7	98.7
A0A1U7YUJ1	alcohol dehydrogenase 1 OS=Nelumbo nucifera OX=4432 GN=LOC104587949 PE=3 SV=1	53	14	64	4	380	41.2	6.33	132.2	101.6	103.6	106.2	109.8	112.6	106.5	86.4	90.9	92.3	90.2
A0A1U8B9Z0	legumin B-like OS=Nelumbo nucifera OX=4432 GN=LOC104608549 PE=4 SV=1	34	13	45	13	500	56.5	6.29	119.05	82.8	82.4	82.7	84	84.9	85	137.4	133.4	132.7	94.7
A0A1U7Z1L7	T-complex protein 1 subunit alpha-like OS=Nelumbo nucifera OX=4432 GN=LOC104590079 PE=3 SV=1	33	16	40	2	546	59.1	6	99.43	103.9	110.9	93.7	101	87.2	115.8	92.6	105.1	77.9	111.8
A0A1U8B987	Glyceraldehyde-3-phosphate dehydrogenase OS=Nelumbo nucifera OX=4432 GN=LOC104611012 PE=3 SV=1	54	18	51	16	430	45.9	8.51	109.35	94	92.6	93.7	104.4	103.3	103.9	101.7	104.5	101.9	100
A0A1U7ZK76	uncharacterized protein LOC104591570 OS=Nelumbo nucifera OX=4432 GN=LOC104591570 PE=4 SV=1	31	18	36	7	713	78.5	5.11	86.24	118.5	112.7	110.5	103	89.7	90.6	94	87.4	92.3	101.3
A0A1U7ZD73	NADPH-protochlorophyllide oxidoreductase OS=Nelumbo nucifera OX=4432 GN=LOC104588887 PE=3 SV=1	40	16	51	7	400	43.2	9.14	145.01	165.7	167	165.6	62.9	60.7	60.2	72	72.3	71.4	102.2
A0A1U7ZPU9	adenosine kinase 2 OS=Nelumbo nucifera OX=4432 GN=LOC104595053 PE=4 SV=1	35	10	41	10	341	37.6	5.35	108.08	108.7	108.4	109.5	96.1	98.8	98	91.3	95.6	90.6	103
A0A1U7YR89	probable phosphoribosylformylglycinamidine synthase, chloroplastic/mitochondrial OS=Nelumbo nucifera OX=4432 GN=LOC104586958 PE=3 SV=1	21	27	36	27	1412	154.6	5.6	85.51	103.9	102.5	102.3	99.5	101	100	98	96.7	97.4	98.7
A0A1U8B765	transketolase, chloroplastic OS=Nelumbo nucifera OX=4432 GN=LOC104611478 PE=4 SV=1	27	18	33	5	744	80.1	6.65	85.95	115.5	113.3	115.2	93.6	93.5	92.6	92.7	91.9	92.3	99.4
A0A1U8ATX9	14-3-3-like protein GF14 kappa OS=Nelumbo nucifera OX=4432 GN=LOC104603864 PE=3 SV=1	68	17	37	5	249	28	4.91	99.51	108.6	116.5	106.1	95.6	100.1	97.7	84.5	92.2	99.6	98.9
A0A1U8A9T1	FAM10 family protein At4g22670-like OS=Nelumbo nucifera OX=4432 GN=LOC104602267 PE=4 SV=1	50	20	41	7	386	42.2	5.5	102.91	101.1	99	102.6	101.8	100.7	101.9	97.9	99.6	96.7	98.6
A0A1U8AT25	Dolichyl-diphosphooligosaccharide--protein glycosyltransferase subunit 1 OS=Nelumbo nucifera OX=4432 GN=LOC104603798 PE=3 SV=1	36	23	33	22	609	68.6	8.27	79.44	108.4	109.9	109.8	97.4	98	97.3	93.9	93.7	90.2	101.6
A0A1U7ZSZ0	2-alkenal reductase (NADP(+)-dependent)-like OS=Nelumbo nucifera OX=4432 GN=LOC104593340 PE=4 SV=1	45	15	45	8	348	38.4	7.14	115.28	78.7	77.2	79.2	111.9	111.3	112.3	110.2	113.3	108.7	97.3
A0A1U8BLB1	Malate dehydrogenase OS=Nelumbo nucifera OX=4432 GN=LOC104612123 PE=3 SV=1	47	14	36	7	350	36.6	8.46	98.79	97.7	97	100.7	102.5	102.3	101	102.1	100.7	97.6	98.5
A0A1U8B9C0	Ketol-acid reductoisomerase OS=Nelumbo nucifera OX=4432 GN=LOC104612146 PE=3 SV=1	33	14	38	6	586	63.7	6.7	105.85	118.1	115.2	116.4	91.2	92.2	92.3	91.6	93.1	88.5	101.4
A0A1U8A5N5	20 kDa chaperonin, chloroplastic-like OS=Nelumbo nucifera OX=4432 GN=LOC104600496 PE=3 SV=1	61	12	40	7	254	26.8	8.69	130.85	114.8	112	115	95.4	95.6	94.1	90.4	91.1	89.8	101.6
A0A1U8BKV2	proline--tRNA ligase, cytoplasmic-like OS=Nelumbo nucifera OX=4432 GN=LOC104612218 PE=3 SV=1	44	17	37	17	510	58.1	6.98	83.4	106.5	104.3	106.2	95.2	98.3	97.4	98.9	97.7	94.7	100.8
A0A1U8B5V4	Lysine--tRNA ligase OS=Nelumbo nucifera OX=4432 GN=LOC104611066 PE=3 SV=1	31	23	40	23	640	72.2	6.37	95.75	104.8	102.8	105.1	99	100.4	99.8	94.8	96.7	96	100.7
A0A1U7ZMS8	E3 ubiquitin-protein ligase UPL2-like isoform X1 OS=Nelumbo nucifera OX=4432 GN=LOC104595538 PE=4 SV=1	9	31	33	19	3670	404.2	5.33	69.01	89.3	91.4	90.3	99.6	102.6	103.3	109.6	107.3	107.1	99.5
A0A1U8AUI8	FRIGIDA-like protein OS=Nelumbo nucifera OX=4432 GN=LOC104607611 PE=3 SV=1	43	21	38	21	617	68.4	5.14	74.07	106	107.5	103.8	98.8	98.8	100.5	94.5	94.4	93.4	102.2
A0A1U7ZXK2	ATP-citrate synthase beta chain protein 2 isoform X1 OS=Nelumbo nucifera OX=4432 GN=LOC104598755 PE=4 SV=1	37	19	43	4	608	66	7.66	104.98	104.6	105	100.6	104.5	100.1	104.9	85.9	93.8	98.1	102.7
A0A1U8AXF9	14-3-3-like protein GF14 kappa OS=Nelumbo nucifera OX=4432 GN=LOC104608604 PE=3 SV=1	67	17	36	5	252	28.3	4.91	101.04	120.9	121.9	125.4	93.9	92.7	95.1	80.9	84.8	82.3	102.1
A0A1U7ZDA0	Obg-like ATPase 1 OS=Nelumbo nucifera OX=4432 GN=LOC104588919 PE=3 SV=1	47	19	38	19	394	44.5	7.03	101.64	100.8	100.8	102.7	99.4	105.9	100	94.6	97.9	97.5	100.5
A0A1U8AFZ4	uncharacterized protein LOC104602549 OS=Nelumbo nucifera OX=4432 GN=LOC104602549 PE=4 SV=1	51	10	53	10	167	18.3	5.39	129.36	43.2	44.4	44	117.6	118.2	119.8	141.1	139.1	140.9	91.6
A0A1U7Z3F9	oil body-associated protein 1B-like isoform X2 OS=Nelumbo nucifera OX=4432 GN=LOC104590681 PE=4 SV=1	45	10	98	10	234	26.1	6.05	160.66	86.9	85.4	86.8	111	107.7	107.4	105.9	108.2	104.1	96.7
A0A1U7Z2R2	patellin-3-like OS=Nelumbo nucifera OX=4432 GN=LOC104588624 PE=4 SV=1	40	18	27	13	578	64.4	4.74	80.14	118.1	117.3	119.2	93.9	94.2	94.3	86.9	85.7	88.2	102.2
A0A1U8BD61	GDP-mannose 3,5-epimerase 2 OS=Nelumbo nucifera OX=4432 GN=LOC104609581 PE=4 SV=1	43	15	46	5	376	42.4	6.34	129.4	137.3	136.6	135.8	82.9	83.7	83.3	80.9	77	79.4	103.2
A0A1U8BJ05	FAM10 family protein At4g22670-like OS=Nelumbo nucifera OX=4432 GN=LOC104611582 PE=4 SV=1	44	18	39	5	395	42.9	5.36	99.92	89.8	91.4	83.1	101.7	107.9	103.2	103.5	108.1	106.1	105.2
A0A1U8AG42	T-complex protein 1 subunit eta OS=Nelumbo nucifera OX=4432 GN=LOC104603661 PE=3 SV=1	44	20	34	8	563	60.7	6.25	86.64	104.7	102.8	108.4	97	103	101.3	93.1	90.5	101.1	98.3
A0A1U8A4X5	protein TOC75-3, chloroplastic OS=Nelumbo nucifera OX=4432 GN=LOC104597138 PE=4 SV=1	32	19	30	19	824	90.3	8.46	69.14	98.5	100	98.1	100	100.9	99.7	101.6	100.2	98.8	102.4
A0A1U7ZYR2	pyruvate decarboxylase 2-like OS=Nelumbo nucifera OX=4432 GN=LOC104594948 PE=3 SV=1	31	17	59	12	605	65.1	5.72	141.64	93.8	93.8	94.2	99.4	105.6	100.4	103.9	105.3	104.5	98.9
A0A1U8AMY4	inositol-3-phosphate synthase-like OS=Nelumbo nucifera OX=4432 GN=LOC104605929 PE=4 SV=1	38	16	39	6	510	56.4	5.9	93.37	171	166.1	171.1	68	68.6	68.4	59.9	61.3	60.1	105.5
A0A1U8AJC1	Malate dehydrogenase OS=Nelumbo nucifera OX=4432 GN=LOC104600872 PE=3 SV=1	55	17	42	6	332	35.8	6.64	113.44	109.2	108.7	110.2	96.8	96.2	97.5	92.9	93.6	94.2	100.8
A0A1U7YZX5	guanine nucleotide-binding protein subunit beta-like protein OS=Nelumbo nucifera OX=4432 GN=LOC104587768 PE=4 SV=1	51	14	46	2	314	34.7	7.69	122.08	107.3	107.2	107.6	98.3	99.8	95.4	94.8	96.8	93.4	99.4
A0A1U8B035	40S ribosomal protein S3-3-like OS=Nelumbo nucifera OX=4432 GN=LOC104609344 PE=3 SV=1	67	16	70	2	234	26.1	9.5	154.95	101.9	102.7	100.3	94.1	102.8	96.5	88.5	99.7	105.4	108.3
A0A1U7Z5L9	alpha-glucan water dikinase, chloroplastic isoform X1 OS=Nelumbo nucifera OX=4432 GN=LOC104591440 PE=4 SV=1	18	24	32	24	1464	164.7	7.52	77.49	67.1	66.9	67.8	117.7	116.9	119	117.1	117.1	115.1	95.3
A0A1U8AK72	Annexin OS=Nelumbo nucifera OX=4432 GN=LOC104605150 PE=3 SV=1	51	17	41	16	316	36.1	7.88	112.13	108.2	106.2	106.1	99.1	98.3	96.9	96.3	95.1	92.7	101.1
A0A1U8AHB0	alpha-xylosidase 1-like OS=Nelumbo nucifera OX=4432 GN=LOC104602975 PE=3 SV=1	22	19	43	13	930	103.6	7.17	95.97	112.5	109.3	110.4	100.4	97.6	98.1	90.2	93	88.7	100
A0A1U8Q9K7	uncharacterized protein LOC104608951 isoform X2 OS=Nelumbo nucifera OX=4432 GN=LOC104608951 PE=4 SV=1	56	11	28	11	314	33.4	4.44	92.62	88.6	86.5	90.7	106.8	104.7	105.8	103	104.4	110	99.5
A0A1U8ARC5	probable ATP synthase 24 kDa subunit, mitochondrial OS=Nelumbo nucifera OX=4432 GN=LOC104603256 PE=4 SV=1	62	20	49	4	240	27.5	9.2	93.59	96.7	96.2	98	102.4	99	101.6	103	102	101.6	99.5
A0A1U8Q237	L-ascorbate peroxidase 2, cytosolic OS=Nelumbo nucifera OX=4432 GN=LOC104594740 PE=3 SV=1	64	14	88	12	250	27.4	5.83	154.47	214.9	209.7	214.6	43.2	43.7	42.2	39	40.1	41.2	111.5
A0A1U7ZVC9	guanine nucleotide-binding protein subunit beta-like protein OS=Nelumbo nucifera OX=4432 GN=LOC104596554 PE=4 SV=1	51	14	45	2	314	34.6	7.69	119.65	102.7	100.5	104	97.1	96.9	104.2	98.4	100.9	91.3	104
A0A1U8ARA4	eukaryotic translation initiation factor-like OS=Nelumbo nucifera OX=4432 GN=LOC104603247 PE=4 SV=1	35	27	41	23	801	88.2	8.15	96.08	104.5	104.5	102.3	96.3	96.9	98.9	97.6	97.5	97.8	103.7
A0A1U7ZU18	Delta-aminolevulinic acid dehydratase OS=Nelumbo nucifera OX=4432 GN=LOC104597834 PE=3 SV=1	35	12	32	12	501	54.5	7.93	69.87	115	121.5	115.3	87.2	89	89.3	96.3	90	94.5	101.9
A0A1U8AL72	26S protease regulatory subunit 10B homolog A OS=Nelumbo nucifera OX=4432 GN=LOC104601651 PE=3 SV=1	49	15	30	14	396	44.4	8.19	71.1	110.8	109.5	113.4	97.5	96.4	96	90.6	92.4	93.1	100.3
A0A1U7YM00	muscle M-line assembly protein unc-89 OS=Nelumbo nucifera OX=4432 GN=LOC104585583 PE=4 SV=1	33	16	25	16	670	72.8	4.45	73.08	94.4	95.7	94.4	107.2	107.3	109.3	93.7	100.6	95.4	102
A0A1U7ZS49	Succinate dehydrogenase [ubiquinone] flavoprotein subunit, mitochondrial OS=Nelumbo nucifera OX=4432 GN=LOC104595705 PE=3 SV=1	35	19	34	8	634	69.9	6.8	88.83	98	99.2	96.8	102.4	102.5	101.1	101	99.5	98.9	100.7
A0A1U8B5P1	Eukaryotic translation initiation factor 3 subunit B OS=Nelumbo nucifera OX=4432 GN=LOC104611061 PE=3 SV=1	29	22	38	22	721	83	5.19	84.13	107.8	108.1	109.4	96.1	95.9	97.1	96.9	95.2	92.6	100.9
A0A1U8A275	40S ribosomal protein S3-3-like OS=Nelumbo nucifera OX=4432 GN=LOC104596353 PE=3 SV=1	65	14	67	1	231	25.9	9.6	155.43	108.5	108.9	107.1	100.6	100.1	104.9	80.5	92.7	101.7	94.9
A0A1U7Z270	Adenylosuccinate synthetase, chloroplastic OS=Nelumbo nucifera OX=4432 GN=LOC104590291 PE=3 SV=1	51	20	33	20	499	53.9	7.4	78.67	109.7	108.9	107	100.2	98.6	96.1	91.1	92.6	92.7	103
A0A1U7Z7K1	Alpha-galactosidase OS=Nelumbo nucifera OX=4432 GN=LOC104591274 PE=3 SV=1	51	18	37	11	407	45.3	6	90.09	97.4	100.3	99	103.5	102.6	103.2	95.9	98.5	100.1	99.4
A0A1U8QA25	60S ribosomal protein L7-2-like OS=Nelumbo nucifera OX=4432 GN=LOC104611390 PE=4 SV=1	50	17	45	6	246	28.7	9.94	112.37	104.4	102.7	105.6	98.8	96.6	97.3	100.5	98.2	97.8	98
A0A1U8AG43	importin subunit beta-1-like OS=Nelumbo nucifera OX=4432 GN=LOC104604047 PE=4 SV=1	23	17	28	1	873	96.8	4.73	77.58	101	100.6	98.2	103.1	103	102.8	99.2	99.8	93.7	98.6
A0A1U8AHK4	40S ribosomal protein S3-3-like OS=Nelumbo nucifera OX=4432 GN=LOC104600596 PE=3 SV=1	67	15	69	1	234	26.2	9.52	154.95	106.4	133.5	127	116.7	113.7	108.2	76.4	102.1	31.2	84.7
A0A1U8AMD5	Fructose-bisphosphate aldolase OS=Nelumbo nucifera OX=4432 GN=LOC104602041 PE=3 SV=1	40	15	35	7	396	42.7	7.72	99.48	85.5	82.6	83.1	106.6	109.3	107.2	109.8	112.9	107.3	95.6
A0A1U7ZML2	Alpha-mannosidase OS=Nelumbo nucifera OX=4432 GN=LOC104591858 PE=3 SV=1	22	20	31	18	1018	114.7	6.09	84.39	102.3	102.5	99	98.9	101.9	98.7	97.6	100.6	97.9	100.5
A0A1U8BD39	Fructose-bisphosphate aldolase OS=Nelumbo nucifera OX=4432 GN=LOC104613328 PE=3 SV=1	34	13	42	6	393	42.9	8.68	113.62	71.7	72.8	72.4	112.8	111.8	113.1	116.9	116.2	115.7	96.5
A0A1U8AXH0	Pectinesterase OS=Nelumbo nucifera OX=4432 GN=LOC104604877 PE=4 SV=1	31	15	25	14	553	60	8.68	69.53	132.6	135.3	136	81.1	90.7	84.3	76.5	77.6	81.5	104.3
A0A1U7ZBK1	uncharacterized protein LOC104593008 OS=Nelumbo nucifera OX=4432 GN=LOC104593008 PE=4 SV=1	33	19	36	7	711	78.4	5.08	87.44	104.1	105.6	106.4	98.6	98.9	97.3	95.7	95.8	97.5	100.2
A0A1U8AIE1	Probable 6-phosphogluconolactonase OS=Nelumbo nucifera OX=4432 GN=LOC104604686 PE=3 SV=1	41	10	35	1	321	35	8.21	101.32	96.6	96.7	98.2	103.7	101.6	102.6	101.5	100.3	100.4	98.3
A0A1U7ZDP7	Proteasome subunit alpha type OS=Nelumbo nucifera OX=4432 GN=LOC104593552 PE=3 SV=1	49	12	29	12	249	27.3	6.32	84.29	103.7	104.2	103.5	100.1	97.9	98.4	96.5	97.3	98.5	99.9
A0A1U7ZQV1	glutamate--glyoxylate aminotransferase 2 OS=Nelumbo nucifera OX=4432 GN=LOC104593113 PE=4 SV=1	46	19	31	19	481	53.3	6.87	66.87	121.4	122.5	122.8	90.4	90	91.3	88.1	86.3	82.6	104.5
A0A1U8AR02	villin-4-like isoform X2 OS=Nelumbo nucifera OX=4432 GN=LOC104603155 PE=4 SV=1	28	24	32	24	960	108.2	6.06	76.47	105.2	106.3	105.7	101.7	99.4	96.7	95.4	94.8	93.5	101.3
A0A1U8APZ6	Succinate--CoA ligase [ADP-forming] subunit beta, mitochondrial OS=Nelumbo nucifera OX=4432 GN=LOC104602835 PE=3 SV=1	43	18	30	7	422	45.1	6.43	85.77	98.8	94	100.9	105.8	100.6	100.2	100.9	101.9	98.7	98.2
A0A1U8B5I1	SEC12-like protein 2 OS=Nelumbo nucifera OX=4432 GN=LOC104609948 PE=4 SV=1	56	17	29	17	399	43.1	5.82	74.57	105	106	106.9	99.9	101.5	102.4	92.9	91	92.8	101.5
A0A1U8AD30	S-(hydroxymethyl)glutathione dehydrogenase OS=Nelumbo nucifera OX=4432 GN=LOC104602724 PE=3 SV=1	46	12	36	9	378	40.5	7.33	110.25	106.7	104.6	107.4	96.9	98.9	98.4	97.2	95.1	93.8	100.9
A0A1U8APM3	cinnamoyl-CoA reductase 1-like OS=Nelumbo nucifera OX=4432 GN=LOC104606318 PE=4 SV=1	48	13	32	13	320	35.5	6.98	73.21	75.7	75.4	75.5	113.3	113.7	113.9	110.9	112	112.1	97.4
A0A1U7ZLS7	oxygen-evolving enhancer protein 1, chloroplastic OS=Nelumbo nucifera OX=4432 GN=LOC104595811 PE=4 SV=1	46	13	27	6	332	35.3	5.97	70.86	178.1	170.2	173.2	62.5	60.5	61.4	61.9	62.6	62.6	107.1
A0A1U8A2D2	apoptotic chromatin condensation inducer in the nucleus OS=Nelumbo nucifera OX=4432 GN=LOC104600068 PE=4 SV=1	46	21	32	17	658	72.3	4.91	69.29	95.3	96.2	95.7	99.3	100.7	102.1	101.8	103.4	104	101.5
A0A1U8B1Y8	bifunctional epoxide hydrolase 2-like OS=Nelumbo nucifera OX=4432 GN=LOC104606199 PE=4 SV=1	50	12	37	12	318	35.8	6.46	89.15	107.3	118.5	106.6	92.7	91.8	92.5	93.1	93.4	106.4	97.7
A0A1U7ZI34	heat shock protein 90-6, mitochondrial-like OS=Nelumbo nucifera OX=4432 GN=LOC104594214 PE=3 SV=1	27	19	36	6	790	90	5.69	86.79	117.5	124.4	109.6	90.6	99.3	91.9	90.1	85.7	83.8	107.2
A0A1U8B0E8	enhancer of mRNA-decapping protein 4-like OS=Nelumbo nucifera OX=4432 GN=LOC104608286 PE=4 SV=1	16	19	28	9	1393	151.2	5.77	74.41	104.4	105.2	99	95.4	106.1	107.6	91.8	89.4	95.3	105.8
A0A1U7ZD37	alcohol dehydrogenase OS=Nelumbo nucifera OX=4432 GN=LOC104589271 PE=3 SV=1	52	15	61	1	380	41.2	6.52	126.91	103.5	105.5	103	95.7	98.6	96.8	98.3	99.5	96.6	102.5
A0A1U8AJX8	exportin-2 OS=Nelumbo nucifera OX=4432 GN=LOC104604769 PE=4 SV=1	26	21	31	21	973	108.4	5.45	82.05	99.8	100.5	103	99.7	102.2	102	96.4	98.5	97.9	99.9
A0A1U7ZFN0	Pyrophosphate--fructose 6-phosphate 1-phosphotransferase subunit beta OS=Nelumbo nucifera OX=4432 GN=LOC104594094 PE=3 SV=1	33	20	40	7	570	62.6	7.2	73.88	84.1	89.3	84.8	115.6	116.5	112.5	99.4	100.9	99.5	97.4
A0A1U8B5V9	NADH dehydrogenase [ubiquinone] iron-sulfur protein 1, mitochondrial OS=Nelumbo nucifera OX=4432 GN=LOC104607307 PE=3 SV=1	35	21	30	21	750	81.5	6.79	65.61	102	101.9	99.9	100.8	99.2	98	99.8	99.9	98.2	100.4
A0A1U8BE19	Alpha-galactosidase OS=Nelumbo nucifera OX=4432 GN=LOC104610144 PE=3 SV=1	43	16	31	10	410	45.8	8.46	80.19	108.8	102.4	105.4	98.8	98.6	95.5	97.4	97.6	95.8	99.7
A0A1U8ADM1	40S ribosomal protein S6 OS=Nelumbo nucifera OX=4432 GN=LOC104599154 PE=3 SV=1	43	13	38	3	249	28.3	10.71	113.44	103.6	102.7	103.6	92.4	92.1	91.5	104.4	105	105.8	98.9
A0A1U7ZL19	60S ribosomal protein L7a-1-like OS=Nelumbo nucifera OX=4432 GN=LOC104591781 PE=4 SV=1	53	17	48	2	259	29.4	10.23	118.87	98.5	98.7	100.4	104	98.5	100.9	99.8	100.5	103.4	95.4
A0A1U8AD57	leucine--tRNA ligase, cytoplasmic-like isoform X1 OS=Nelumbo nucifera OX=4432 GN=LOC104602749 PE=3 SV=1	24	20	30	9	1094	124.4	6.11	59.09	107	102.2	101.7	99.5	97.4	98.3	98.2	97.6	93.5	104.6
A0A1U7ZE70	putative 3,4-dihydroxy-2-butanone kinase isoform X1 OS=Nelumbo nucifera OX=4432 GN=LOC104589617 PE=4 SV=1	34	17	25	12	594	61.9	5.57	60.06	88.2	90.8	89.5	107.5	110.4	113.7	97.5	97.7	102	102.7
A0A1U8B2I0	malate dehydrogenase, chloroplastic OS=Nelumbo nucifera OX=4432 GN=LOC104610142 PE=4 SV=1	41	11	32	10	413	43.5	7.56	85.72	106.7	107.4	107.7	98.6	98.1	94.9	97.9	96.6	92.7	99.5
A0A1U8A8Y1	oxygen-evolving enhancer protein 1, chloroplastic OS=Nelumbo nucifera OX=4432 GN=LOC104601999 PE=4 SV=1	52	14	26	7	332	35.2	5.97	60.58	176.6	170.2	179.3	60.1	60.3	59.9	61.9	61.7	62.7	107.1
A0A1U8AS49	DExH-box ATP-dependent RNA helicase DExH12-like OS=Nelumbo nucifera OX=4432 GN=LOC104606881 PE=4 SV=1	17	30	36	29	2177	246.9	5.96	61.94	102.1	102.8	103.4	101.3	101.4	98.4	96.8	93.1	97.2	103.5
A0A1U8Q1E7	alcohol dehydrogenase 1-like isoform X1 OS=Nelumbo nucifera OX=4432 GN=LOC104589272 PE=3 SV=1	48	15	53	4	416	45.4	6.96	108.89	110.3	107	111.8	93.5	92.8	92.6	99.7	97.8	94.7	99.8
A0A1U8ATW7	importin subunit beta-1-like OS=Nelumbo nucifera OX=4432 GN=LOC104604059 PE=4 SV=1	21	16	25	1	873	96.6	4.74	75.12	103.3	107	99.4	97	106.4	106.1	83.3	86.8	108.7	102
A0A1U7ZPU8	methyl-CpG-binding domain-containing protein 11-like OS=Nelumbo nucifera OX=4432 GN=LOC104592456 PE=4 SV=1	79	23	29	20	332	36.1	5.1	64.75	95.5	90.5	92.1	105.4	102.3	104.5	104.8	103.3	103.4	98.2
A0A1U7ZTQ7	40S ribosomal protein S14 OS=Nelumbo nucifera OX=4432 GN=LOC104597177 PE=3 SV=1	49	9	24	2	150	16.3	10.7	81.81	102	99.4	101.2	99.1	92.4	98.5	101.9	97	106.4	102
A0A1U7YZY4	40S ribosomal protein S14-like OS=Nelumbo nucifera OX=4432 GN=LOC104587778 PE=3 SV=1	49	9	25	2	150	16.3	10.7	89.14	104.4	104.1	105.6	95.1	97	96.5	96.1	98.9	100.1	102.3
A0A1U7ZTW3	aldose reductase-like OS=Nelumbo nucifera OX=4432 GN=LOC104597251 PE=4 SV=1	53	17	60	16	321	36.1	7.15	137.71	66.6	67.2	65.8	112.5	113.1	114.1	122.8	121.4	119.2	97.4
A0A1U8AIH3	Glycosyltransferase OS=Nelumbo nucifera OX=4432 GN=LOC104603347 PE=3 SV=1	36	16	36	16	459	50.1	6.74	110.22	146.1	140.5	145.8	75	76.8	77	78.6	80.8	76.7	102.7
A0A1U8AKF6	40S ribosomal protein S17-like OS=Nelumbo nucifera OX=4432 GN=LOC104601439 PE=3 SV=1	46	11	37	9	143	16.1	10.15	92.31	109	107.4	106.2	93	91.6	93.8	100	101.4	98.1	99.5
A0A1U7ZX41	uncharacterized protein LOC104594867 isoform X1 OS=Nelumbo nucifera OX=4432 GN=LOC104594867 PE=4 SV=1	31	16	33	16	619	66.6	6.74	76.38	90.2	89.7	88.9	106.4	106.7	105.1	102.8	107	105.3	98
A0A1U8AT09	putative 3,4-dihydroxy-2-butanone kinase isoform X1 OS=Nelumbo nucifera OX=4432 GN=LOC104607247 PE=4 SV=1	34	16	25	11	595	62.3	5.59	69.94	97.5	104	101.5	101.8	101	102.5	96.7	96.7	97.3	101
A0A1U7Z169	Coatomer subunit delta OS=Nelumbo nucifera OX=4432 GN=LOC104589974 PE=3 SV=1	41	20	39	20	528	58.1	5.9	92.07	127.1	126.6	130.5	86.5	90.1	85.1	86.4	84.1	85.1	98.5
A0A1U7ZW81	glutathione S-transferase DHAR2-like OS=Nelumbo nucifera OX=4432 GN=LOC104594651 PE=3 SV=1	78	12	38	11	212	23.6	5.2	102.69	125.3	125.7	126.1	87.9	86.9	89.6	87.4	86.9	83.4	100.8
A0A1U7ZXW5	protein disulfide-isomerase like 2-1-like OS=Nelumbo nucifera OX=4432 GN=LOC104598830 PE=3 SV=1	43	16	29	5	366	40.8	6.46	82.06	117.9	117.2	110.3	84.5	71	82.3	108.7	104.7	106.4	97
A0A1U8AAZ6	3-isopropylmalate dehydratase large subunit, chloroplastic OS=Nelumbo nucifera OX=4432 GN=LOC104600979 PE=4 SV=1	44	16	38	14	507	55.3	7.5	93.3	99.5	97.7	98.3	102	102.3	101.2	99.1	99.2	98.2	102.5
A0A1U8ATW1	26S proteasome non-ATPase regulatory subunit 2 homolog OS=Nelumbo nucifera OX=4432 GN=LOC104606415 PE=3 SV=1	29	23	30	4	892	97.9	5.12	79.13	95.5	93.1	86.1	104.4	107.3	97.5	114.9	102.1	96.6	102.5
A0A1U8ANJ0	presequence protease 2, chloroplastic/mitochondrial OS=Nelumbo nucifera OX=4432 GN=LOC104605874 PE=4 SV=1	27	25	34	25	1080	121.5	5.59	70.08	92.4	92.7	92.3	103.3	105.1	102.9	105.8	101.8	103.6	100.1
A0A1U7YZF6	probable nucleolar protein 5-1 OS=Nelumbo nucifera OX=4432 GN=LOC104587607 PE=4 SV=1	33	14	23	8	577	64.1	9	68.79	108.1	108.8	106.6	96.5	97.5	98.3	93.7	95.7	93.9	100.9
A0A1U8AZI7	Pectinesterase OS=Nelumbo nucifera OX=4432 GN=LOC104609247 PE=4 SV=1	27	14	24	13	580	63.1	7.88	77.75	98.8	98.2	96.5	107.2	104.7	105.8	100.1	94.3	96.5	98
A0A1U8AFT2	nuclear-pore anchor isoform X1 OS=Nelumbo nucifera OX=4432 GN=LOC104599796 PE=4 SV=1	16	33	38	32	2084	234.3	5.1	79.05	105.7	104	102.9	99.3	96.3	98.9	95.2	98.4	98.9	100.4
A0A1U7Z9R8	oxygen-evolving enhancer protein 2, chloroplastic-like OS=Nelumbo nucifera OX=4432 GN=LOC104590780 PE=4 SV=1	52	11	29	11	260	28.1	7.44	83.56	128.6	126.8	131.1	88	89.7	86.6	79.8	84.2	82.7	102.5
A0A1U8A1Q8	60S ribosomal protein L7a-1 OS=Nelumbo nucifera OX=4432 GN=LOC104599892 PE=4 SV=1	55	19	52	5	258	29.2	10.29	131.69	102.8	98.6	104.6	100.7	96.5	96.7	100.6	102.7	100.4	96.4
A0A1U8BJB4	prohibitin-1, mitochondrial OS=Nelumbo nucifera OX=4432 GN=LOC104611704 PE=4 SV=1	52	10	25	10	291	32	9.39	77.36	93.7	97.4	95.7	105.6	103.7	101.1	100	99.7	104.5	98.6
A0A1U8BC54	Proteasome subunit alpha type OS=Nelumbo nucifera OX=4432 GN=LOC104609256 PE=3 SV=1	63	13	36	13	267	29.3	4.83	94.39	98.1	101.9	99.7	95.8	106.9	101.7	96.1	97	101.7	101.2
A0A1U7ZB19	ATP synthase subunit d, mitochondrial OS=Nelumbo nucifera OX=4432 GN=LOC104588649 PE=3 SV=1	71	14	38	7	168	19.5	5.19	100.77	92.2	91.7	93.6	104.6	104.4	105.1	105	103.8	101.4	98.1
A0A1U7ZJK8	FRIGIDA-like protein OS=Nelumbo nucifera OX=4432 GN=LOC104595223 PE=3 SV=1	40	24	33	24	539	58.8	8.95	76.82	101.3	101.1	102	97.8	104.3	100.7	97.9	95.7	96.3	103
A0A1U8AUY8	elongation factor 1-beta 2-like OS=Nelumbo nucifera OX=4432 GN=LOC104604180 PE=3 SV=1	53	12	30	10	225	24.6	4.81	93.75	103.4	101	104	100.4	99.7	95.9	98.5	102.1	95.9	99
A0A1U7ZDG7	ras-related protein RABA2a OS=Nelumbo nucifera OX=4432 GN=LOC104588971 PE=4 SV=1	73	15	28	10	215	23.8	7.24	84.16	116	113.2	114.3	94.9	95.2	95.1	88.3	93.8	87.8	101.3
A0A1U8B5L7	Fructose-bisphosphate aldolase OS=Nelumbo nucifera OX=4432 GN=LOC104607517 PE=3 SV=1	41	14	33	6	397	42.8	7.71	86.25	79.3	79.8	79.9	111.5	112.3	108.6	109.6	112.9	108.2	97.8
A0A1U8AP14	ran-binding protein 1 homolog a-like OS=Nelumbo nucifera OX=4432 GN=LOC104602560 PE=4 SV=1	43	12	23	12	221	24.4	4.81	61.83	111.1	108.9	113.7	96.5	94.5	94.2	95.5	95.3	91.1	99.2
A0A1U7Z671	eukaryotic peptide chain release factor GTP-binding subunit ERF3A OS=Nelumbo nucifera OX=4432 GN=LOC104589660 PE=4 SV=1	36	16	33	16	523	58.1	5.35	78.02	107.1	108.9	105.8	98.5	97.3	95.2	95.6	93.8	96.1	101.6
A0A1U7ZGS9	Coatomer subunit beta OS=Nelumbo nucifera OX=4432 GN=LOC104589993 PE=4 SV=1	28	21	28	15	949	105.9	5.85	66.02	125.7	122.4	129.9	90.3	91.7	89.4	80.3	85	81.2	104
A0A1U8ASW3	methylmalonate-semialdehyde dehydrogenase [acylating], mitochondrial OS=Nelumbo nucifera OX=4432 GN=LOC104606141 PE=4 SV=1	21	12	34	12	583	62.8	7.25	100.99	91.8	92.1	92.1	101.8	102.9	102.3	106.6	105.2	105.2	100.1
A0A1U8A2Y0	Cysteine synthase OS=Nelumbo nucifera OX=4432 GN=LOC104596538 PE=3 SV=1	45	11	37	7	325	34.6	6.06	82.36	105.3	106.5	103.1	95.8	100.8	98.9	95.3	98.7	92.8	102.7
A0A1U8AHB2	DEAD-box ATP-dependent RNA helicase 56-like OS=Nelumbo nucifera OX=4432 GN=LOC104604418 PE=4 SV=1	44	17	38	4	428	48.3	5.64	88.2	101.6	101.1	102.1	100.2	101.8	100.4	98.5	97.7	98.7	98
A0A1U7ZU75	60S ribosomal protein L7a-1-like OS=Nelumbo nucifera OX=4432 GN=LOC104597873 PE=4 SV=1	50	17	46	1	258	29.1	10.33	110.07	103.7	98.2	104.8	90.9	95.8	99.2	103.3	100.6	106.1	97.3
A0A1U8B8V6	vesicle-fusing ATPase-like OS=Nelumbo nucifera OX=4432 GN=LOC104608226 PE=4 SV=1	34	22	29	21	744	81.6	6.37	76.76	112.1	112.5	113.6	96.7	94.1	93.1	92.3	92.1	89.8	103.7
A0A1U8A9S3	Polyadenylate-binding protein OS=Nelumbo nucifera OX=4432 GN=LOC104601728 PE=3 SV=1	34	17	26	11	653	71.4	8.03	66.04	110.2	105.6	115.2	92.6	97.8	90	94.4	100	92.5	101.8
A0A1U8B5X8	phosphoglucomutase, cytoplasmic-like OS=Nelumbo nucifera OX=4432 GN=LOC104607342 PE=3 SV=1	35	15	33	4	583	63.9	5.22	89.8	104.5	112.2	103.8	96.4	105.4	89.4	88	102.2	88.2	109.8
A0A1U8B7B4	plasminogen activator inhibitor 1 RNA-binding protein OS=Nelumbo nucifera OX=4432 GN=LOC104610505 PE=4 SV=1	42	13	29	11	359	38.9	6.47	72.44	108.1	107.9	107.8	93.7	93.4	95.3	98.6	99.2	96.8	99.3
A0A1U7Z788	DEAD-box ATP-dependent RNA helicase 11-like OS=Nelumbo nucifera OX=4432 GN=LOC104587498 PE=4 SV=1	34	18	30	4	626	67.1	8.56	67.28	102.1	102	100.8	99.5	103.8	101.3	94	98.1	96.4	102
A0A1U7ZFT4	Coatomer subunit beta OS=Nelumbo nucifera OX=4432 GN=LOC104589685 PE=4 SV=1	24	19	27	13	949	105.8	5.62	71.57	115.5	117.5	112.3	93	102	96.2	81.1	89	91.2	102.4
A0A1U7YYA1	guanylate-binding protein 1-like OS=Nelumbo nucifera OX=4432 GN=LOC104589086 PE=4 SV=1	21	24	31	15	1071	120.6	6.92	65.12	96	101.6	99	95.4	97.2	96.9	103	102.3	109	99.5
A0A1U7ZX84	40S ribosomal protein S3a OS=Nelumbo nucifera OX=4432 GN=LOC104598648 PE=3 SV=1	68	18	46	5	261	29.9	9.83	105.44	106.2	104.3	107.7	96.8	94.6	95.6	99.9	98.4	97.2	99.2
A0A1U8B9L0	Glutathione peroxidase OS=Nelumbo nucifera OX=4432 GN=LOC104608706 PE=3 SV=1	47	12	37	12	249	27.7	9.42	91.96	79.6	80.9	82.9	107.1	104	107.1	117.8	113.5	110.2	96.9
A0A1U8A7F7	legumin B-like OS=Nelumbo nucifera OX=4432 GN=LOC104601008 PE=4 SV=1	28	9	60	4	347	39.5	7.2	154.97	85	84.5	86	111.2	113.5	118.6	98.9	102	100.9	99.5
A0A1U7Z1C9	mitochondrial-processing peptidase subunit alpha-like OS=Nelumbo nucifera OX=4432 GN=LOC104588252 PE=3 SV=1	45	16	31	16	506	54.8	6.09	75.31	95.9	96.1	96.4	102.2	99.8	102.6	105.9	102.9	100.8	97.4
A0A1U8B579	S-adenosylmethionine synthase OS=Nelumbo nucifera OX=4432 GN=LOC104607120 PE=3 SV=1	43	13	30	6	393	42.9	5.91	78.42	197.2	199	197.9	51.1	50.8	49.3	46.5	46.2	53.6	108.2
A0A1U8BCJ6	threonine--tRNA ligase, mitochondrial 1-like OS=Nelumbo nucifera OX=4432 GN=LOC104609663 PE=3 SV=1	32	24	33	9	729	83.6	6.99	75.01	117.5	116.9	117.6	91.6	95	91	89.2	90.5	87.7	103
A0A1U7ZMU8	Serine hydroxymethyltransferase OS=Nelumbo nucifera OX=4432 GN=LOC104595554 PE=3 SV=1	37	15	33	7	518	57.2	8.31	83.89	98.5	96.5	98.1	102.6	103.5	103.8	98.4	97.5	98.2	102.8
A0A1U8ASY9	60S ribosomal protein L7-2 OS=Nelumbo nucifera OX=4432 GN=LOC104606157 PE=4 SV=1	53	17	45	6	246	28.6	9.98	114.97	108.4	111.9	112.5	94.7	96.1	92.7	93.5	94.6	95.6	100.2
A0A1U8AGW1	probable 26S proteasome non-ATPase regulatory subunit 3 OS=Nelumbo nucifera OX=4432 GN=LOC104604283 PE=4 SV=1	44	20	29	8	488	55.7	9.17	67.37	100	99.7	98.5	99	102.2	102.1	100.4	98.4	100.5	99.2
A0A1U8BJ18	Calcium-transporting ATPase OS=Nelumbo nucifera OX=4432 GN=LOC104611393 PE=3 SV=1	25	22	34	22	1074	117.5	7.68	68.23	81.2	82.4	82.7	107.6	109.3	109.8	110	110	109.2	97.8
A0A1U8A2Z4	LOW QUALITY PROTEIN: 26S protease regulatory subunit 6A homolog OS=Nelumbo nucifera OX=4432 GN=LOC104599705 PE=3 SV=1	46	18	33	3	423	47.4	5.07	87.58	110.8	114.9	113.6	95	95.4	95	88	87.5	96.4	103.3
A0A1U8BD62	Probable 6-phosphogluconolactonase OS=Nelumbo nucifera OX=4432 GN=LOC104609858 PE=3 SV=1	41	10	34	1	321	34.9	7.9	96.72
A0A1U8AIV9	40S ribosomal protein S6 OS=Nelumbo nucifera OX=4432 GN=LOC104604484 PE=3 SV=1	43	13	39	1	249	28.3	10.76	112.27	102.8	105.8	108.1	91.9	95.6	96	97.7	106.4	97.3	98.4
A0A1U8AYS0	Sucrose synthase OS=Nelumbo nucifera OX=4432 GN=LOC104607856 PE=3 SV=1	27	22	37	9	806	92.5	6.43	90.96	142.2	142.8	141.9	75.9	84.1	80.9	73.7	78.9	78.6	101
A0A1U7ZCY8	plastid lipid-associated protein 3, chloroplastic-like OS=Nelumbo nucifera OX=4432 GN=LOC104588817 PE=4 SV=1	32	10	39	7	376	40.8	5.53	106.42	102.2	99.5	104.4	100	102.6	101.1	94.4	98.6	95.6	101.7
A0A1U8B244	Malate dehydrogenase OS=Nelumbo nucifera OX=4432 GN=LOC104610015 PE=3 SV=1	38	14	39	3	332	35.5	6.54	108.65	118.4	117.4	118.8	90.7	90.8	89.3	93.2	91.2	90.9	99.3
A0A1U8A1I6	Isocitrate dehydrogenase [NADP] OS=Nelumbo nucifera OX=4432 GN=LOC104599821 PE=3 SV=1	42	16	31	14	418	46.9	6.99	74.85	118.7	116.3	119.6	91.4	91	89.7	93.3	90.5	88.2	101.4
A0A1U8AYY7	Peptidyl-prolyl cis-trans isomerase OS=Nelumbo nucifera OX=4432 GN=LOC104605558 PE=3 SV=1	85	13	85	11	173	18.2	8.72	166.95	92.2	90.4	94.1	107.6	105.8	106.6	104.6	103	99.3	96.5
A0A1U8AJF1	V-type proton ATPase subunit B 2 OS=Nelumbo nucifera OX=4432 GN=LOC104603669 PE=3 SV=1	38	17	29	17	487	54.1	5.19	75.13	107.4	108.4	104.4	97.2	100.4	99.3	93.3	95.6	93.9	100.1
A0A1U8AZG2	Ubiquitin carboxyl-terminal hydrolase OS=Nelumbo nucifera OX=4432 GN=LOC104605724 PE=3 SV=1	26	18	24	18	806	90	5.16	59.85	97.3	100.3	96.8	99.2	105.3	102.2	100	95.9	100.1	102.9
A0A1U7Z8P5	AP-4 complex subunit epsilon OS=Nelumbo nucifera OX=4432 GN=LOC104590425 PE=3 SV=1	28	20	26	20	971	106.3	5.95	63.19	115.8	115.4	113.2	93.1	94	94.2	85.9	88.7	91.2	108.5
A0A1U8AKB6	triosephosphate isomerase, chloroplastic isoform X1 OS=Nelumbo nucifera OX=4432 GN=LOC104605197 PE=3 SV=1	38	12	25	4	327	35.3	6.79	71.21	106.3	109	108.5	97.7	98.1	96.3	94.8	96.6	92.8	100
A0A1U7ZAT5	vicilin-like seed storage protein At2g18540 OS=Nelumbo nucifera OX=4432 GN=LOC104588177 PE=4 SV=1	18	12	60	12	533	60.7	5.21	166.02	94.4	92	94.7	100.1	100.2	100.9	107.1	107	104.8	98.8
A0A1U7ZU21	GDSL esterase/lipase At1g71250 OS=Nelumbo nucifera OX=4432 GN=LOC104594025 PE=4 SV=1	43	10	33	10	369	40.5	8.56	71.87	101.4	103	101.1	99.3	104.4	105.8	92.2	95.1	95.9	102
A0A1U8AJN5	2S sulfur-rich seed storage protein 2-like OS=Nelumbo nucifera OX=4432 GN=LOC104604991 PE=4 SV=1	45	7	30	7	148	17	5.17	94.92	145.5	145.3	148.8	66.1	67.4	66.7	86.8	87.9	83	102.6
A0A1U7ZKG5	Signal recognition particle subunit SRP72 OS=Nelumbo nucifera OX=4432 GN=LOC104591630 PE=3 SV=1	35	18	26	18	669	73.7	9.11	58.83	101.8	104.2	102.3	98.2	96.8	99.8	98.9	97.7	99.3	100.9
A0A1U8ACF4	histidine--tRNA ligase, cytoplasmic isoform X1 OS=Nelumbo nucifera OX=4432 GN=LOC104598851 PE=3 SV=1	27	23	31	23	908	99.9	6.55	67.03	108.8	105.6	111	97.5	97	95.5	93.4	96.7	92.7	101.8
A0A1U8AG73	uncharacterized protein LOC104600232 isoform X1 OS=Nelumbo nucifera OX=4432 GN=LOC104600232 PE=4 SV=1	32	12	20	12	530	59.3	7.17	60.56	86.9	87.7	84.3	112.5	108.5	107	103.4	105.6	104.2	100
A0A1U8AMW9	Ketol-acid reductoisomerase OS=Nelumbo nucifera OX=4432 GN=LOC104605687 PE=3 SV=1	25	12	31	4	592	63.9	7.25	84.57	122.6	123.8	120.1	90.8	90.3	91.9	86.3	86.7	83.7	103.9
A0A1U7YX54	alcohol dehydrogenase 3-like OS=Nelumbo nucifera OX=4432 GN=LOC104587950 PE=3 SV=1	47	13	49	3	379	41.1	5.81	112.09	124.8	119.9	116	89.4	86	85.1	90.9	90.7	94.4	102.6
A0A1U8B311	mannose/glucose-specific lectin-like OS=Nelumbo nucifera OX=4432 GN=LOC104609125 PE=4 SV=1	67	7	33	7	147	15.6	7.43	105.69	35.9	35.5	35.1	127.4	129.3	127.3	139.8	140	137.4	92.2
A0A1U7ZLJ3	very-long-chain 3-oxoacyl-CoA reductase 1-like OS=Nelumbo nucifera OX=4432 GN=LOC104591581 PE=3 SV=1	29	14	28	7	403	44.9	9.72	84.61	73.8	74.8	71.9	109.9	114.4	116.8	111.9	116.5	114.6	95.5
A0A1U8B8Y3	40S ribosomal protein S3a OS=Nelumbo nucifera OX=4432 GN=LOC104608472 PE=3 SV=1	67	17	49	3	261	29.9	9.76	111.25	105	103.2	104.1	97.2	98.8	100.9	94.9	99.6	97.7	98.5
A0A1U7ZG22	40S ribosomal protein S8 OS=Nelumbo nucifera OX=4432 GN=LOC104594192 PE=3 SV=1	45	10	25	4	220	24.8	10.45	80.19	108.2	106.2	108.9	93	93.9	94.5	100.8	101	95.3	98.4
A0A1U8AY08	40S ribosomal protein S6 OS=Nelumbo nucifera OX=4432 GN=LOC104608653 PE=3 SV=1	43	13	37	1	249	28.3	10.64	106.74	88.5	79.6	83.8	104.4	109.8	108	102.4	121.9	105.7	95.9
A0A1U8BPU1	Eukaryotic translation initiation factor 3 subunit E OS=Nelumbo nucifera OX=4432 GN=LOC104613455 PE=3 SV=1	45	15	29	6	442	51.9	5.76	61.81	107.1	106.5	103.6	97.8	101.8	98.9	91.6	93.3	96.7	102.5
A0A1U8B5J3	uncharacterized protein LOC104611013 OS=Nelumbo nucifera OX=4432 GN=LOC104611013 PE=3 SV=1	31	17	34	17	608	66.1	6.62	86.23	101.4	100.1	100.1	98.7	99.8	99.2	104	99.7	97.3	99.7
A0A1U8B4K2	40S ribosomal protein S12 OS=Nelumbo nucifera OX=4432 GN=LOC104610708 PE=3 SV=1	65	8	30	4	138	14.6	6.27	99.7	115.9	116	117.4	95.1	92.8	92.7	91.8	90	87.1	101.1
A0A1U8ASZ8	glycine-rich cell wall structural protein 1.8-like OS=Nelumbo nucifera OX=4432 GN=LOC104603605 PE=4 SV=1	34	3	39	3	195	18.8	4.56	137.77	37.3	38.2	35.6	120.8	125.1	119.9	140.5	145.4	143.5	93.9
A0A1U8B3T6	6-phosphogluconate dehydrogenase, decarboxylating OS=Nelumbo nucifera OX=4432 GN=LOC104609360 PE=3 SV=1	38	16	25	7	518	56.9	6.68	68.02	110.7	113	113.9	95	94.7	95.9	93.7	88.2	91.1	103.9
A0A1U8AHD1	serine/threonine-protein phosphatase 2A 65 kDa regulatory subunit A beta isoform-like OS=Nelumbo nucifera OX=4432 GN=LOC104602993 PE=4 SV=1	33	17	26	2	587	65.7	4.97	66.18	108.8	109.1	109	96.1	99.9	96.5	93	90.4	94.5	102.6
A0A1U8AJH8	Succinate--CoA ligase [ADP-forming] subunit beta, mitochondrial OS=Nelumbo nucifera OX=4432 GN=LOC104600926 PE=3 SV=1	45	20	27	9	422	45.1	6.8	68.72	99.5	96.4	95.6	102.4	104.2	104.1	97	102.3	97.8	100.7
A0A1U8BCZ9	60S ribosomal protein L9 OS=Nelumbo nucifera OX=4432 GN=LOC104612137 PE=4 SV=1	54	11	45	7	193	21.8	9.64	116.46	107.6	106.3	108.3	95.4	96.8	94.1	98.3	95.8	96.7	100.8
A0A1U8B288	65-kDa microtubule-associated protein 1-like OS=Nelumbo nucifera OX=4432 GN=LOC104606529 PE=4 SV=1	28	17	29	10	585	65.7	5.19	71.7	179.3	177.3	183.8	62.1	61.7	62.3	53.2	55.8	56.1	108.4
A0A1U7ZS27	UDP-glycosyltransferase 87A1-like OS=Nelumbo nucifera OX=4432 GN=LOC104597281 PE=4 SV=1	38	17	31	17	464	51.9	5.71	77.54	80	81.5	80.8	114.4	113.9	112	106.1	104.9	104.1	102.3
A0A1U8B2N3	dynamin-2A OS=Nelumbo nucifera OX=4432 GN=LOC104610181 PE=3 SV=1	31	26	33	26	924	100.5	9.03	78.4	120.3	122.5	119	92.4	91.8	91.2	86.1	88	83.9	104.9
A0A1U7ZZY5	fumarate hydratase 1, mitochondrial OS=Nelumbo nucifera OX=4432 GN=LOC104598878 PE=3 SV=1	41	15	21	6	495	53.5	8.47	58.66	95.1	94.8	94.3	105.7	104.3	100.8	104.6	103.9	98.2	98.5
A0A1U7ZJ85	14 kDa zinc-binding protein OS=Nelumbo nucifera OX=4432 GN=LOC104593485 PE=4 SV=1	59	10	33	10	158	17.2	7.5	99.26	109.9	108.2	111.4	97.7	94.4	93.2	96.5	96.5	93.6	98.7
A0A1U7Z9Y7	(RS)-norcoclaurine 6-O-methyltransferase-like OS=Nelumbo nucifera OX=4432 GN=LOC104590845 PE=2 SV=1	54	17	38	15	347	38.9	6.25	84.49	157.2	155.5	157	69.2	70.2	69	72.3	71.7	71.4	106.6
A0A1U8QBI3	Lactoylglutathione lyase OS=Nelumbo nucifera OX=4432 GN=LOC104612773 PE=3 SV=1	50	12	38	11	292	32.9	5.2	81.37	106.1	102.8	103.2	97.5	96.2	96.6	99.7	101.6	98	98.3
A0A1U7ZJE8	probable tocopherol O-methyltransferase, chloroplastic OS=Nelumbo nucifera OX=4432 GN=LOC104590835 PE=3 SV=1	43	13	31	13	312	34.9	7.23	79.45	198.2	194.1	195.8	53	52.7	51.2	48.3	48.7	49.9	108
A0A1U7ZUP5	UDP-glucose 6-dehydrogenase OS=Nelumbo nucifera OX=4432 GN=LOC104597981 PE=3 SV=1	39	14	23	4	480	53.1	6.16	65.74	118.9	116.5	118.3	93.8	94.8	95.2	90.4	84.1	84.5	103.5
A0A1U7Z856	actin-interacting protein 1-2-like OS=Nelumbo nucifera OX=4432 GN=LOC104587785 PE=4 SV=1	34	19	30	19	608	65.6	6.38	69.06	109.5	106.6	109.7	96.2	96.6	93.9	96.7	95.5	95.2	100
A0A1U8A9G1	serine/threonine-protein phosphatase 2A 65 kDa regulatory subunit A beta isoform OS=Nelumbo nucifera OX=4432 GN=LOC104601618 PE=4 SV=1	35	17	25	2	587	65.7	5	65.87	127.4	95.7	86.3	105.8	116.9	94.2	78.4	102.1	99.8	93.4
A0A1U8BBP6	60S ribosomal protein L13 OS=Nelumbo nucifera OX=4432 GN=LOC104612876 PE=3 SV=1	47	12	33	4	207	23.8	10.64	89.05	102.2	102.1	104.1	94.9	94.7	96.4	104.4	103.5	99.7	98
D3WC34	ATP synthase subunit alpha, chloroplastic OS=Nelumbo nucifera OX=4432 GN=atpA PE=3 SV=1	33	15	39	15	507	55.4	5.34	106.61	104.9	101	101.6	100.4	102.6	101.3	95.5	97.1	95.3	100.1
A0A1U7ZTN7	triosephosphate isomerase, cytosolic OS=Nelumbo nucifera OX=4432 GN=LOC104597191 PE=3 SV=1	53	11	38	6	253	27	5.97	100.46	93.7	93	93.3	100	104.7	100.8	105.7	105.1	103.3	100.3
A0A1U8A8Y7	60S ribosomal protein L5 OS=Nelumbo nucifera OX=4432 GN=LOC104598220 PE=3 SV=1	48	14	34	7	303	35	8.98	89.56	98.7	105.4	99.8	95.6	105.8	99.5	99.6	98.3	98.2	98.9
A0A1U7ZE38	glycine-rich RNA-binding protein 3, mitochondrial OS=Nelumbo nucifera OX=4432 GN=LOC104593094 PE=4 SV=1	31	12	34	11	369	38.1	7.25	87.77	97.9	100.3	97.7	97.2	97.7	100.4	103.6	100.5	101.1	103.7
A0A1U7Z6G2	acetolactate synthase small subunit 2, chloroplastic-like OS=Nelumbo nucifera OX=4432 GN=LOC104586808 PE=4 SV=1	42	17	28	17	482	52.9	8.22	64.72	104.2	108.6	106.8	99.9	99.1	99.6	93.8	92.3	95.9	99.8
A0A1U8AJY6	Glucose-6-phosphate isomerase OS=Nelumbo nucifera OX=4432 GN=LOC104603808 PE=3 SV=1	33	20	28	11	637	69.8	6	64.57	99.1	105.1	99.1	102.1	107.4	106.7	92.3	94.1	94.3	99.7
A0A1U8AKV4	Ribosomal protein OS=Nelumbo nucifera OX=4432 GN=LOC104605335 PE=3 SV=1	47	10	44	1	216	24.6	9.79	102.24	102.2	103.5	103.9	98.9	98.1	99.8	97.3	97.3	99	100
A0A1U7ZDF0	adenylate kinase 4-like OS=Nelumbo nucifera OX=4432 GN=LOC104592937 PE=3 SV=1	59	17	36	7	246	26.9	7.09	80.67	93.7	94.1	93.7	105.1	102.8	107.7	103.1	102.5	99.6	97.7
A0A1U7ZGM9	60S ribosomal protein L7a-1 OS=Nelumbo nucifera OX=4432 GN=LOC104592821 PE=4 SV=1	54	18	41	2	259	29.5	10.24	100.01	108.7	107.4	105.5	95.1	95.8	95.6	96.9	97.1	99.9	98
A0A1U7ZID2	heterogeneous nuclear ribonucleoprotein 1 OS=Nelumbo nucifera OX=4432 GN=LOC104594284 PE=4 SV=1	53	13	33	12	360	37.1	9.23	89.95	106.9	108.5	103.3	98.8	93.8	94.5	97.4	100.2	93.2	103.5
A0A1U8AL21	GTP-binding protein SAR1A OS=Nelumbo nucifera OX=4432 GN=LOC104605101 PE=3 SV=1	75	11	31	11	193	22	7.47	88.3	100.1	101	100.4	98.8	100.4	100.8	98.4	100.9	98.8	100.3
A0A1U8AKE4	probable fructokinase-1 OS=Nelumbo nucifera OX=4432 GN=LOC104605215 PE=3 SV=1	46	14	24	13	324	35.2	7.4	64.82	128.5	127.3	129.6	86.6	87	85.3	82.7	85.5	84.6	102.9
A0A1U8B0Y5	probable beta-D-xylosidase 7 OS=Nelumbo nucifera OX=4432 GN=LOC104605943 PE=4 SV=1	22	18	26	18	823	89.9	8.25	73.85	113	113.4	112.1	99.1	97.4	97.7	84.8	86.2	94.8	101.3
A0A1U8AYW7	LL-diaminopimelate aminotransferase, chloroplastic isoform X1 OS=Nelumbo nucifera OX=4432 GN=LOC104609047 PE=3 SV=1	40	15	33	15	459	50	7.84	80.11	98.4	101.3	99.7	102.2	102.1	98.8	100.2	100.8	97.6	99
A0A1U8ADQ3	RNA-binding KH domain-containing protein PEPPER-like OS=Nelumbo nucifera OX=4432 GN=LOC104599176 PE=4 SV=1	33	13	24	8	467	49.4	5.63	70.98	106.7	105	108.7	97.2	95.5	98.1	96.8	97.3	95.4	99.5
A0A1U8BNV5	40S ribosomal protein S3-3 OS=Nelumbo nucifera OX=4432 GN=LOC104612879 PE=3 SV=1	65	16	64	4	231	26	9.66	151.33	108.3	106.8	109.3	96.9	95.9	97	96.5	95.5	94.2	99.6
A0A1U8AMT9	Delta-1-pyrroline-5-carboxylate synthase OS=Nelumbo nucifera OX=4432 GN=LOC104601951 PE=3 SV=1	34	21	24	21	717	77.6	6.9	61.56	117.9	124.6	115.7	93.8	93	93.5	84.8	86.9	88.9	100.9
A0A1U8A859	Dihydrolipoamide acetyltransferase component of pyruvate dehydrogenase complex OS=Nelumbo nucifera OX=4432 GN=LOC104601757 PE=3 SV=1	41	14	30	12	490	51	8.82	77.63	114.8	115.4	117.6	90.7	93.5	90.6	90.8	92	88.9	105.6
A0A1U8BEN7	40S ribosomal protein S8 OS=Nelumbo nucifera OX=4432 GN=LOC104612644 PE=3 SV=1	47	10	26	4	219	24.9	10.42	83.13	110	108.4	112.6	95.6	93.9	95.2	94.7	95	92.5	102.1
A0A1U8B012	40S ribosomal protein SA OS=Nelumbo nucifera OX=4432 GN=LOC104609317 PE=3 SV=1	48	13	48	3	300	32.9	5.17	124.43	105.5	104	104.2	99.6	103.1	99.7	93.9	93.5	97	99.5
A0A1U8A582	long chain acyl-CoA synthetase 4-like isoform X1 OS=Nelumbo nucifera OX=4432 GN=LOC104600370 PE=4 SV=1	29	18	35	18	660	74.1	6.55	69.96	108.4	109.2	105.6	97.4	100.8	97.2	90.5	95.3	91.4	104.2
A0A1U8BDQ0	Ribosomal protein OS=Nelumbo nucifera OX=4432 GN=LOC104612359 PE=3 SV=1	47	10	46	1	216	24.6	9.79	105.78	108.3	106.2	106.3	94.1	94.7	94.2	100.8	99.7	97.6	97.9
A0A1U8AS11	protein argonaute 1-like isoform X1 OS=Nelumbo nucifera OX=4432 GN=LOC104606963 PE=3 SV=1	26	25	30	25	1085	119.7	9.42	63.06	114	110.4	112.5	92	95	92.5	92.7	95.1	94.4	101.2
A0A1U8B9K8	importin-5-like OS=Nelumbo nucifera OX=4432 GN=LOC104611133 PE=4 SV=1	19	19	28	6	1116	123.5	4.91	61.21	109	110.8	110.2	95	99	95	93.5	91.6	91.6	104.3
A0A1U7Z851	beta-glucosidase 44-like OS=Nelumbo nucifera OX=4432 GN=LOC104587780 PE=3 SV=1	37	19	34	16	518	59.3	9.19	90.87	99.6	97.7	101.9	105.6	107.2	107	94.1	93.3	93.3	100.3
A0A1U8ADP8	uncharacterized protein LOC104599172 OS=Nelumbo nucifera OX=4432 GN=LOC104599172 PE=4 SV=1	27	13	35	13	447	51.4	9.5	72.05	99.1	100.6	101.4	101.2	99.7	99.4	100.9	100	96.6	101
A0A1U7ZJZ1	26S protease regulatory subunit 8 homolog A OS=Nelumbo nucifera OX=4432 GN=LOC104595314 PE=3 SV=1	39	15	32	13	418	47.1	8.75	73.6	113.6	110.9	109.7	96.9	95.9	94.1	93.5	94.4	90	101
A0A1U7ZL70	aspartic proteinase A1-like OS=Nelumbo nucifera OX=4432 GN=LOC104594044 PE=3 SV=1	33	13	23	11	514	55.8	5.64	56.31	129.3	126.3	127.8	88.2	89.1	84.7	84.6	87.1	84.3	98.6
A0A1U7YYN4	probable cytosolic oligopeptidase A OS=Nelumbo nucifera OX=4432 GN=LOC104588450 PE=3 SV=1	25	18	27	12	777	87.8	6.09	71.38	105.2	108.9	106.9	96.1	95.6	98.2	96.6	95.7	95.4	101.4
A0A1U8A014	Adenylyl cyclase-associated protein OS=Nelumbo nucifera OX=4432 GN=LOC104595710 PE=3 SV=1	56	25	32	22	475	51.2	7.33	77.43	109.5	108.6	110.3	95.9	96.5	95	93.9	96.2	93.9	100.2
A0A1U8B922	porphobilinogen deaminase, chloroplastic isoform X1 OS=Nelumbo nucifera OX=4432 GN=LOC104610973 PE=3 SV=1	45	13	27	13	374	40.5	7.34	63.85	127.1	130.7	126.1	84.7	86.7	86.5	85.8	83.6	87.7	101.1
A0A1U8AYH3	uncharacterized protein LOC104605397 OS=Nelumbo nucifera OX=4432 GN=LOC104605397 PE=4 SV=1	45	15	23	13	371	40.4	5.05	63.75	106	106.4	106.4	97.2	97.2	96.1	95.6	97.7	96.5	100.8
A0A1U7ZD90	mitochondrial import receptor subunit TOM20-like OS=Nelumbo nucifera OX=4432 GN=LOC104592890 PE=4 SV=1	60	11	26	9	204	22.5	6.54	68.38	99.6	98.8	98.3	102.7	102.7	97.5	99	101.3	101.9	98.3
A0A1U8BC36	DNA-damage-repair/toleration protein DRT102 OS=Nelumbo nucifera OX=4432 GN=LOC104611832 PE=4 SV=1	38	12	31	12	395	43.2	6.52	74.72	103.5	111.3	103.2	100	104.2	101.9	90.4	93	93.2	99.1
A0A1U8AJZ6	UDP-glucose 6-dehydrogenase OS=Nelumbo nucifera OX=4432 GN=LOC104601106 PE=3 SV=1	39	15	24	4	480	53	6.86	68.45	160.1	160.1	160	73	74.4	74.3	62.7	62.3	63.2	109.8
A0A1U8AY14	Phospho-2-dehydro-3-deoxyheptonate aldolase OS=Nelumbo nucifera OX=4432 GN=LOC104608661 PE=3 SV=1	33	17	26	12	541	59.7	8.62	66.23	198.6	194.6	195.4	51.8	53.2	50.5	46.7	50.4	50.7	108
A0A1U8B7M4	14-3-3-like protein D isoform X1 OS=Nelumbo nucifera OX=4432 GN=LOC104611601 PE=3 SV=1	54	16	45	7	261	29.5	4.88	106.65	111.8	109.8	111.5	100.9	98.1	101.5	89.6	86.9	85.8	104
A0A1U8A428	14-3-3-like protein GF14 iota OS=Nelumbo nucifera OX=4432 GN=LOC104598956 PE=3 SV=1	52	17	39	9	259	29.6	4.93	86.08	120	115	118.1	91.2	92.2	89.1	93	90.1	90.7	100.7
A0A1U8B9E0	Beta-hexosaminidase OS=Nelumbo nucifera OX=4432 GN=LOC104612173 PE=3 SV=1	32	17	42	15	527	59.2	7.15	92.71	106	107	104.9	99.3	101.1	100.6	93	92.8	93.4	101.9
A0A1U7Z5A4	26S proteasome non-ATPase regulatory subunit 1 homolog OS=Nelumbo nucifera OX=4432 GN=LOC104589385 PE=3 SV=1	17	16	28	7	1005	109.3	5.26	70.51	107.5	111.1	109	92.8	98.4	95.7	87.6	88.7	97.6	111.6
A0A1U8AB46	UDP-glucose 6-dehydrogenase OS=Nelumbo nucifera OX=4432 GN=LOC104598784 PE=3 SV=1	38	14	24	2	480	52.9	6.65	66.04	138.3	137.3	136.6	81.4	85.5	83.8	77	77.2	79.6	103.3
A0A1U8AIA1	Beta-adaptin-like protein OS=Nelumbo nucifera OX=4432 GN=LOC104604296 PE=3 SV=1	21	17	25	3	900	99.6	5.14	60.14	121.5	119.7	120.7	94.1	89.9	90.5	81.7	88.6	91.3	102
A0A1U7Z2P6	basic leucine zipper and W2 domain-containing protein 2-like OS=Nelumbo nucifera OX=4432 GN=LOC104586095 PE=4 SV=1	45	16	29	16	411	47.2	5.55	71.43	114.7	121.8	106.3	94.8	96.6	97	88.6	91.1	87.8	101.1
A0A1U8B9T0	threonine--tRNA ligase, mitochondrial 1-like OS=Nelumbo nucifera OX=4432 GN=LOC104608503 PE=3 SV=1	29	22	31	7	726	83.8	7.11	67.33	118.1	117.9	122	93.6	94.6	86.8	90	89.8	85.2	102
A0A1U7ZBP9	Serine hydroxymethyltransferase OS=Nelumbo nucifera OX=4432 GN=LOC104588452 PE=3 SV=1	32	13	31	5	522	57.9	9.04	70.48	91.8	93.1	89.6	103.8	107.5	111.1	98.6	103.6	100.9	100.1
A0A1U7YWA0	Protein ROOT HAIR DEFECTIVE 3 homolog OS=Nelumbo nucifera OX=4432 GN=LOC104586627 PE=3 SV=1	26	18	25	11	816	90.6	6	61.26	109.9	108.1	107.7	95.3	99	96.7	94.8	92	93.5	103.1
A0A1U7Z5R4	uncharacterized protein LOC104591473 OS=Nelumbo nucifera OX=4432 GN=LOC104591473 PE=4 SV=1	48	13	23	13	343	38.3	6.3	56.94	107.4	102.6	104.4	98	96.1	96.7	96.8	97.6	100.3	100.1
A0A1U7ZJF3	(RS)-norcoclaurine 6-O-methyltransferase-like OS=Nelumbo nucifera OX=4432 GN=LOC104590844 PE=3 SV=1	49	13	36	8	346	38.7	5.48	84.38	178.7	181.3	177.7	58.4	59.5	58.6	60	59	58.9	107.9
A0A1U7Z5Q6	60S acidic ribosomal protein P0 OS=Nelumbo nucifera OX=4432 GN=LOC104590633 PE=3 SV=1	31	8	35	5	320	34.2	5.44	96.52	105.9	104.9	106.7	99.4	97.1	97	99.8	96.4	95.9	97
A0A1U8A8A8	monodehydroascorbate reductase 5, mitochondrial OS=Nelumbo nucifera OX=4432 GN=LOC104600202 PE=4 SV=1	42	17	23	17	499	54.6	8.24	59.52	97.8	98.4	102.1	99.5	103.5	104.5	100.9	94.5	95.3	103.4
A0A1U8ASI6	60S ribosomal protein L13 OS=Nelumbo nucifera OX=4432 GN=LOC104606034 PE=3 SV=1	44	11	31	3	207	23.8	10.83	78.01	96.3	90.2	97.2	98.5	93.6	98	111.1	106.3	108.6	100.2
A0A1U7YTM0	stomatin-like protein 2, mitochondrial OS=Nelumbo nucifera OX=4432 GN=LOC104585783 PE=4 SV=1	43	17	28	17	426	46.7	7.05	63.65	90.1	95.2	90.2	99.8	101.1	100.9	101.2	104.7	103.6	113.1
A0A1U7YSV7	26S proteasome non-ATPase regulatory subunit 11 homolog OS=Nelumbo nucifera OX=4432 GN=LOC104586580 PE=4 SV=1	36	15	30	3	422	47.1	5.96	77.27	106	108.2	113.7	92.2	93.3	91.5	92.1	98.5	100.4	104.1
A0A1U8B8I8	phosphoglucomutase, chloroplastic isoform X1 OS=Nelumbo nucifera OX=4432 GN=LOC104608353 PE=4 SV=1	27	15	28	10	638	69.4	6.81	76.14	105	104.5	100	101.1	105.6	107.6	91.6	90.7	90.8	103.1
A0A1U8A4V0	Dihydrolipoamide acetyltransferase component of pyruvate dehydrogenase complex OS=Nelumbo nucifera OX=4432 GN=LOC104596764 PE=3 SV=1	28	9	21	7	489	50.9	8.78	59.49	128.9	131.8	124	87.1	87.9	91.9	80.1	80.5	84.7	103.1
A0A1U7ZI16	universal stress protein PHOS34-like isoform X1 OS=Nelumbo nucifera OX=4432 GN=LOC104590820 PE=4 SV=1	42	7	17	5	242	26.2	5	51.96	99.5	96.9	101	102.6	99.7	101.8	100.9	100.8	98.9	97.9
A0A1U7YWZ9	dihydroxy-acid dehydratase, chloroplastic OS=Nelumbo nucifera OX=4432 GN=LOC104587899 PE=3 SV=1	22	13	26	13	627	67.1	6.83	74.86	99.1	99.2	99.1	101.4	99.7	100.7	98.5	100.5	98.5	103.3
A0A1U8AEP4	Methyltransferase OS=Nelumbo nucifera OX=4432 GN=LOC104603677 PE=3 SV=1	39	14	28	14	361	40.6	7.24	70.97	137.9	140.7	137.9	84.3	85.6	82.1	75.8	76.2	76	103.3
A0A1U8A140	Proteasome subunit alpha type OS=Nelumbo nucifera OX=4432 GN=LOC104599160 PE=3 SV=1	41	11	22	6	250	27.2	7.09	58.45	103.2	100.2	100.3	105.4	105.6	108.3	92.9	91.8	91.1	101.3
A0A1U7Z363	ATP-dependent 6-phosphofructokinase OS=Nelumbo nucifera OX=4432 GN=LOC104589818 PE=3 SV=1	36	17	33	16	472	52.6	7.42	85.52	87.1	87.8	85.7	111.6	111.2	111	105.4	100.2	100.6	99.4
A0A1U7ZT88	puromycin-sensitive aminopeptidase-like OS=Nelumbo nucifera OX=4432 GN=LOC104596022 PE=4 SV=1	23	16	22	10	888	100.2	6.01	59.93	135.2	131.2	133.8	85.3	81.5	82	79.9	82.9	84.1	104
A0A1U8B9F8	2-dehydro-3-deoxyphosphooctonate aldolase OS=Nelumbo nucifera OX=4432 GN=LOC104608399 PE=3 SV=1	55	12	29	12	291	31.9	7.06	76.74	94	93.3	94	100.5	104.4	102.7	104.4	106.3	103	97.5
A0A1U7ZC61	protein TOPLESS-like isoform X1 OS=Nelumbo nucifera OX=4432 GN=LOC104592556 PE=4 SV=1	20	21	26	1	1137	125.4	7.08	62.62	126.5	125.3	124.5	86.8	91.3	87.7	83.6	84.6	83.3	106.5
A0A1U8B3K3	uncharacterized protein LOC104610448 OS=Nelumbo nucifera OX=4432 GN=LOC104610448 PE=4 SV=1	33	10	25	6	393	42	8.29	61.27	96.1	96.7	95.2	107.1	102	102.9	103	101.3	98.1	97.7
A0A1U8AEC3	protein CROWDED NUCLEI 1 isoform X1 OS=Nelumbo nucifera OX=4432 GN=LOC104603075 PE=4 SV=1	19	25	29	20	1239	142.1	5.12	59.11	98.6	97.3	94.5	98.6	101.9	96.8	102.9	100.9	104.3	104.1
A0A1U8A820	importin-5 OS=Nelumbo nucifera OX=4432 GN=LOC104597657 PE=4 SV=1	15	17	27	4	1116	123.6	5	65.25	116.2	118.1	108.1	99.4	96.8	94.9	93.3	89.2	80.9	103.1
A0A1U7ZJT3	golgin candidate 6 OS=Nelumbo nucifera OX=4432 GN=LOC104594690 PE=4 SV=1	23	18	27	18	917	101.1	4.88	63.03	115.6	115	116.9	94.6	94.7	96.4	88.2	91.3	84.4	102.8
A0A1U7YXU7	IAA-amino acid hydrolase ILR1-like 1 OS=Nelumbo nucifera OX=4432 GN=LOC104588209 PE=4 SV=1	31	11	21	11	452	49.5	6.01	56.69	103.7	100.2	102.2	98.5	99.7	95.8	100.1	101.8	99.8	98.1
A0A1U7ZQY1	Pyruvate dehydrogenase E1 component subunit beta OS=Nelumbo nucifera OX=4432 GN=LOC104592796 PE=4 SV=1	34	11	24	7	376	40.2	5.63	61.88	96.1	94.3	94	103	105.4	100.6	103.2	102.3	102.3	98.9
A0A1U7ZXI3	26S proteasome non-ATPase regulatory subunit 11 homolog isoform X1 OS=Nelumbo nucifera OX=4432 GN=LOC104598243 PE=4 SV=1	32	15	29	3	485	53.9	7.69	77.99	108	106.1	107.9	97.4	99	98.7	91.9	92.5	95.9	102.6
A0A1U7ZEM7	nuclear pore complex protein NUP50A-like OS=Nelumbo nucifera OX=4432 GN=LOC104592259 PE=4 SV=1	35	14	20	12	482	51.1	4.83	53.34	100.6	98.3	96.8	102.9	103.7	102.5	98	95.3	99.7	102.2
A0A1U7ZFZ0	Aspartate aminotransferase OS=Nelumbo nucifera OX=4432 GN=LOC104589736 PE=4 SV=1	39	13	29	11	422	47.1	7.74	74.99	98.9	100.6	99.6	100.7	98.9	96.7	104.9	101.1	100.2	98.4
A0A1U8AE53	FT-interacting protein 1-like OS=Nelumbo nucifera OX=4432 GN=LOC104603485 PE=4 SV=1	20	15	21	14	776	89.1	9.03	55.47	113.6	118.8	112	93.5	94.9	93.4	91.1	91.5	91.8	99.4
A0A1U7ZYK4	extracellular ribonuclease LE-like OS=Nelumbo nucifera OX=4432 GN=LOC104598986 PE=3 SV=1	36	8	30	6	249	28.2	6.86	78.44	150.6	145.5	149.8	76.5	76	75	73.3	75	75.2	103.3
A0A1U7Z718	calreticulin-3-like OS=Nelumbo nucifera OX=4432 GN=LOC104587015 PE=3 SV=1	37	15	25	5	429	50.5	5.92	59.87	101.6	101.8	105.2	99.9	102.6	99.4	95.3	98.2	95.5	100.4
A0A1U8AZB2	Pyruvate dehydrogenase E1 component subunit alpha OS=Nelumbo nucifera OX=4432 GN=LOC104607993 PE=4 SV=1	39	15	25	10	398	43.8	8.03	71.22	92.1	92.9	92.7	103	104.8	103.8	105.5	104	102.1	99
A0A1U7ZR55	methyl-CpG-binding domain-containing protein 11-like OS=Nelumbo nucifera OX=4432 GN=LOC104595408 PE=4 SV=1	56	18	22	15	346	38.3	5	51.07	97.8	96.5	95.2	103	100.7	102.7	102.8	100.1	101.3	99.9
A0A1U8A3Z9	mitochondrial outer membrane protein porin of 36 kDa-like OS=Nelumbo nucifera OX=4432 GN=LOC104596835 PE=4 SV=1	30	9	29	6	276	29.4	8.63	85.64	94.3	92.9	94.7	106.3	104.3	106.8	101	100.1	100.4	99.2
A0A1U7ZCJ1	nucleolar protein 56-like OS=Nelumbo nucifera OX=4432 GN=LOC104591672 PE=4 SV=1	28	14	23	7	564	62.9	8.43	58.81	113.8	115	109.8	92.7	97.4	95.3	96.1	90.6	90.4	98.8
A0A1U8A1D5	calcium-transporting ATPase 4, endoplasmic reticulum-type-like OS=Nelumbo nucifera OX=4432 GN=LOC104599233 PE=3 SV=1	22	19	24	11	1060	115.7	5.52	54.67	119.3	119.6	120.3	95.4	94.2	92.2	84.2	85	87.8	101.9
A0A1U7YY05	fumarate hydratase 1, mitochondrial-like OS=Nelumbo nucifera OX=4432 GN=LOC104589001 PE=3 SV=1	35	13	20	4	495	53.4	8.4	54.01	96.2	95.4	97.7	101.5	100.3	110.1	100.4	99.1	99.4	100.1
A0A1U7Z4Z5	2-alkenal reductase (NADP(+)-dependent)-like OS=Nelumbo nucifera OX=4432 GN=LOC104586797 PE=4 SV=1	42	10	26	7	346	38.2	7.5	68.75	111.4	112.5	108.3	89.4	95.5	96.6	89.8	94.2	97.6	104.7
A0A1U8AKX6	acetyl-CoA acetyltransferase, cytosolic 1-like isoform X1 OS=Nelumbo nucifera OX=4432 GN=LOC104605063 PE=3 SV=1	43	12	19	7	417	42.6	7.25	53.27	133.2	124.9	131.2	90.5	83.7	88.4	80.9	83.2	79.3	104.6
A0A1U8AKX3	Succinate-semialdehyde dehydrogenase OS=Nelumbo nucifera OX=4432 GN=LOC104605350 PE=3 SV=1	32	14	23	14	525	56.5	8.27	50.33	101.5	104	102.4	97.2	99.1	97	98.5	99.1	98.5	102.7
A0A1U8BKL7	UBP1-associated protein 2C OS=Nelumbo nucifera OX=4432 GN=LOC104612135 PE=4 SV=1	30	11	25	11	438	44.9	7.69	59.49	97.7	96.6	98.1	103.3	102.3	105.7	98.2	98.1	101	99.1
A0A1U8B6I2	CBS domain-containing protein CBSX3, mitochondrial-like OS=Nelumbo nucifera OX=4432 GN=LOC104610266 PE=4 SV=1	67	11	35	9	205	22.8	8.41	68.6	89.2	91.3	89.8	103	101.5	103.2	107.9	104.8	108.6	100.8
A0A1U7ZAA0	Glyceraldehyde-3-phosphate dehydrogenase OS=Nelumbo nucifera OX=4432 GN=LOC104592682 PE=3 SV=1	37	14	26	4	402	42.8	8.27	61.91	108.3	108	106.9	98.7	102.2	99.1	96.1	91	91.3	98.5
A0A1U7Z723	formate--tetrahydrofolate ligase OS=Nelumbo nucifera OX=4432 GN=LOC104587442 PE=3 SV=1	23	13	20	7	636	67.7	7.49	57.3	112.1	112	112.7	91.1	94.3	89.6	94.7	95.7	97.8	100
A0A1U8BCP8	40S ribosomal protein S3a OS=Nelumbo nucifera OX=4432 GN=LOC104609713 PE=3 SV=1	57	15	36	1	261	29.9	9.76	89.62	105.3	111.9	105.4	105.8	100.3	87.7	93.4	96.1	93.3	100.8
A0A1U8BK45	ATP synthase subunit gamma, mitochondrial-like OS=Nelumbo nucifera OX=4432 GN=LOC104611718 PE=3 SV=1	42	15	29	3	322	35.2	8.87	74.88	90.2	88.9	93.5	105.7	103.4	103.4	104.9	105.5	104.9	99.6
A0A1U8A3E6	uncharacterized protein LOC104599822 OS=Nelumbo nucifera OX=4432 GN=LOC104599822 PE=4 SV=1	80	7	38	7	80	8.2	4.88	100.6	54	54.1	55.5	126.6	123.8	125	122.3	122.8	122.1	93.8
A0A1U8B479	eukaryotic translation initiation factor 2 subunit gamma-like OS=Nelumbo nucifera OX=4432 GN=LOC104610645 PE=4 SV=1	36	14	24	14	464	50.7	8.78	58.11	108.1	109.3	109.4	101.7	98.6	100.9	88.5	92.1	91.2	100.1
A0A1U8AF45	ras-related protein RABC1 OS=Nelumbo nucifera OX=4432 GN=LOC104599566 PE=4 SV=1	56	11	22	9	209	23.3	5.82	64.53	79.1	78.9	80.6	112.8	109.5	111.5	109.4	112.8	108.8	96.7
A0A1U7ZBV6	110 kDa U5 small nuclear ribonucleoprotein component CLO OS=Nelumbo nucifera OX=4432 GN=LOC104588504 PE=4 SV=1	29	22	31	21	989	110.5	5.11	54.83	100.5	101.9	100.4	100.8	101.9	98.8	94.4	99.5	98.5	103.3
A0A1U8A9K7	26S proteasome non-ATPase regulatory subunit 1 homolog OS=Nelumbo nucifera OX=4432 GN=LOC104602194 PE=3 SV=1	15	15	25	6	1015	110.6	5.43	64.97	106.1	108.8	111.6	96.2	98.9	102.4	91.2	89.1	97.3	98.3
A0A1U7Z5B7	monodehydroascorbate reductase OS=Nelumbo nucifera OX=4432 GN=LOC104586919 PE=4 SV=1	44	19	31	12	434	47.1	6.95	78.26	119.3	120.7	119.2	89.5	90	88.4	91.8	89.6	89.4	102.1
A0A1U8AZ71	eukaryotic translation initiation factor-like OS=Nelumbo nucifera OX=4432 GN=LOC104609132 PE=4 SV=1	26	18	27	14	806	88.7	8.12	64.15	115.8	115.7	114.9	95.6	91.1	94.4	86.8	89.1	90.8	105.8
A0A1U8BIJ8	binding partner of ACD11 1-like OS=Nelumbo nucifera OX=4432 GN=LOC104611474 PE=4 SV=1	44	13	24	11	279	29.7	6.96	59.15	101.3	102.8	103	99.4	100.8	98.6	98.1	99.6	99.1	97.4
A0A1U7YXJ9	bifunctional protein FolD 2 isoform X1 OS=Nelumbo nucifera OX=4432 GN=LOC104587043 PE=3 SV=1	51	12	20	11	299	32	6.99	51.65	104.4	108.6	102.7	95.8	97.6	100	96	100.6	94.7	99.7
A0A1U8ALR6	anthocyanin 5-aromatic acyltransferase-like OS=Nelumbo nucifera OX=4432 GN=LOC104605599 PE=4 SV=1	29	14	23	14	492	54.5	6.48	58.55	76.3	75.8	76.4	110.9	111.1	110.8	114.5	114.7	111.4	98.1
A0A1U8A963	protein gar2-like isoform X1 OS=Nelumbo nucifera OX=4432 GN=LOC104602057 PE=4 SV=1	36	16	20	1	770	84.3	6.61	38.23	105.6	111.2	91.2	95.8	124.3	91.1	93.2	87.4	105.4	95
A0A1U8BNT8	14-3-3-like protein D isoform X2 OS=Nelumbo nucifera OX=4432 GN=LOC104613114 PE=3 SV=1	54	16	39	5	261	29.4	4.92	92.91	121.4	113.5	117.6	97.5	92.2	93.1	91.4	87	87.1	99.3
A0A1U7ZPW7	SNF1-related protein kinase regulatory subunit gamma-like PV42a OS=Nelumbo nucifera OX=4432 GN=LOC104592476 PE=4 SV=1	38	10	31	10	377	40.9	6.27	85.64	66.6	67.6	68.2	110.7	111.3	113.6	124.2	120.4	119.6	97.9
A0A1U8AXV2	2S sulfur-rich seed storage protein 2-like OS=Nelumbo nucifera OX=4432 GN=LOC104604988 PE=4 SV=1	45	7	58	7	139	16	6.76	106.01	102.4	102.8	100.6	94.5	93.6	96.1	104.1	104.7	99.5	101.7
A0A1U7Z8B4	probable cysteine protease RD19D OS=Nelumbo nucifera OX=4432 GN=LOC104587380 PE=3 SV=1	36	10	18	10	370	40.5	7.93	55.1	131.9	133.2	139.9	81.7	81.1	80.3	80	83.5	82.5	106
A0A1U8AEB9	Citrate synthase OS=Nelumbo nucifera OX=4432 GN=LOC104603546 PE=3 SV=1	34	13	28	13	469	52	8.19	78.62	93.9	93.8	94.7	109.1	106.7	108	99.2	98	97.5	98.9
A0A1U8A0H9	ras-related protein RABA1f OS=Nelumbo nucifera OX=4432 GN=LOC104599511 PE=4 SV=1	64	15	24	9	217	24.2	6.24	70.15	115.5	113.7	117.9	95.2	92	95.4	90.6	89.3	90	100.4
A0A1U8AHB1	protein BOBBER 1 OS=Nelumbo nucifera OX=4432 GN=LOC104604013 PE=4 SV=1	37	14	28	14	315	35.9	5.64	66.48	120.6	119.3	119.3	95.2	95.5	94.8	85.4	83.6	84.1	102.1
A0A1U8AIW1	protein FLX-like 2 OS=Nelumbo nucifera OX=4432 GN=LOC104600694 PE=4 SV=1	45	16	23	16	420	45	7.3	65.07	97.1	101	97.2	95.3	102.8	100.7	96.6	99.7	105.5	104.3
A0A1U8PYH3	ubiquitin carboxyl-terminal hydrolase 13-like isoform X1 OS=Nelumbo nucifera OX=4432 GN=LOC104587807 PE=4 SV=1	40	15	25	3	389	45.7	5.87	62.38	107.3	115.7	94.6	97.4	101.7	89.1	92.8	105.2	89.9	106.1
A0A1U7ZK07	GTP-binding nuclear protein OS=Nelumbo nucifera OX=4432 GN=LOC104595326 PE=3 SV=1	42	9	26	9	221	25.1	6.93	80.48	102.6	99.3	103.2	99.9	100.2	97.9	98.7	100.4	98.5	99.2
A0A1U8AG24	pentatricopeptide repeat-containing protein At3g49240 OS=Nelumbo nucifera OX=4432 GN=LOC104604026 PE=4 SV=1	30	15	21	15	651	72.5	5.62	54.45	103.5	105.9	103.3	99.5	97.7	99.7	98.6	94.7	95.7	101.3
A0A1U7ZTC9	DEAD-box ATP-dependent RNA helicase 37-like OS=Nelumbo nucifera OX=4432 GN=LOC104597630 PE=4 SV=1	29	16	25	2	622	66.9	8.29	54.18	92.3	106.9	102.6	88.3	112.9	105	101.3	91	106.6	93.2
A0A1U8AXD2	nuclear pore complex protein NUP155 OS=Nelumbo nucifera OX=4432 GN=LOC104607410 PE=4 SV=1	20	22	25	22	1490	163.2	5.9	44.22	107.1	108.6	107.9	98.6	95.6	97.5	95.2	96.6	91.8	101
A0A1U7YRR6	Catalase OS=Nelumbo nucifera OX=4432 GN=LOC104587122 PE=3 SV=1	32	12	33	6	492	57	7.39	75.96	127	123.8	127.7	91.1	86.8	85.8	86.2	80.7	86.2	104.8
A0A1U7Z5Q5	oleosin 18.2 kDa-like OS=Nelumbo nucifera OX=4432 GN=LOC104591464 PE=4 SV=1	26	4	32	4	155	16.2	9.92	80.85	90.5	91.3	90.9	93.2	93.2	95.5	119.7	113.6	112.7	99.3
A0A1U7ZGX7	13S globulin basic chain-like OS=Nelumbo nucifera OX=4432 GN=LOC104594449 PE=4 SV=1	26	6	41	1	328	37.1	5.33	117.76	69.6	67.4	68.7	112	115.7	114.8	122.8	126	112.5	90.6
A0A1U7ZD74	Signal recognition particle subunit SRP68 OS=Nelumbo nucifera OX=4432 GN=LOC104591856 PE=3 SV=1	34	20	26	20	601	68.1	8.9	61.89	103.1	103.6	104.3	98	99.9	98.2	95.7	97	95.9	104.1
A0A1U7ZGZ9	Glucose-6-phosphate 1-epimerase OS=Nelumbo nucifera OX=4432 GN=LOC104590463 PE=3 SV=1	57	15	32	15	314	35.5	6.27	66.66	97.2	97.1	98.3	101.3	102.6	103.6	100.4	98.9	100.3	100.3
A0A1U8AEH2	Proteasome subunit alpha type OS=Nelumbo nucifera OX=4432 GN=LOC104603613 PE=3 SV=1	46	11	22	2	249	27.2	7.44	70.4	106.4	104.6	106.7	97.5	96.1	96.9	99	99.3	95.8	97.6
A0A1U8AS68	putative per-hexamer repeat protein 5 isoform X1 OS=Nelumbo nucifera OX=4432 GN=LOC104603538 PE=4 SV=1	35	3	38	3	219	20.5	4.22	116.71	76.2	74.2	76	116.8	115.9	112.6	101.2	107.9	122.5	96.7
A0A1U7ZAY2	60S ribosomal protein L6 OS=Nelumbo nucifera OX=4432 GN=LOC104591219 PE=3 SV=1	47	13	40	7	233	26.1	10.13	83.51	107	101.6	107.9	96.6	96.9	94.4	100.8	100.4	97.3	97.1
A0A1U7ZPY3	RuvB-like helicase OS=Nelumbo nucifera OX=4432 GN=LOC104592893 PE=3 SV=1	33	12	20	5	456	49.9	5.82	51.03	113.1	109.8	104.4	95.5	97.5	97.8	95.7	94.7	91.3	100.3
A0A1U8A817	14-3-3-like protein GF14 iota OS=Nelumbo nucifera OX=4432 GN=LOC104597967 PE=3 SV=1	53	14	31	5	259	29.5	4.88	62.4	119.5	119.1	115.7	93.8	86.9	94.4	90.7	88.5	93	98.4
A0A1U7ZC42	pyrophosphate-energized vacuolar membrane proton pump OS=Nelumbo nucifera OX=4432 GN=LOC104592540 PE=3 SV=1	19	14	23	4	765	80	5.4	62.28	136.8	136.2	141.5	84.1	85.4	90.6	73.6	74.5	71.6	105.6
A0A1U7ZX11	4-hydroxy-3-methylbut-2-en-1-yl diphosphate synthase (Ferredoxin), chloroplastic OS=Nelumbo nucifera OX=4432 GN=LOC104594845 PE=3 SV=1	29	21	28	21	740	82.2	6.34	60.16	111.4	108.5	109.3	100.4	99.8	99.4	87.3	89.8	90.4	103.7
A0A1U7Z9J1	DNA damage-binding protein 1 OS=Nelumbo nucifera OX=4432 GN=LOC104590707 PE=4 SV=1	17	19	27	5	1089	121.3	5.27	62.08	105.6	103.6	104.3	100.5	99.5	101.8	93.9	96.5	94.3	100
A0A1U7ZZP6	N-alpha-acetyltransferase 16, NatA auxiliary subunit-like isoform X1 OS=Nelumbo nucifera OX=4432 GN=LOC104595258 PE=4 SV=1	18	16	24	3	903	103.4	7.3	55.64	103.8	116.5	101.9	95.3	89.6	97.9	104.8	99.8	90	100.6
A0A1U8B6I0	la protein 1 OS=Nelumbo nucifera OX=4432 GN=LOC104607803 PE=4 SV=1	34	16	21	16	481	53	5.63	45.57	126.7	123.3	126.2	88.4	91	90.7	82.8	84	83.8	103.3
A0A1U7YWM4	topless-related protein 1-like isoform X1 OS=Nelumbo nucifera OX=4432 GN=LOC104588592 PE=4 SV=1	18	20	25	1	1162	128.3	7.39	59.57
A0A1U7YUW2	flagellar radial spoke protein 5 isoform X2 OS=Nelumbo nucifera OX=4432 GN=LOC104588073 PE=4 SV=1	31	11	22	11	415	46.6	8.29	60.84	98	97.5	97.2	106.6	104.5	103	96.4	98.4	97.6	100.9
A0A1U8AJK4	heme-binding-like protein At3g10130, chloroplastic OS=Nelumbo nucifera OX=4432 GN=LOC104601174 PE=4 SV=1	60	10	25	3	204	22.6	8.62	57.29	75	71.2	62.1	117.7	118.5	114.3	108.7	116.7	117.7	98.2
A0A1U8AQK4	fruit protein pKIWI501-like OS=Nelumbo nucifera OX=4432 GN=LOC104606555 PE=4 SV=1	81	8	19	8	165	17.7	3.89	55.32	159.6	156.8	159.5	69.9	67.4	69	70.6	70	72	105.1
A0A1U7YV21	protein TPR2-like OS=Nelumbo nucifera OX=4432 GN=LOC104587269 PE=4 SV=1	20	20	25	4	1138	125.3	7.25	55.68	120.1	117.9	122.4	92	94.8	90.4	86.2	86.6	88.8	100.9
A0A1U8A8M3	KH domain-containing protein At4g18375-like isoform X2 OS=Nelumbo nucifera OX=4432 GN=LOC104598099 PE=4 SV=1	36	16	28	12	547	58.3	6.95	68.45	95.5	96	92.9	107.3	109.6	106.8	97.9	98.6	95.5	99.9
A0A1U8BAS6	probable plastid-lipid-associated protein 3, chloroplastic OS=Nelumbo nucifera OX=4432 GN=LOC104611470 PE=4 SV=1	32	11	27	8	446	48.5	5.01	73.79	97.8	96.6	101.8	101.3	100.1	99.7	102.2	100.3	103.1	97.3
A0A1U7ZP21	Fructose-bisphosphate aldolase OS=Nelumbo nucifera OX=4432 GN=LOC104592611 PE=3 SV=1	37	13	30	7	393	42.8	8.02	68.89	86	86.9	88.8	108	110.5	114.9	105.8	102.5	95	101.6
A0A1U8ALI0	ferredoxin--nitrite reductase, chloroplastic OS=Nelumbo nucifera OX=4432 GN=LOC104601782 PE=4 SV=1	27	15	23	15	592	66.2	7.09	56.61	157.9	156.9	152.4	67	69.4	67	74.6	72.7	73.7	108.5
A0A1U7ZUG9	fumarylacetoacetase-like OS=Nelumbo nucifera OX=4432 GN=LOC104594147 PE=4 SV=1	33	11	30	11	420	45.9	6.47	64.9	104.4	102	102.9	99.9	100	98.3	95.9	98.2	99.2	99.2
A0A1U7ZD76	Probable 6-phosphogluconolactonase OS=Nelumbo nucifera OX=4432 GN=LOC104593440 PE=3 SV=1	39	9	29	8	260	28.7	5.26	83.31	63	62.2	65.1	123.2	123.7	127.6	111.1	113.5	110.6	100
A0A1U8AFD0	40S ribosomal protein S12 OS=Nelumbo nucifera OX=4432 GN=LOC104603431 PE=3 SV=1	58	7	26	3	140	14.7	5.77	89.39	106.9	109.4	111.5	98.6	92.8	96.3	96.7	97	90.6	100.1
A0A1U7Z3V2	Eukaryotic translation initiation factor 3 subunit C OS=Nelumbo nucifera OX=4432 GN=LOC104588972 PE=3 SV=1	20	22	27	6	944	106.6	5.49	55.02	79.5	80	81.8	103.1	105.3	111.2	112.8	111.9	114	100.6
A0A1U8AH92	Ribulose bisphosphate carboxylase small chain OS=Nelumbo nucifera OX=4432 GN=LOC104602957 PE=3 SV=1	38	9	24	9	182	20.3	8.87	64.33	97.3	94.7	95.4	103	103.2	104.8	101.3	103.1	98.6	98.7
A0A1U8A889	ubiquitin receptor RAD23c-like isoform X1 OS=Nelumbo nucifera OX=4432 GN=LOC104601781 PE=4 SV=1	39	11	22	5	387	41.1	4.81	61.86	92.4	93.2	89.5	102.3	102.9	105.8	102	105.8	105.9	100.3
A0A1U7Z541	uncharacterized protein LOC104586387 isoform X1 OS=Nelumbo nucifera OX=4432 GN=LOC104586387 PE=4 SV=1	22	17	20	17	980	106.4	4.72	51.26	94.8	94.3	94.9	102.7	103.4	104.2	103.8	101.3	101.9	98.8
A0A1U8AY48	Lon protease homolog, mitochondrial OS=Nelumbo nucifera OX=4432 GN=LOC104605082 PE=3 SV=1	19	17	20	8	995	110	5.62	49.63	99	99.5	95.1	102	103.7	103.9	97.1	98.3	97.7	103.7
A0A1U8AV51	protein EARLY-RESPONSIVE TO DEHYDRATION 7, chloroplastic OS=Nelumbo nucifera OX=4432 GN=LOC104604240 PE=4 SV=1	32	12	18	12	477	51.2	5.94	50.52	79.6	89.2	80.2	99.7	122.7	102.3	106	114.7	110.8	94.8
A0A1U7ZCS2	probable glutathione S-transferase parC OS=Nelumbo nucifera OX=4432 GN=LOC104588759 PE=3 SV=1	35	15	40	15	219	25.4	6.9	83.23	118.1	116.9	115.8	97.7	97.8	99.1	85.4	85.1	84	100.3
A0A1U8AH41	40S ribosomal protein S7 OS=Nelumbo nucifera OX=4432 GN=LOC104602921 PE=3 SV=1	48	7	32	4	191	22.2	9.8	81.96	108.7	108.1	106.8	94.2	92	93.2	98.2	96.2	99.3	103.3
A0A1U7YSG3	stem-specific protein TSJT1-like OS=Nelumbo nucifera OX=4432 GN=LOC104586437 PE=4 SV=1	32	7	26	3	254	28.2	7.14	74	57.1	56.7	55.9	116.6	117.8	118.2	124	130.5	123.7	99.6
A0A1U8A0H7	glutathione S-transferase-like OS=Nelumbo nucifera OX=4432 GN=LOC104598999 PE=3 SV=1	38	8	41	6	297	33.1	7.53	99.46	73.8	71.7	73.7	114.3	111.7	114.5	115.6	117.2	111.4	96
A0A1U8AXN0	glutamine--tRNA ligase OS=Nelumbo nucifera OX=4432 GN=LOC104608516 PE=3 SV=1	30	19	26	19	792	90.8	6.57	62.93	127.8	125.8	125.7	86.4	89.9	90.9	82.9	82.1	83.2	105.2
A0A1U8AEI3	Eukaryotic translation initiation factor 3 subunit D OS=Nelumbo nucifera OX=4432 GN=LOC104599405 PE=3 SV=1	35	13	21	3	565	64.1	5.24	52.95	101.5	105.8	105.9	92.5	99	94.9	99.7	99.3	99.7	101.8
A0A1U8AF52	BAG family molecular chaperone regulator 7-like OS=Nelumbo nucifera OX=4432 GN=LOC104602299 PE=4 SV=1	22	8	20	8	416	46.8	9.2	57.09	89.6	85.3	90.2	106.6	107.8	107.9	104.9	105.5	104.6	97.6
A0A1U8A8U7	UDP-arabinopyranose mutase 3 OS=Nelumbo nucifera OX=4432 GN=LOC104597894 PE=4 SV=1	44	13	26	7	358	40.7	5.96	57.08	116.8	116.1	118.9	93.2	95.4	92.6	91.3	86.2	88.7	100.8
A0A1U8AB00	heterogeneous nuclear ribonucleoprotein R-like isoform X3 OS=Nelumbo nucifera OX=4432 GN=LOC104602057 PE=4 SV=1	36	16	20	1	769	84.2	6.61	35.28	105.7	106	105.3	96.9	101.6	99.7	89.9	94.2	99.8	101.1
A0A1U8A2E1	MICOS complex subunit MIC60 OS=Nelumbo nucifera OX=4432 GN=LOC104600074 PE=3 SV=1	25	14	18	14	646	70.5	5.05	42.94	93.6	95.9	92.9	106.7	99.9	100.5	103.4	102.7	105.1	99.3
A0A1U8AA04	Acetyltransferase component of pyruvate dehydrogenase complex OS=Nelumbo nucifera OX=4432 GN=LOC104600658 PE=3 SV=1	30	15	25	7	570	61.7	6.57	60.25	91.4	93.3	96.2	104.4	98.1	101	108.4	106.1	99.6	101.5
A0A1U8B0G5	UDP-glucose:glycoprotein glucosyltransferase isoform X1 OS=Nelumbo nucifera OX=4432 GN=LOC104608299 PE=4 SV=1	13	21	27	21	1642	185.1	6.29	56.38	107.8	107.9	109.6	98.6	95.2	94.1	94.2	95.5	95.8	101.3
A0A1U8Q7W7	macrophage migration inhibitory factor homolog isoform X1 OS=Nelumbo nucifera OX=4432 GN=LOC104602505 PE=4 SV=1	36	3	21	3	121	13	8	47.3	110.6	108	111.8	97.8	90.8	95.1	96.2	91	94.2	104.7
A0A1U7ZU47	nascent polypeptide-associated complex subunit alpha-like protein 1 OS=Nelumbo nucifera OX=4432 GN=LOC104593640 PE=4 SV=1	44	5	21	1	203	22.3	4.49	55.28	117.4	115.8	121.7	93.1	90.3	91.2	91.9	90.7	87.6	100.4
A0A1U8Q6P3	Eukaryotic translation initiation factor 3 subunit H OS=Nelumbo nucifera OX=4432 GN=LOC104599695 PE=3 SV=1	40	11	18	5	338	38.8	4.78	52.37	103.7	100	101.4	98.5	97.3	98.1	98.8	101.7	99.4	101.3
A0A1U8B630	15.7 kDa heat shock protein, peroxisomal OS=Nelumbo nucifera OX=4432 GN=LOC104607385 PE=3 SV=1	68	11	28	11	141	15.9	7.4	76.47	133.6	131.5	136.8	84.1	81.9	87.7	81.1	80.8	79.3	103.2
A0A1U8A416	uncharacterized oxidoreductase At4g09670 OS=Nelumbo nucifera OX=4432 GN=LOC104600013 PE=4 SV=1	39	12	23	12	360	39.6	6.8	66.77	99.1	97.8	99.3	102.9	103.5	101.5	98.4	100.5	97.7	99.4
A0A1U8ACR4	Proteasome subunit alpha type OS=Nelumbo nucifera OX=4432 GN=LOC104601560 PE=3 SV=1	44	11	23	6	250	27.3	7.81	53.03	96.4	96.3	94.5	103.4	106.6	103.9	95.7	102.2	97.8	103
A0A1U8AGJ2	nascent polypeptide-associated complex subunit alpha-like protein 1 OS=Nelumbo nucifera OX=4432 GN=LOC104604183 PE=4 SV=1	44	5	23	1	203	22.2	4.49	61.9	112	108.4	105.1	99.3	94.8	85.3	92.4	98.7	106.8	97.1
A0A1U7Z9M6	protein TOPLESS-like OS=Nelumbo nucifera OX=4432 GN=LOC104592477 PE=4 SV=1	18	20	25	5	1128	124.4	7.17	59.59	101.4	101.7	101.6	103.9	105.2	99	97.1	96.7	93.3	100.1
A0A1U7ZRE5	tryptophan--tRNA ligase, cytoplasmic OS=Nelumbo nucifera OX=4432 GN=LOC104596526 PE=3 SV=1	38	13	20	13	400	45.7	6.48	56.37	93.2	95	93.1	105.5	108.7	112	93.8	95.5	99.2	104.1
A0A1U7ZQX2	60S ribosomal protein L9-like OS=Nelumbo nucifera OX=4432 GN=LOC104593115 PE=4 SV=1	54	10	37	6	193	21.9	9.61	93.47	95.6	96.1	98.8	105.3	104	105	99.2	96.8	98.6	100.7
A0A1U8AUT7	probable glucan 1,3-alpha-glucosidase OS=Nelumbo nucifera OX=4432 GN=LOC104606656 PE=3 SV=1	21	17	27	17	945	107.2	6.28	58.48	109.9	111.6	109.1	94.4	97.1	95.6	94.8	89.8	90.9	106.7
A0A1U7ZPB4	uncharacterized protein LOC104592737 OS=Nelumbo nucifera OX=4432 GN=LOC104592737 PE=3 SV=1	31	13	27	13	439	48.2	6.71	68.94	145.6	141.1	145.3	80.4	76.8	78.7	77.8	75.9	73.9	104.6
A0A1U8ADR4	ATP synthase subunit gamma OS=Nelumbo nucifera OX=4432 GN=LOC104599179 PE=3 SV=1	44	15	27	3	322	35	8.88	61.61	94	89.3	94.5	109	106.7	105.8	97.6	104.8	106.4	91.9
A0A1U8AXV4	RuvB-like helicase OS=Nelumbo nucifera OX=4432 GN=LOC104608737 PE=3 SV=1	34	14	20	14	467	51.7	5.48	52.68	104.3	112.1	103.5	101.1	102.5	98.4	86.6	91.1	99.1	101.2
A0A1U8AQ02	ras-related protein RABH1b OS=Nelumbo nucifera OX=4432 GN=LOC104606418 PE=4 SV=1	53	11	24	10	208	23	7.9	72.13	122.3	121.3	120.8	92.1	90.9	89.8	86.9	87.2	86.3	102.5
A0A1U7ZUP0	probable mitochondrial-processing peptidase subunit beta, mitochondrial OS=Nelumbo nucifera OX=4432 GN=LOC104597978 PE=3 SV=1	31	15	23	8	528	58.6	7.21	59.84	102.4	99	97.4	97.9	100.3	100.1	101.3	100	102	99.7
A0A1U7ZT20	zinc finger CCCH domain-containing protein 14 OS=Nelumbo nucifera OX=4432 GN=LOC104597553 PE=4 SV=1	42	11	19	7	306	31.6	9.16	57	105.3	104.6	105.2	96.3	98.9	97.4	94.1	99.6	97.7	100.9
A0A1U7ZLY6	adenylate kinase 4 OS=Nelumbo nucifera OX=4432 GN=LOC104591668 PE=3 SV=1	51	15	31	5	246	26.9	7.46	61.76	103.3	104.1	103.4	99.5	97.4	105.8	93.5	97.5	97	98.3
A0A1U7ZBI3	NADH-cytochrome b5 reductase OS=Nelumbo nucifera OX=4432 GN=LOC104592380 PE=3 SV=1	36	12	29	12	327	36.1	9.17	62.78	96.3	98.5	98	101.9	100.5	101	103.6	102.3	101.1	96.8
A0A1U7YQH8	18.2 kDa class I heat shock protein-like OS=Nelumbo nucifera OX=4432 GN=LOC104585845 PE=3 SV=1	48	10	78	7	160	18.2	6.09	170.79	69.8	70.7	71.3	119.6	114.6	117.8	115	112	113.4	95.8
A0A1U7ZBE0	KH domain-containing protein At4g18375-like OS=Nelumbo nucifera OX=4432 GN=LOC104588765 PE=4 SV=1	28	13	24	8	626	66.7	6.81	57.54	110	102.3	111.5	95.7	94	93.3	98.3	99.4	93.5	102.1
A0A1U7ZMX0	vacuolar-sorting receptor 1-like isoform X1 OS=Nelumbo nucifera OX=4432 GN=LOC104594477 PE=4 SV=1	36	19	30	14	623	69.4	5.76	72.25	140.4	140	139	79.8	80.8	80	75.5	79.1	80.8	104.5
A0A1U8B2H1	trifunctional UDP-glucose 4,6-dehydratase/UDP-4-keto-6-deoxy-D-glucose 3,5-epimerase/UDP-4-keto-L-rhamnose-reductase RHM1 OS=Nelumbo nucifera OX=4432 GN=LOC104608978 PE=4 SV=1	33	21	27	21	676	76.4	7.69	58.27	128.1	125	125.6	86.6	87.2	89.7	84.7	85.7	84.4	103
A0A1U8AB69	Chorismate synthase OS=Nelumbo nucifera OX=4432 GN=LOC104602632 PE=3 SV=1	28	12	25	12	437	47.3	9.04	64.06	116.5	117.4	113.5	85.7	88.4	89.8	95.1	95.5	97.3	100.7
A0A1U7ZL83	Proteasome subunit alpha type OS=Nelumbo nucifera OX=4432 GN=LOC104595653 PE=3 SV=1	55	14	24	6	261	29	5.68	64.15	100.8	103	101.8	99.2	99.7	99	99	97.8	97.1	102.5
A0A1U7YZA1	eukaryotic initiation factor 4A-3 OS=Nelumbo nucifera OX=4432 GN=LOC104587558 PE=4 SV=1	28	14	24	11	410	46.3	6.47	63.75	103.5	104.8	104.1	97.6	94.6	101.8	91.2	88.8	94.4	119.1
A0A1U7ZWS7	AT-rich interactive domain-containing protein 1A-like OS=Nelumbo nucifera OX=4432 GN=LOC104597038 PE=4 SV=1	14	20	25	20	1660	181.5	7.09	59.42	95.5	98.1	94.6	102.3	102.1	104.5	96.3	99.5	101.3	106
A0A1U7ZLP1	Glyceraldehyde-3-phosphate dehydrogenase OS=Nelumbo nucifera OX=4432 GN=LOC104591924 PE=3 SV=1	37	14	24	4	402	42.8	8.03	54.64	108.5	91.4	102	99	112.8	110.5	93.8	100.7	87.7	93.5
A0A1U8A2I7	Eukaryotic translation initiation factor 3 subunit M OS=Nelumbo nucifera OX=4432 GN=LOC104599552 PE=3 SV=1	46	14	21	14	410	46.3	5.29	46.68	109	113	110.8	94	97.5	98.6	92.4	94.3	90.6	99.8
A0A1U8AGR5	ABC transporter F family member 4 OS=Nelumbo nucifera OX=4432 GN=LOC104600385 PE=4 SV=1	24	14	21	14	727	80.9	6.24	42.54	114.9	112.8	114.2	92.4	93.5	91.3	94.1	92.4	91.9	102.6
A0A1U7YV53	uncharacterized protein LOC104588174 isoform X1 OS=Nelumbo nucifera OX=4432 GN=LOC104588174 PE=4 SV=1	26	12	23	1	653	73.1	5.08	53.67	76.1	84.7	86.5	103.4	104.8	97.4	117.4	119.1	118.1	92.4
A0A1U8A6X4	Histone H4 OS=Nelumbo nucifera OX=4432 GN=LOC104600836 PE=3 SV=1	52	7	42	7	103	11.4	11.47	100.37	99.6	98.2	96.4	98.2	100.6	103.2	100.2	99.8	103.5	100.2
A0A1U7ZVD0	Glucose-1-phosphate adenylyltransferase OS=Nelumbo nucifera OX=4432 GN=AGPS1 PE=3 SV=1	37	18	26	18	593	65.2	7.15	52.13	121.4	120.2	122.3	92.3	89.4	88	88.2	91.1	87.1	100.1
A0A1U8A9Z3	40S ribosomal protein S7 OS=Nelumbo nucifera OX=4432 GN=LOC104602332 PE=3 SV=1	48	7	30	3	191	22.2	9.8	82.5	109.1	104.1	106.3	93.7	97.1	99.6	97.3	95.6	97.6	99.6
A0A1U7ZJA4	ER membrane protein complex subunit 1 isoform X1 OS=Nelumbo nucifera OX=4432 GN=LOC104595143 PE=4 SV=1	20	16	24	16	989	110.5	6.58	43.62	111.2	109	110.6	95.3	100.5	96.1	91.6	90.2	91.6	103.8
A0A1U8B9K0	Tubulin beta chain OS=Nelumbo nucifera OX=4432 GN=LOC104608696 PE=3 SV=1	28	10	28	5	443	50	4.94	76.37	139.3	140.4	139.2	85	78.3	82	80.7	78.6	73.5	102.9
A0A1U8A3G1	dihydrolipoyl dehydrogenase 2, chloroplastic isoform X1 OS=Nelumbo nucifera OX=4432 GN=LOC104598802 PE=3 SV=1	31	16	22	6	629	67.4	8.53	59.89	127.2	134.5	133.9	83.5	85.6	84.3	85.2	82.3	80.7	103
A0A1U7ZHU0	GrpE protein homolog OS=Nelumbo nucifera OX=4432 GN=LOC104594136 PE=3 SV=1	39	11	24	8	305	33.9	5.78	51.44	78.6	81.2	80.5	106.6	109.3	107.2	111.7	112.9	115.8	96.2
A0A1U7ZFF5	Glutamine synthetase OS=Nelumbo nucifera OX=4432 GN=LOC104592454 PE=3 SV=1	42	11	24	9	356	39.2	5.88	60.53	104.1	100.4	105.3	100.2	101.5	101	92.5	97.5	97.4	100.2
A0A1U7ZK65	DEAD-box ATP-dependent RNA helicase 56 OS=Nelumbo nucifera OX=4432 GN=LOC104595377 PE=4 SV=1	38	15	35	2	428	48.3	5.64	75.01	119.6	116.3	118.5	100.5	88.5	98	89.6	83.3	89.1	96.6
A0A1U8AE06	actin-related protein 4 OS=Nelumbo nucifera OX=4432 GN=LOC104599561 PE=3 SV=1	38	13	18	13	445	49.3	5.43	45.22	105.8	101.8	102.4	97.4	98.1	100.3	100.2	98.9	97.3	97.9
A0A1U8A957	alanine aminotransferase 2-like OS=Nelumbo nucifera OX=4432 GN=LOC104600451 PE=4 SV=1	34	15	25	9	528	57.4	7.87	67.51	89.2	87.5	89.6	105.3	104	110.1	104.7	102.1	105.8	101.8
A0A1U8BBI0	20 kDa chaperonin, chloroplastic-like OS=Nelumbo nucifera OX=4432 GN=LOC104609297 PE=3 SV=1	45	10	23	5	254	26.8	8.69	78.25	106.5	103.5	107.6	97.1	101.3	97.7	94.2	97.2	96	99
A0A1U7Z445	60S ribosomal protein L8 OS=Nelumbo nucifera OX=4432 GN=LOC104590116 PE=4 SV=1	41	13	47	1	261	28.2	10.8	106.23	100.1	79.6	95.2	100.7	101.2	92.8	106.7	116.2	116.1	91.5
A0A1U7YTG7	60S ribosomal protein L8-like OS=Nelumbo nucifera OX=4432 GN=LOC104585734 PE=3 SV=1	41	13	48	1	261	28.2	10.9	108.62	104	102	103.9	97	95.4	95.2	102	101.1	101.7	97.6
Q3LV68	Superoxide dismutase OS=Nelumbo nucifera OX=4432 GN=MnSOD PE=2 SV=2	42	10	39	10	233	25.9	7.12	91.58	89.6	92	90.3	106.5	104.4	106.9	104.1	103.3	102.2	100.7
A0A1U7ZEB3	Eukaryotic translation initiation factor 3 subunit L OS=Nelumbo nucifera OX=4432 GN=LOC104592171 PE=3 SV=1	35	16	27	16	525	61.8	5.95	62.79	103	102.5	104	97.4	102.7	100.1	95.3	96.3	96.1	102.6
A0A1U8A7Z9	cytosolic enolase 3 isoform X1 OS=Nelumbo nucifera OX=4432 GN=LOC104601180 PE=3 SV=1	27	9	22	9	474	51.6	6.05	55.21	108.7	107.7	109.4	97.6	95.1	97.7	94.7	94.7	95.7	98.7
A0A1U8AJM8	acetyl-coenzyme A carboxylase carboxyl transferase subunit alpha, chloroplastic-like OS=Nelumbo nucifera OX=4432 GN=LOC104601192 PE=3 SV=1	29	20	28	16	773	86.1	6.83	49.28	131.6	131	135.1	85.9	83.3	84.9	81.3	81.4	79.7	105.8
A0A1U7ZRD1	heat shock 70 kDa protein 8 OS=Nelumbo nucifera OX=4432 GN=LOC104596515 PE=3 SV=1	33	16	29	16	575	62.5	5.66	64.4	65.6	66.8	67.5	117.8	119.6	119.2	113.2	117.5	114.2	98.6
A0A1U8A8X6	nuclear autoantigenic sperm protein OS=Nelumbo nucifera OX=4432 GN=LOC104601993 PE=4 SV=1	28	11	15	11	477	51.2	4.5	46.74	103.3	105.2	105.3	99	99.1	100.4	93.3	96	99	99.4
A0A1U8B5F5	D-3-phosphoglycerate dehydrogenase OS=Nelumbo nucifera OX=4432 GN=LOC104607170 PE=3 SV=1	17	9	31	2	546	57.6	6.15	93.31	112	111.6	116.8	95.7	102.2	97.1	88.3	86.9	83.9	105.5
A0A1U8B4T7	Proteasome subunit alpha type OS=Nelumbo nucifera OX=4432 GN=LOC104607011 PE=3 SV=1	42	7	23	7	235	25.7	5.17	65.91	104	104.6	106.3	96.5	97.2	100.2	96.6	97	96.9	100.6
A0A1U7Z648	stem-specific protein TSJT1 OS=Nelumbo nucifera OX=4432 GN=LOC104587170 PE=4 SV=1	32	7	23	3	254	28.2	7.11	66.16	68.2	76.6	74.2	104.4	105.6	109.9	120.7	122.1	124.4	93.8
A0A1U8AWH0	late histone H2B.2.2-like OS=Nelumbo nucifera OX=4432 GN=LOC104604599 PE=3 SV=1	64	17	33	17	233	26.1	9.8	67.31	80.4	76.5	77.9	104.4	104.7	103.2	117.8	120.1	119.4	95.7
A0A1U7YU99	1,4-alpha-glucan-branching enzyme 1, chloroplastic/amyloplastic OS=Nelumbo nucifera OX=4432 GN=LOC104587877 PE=4 SV=1	24	20	32	19	829	94.7	6.1	83.1	156.1	154.1	156.1	76.4	74.7	74.4	66.3	67.7	67.3	106.9
A0A1U8QBS9	2-hydroxyacyl-CoA lyase OS=Nelumbo nucifera OX=4432 GN=LOC104613342 PE=3 SV=1	36	16	21	16	584	62.4	6	56.67	88	88.6	89.3	109.4	109.2	108.7	100.2	105	100.9	100.7
A0A1U8ALM5	Tubulin beta chain OS=Nelumbo nucifera OX=4432 GN=LOC104605561 PE=3 SV=1	31	10	25	2	447	50.3	4.81	64.25	108	110.1	112.8	93.5	88.8	107.2	81.3	105.4	95.8	97
A0A1U7ZX27	60S ribosomal protein L12-like OS=Nelumbo nucifera OX=4432 GN=LOC104594855 PE=3 SV=1	60	8	34	3	166	17.9	9.14	86.54	102.4	97.9	103.1	99.9	100.3	100.6	99.5	99.8	98	98.6
A0A1U7YS00	Threonine dehydratase OS=Nelumbo nucifera OX=4432 GN=LOC104587183 PE=3 SV=1	27	12	15	12	610	67.2	6.54	44.42	138.2	135.6	137	83.3	86.1	83.9	76.7	78.8	77.1	103.4
A0A1U7Z1S1	26S protease regulatory subunit 6B homolog OS=Nelumbo nucifera OX=4432 GN=LOC104588370 PE=3 SV=1	45	16	29	14	421	47.3	5.6	69.36	108.8	110.5	106.7	96.3	98.3	100.5	90.9	92.7	92.5	102.8
A0A1U8AI25	Proteasome subunit alpha type OS=Nelumbo nucifera OX=4432 GN=LOC104604242 PE=3 SV=1	43	10	20	1	249	27.3	7.44	65.11	106.6	126.5	70.3	114.4	99.2	106.2	106.6	88.1	84.8	97.4
A0A1U8AQX8	ultraviolet-B receptor UVR8 OS=Nelumbo nucifera OX=4432 GN=LOC104606663 PE=4 SV=1	34	11	21	7	450	48.3	6.18	53.86	86.5	89.6	88.6	105.2	105	106.9	103.7	107.8	107.1	99.6
A0A1U8AWW5	ras-related protein RABB1c OS=Nelumbo nucifera OX=4432 GN=LOC104608288 PE=4 SV=1	56	10	19	2	211	23.1	6.9	45.7	101.6	101.3	101.2	110.2	112.5	101	89.4	86.5	93.5	102.6
A0A1U7Z1E6	bifunctional 3-dehydroquinate dehydratase/shikimate dehydrogenase, chloroplastic isoform X2 OS=Nelumbo nucifera OX=4432 GN=LOC104585665 PE=3 SV=1	36	15	22	13	514	55.9	6.74	55.23	116.7	121.3	118.3	86	88.6	86	94.4	94.8	92.3	101.7
A0A1U7ZCV5	UDP-arabinopyranose mutase 1-like OS=Nelumbo nucifera OX=4432 GN=LOC104591763 PE=4 SV=1	40	13	31	10	369	42.1	6.33	64.84	119.3	118.9	118.1	93.4	92.9	94	90.3	87.9	84.6	100.4
A0A1U7ZNK7	U2 snRNP auxiliary factor large subunit OS=Nelumbo nucifera OX=4432 GN=LOC104595741 PE=3 SV=1	30	10	15	6	559	62.3	7.4	43.47	94	95.3	92.8	102.4	103.1	106.6	106.2	97.3	101.7	100.5
A0A1U7ZLM1	probable Xaa-Pro aminopeptidase P OS=Nelumbo nucifera OX=4432 GN=LOC104595759 PE=3 SV=1	28	15	25	15	657	73.7	5.94	42.47	100	101.4	103.6	102.9	103.9	104.4	96.1	90.8	96.5	100.5
A0A1U7ZVF1	ras-related protein RABB1c-like OS=Nelumbo nucifera OX=4432 GN=LOC104594386 PE=4 SV=1	55	10	20	1	211	23.1	6.9	49.56	95.5	96.8	95.7	105.5	106.2	105.2	100.6	97.7	98.6	98.3
A0A1U8A1Z2	non-classical arabinogalactan protein 31-like OS=Nelumbo nucifera OX=4432 GN=LOC104599402 PE=4 SV=1	30	8	44	8	236	25	9.95	115.17	120.8	119	120.3	92.4	89.1	92.6	87.9	88	87.2	102.7
A0A1U7ZV96	ALG-2 interacting protein X-like OS=Nelumbo nucifera OX=4432 GN=LOC104594335 PE=4 SV=1	22	17	24	17	874	98	6.39	48.42	110	110.3	110.1	96.2	97.5	94.4	93.9	92.8	93.5	101.3
A0A1U8APP2	sucrose-phosphatase 2-like OS=Nelumbo nucifera OX=4432 GN=LOC104605199 PE=4 SV=1	32	12	20	12	423	48	6.62	58.7	106.7	106.9	107.8	98.9	98.4	96.2	93.5	93.9	95.8	101.9
A0A1U7YTU7	WEB family protein At5g55860-like OS=Nelumbo nucifera OX=4432 GN=LOC104585851 PE=4 SV=1	31	20	24	20	662	73.2	5.69	59.05	114.4	115.8	114.7	94.7	90.9	92.2	91.1	92.2	92.8	101.2
A0A1U7YU09	sulfite reductase [ferredoxin], chloroplastic-like OS=Nelumbo nucifera OX=4432 GN=LOC104585910 PE=4 SV=1	29	20	26	14	687	77.4	8.94	63.16	126.8	124.2	123.7	91.2	94.2	91.3	80.8	86.1	81.3	100.4
A0A1U7ZC97	pyrophosphate-energized vacuolar membrane proton pump-like OS=Nelumbo nucifera OX=4432 GN=LOC104588605 PE=3 SV=1	16	12	19	2	765	80.3	5.4	54.03	122.7	121.6	129.5	86.7	83.5	85.8	85.6	88.3	93.4	102.8
A0A1U8BD38	eukaryotic translation initiation factor 4G-like isoform X1 OS=Nelumbo nucifera OX=4432 GN=LOC104609840 PE=4 SV=1	13	22	24	16	1908	206.9	7.08	48	103.8	109.7	106.5	102.3	104.7	103	87.1	86.9	93.6	102.4
A0A1U7ZXD3	protein EMB-1-like OS=Nelumbo nucifera OX=4432 GN=LOC104594933 PE=4 SV=1	52	4	22	3	126	13.9	8.16	74.72	57	58.7	55.4	131.7	127.5	128.6	116.7	115.9	111.4	97.2
A0A1U8AZ82	RNA-binding KH domain-containing protein PEPPER-like OS=Nelumbo nucifera OX=4432 GN=LOC104609054 PE=4 SV=1	31	13	24	8	472	49.9	5.52	54.76	109.5	106.5	110.6	98.6	99.7	100.4	92	90.3	92.5	99.9
A0A1U8APA0	60S ribosomal protein L12 OS=Nelumbo nucifera OX=4432 GN=LOC104602623 PE=3 SV=1	60	8	33	3	166	17.8	9.11	89.74	103.2	104.6	107.7	94.8	100.2	97.8	96.8	100.2	95.5	99.2
A0A1U8AIL8	threonine synthase, chloroplastic-like OS=Nelumbo nucifera OX=4432 GN=LOC104600632 PE=4 SV=1	37	16	24	16	528	58.1	7.99	43.7	114	111.1	109.8	94.7	96.5	95.8	93.2	91	92.6	101.4
A0A1U7ZIU0	Methylenetetrahydrofolate reductase OS=Nelumbo nucifera OX=4432 GN=LOC104593382 PE=3 SV=1	32	17	23	13	594	67.1	6.2	53.79	105	101.8	104.1	99.7	101	100.4	94.9	95.5	96.7	100.9
A0A1U7ZBU9	60S ribosomal protein L32-1-like OS=Nelumbo nucifera OX=4432 GN=LOC104588917 PE=4 SV=1	42	6	29	1	133	15.6	10.7	65.19	96.6	96.5	90.8	102.7	112.7	102.3	97	104.7	100.2	96.5
A0A1U8AW15	Malic enzyme OS=Nelumbo nucifera OX=4432 GN=LOC104604498 PE=3 SV=1	24	14	30	4	643	70.6	7.71	65.24	97.5	109.3	98	95	98.2	90.8	107.1	107.4	95.7	100.9
A0A1U7ZDJ8	Glucose-6-phosphate 1-dehydrogenase OS=Nelumbo nucifera OX=4432 GN=LOC104592969 PE=3 SV=1	35	17	22	8	523	59.8	8.53	51.61	72.4	74.5	75.1	113	111	112.7	117	114.8	113	96.4
A0A1U7ZSC9	uncharacterized protein LOC104593543 OS=Nelumbo nucifera OX=4432 GN=LOC104593543 PE=4 SV=1	15	8	38	3	440	49.6	4.67	110.22	104.5	100.7	104.9	104.4	100.5	102.4	96	95.3	92.3	98.8
A0A1U8AL42	dnaJ protein homolog OS=Nelumbo nucifera OX=4432 GN=LOC104601432 PE=3 SV=1	34	14	25	7	416	46.6	6.48	62.13	110.5	106	112.2	97	96.4	95.8	93.7	94.5	93.9	99.9
A0A1U8B8U4	(RS)-norcoclaurine 6-O-methyltransferase-like OS=Nelumbo nucifera OX=4432 GN=LOC104610908 PE=3 SV=1	38	12	28	8	345	38.1	5.82	64.47	161.2	161.1	163.7	70.1	70.3	69	65.3	67.4	68.5	103.3
A0A1U7ZJW8	4-alpha-glucanotransferase DPE2 isoform X1 OS=Nelumbo nucifera OX=4432 GN=LOC104593644 PE=4 SV=1	20	16	20	16	947	109.9	6.18	42.79	111.3	114.8	112.2	95.2	97.9	95.1	90.3	89.9	91.6	101.6
A0A1U7ZNG2	uncharacterized protein LOC104595702 isoform X2 OS=Nelumbo nucifera OX=4432 GN=LOC104595702 PE=4 SV=1	31	6	13	2	174	19.3	9.33	41.67	103.7	100.8	102.8	107.2	107.8	109.3	88.7	90.6	89.4	99.6
A0A1U8A7Z4	heme-binding-like protein At3g10130, chloroplastic OS=Nelumbo nucifera OX=4432 GN=LOC104601173 PE=4 SV=1	64	11	24	4	205	22.6	8.16	62.29	57.4	55	57.9	125.1	120.9	121.3	122.5	125	119.9	94.9
A0A1U8AXV1	Glucose-6-phosphate isomerase OS=Nelumbo nucifera OX=4432 GN=LOC104608602 PE=3 SV=1	30	17	23	8	636	69.4	5.92	48.05	98.3	99.3	99	103.8	106.4	111.5	96.7	92.9	90.7	101.3
A0A1U7YSY5	DEAD-box ATP-dependent RNA helicase 20 OS=Nelumbo nucifera OX=4432 GN=LOC104586614 PE=3 SV=1	41	17	23	13	512	56.5	8.84	53.1	88.7	91.4	86.8	111.4	111.8	113.7	98.1	97.3	100.2	100.7
A0A1U7ZBG5	26S proteasome non-ATPase regulatory subunit 6 homolog OS=Nelumbo nucifera OX=4432 GN=LOC104592980 PE=4 SV=1	27	10	29	2	386	44.4	5.8	72.09	99.1	98.1	100.1	107.5	111.9	113.7	89.5	90.7	90.1	99.3
A0A1U7ZG33	acetyl-coenzyme A synthetase, chloroplastic/glyoxysomal OS=Nelumbo nucifera OX=4432 GN=LOC104592674 PE=3 SV=1	23	14	22	6	703	78	5.57	51.12	102.6	98.3	103.1	94.3	101	97.8	94	104	101.2	103.7
A0A1U8AV52	ATP-dependent 6-phosphofructokinase OS=Nelumbo nucifera OX=4432 GN=LOC104604460 PE=3 SV=1	29	13	20	6	490	54	7.72	54.43	98	99.7	99.8	94.2	97.9	96.4	104.4	105.4	105	99.2
A0A1U8AWU2	uncharacterized protein LOC104608274 OS=Nelumbo nucifera OX=4432 GN=LOC104608274 PE=4 SV=1	43	14	29	14	433	46.3	8.09	60.24	92.8	92.8	93.6	102.8	105.1	98.3	104.3	105.6	105.9	98.8
A0A1U8AL01	translocase of chloroplast 120, chloroplastic-like OS=Nelumbo nucifera OX=4432 GN=LOC104601599 PE=4 SV=1	16	17	21	8	1190	131.1	4.82	49.08	112.1	115.9	111.7	91.7	91.8	95.4	91.9	88.9	97.8	102.7
A0A1U8A842	UDP-glucose 6-dehydrogenase OS=Nelumbo nucifera OX=4432 GN=LOC104597982 PE=3 SV=1	34	13	20	2	480	52.8	7.8	55.63	173.5	180.5	171.8	59.6	65.3	71.3	55.7	58.4	59.2	104.7
A0A1U8A7G9	26S proteasome non-ATPase regulatory subunit 12 homolog A-like OS=Nelumbo nucifera OX=4432 GN=LOC104599946 PE=4 SV=1	30	13	20	8	441	50.5	7.46	49.8	103	103.5	101.8	102.8	99.8	103.6	96.3	95.4	93.6	100.2
A0A1U7ZK10	eukaryotic translation initiation factor 4B2 OS=Nelumbo nucifera OX=4432 GN=LOC104591519 PE=4 SV=1	41	21	26	13	535	58.8	8.16	48.73	103.7	102.6	102.2	99.3	97.3	98.4	101	97.2	99.4	99
A0A1U7ZFC0	DEAD-box ATP-dependent RNA helicase 56-like OS=Nelumbo nucifera OX=4432 GN=LOC104592428 PE=4 SV=1	32	14	33	1	428	48.3	5.64	75.2	120.3	116.4	120.4	99.5	91.4	92.1	85.5	83.4	83.9	107
D2K271	Chloroplast ascorbate peroxidase OS=Nelumbo nucifera OX=4432 GN=LOC104587545 PE=2 SV=1	38	13	26	13	347	37.9	8.51	61.88	103.9	104.3	104.6	103.6	104	104.5	90.2	92.9	93	99.1
A0A1U8AIZ1	protein transport protein SEC13 homolog B-like OS=Nelumbo nucifera OX=4432 GN=LOC104604510 PE=3 SV=1	43	10	20	6	301	32.6	6.21	53.75	110.7	106.8	105.8	93.3	96	98.6	95.6	101	92.6	99.5
A0A1U8B1I4	Proteasome subunit alpha type OS=Nelumbo nucifera OX=4432 GN=LOC104609863 PE=3 SV=1	50	11	18	4	246	27.3	6.32	55.33	104	107.6	105.5	101.4	97	97.6	96	96.5	95	99.4
A0A1U8ACV7	Isocitrate dehydrogenase [NAD] subunit, mitochondrial OS=Nelumbo nucifera OX=4432 GN=LOC104599244 PE=3 SV=1	35	13	24	8	379	41.5	7.24	63.99	96.5	95.5	95.1	100.8	101.6	100.6	105.9	102.4	102.6	99.1
A0A1U8AN47	Annexin OS=Nelumbo nucifera OX=4432 GN=LOC104605972 PE=3 SV=1	44	15	26	14	317	36.4	6.14	60.64	96.3	97.7	96.5	97.6	97.2	101.8	106.3	105	102.3	99.2
A0A1U8AQE0	60S ribosomal protein L23 OS=Nelumbo nucifera OX=4432 GN=LOC104602786 PE=3 SV=1	68	8	36	8	140	15	10.39	88.73	104.3	103.9	106.6	98	95.9	96	98.6	96.7	98.3	101.7
A0A1U8AV79	Phosphotransferase OS=Nelumbo nucifera OX=4432 GN=LOC104604479 PE=3 SV=1	25	11	20	8	500	54.3	6.05	43.64	103.1	106.3	102.8	97.6	103.4	102.2	88.3	93.7	93.7	108.8
A0A1U8A9K9	phenylalanine--tRNA ligase beta subunit, cytoplasmic-like OS=Nelumbo nucifera OX=4432 GN=LOC104600545 PE=4 SV=1	34	17	22	12	593	66.8	5.63	46.11	101.9	102.9	103.2	99.6	97.5	98.7	96.9	101.1	95.9	102.3
A0A1U7Z8V4	Urease OS=Nelumbo nucifera OX=4432 GN=LOC104591664 PE=3 SV=1	17	12	20	12	837	89.9	5.86	46.4	74.5	73.6	72.5	114.1	116.8	116.1	109.3	110.3	110.9	102
A0A1U8BFW8	ATP synthase subunit O, mitochondrial-like OS=Nelumbo nucifera OX=4432 GN=LOC104613014 PE=3 SV=1	48	12	26	6	243	26.9	9.44	70.07	92	92.4	93.4	105.2	102	103.6	107.1	105	101.6	97.8
A0A1U8ASS5	acyl-CoA-binding domain-containing protein 4-like isoform X1 OS=Nelumbo nucifera OX=4432 GN=LOC104606108 PE=4 SV=1	26	16	21	16	675	73.5	5.24	46.31	130.8	133.2	128.3	86.2	87.7	87.4	79.3	81.5	82.2	103.5
A0A1U7ZJX1	60S ribosomal protein L27a-3-like OS=Nelumbo nucifera OX=4432 GN=LOC104591484 PE=3 SV=1	48	7	32	3	146	16.3	10.49	86.91	100.3	101.2	105	95.9	92.1	96.7	106	100.1	102.1	100.5
A0A1U7ZU07	phosphoglucomutase, chloroplastic-like isoform X1 OS=Nelumbo nucifera OX=4432 GN=LOC104596231 PE=4 SV=1	22	12	23	7	633	68.5	6.15	58	107.3	104.4	104	94.2	96.3	94	97.1	99.3	101.3	102
A0A1U8AME8	diaminopimelate decarboxylase 2, chloroplastic-like OS=Nelumbo nucifera OX=4432 GN=LOC104601807 PE=3 SV=1	27	11	20	7	482	53.5	7.88	52.87	117.3	114.6	117	93.5	95.2	93	92.1	90	87.5	99.8
A0A1U8ADP7	guanylate-binding protein 2-like OS=Nelumbo nucifera OX=4432 GN=LOC104599480 PE=4 SV=1	15	18	20	9	1070	120.4	7.14	47.77	105.5	105.1	112.8	88.1	93.3	92.8	99.8	98.3	104.2	100.2
A0A1U7YXE0	Cysteine synthase OS=Nelumbo nucifera OX=4432 GN=LOC104586991 PE=3 SV=1	39	10	22	9	385	41	8.37	52.36	103.4	109.2	107.7	96.3	97.9	99.6	94.9	99.3	93.4	98.4
A0A1U8BFC7	protein TPR2-like isoform X1 OS=Nelumbo nucifera OX=4432 GN=LOC104612849 PE=4 SV=1	17	17	21	1	1134	125.1	7.18	49.48	106.8	95.3	92.8	94.9	103.1	89.6	106.1	102.6	101.9	106.9
A0A1U8Q6G0	glutathione S-transferase-like OS=Nelumbo nucifera OX=4432 GN=LOC109113889 PE=3 SV=1	43	9	30	9	223	25.3	8.37	77.18	78.8	80	80.1	109.7	112.4	111.1	111.5	110.2	109.3	97.1
A0A1U8AHY8	40S ribosomal protein SA OS=Nelumbo nucifera OX=4432 GN=LOC104600469 PE=3 SV=1	47	12	39	2	305	33.4	5.08	108.31	101	115.9	102.7	92	90.3	96.7	89	90.9	108.5	113.1
A0A1U7YWV1	Sulfurtransferase OS=Nelumbo nucifera OX=4432 GN=LOC104587862 PE=4 SV=1	42	12	25	12	375	41	7.24	56.79	104.9	106.2	98.4	100.7	104.4	97.5	94	94.7	99.1	100.2
A0A1U8AWM0	Eukaryotic translation initiation factor 3 subunit D OS=Nelumbo nucifera OX=4432 GN=LOC104608212 PE=3 SV=1	33	12	16	2	565	64.3	5.29	41.8	110.6	123.5	103.2	83.8	98.3	96	88.3	97.7	103.3	95.2
A0A1U8A1A1	osmotin-like protein OS=Nelumbo nucifera OX=4432 GN=LOC104599206 PE=4 SV=1	37	9	45	9	264	28.2	8.06	135.57	103.2	101.4	103.3	91.2	92.5	91.3	105.6	106.2	103.8	101.7
A0A1U7Z937	60S ribosomal protein L32-1-like OS=Nelumbo nucifera OX=4432 GN=LOC104590546 PE=4 SV=1	42	6	29	1	133	15.6	10.54	64.06	102	103.5	98.5	97.8	99.8	101.7	97.2	99	98.8	101.6
A0A1U7Z9X8	acetyl-coenzyme A synthetase, chloroplastic/glyoxysomal-like isoform X1 OS=Nelumbo nucifera OX=4432 GN=LOC104591930 PE=3 SV=1	23	16	26	8	753	83.5	6.49	54.88	109	111	108	93.3	102.3	98.2	90.7	89.7	92.1	105.6
A0A1U8B1V8	dynamin-related protein 1E-like OS=Nelumbo nucifera OX=4432 GN=LOC104606429 PE=3 SV=1	29	16	22	6	613	68.8	7.65	47.67	112.1	112.1	109.5	96.8	95.7	96.6	92.8	87.4	94.8	102.1
A0A1U8AKE7	dnaJ protein homolog OS=Nelumbo nucifera OX=4432 GN=LOC104601430 PE=3 SV=1	32	13	26	4	417	46.6	6.48	60.16	129.3	126.7	130.1	87.2	88.2	88.2	79.8	82	83.9	104.7
A0A1U7ZEF2	ubiquitin-40S ribosomal protein S27a-like OS=Nelumbo nucifera OX=4432 GN=LOC104593164 PE=4 SV=1	49	8	157	2	156	17.8	9.77	316.07	97.2	99.7	96.1	100.5	102.1	101.2	99.1	100.8	102.5	100.7
S4WGX1	Protein TIC 214 OS=Nelumbo nucifera OX=4432 GN=ycf1 PE=3 SV=1	14	17	24	17	1520	181.9	9.5	50.95	99.2	98.6	98.8	104.9	101.5	105	100.8	96.1	98.9	96.3
A0A1U8ASK8	protein DJ-1 homolog D OS=Nelumbo nucifera OX=4432 GN=LOC104607008 PE=4 SV=1	29	9	20	9	392	42.1	5.85	61.48	80.9	81	79.3	109.9	110	111.4	110.4	109.5	110.8	96.9
A0A1U8B6R5	DNA damage-binding protein 1-like OS=Nelumbo nucifera OX=4432 GN=LOC104607867 PE=4 SV=1	14	16	28	1	1089	121.3	5.41	62.72	115.9	121.7	114.9	90.6	94.6	90.4	90.9	93.1	86.3	101.6
A0A1U7ZL00	uncharacterized protein LOC104591764 OS=Nelumbo nucifera OX=4432 GN=LOC104591764 PE=4 SV=1	48	9	18	9	266	30	7.36	44.55	66.4	65.4	66	118.4	118.7	120.3	114.6	117.6	112.8	99.8
A0A1U8BDE9	60S ribosomal protein L13a-4-like OS=Nelumbo nucifera OX=4432 GN=LOC104613370 PE=3 SV=1	50	12	44	3	206	23.5	10.48	121.74	103.2	106.2	106.1	93.4	96.6	94.7	102.6	95.6	99.9	101.7
A0A1U8AQW6	triosephosphate isomerase, chloroplastic-like OS=Nelumbo nucifera OX=4432 GN=LOC104605564 PE=3 SV=1	39	12	22	4	315	34.1	6.86	56.16	123.2	125	120.7	86.8	88.5	86.4	85.4	93.7	85.7	104.7
A0A1U8B452	30S ribosomal protein S1, chloroplastic OS=Nelumbo nucifera OX=4432 GN=LOC104607070 PE=4 SV=1	31	12	17	12	408	44.7	5.47	44.98	103	101.4	101.9	99.2	99.8	100.7	96.3	100.4	97.9	99.3
A0A1U8AJU0	uncharacterized protein At5g02240-like OS=Nelumbo nucifera OX=4432 GN=LOC104601047 PE=4 SV=1	47	11	20	11	310	33.9	9.09	39.66	108.5	103.7	105.1	99.1	100.1	98	93.2	93.6	97.9	100.9
A0A1U8Q5B6	Polyadenylate-binding protein OS=Nelumbo nucifera OX=4432 GN=LOC104600166 PE=3 SV=1	29	17	20	16	647	71.1	8.68	42.51	114.2	114.4	113.8	94.8	97.5	100.6	88.9	90.7	85.3	99.7
A0A1U7YY94	phenylalanine--tRNA ligase alpha subunit, cytoplasmic OS=Nelumbo nucifera OX=4432 GN=LOC104587241 PE=4 SV=1	26	14	23	14	488	56	8.51	54.41	105.1	103	107.5	98.6	97.9	96.9	100.3	96.2	95.7	98.8
A0A1U7Z8G8	protein disulfide isomerase-like 1-6 OS=Nelumbo nucifera OX=4432 GN=LOC104592184 PE=4 SV=1	31	15	23	15	541	60.8	5.15	54.29	106	107.4	109.2	95.2	101	99.3	93	93.9	93.6	101.6
A0A1U7Z4D4	60S ribosomal protein L22-2-like OS=Nelumbo nucifera OX=4432 GN=LOC104586603 PE=4 SV=1	56	7	29	2	124	14.3	9.57	82.38	100.9	102.9	105.7	102.2	98.6	100.3	96.3	99.7	93.5	99.9
A0A1U7ZNB7	probable calcium-binding protein CML13 OS=Nelumbo nucifera OX=4432 GN=LOC104596240 PE=4 SV=1	84	12	19	6	147	16.7	4.96	51.48	126.2	122.8	130.1	88.3	87.2	87.1	83.4	87.3	84	103.7
A0A1U8Q8P5	isoamylase 3, chloroplastic isoform X1 OS=Nelumbo nucifera OX=4432 GN=LOC104604263 PE=4 SV=1	23	12	20	12	782	88.6	6.67	43.62	94.9	97.7	93.5	100.4	105.2	110.9	98.2	101.4	100.3	97.6
A0A1U8B464	probable mediator of RNA polymerase II transcription subunit 36b OS=Nelumbo nucifera OX=4432 GN=LOC104610635 PE=3 SV=1	42	11	24	3	303	32.1	10.33	61.75	100	100	104.5	98.4	102.8	99.1	100.5	94.6	100.9	99.3
A0A1U7Z8M9	26S proteasome non-ATPase regulatory subunit 6 homolog OS=Nelumbo nucifera OX=4432 GN=LOC104591614 PE=4 SV=1	27	9	28	1	386	44.5	5.92	70.26	100.4	99.1	109.3	86.2	111.9	100.3	90.8	87.1	104.9	110
A0A1U8B8D1	ABC transporter E family member 2 OS=Nelumbo nucifera OX=4432 GN=LOC104608080 PE=4 SV=1	22	13	22	2	605	68.3	7.81	47.33	103.7	105.2	103.9	98.2	99.6	102.7	95.8	92.3	95.3	103.3
A0A1U7ZYH8	stress-related protein-like OS=Nelumbo nucifera OX=4432 GN=LOC104598973 PE=4 SV=1	47	9	24	8	243	27	6.89	66.81	184.5	175.1	180.1	63.9	62	61.3	54.1	56.3	55.4	107.2
A0A1U8BA28	L-galactono-1,4-lactone dehydrogenase, mitochondrial OS=Nelumbo nucifera OX=4432 GN=LOC104608844 PE=4 SV=1	25	16	21	16	612	69.8	7.72	47.45	95.7	98.3	97.1	103.9	107	105.4	99.2	95.3	99.2	98.8
A0A1U7ZWR1	ATP synthase subunit d, mitochondrial OS=Nelumbo nucifera OX=4432 GN=LOC104594771 PE=3 SV=1	61	10	28	3	168	19.6	5.29	74.25	102.7	107.2	100.1	90.8	88.6	95.3	107.9	102.6	100.1	104.7
A0A1U7ZWG2	farnesyl pyrophosphate synthase 1-like OS=Nelumbo nucifera OX=4432 GN=LOC104594300 PE=3 SV=1	31	10	23	6	349	40.5	5.76	54.63	127.4	124.2	129.5	90.3	85.7	83.9	85.8	85.1	86.3	101.7
A0A1U8AA60	isoflavone reductase-like protein OS=Nelumbo nucifera OX=4432 GN=LOC104601836 PE=4 SV=1	35	12	26	12	308	33.9	6.74	61.79	126.9	125.5	124.8	86.7	86.1	84.1	90.7	86.5	87.9	100.7
A0A1U8ASJ1	Beta-adaptin-like protein OS=Nelumbo nucifera OX=4432 GN=LOC104603666 PE=3 SV=1	18	15	23	1	900	99.7	5.16	48.48	118.7	121.6	118.5	84.8	88.1	93.5	98.4	90.9	89.5	96
A0A1U8AP43	60S ribosomal protein L13 OS=Nelumbo nucifera OX=4432 GN=LOC104606030 PE=3 SV=1	44	11	29	3	207	23.7	10.76	73.51	103.2	102	105.8	96.4	95.1	92.3	104.8	101	99.1	100.4
A0A1U7ZNL6	myosin-11 OS=Nelumbo nucifera OX=4432 GN=LOC104594672 PE=4 SV=1	27	17	18	17	680	76.8	5.11	49.93	139.8	134.7	135.9	82.7	82.5	84.3	79.3	80.5	74.6	105.6
A0A1U8AI87	60S ribosomal protein L22-2-like OS=Nelumbo nucifera OX=4432 GN=LOC104600743 PE=4 SV=1	56	7	26	2	124	14.2	9.57	67.97	104.2	102.7	109.9	103.9	92.5	97.6	94.9	86	110	98.2
A0A1U7YUS3	aspartate carbamoyltransferase 1, chloroplastic-like OS=Nelumbo nucifera OX=4432 GN=LOC104588044 PE=3 SV=1	34	14	25	6	405	45.1	7.39	58.09	97.6	99.6	100.3	101.3	100.5	101.1	101.3	96.8	100.9	100.8
A0A1U8AUT3	(RS)-norcoclaurine 6-O-methyltransferase-like OS=Nelumbo nucifera OX=4432 GN=LOC104607696 PE=2 SV=1	38	11	23	8	351	39.2	5.87	60.22	211.5	202.6	210.6	44.2	46.3	43.9	46.4	44.4	44.7	105.3
A0A1U7Z3Z5	probable nucleolar protein 5-2 isoform X1 OS=Nelumbo nucifera OX=4432 GN=LOC104586063 PE=4 SV=1	24	10	16	4	584	64.7	9.13	49.99	119.1	117.4	116.2	93.5	89	89.4	91.9	95.3	87.3	100.9
A0A1U8AFW7	eukaryotic translation initiation factor 2 subunit alpha homolog OS=Nelumbo nucifera OX=4432 GN=LOC104602529 PE=4 SV=1	36	15	30	5	344	39	5.48	64.65	101.9	103.5	102.2	100.8	98.4	101.4	96.4	95.8	98.8	100.9
A0A1U7ZS37	eukaryotic translation initiation factor 2 subunit alpha homolog OS=Nelumbo nucifera OX=4432 GN=LOC104597292 PE=4 SV=1	36	14	28	4	344	38.9	5.4	60.26	114.2	109.7	107.4	92.2	98.6	85.1	99.8	104.1	89.2	99.8
A0A1U8A6P7	probable fructokinase-6, chloroplastic OS=Nelumbo nucifera OX=4432 GN=LOC104600730 PE=3 SV=1	34	12	21	10	390	41.8	5.94	52.03	88.3	88.3	90.5	107.3	105.2	105.1	107.4	107.6	103.3	96.9
A0A1U8BBF3	pre-mRNA-processing protein 40A OS=Nelumbo nucifera OX=4432 GN=LOC104609033 PE=4 SV=1	19	21	28	21	1046	118.2	7.47	53.14	101.4	98.8	98.8	100.9	100.5	102.4	98.7	97	99.8	101.6
A0A1U7ZAT1	uncharacterized protein LOC104588174 isoform X3 OS=Nelumbo nucifera OX=4432 GN=LOC104588174 PE=4 SV=1	25	12	22	1	652	73	5.08	48.3	78.3	77.7	74.2	104.3	110.6	112.7	112.5	114.2	113.3	102.3
A0A1U8AS33	Thioredoxin reductase OS=Nelumbo nucifera OX=4432 GN=LOC104606866 PE=3 SV=1	40	11	17	5	333	35.7	5.95	44.32	112.2	114.5	112.5	95.6	96.4	97.6	95.5	91.2	84.9	99.5
A0A1U8AE52	ras-related protein RABE1c-like OS=Nelumbo nucifera OX=4432 GN=LOC104599292 PE=4 SV=1	49	10	23	8	216	24	8.24	68.35	114.5	112.3	114.4	94.1	92.5	92.7	93	92.1	93.4	100.8
A0A1U7YUK0	(RS)-norcoclaurine 6-O-methyltransferase-like OS=Nelumbo nucifera OX=4432 GN=LOC104587969 PE=2 SV=1	42	11	27	7	346	38.4	6.52	69.23	175.5	167.8	176.4	62.2	61.6	64.3	61.7	64.8	61.8	103.9
A0A1U8BF16	Eukaryotic translation initiation factor 3 subunit I OS=Nelumbo nucifera OX=4432 GN=LOC104610193 PE=3 SV=1	42	11	25	4	326	36.1	7.64	60.03	107.4	105.7	107	99	95.9	97.5	94.1	95.6	96.9	101
A0A1U7Z6P4	malate dehydrogenase [NADP], chloroplastic-like OS=Nelumbo nucifera OX=4432 GN=LOC104587331 PE=4 SV=1	29	13	24	7	437	47.8	7.24	68.08	90.1	91.1	90.3	105.5	105	104.8	105.8	107	101.4	98.9
A0A1U8AC18	nodal modulator 1 OS=Nelumbo nucifera OX=4432 GN=LOC104598759 PE=4 SV=1	15	17	23	17	1198	131.4	6.39	56.04	110.8	109.7	107.3	97.5	98.8	98.8	91.2	93.5	91.2	101.2
A0A1U8Q6Z2	probable 26S proteasome non-ATPase regulatory subunit 3 OS=Nelumbo nucifera OX=4432 GN=LOC104603655 PE=4 SV=1	42	18	21	6	488	55.8	9.13	46.44	113.9	107.3	106.8	95.8	100.7	101.7	88.3	88.1	91.7	105.6
A0A1U8BP90	Inosine-5'-monophosphate dehydrogenase OS=Nelumbo nucifera OX=4432 GN=LOC104613005 PE=3 SV=1	38	12	19	12	501	53.3	6.57	44.78	119.9	118.6	121.1	89.8	89.1	87.7	90.8	90.8	90.3	101.9
A0A1U8A9W2	6-phosphogluconate dehydrogenase, decarboxylating OS=Nelumbo nucifera OX=4432 GN=LOC104600620 PE=3 SV=1	30	13	21	4	495	54.2	6.67	54.53	121.3	111.2	118.7	92.9	92.1	86.7	92.6	94.4	89.8	100.4
A0A1U8AAX9	Acyl-coenzyme A oxidase OS=Nelumbo nucifera OX=4432 GN=LOC104598456 PE=3 SV=1	27	16	21	16	664	74.5	7.27	49.03	123.5	121.8	121.8	90.4	93.5	94.7	78.8	85.3	82.5	107.7
A0A1U8ATD8	calmodulin-like OS=Nelumbo nucifera OX=4432 GN=LOC104607238 PE=4 SV=1	44	8	36	1	149	16.9	4.27	99.82	122.1	116	124.5	97	87.1	89.3	83.3	87.6	86.1	107
A0A1U7ZE59	Elongation factor Ts, mitochondrial OS=Nelumbo nucifera OX=4432 GN=LOC104592125 PE=3 SV=1	20	17	21	17	1053	114.8	4.92	42.31	122.3	119.7	122	91.2	91.1	89.8	88.7	85.9	86	103.3
A0A1U7ZLK4	65-kDa microtubule-associated protein 1 OS=Nelumbo nucifera OX=4432 GN=LOC104594142 PE=4 SV=1	25	15	22	8	585	65.6	5.19	44.52	167.4	167.6	166.2	76.8	77.7	78.6	52.3	51.8	54	107.6
A0A1U7YWB3	calmodulin-like OS=Nelumbo nucifera OX=4432 GN=LOC104587650 PE=4 SV=1	44	8	33	1	149	17	4.27	93.75	134.4	127.3	135.6	86.2	86.4	84.2	84.3	83	79.6	99.2
A0A1U8AMV4	formin-like OS=Nelumbo nucifera OX=4432 GN=LOC104605908 PE=4 SV=1	32	16	19	12	649	71.1	4.84	38.03	109.3	108.6	104.3	97.3	97.3	93.7	94.4	98.3	94.4	102.4
A0A1U8BA05	ureidoglycolate hydrolase OS=Nelumbo nucifera OX=4432 GN=LOC104612407 PE=4 SV=1	31	11	18	10	470	51.2	5.94	46.3	111.4	110.9	110.6	95.1	93.6	97	93.7	94	91.8	101.9
A0A1U8A8K2	Succinate dehydrogenase [ubiquinone] flavoprotein subunit, mitochondrial OS=Nelumbo nucifera OX=4432 GN=LOC104601877 PE=3 SV=1	23	15	25	4	637	69.9	6.96	61.46	106.4	102.6	94.4	92	101.1	95.2	99.1	100.9	104.9	103.4
A0A1U7ZFR3	plastid-lipid-associated protein, chloroplastic-like OS=Nelumbo nucifera OX=4432 GN=LOC104594110 PE=4 SV=1	40	9	16	9	332	36	5.25	35.87	80.3	84	81	109.3	107.6	115.2	109	103.6	111.4	98.7
A0A1U7ZJ84	ras-related protein RIC2 OS=Nelumbo nucifera OX=4432 GN=LOC104591257 PE=4 SV=1	52	13	23	5	218	24.2	5.73	55.76	112.5	111.4	116.6	99.1	97.1	97.3	90.4	94.1	83.4	98.1
A0A1U8APT9	Phospho-2-dehydro-3-deoxyheptonate aldolase OS=Nelumbo nucifera OX=4432 GN=LOC104606377 PE=3 SV=1	32	15	22	11	518	57.4	7.96	50.77	182.1	179	184.2	61.6	63	61.1	52.6	53.9	53.8	108.6
A0A1U7ZYV1	activator of 90 kDa heat shock protein ATPase homolog 1-like OS=Nelumbo nucifera OX=4432 GN=LOC104597584 PE=4 SV=1	56	17	23	10	347	38.6	7.27	44.45	112.1	106.9	110.3	96.4	98.1	100.1	91.9	93.2	90.1	100.9
A0A1U7ZJJ1	Proteasome subunit beta OS=Nelumbo nucifera OX=4432 GN=LOC104593563 PE=3 SV=1	31	8	23	2	272	29.2	6.92	52.48	100.2	104.3	101.4	94.8	99	100.5	96.3	104.5	99	100
A0A1U7ZDY2	40S ribosomal protein S11-like OS=Nelumbo nucifera OX=4432 GN=LOC104589116 PE=3 SV=1	46	10	23	1	160	17.8	10.64	63.89	104.6	100.3	104.3	93.6	91.4	92.8	107.6	105.2	102.8	97.5
A0A1U8A5E1	Histone H2B OS=Nelumbo nucifera OX=4432 GN=LOC104599313 PE=3 SV=1	65	13	38	4	158	17.3	9.99	76.18	106.1	104.2	103.9	94.2	94	96	102	100.8	100.2	98.6
A0A1U7YWH9	Protein-lysine N-methyltransferase LOC104587746 OS=Nelumbo nucifera OX=4432 GN=LOC104587746 PE=3 SV=1	43	12	17	8	341	37.6	4.69	40.34	101.9	106.4	104.2	98.2	97	99.4	95.4	97.9	96.1	103.5
A0A1U8API3	uncharacterized protein LOC104602515 OS=Nelumbo nucifera OX=4432 GN=LOC104602515 PE=4 SV=1	32	11	16	11	404	42.9	7.97	41.05	105.5	105	102.1	101	102.6	98.4	91.3	90.4	98.7	105.1
A0A1U8AZN1	60S ribosomal protein L5-like OS=Nelumbo nucifera OX=4432 GN=LOC104609191 PE=3 SV=1	38	11	25	4	302	34.8	9.09	74.23	107.5	109.9	108.3	93.3	91.5	92.7	95.4	100.2	98.8	102.3
A0A1U8AVL0	ras-related protein RABC2a-like OS=Nelumbo nucifera OX=4432 GN=LOC104604565 PE=4 SV=1	56	10	20	7	211	23.4	5.53	53.56	100.8	104.8	101.8	100.9	102.1	98.6	95	99.6	94.5	101.9
A0A1U7ZST4	60S acidic ribosomal protein P0 OS=Nelumbo nucifera OX=4432 GN=LOC104596963 PE=3 SV=1	23	7	25	4	319	34.2	5.47	61.54	88	90.9	86.3	106.3	108.7	103.2	102.7	109.6	107.8	96.5
A0A1U7ZVE1	mitochondrial dicarboxylate/tricarboxylate transporter DTC OS=Nelumbo nucifera OX=4432 GN=LOC104597660 PE=3 SV=1	34	8	15	8	297	31.6	9.52	46.02	95.6	92.6	94.9	101.5	102	100.7	101.7	106.5	106.3	98
A0A1U7Z9C7	Pyruvate dehydrogenase E1 component subunit beta OS=Nelumbo nucifera OX=4432 GN=LOC104591799 PE=4 SV=1	28	7	18	3	376	40.4	5.81	47.05	88.9	85.6	89.1	99.5	103.7	108.3	113.6	109.2	108.9	93.2
A0A1U8B1S5	dynamin-related protein 1E-like OS=Nelumbo nucifera OX=4432 GN=LOC104609889 PE=3 SV=1	29	15	20	5	613	68.7	7.62	42.09	115.4	116.9	106.4	93.4	101	96.7	92.7	90.8	86.2	100.5
A0A1U8AGL3	40S ribosomal protein S11 OS=Nelumbo nucifera OX=4432 GN=LOC104604210 PE=3 SV=1	47	10	23	1	160	17.8	10.42	63.95	114.9	122.2	106.4	97.4	85.8	84.1	89.3	89.9	109.1	100.8
A0A1U8BA12	S-adenosylmethionine synthase OS=Nelumbo nucifera OX=4432 GN=LOC104611256 PE=3 SV=1	31	9	20	2	393	43	5.91	52.62	183.2	170.9	180.1	63.7	64.2	68.8	51	50.4	55.2	112.5
A0A1U7YWI0	60S ribosomal protein L23A OS=Nelumbo nucifera OX=4432 GN=LOC104586697 PE=3 SV=1	38	9	38	9	156	17.5	10.32	85.63	99.9	98.8	97.6	99.5	98.3	98.1	103.5	105.5	101.1	97.8
A0A1U8ASY0	ubiquitin-40S ribosomal protein S27a-like OS=Nelumbo nucifera OX=4432 GN=LOC104607105 PE=4 SV=1	49	8	157	2	156	17.7	9.79	309.46	101.5	102.7	101.8	97.9	92.7	97.8	105.5	96.5	97.9	105.8
A0A1U7ZVN7	calreticulin-3-like OS=Nelumbo nucifera OX=4432 GN=LOC104598256 PE=3 SV=1	30	13	19	3	431	50.7	5.69	48.61	102.3	107.7	102.2	101.7	101.8	96.6	97.7	94.5	96	99.6
A0A1U7YX92	Cysteine proteinase inhibitor OS=Nelumbo nucifera OX=4432 GN=LOC104588774 PE=3 SV=1	59	13	28	9	204	22.8	5.45	66.15	53.7	54.1	53.7	119.4	119.8	118.6	130	128.6	126.3	95.9
A0A1U7ZA21	Proteasome subunit beta OS=Nelumbo nucifera OX=4432 GN=LOC104587914 PE=3 SV=1	46	11	18	2	233	25.1	5.21	50.79	105.5	100	102	102	98.6	99.7	97.5	96.5	98.8	99.5
A0A1U8B4C1	ATP-citrate synthase alpha chain protein 2 OS=Nelumbo nucifera OX=4432 GN=LOC104607114 PE=4 SV=1	31	10	21	6	423	46.6	5.82	42.25	110.4	115.3	110.7	94.3	93.3	94.4	95.1	93.9	91.4	101.3
A0A1U7Z050	flavanone 3-dioxygenase-like OS=Nelumbo nucifera OX=4432 GN=LOC104587834 PE=3 SV=1	44	16	28	16	374	42.8	5.76	51.36	174.3	167.8	173.7	66.7	64	66.3	61.5	60.6	59.1	105.9
A0A1U7Z5Z6	26S proteasome non-ATPase regulatory subunit 12 homolog A OS=Nelumbo nucifera OX=4432 GN=LOC104589607 PE=4 SV=1	29	12	19	7	442	50.6	8.4	43.72	110.2	107.7	108.9	94.7	99.8	97.3	96.2	92.2	95.3	97.6
A0A1U8AEQ1	prohibitin-3, mitochondrial-like OS=Nelumbo nucifera OX=4432 GN=LOC104603193 PE=4 SV=1	38	9	22	1	283	31	8.38	66.56	84.7	84.1	89.5	106.5	95.5	103.5	111.2	112.4	107.4	105.2
A0A1U7Z3N1	phenylalanine--tRNA ligase beta subunit, cytoplasmic-like isoform X1 OS=Nelumbo nucifera OX=4432 GN=LOC104589973 PE=4 SV=1	24	12	18	7	592	66.5	5.55	36.24	107.4	103.2	107.5	96.1	98.9	97.8	102.4	95.1	94.2	97.4
A0A1U8APS3	cytochrome c1-2, heme protein, mitochondrial-like isoform X1 OS=Nelumbo nucifera OX=4432 GN=LOC104606212 PE=4 SV=1	24	7	21	7	390	43.1	9.36	51.88	93.8	95.4	97.8	100.5	103.9	102.6	107.3	104.5	96.7	97.5
A0A1U7YY44	uncharacterized protein LOC104588300 OS=Nelumbo nucifera OX=4432 GN=LOC104588300 PE=4 SV=1	32	6	18	6	283	30.5	7.99	53.54	106.5	105.6	104.7	99	98.4	97.9	97.5	94.8	93.2	102.4
A0A1U7ZSR2	SNF1-related protein kinase regulatory subunit gamma-1-like isoform X1 OS=Nelumbo nucifera OX=4432 GN=LOC104596951 PE=4 SV=1	22	8	19	6	444	47.9	5.43	57.02	97.6	93.8	99.2	106.7	108	106.3	92.9	101	96.2	98.5
A0A1U7Z424	ADP,ATP carrier protein 1, mitochondrial-like OS=Nelumbo nucifera OX=4432 GN=LOC104590098 PE=3 SV=1	23	9	33	1	395	42.9	9.72	84.6	109.9	108.9	107.5	102.6	99.7	97.6	91.1	93.8	88.7	100.1
A0A1U7ZAF4	GEM-like protein 1 OS=Nelumbo nucifera OX=4432 GN=LOC104592099 PE=4 SV=1	43	9	35	9	301	33.4	7.33	78.3	64	66.3	60.6	120	116.7	124.1	117.1	114.8	117.1	99.1
A0A1U8AX31	PP2A regulatory subunit TAP46 OS=Nelumbo nucifera OX=4432 GN=LOC104604766 PE=4 SV=1	32	13	19	13	411	46.4	5.41	38.19	103.5	103.1	99.6	98.7	98.7	98.6	100.4	101.9	96	99.4
A0A1U8ACR3	5-oxoprolinase OS=Nelumbo nucifera OX=4432 GN=LOC104599210 PE=4 SV=1	17	17	21	17	1272	138.3	6.27	36.98	113.1	112.5	112.6	95.2	101.4	100	86.1	86.8	88.5	103.9
A0A1U8B6E0	pentatricopeptide repeat-containing protein At1g80270, mitochondrial-like OS=Nelumbo nucifera OX=4432 GN=LOC104607783 PE=4 SV=1	30	19	24	17	624	70.6	5.99	43.12	103	101.2	103.3	99.9	99.1	99.3	100.5	93.8	101.9	98
A0A1U7YWN1	5-methyltetrahydropteroyltriglutamate-- homocysteine methyltransferase 2-like OS=Nelumbo nucifera OX=4432 GN=LOC104586745 PE=3 SV=1	16	12	31	8	805	89.5	7.46	78.25	105	107.3	108	96.2	95.4	99	95.4	96.1	96.4	101.2
A0A1U8B2Z9	ABC transporter E family member 2-like OS=Nelumbo nucifera OX=4432 GN=LOC104610296 PE=4 SV=1	21	12	21	1	605	68.3	8.03	43.34	82.4	76.2	91.3	119.9	96.7	106.4	111.6	101	126.8	87.7
A0A1U8ANK7	Thiamine thiazole synthase, chloroplastic OS=Nelumbo nucifera OX=4432 GN=LOC104604883 PE=3 SV=1	32	8	20	8	356	38.1	5.88	44.39	139.9	139.7	138.3	82	84.2	82.8	77.8	76.9	74.8	103.6
A0A1U7Z9U6	protein TIC 40, chloroplastic isoform X1 OS=Nelumbo nucifera OX=4432 GN=LOC104587852 PE=4 SV=1	39	14	17	14	438	47.9	5.76	42.59	121	116.7	117.1	92.1	91	93.3	88.1	89.4	89	102.4
A0A1U7Z035	protein STABILIZED1 OS=Nelumbo nucifera OX=4432 GN=LOC104588885 PE=4 SV=1	19	19	21	19	1020	114.1	8.21	42.7	99.9	105	103.6	100.2	99.9	99.7	97.1	98.5	95.4	100.6
A0A1U8AN84	14-3-3 protein 7-like isoform X4 OS=Nelumbo nucifera OX=4432 GN=LOC104604757 PE=3 SV=1	35	11	28	2	254	29.2	5.21	73.9	106.9	114	109.6	90	94.9	91.5	94.3	96.3	96.1	106.4
A0A1U8BCX6	pyruvate decarboxylase 1 OS=Nelumbo nucifera OX=4432 GN=LOC104612119 PE=3 SV=1	25	11	36	6	589	63.9	6.76	97.05	110.7	116	107.5	91.5	95.3	101.8	102.7	86.9	84.6	102.9
A0A1U7Z767	cinnamoyl-CoA reductase 1-like OS=Nelumbo nucifera OX=4432 GN=LOC104589961 PE=4 SV=1	29	10	22	10	324	35.6	8.19	54.77	82.4	85.3	83.7	109.5	109.5	109	109.5	105.7	106.5	98.9
A0A1U7ZY35	protein TPR1 isoform X1 OS=Nelumbo nucifera OX=4432 GN=LOC104598875 PE=4 SV=1	18	19	22	4	1136	125.2	7.14	42.48	103.3	111.7	101.9	97.6	100	96.7	96.9	91.5	95.2	105.3
A0A1U7Z2Y7	Eukaryotic translation initiation factor 3 subunit C OS=Nelumbo nucifera OX=4432 GN=LOC104590518 PE=3 SV=1	18	20	24	4	944	106.6	5.34	47.56	98	102.6	96.7	96.1	86.6	91.7	100.6	108.9	115.3	103.6
A0A1U7Z9W9	prohibitin-3, mitochondrial OS=Nelumbo nucifera OX=4432 GN=LOC104588336 PE=4 SV=1	38	9	21	1	283	30.9	8.37	62.09	90.3	93.3	92.3	106.3	104.1	104.7	104.2	103.9	102.1	98.9
A0A1U8B1W5	50S ribosomal protein L15, chloroplastic OS=Nelumbo nucifera OX=4432 GN=LOC104609932 PE=3 SV=1	46	11	14	11	270	28.8	10.84	41.49	96.8	94.1	95.3	100.6	99.6	99.8	106.1	105.2	102.1	100.4
A0A1U8A5S4	ADP,ATP carrier protein 1, mitochondrial-like OS=Nelumbo nucifera OX=4432 GN=LOC104599424 PE=3 SV=1	24	9	32	1	379	41.2	9.8	82.81	96.1	93.8	85.6	109.9	102.3	102.3	94.1	108.5	100.1	107.5
A0A1U7YX74	phosphoglucan, water dikinase, chloroplastic isoform X1 OS=Nelumbo nucifera OX=4432 GN=LOC104587978 PE=4 SV=1	18	19	23	19	1197	131.8	6.61	40.96	99.5	101.7	101.2	99.5	105.5	101	94.9	95.5	97.6	103.6
A0A1U7ZJE9	THO complex subunit 4A-like isoform X1 OS=Nelumbo nucifera OX=4432 GN=LOC104594587 PE=4 SV=1	56	12	20	6	241	25.9	10.02	50.05	106.9	112.7	104	92.3	92.3	93.6	101.3	97.1	101.1	98.6
A0A1U7ZFY0	geraniol 8-hydroxylase-like OS=Nelumbo nucifera OX=4432 GN=LOC104594156 PE=3 SV=1	28	15	27	15	523	59.6	8.95	51.23	206.9	205	208.8	47.6	46.1	44.2	43	45.6	43.6	109.2
A0A1U8AY71	remorin-like OS=Nelumbo nucifera OX=4432 GN=LOC104608730 PE=4 SV=1	50	11	20	11	194	21.4	9.16	60.62	69.2	67.5	69.2	117	116.7	116.6	117.4	115.5	113.7	97.2
A0A1U8BDT6	calcyclin-binding protein-like OS=Nelumbo nucifera OX=4432 GN=LOC104610059 PE=4 SV=1	56	11	23	9	217	24.5	8.7	51.28	110.1	106.4	110	96	102.9	99.5	90.7	95.1	90.4	98.9
A0A1U8B9T8	serine--tRNA ligase-like OS=Nelumbo nucifera OX=4432 GN=LOC104612328 PE=4 SV=1	32	15	20	6	447	51.4	6.64	46.28	109	104.5	109	95.8	91.8	96.3	98	98.3	98.7	98.7
A0A1U8BNV4	60S ribosomal protein L8-like OS=Nelumbo nucifera OX=4432 GN=LOC104613127 PE=3 SV=1	38	12	41	2	261	28.3	10.9	84.81	109.6	113.1	114.7	97.4	92.8	96.6	95.4	83.7	91.5	105.2
A0A1U7Z1H4	probable NAD(P)H dehydrogenase (Quinone) FQR1-like 1 isoform X1 OS=Nelumbo nucifera OX=4432 GN=LOC104585721 PE=4 SV=1	41	9	18	1	203	21.4	6.95	42.41	83.1	81.1	79.9	108.4	109.1	107.7	106.2	110.3	119.3	94.8
A0A1U8A111	uncharacterized protein LOC104595635 isoform X1 OS=Nelumbo nucifera OX=4432 GN=LOC104595635 PE=4 SV=1	21	14	24	14	755	81.3	6.2	49.18	101.3	103	100.3	100.6	103.1	103.7	97.3	95.8	95	99.9
A0A1U7ZZ46	probable (S)-N-methylcoclaurine 3'-hydroxylase isozyme 2 OS=Nelumbo nucifera OX=4432 GN=LOC104595104 PE=3 SV=1	27	13	29	13	486	55.2	7.09	72.86	169.9	167.4	171	66.5	68.8	66.1	58.9	61.7	61.2	108.6
A0A1U7ZWY4	aldo-keto reductase family 4 member C9-like OS=Nelumbo nucifera OX=4432 GN=LOC104597090 PE=4 SV=1	39	13	25	8	315	35.5	7.25	64.77	119.4	126.5	121	94.3	83.9	90.6	89.5	79.2	94.2	101.4
A0A1U8ATV3	Proteasome subunit alpha type OS=Nelumbo nucifera OX=4432 GN=LOC104606407 PE=3 SV=1	43	10	17	3	246	27.4	6.32	46.87	107.3	101.6	103.5	101.3	97.4	102.3	92.5	98.6	93.8	101.6
A0A1U7Z472	ras-related protein RABA1d OS=Nelumbo nucifera OX=4432 GN=LOC104586543 PE=4 SV=1	51	11	21	3	219	24.3	5.69	54.9	100.6	100.7	106	103.9	100.1	95.5	99.3	91.3	97.9	104.6
A0A1U7YXI3	Mitochondrial Rho GTPase OS=Nelumbo nucifera OX=4432 GN=LOC104588089 PE=3 SV=1	29	16	21	12	646	71.3	5.53	44.61	96.7	96.7	95.6	105.3	103.7	103	102.6	97.5	98.4	100.4
A0A1U8B865	uncharacterized protein LOC104611767 isoform X1 OS=Nelumbo nucifera OX=4432 GN=LOC104611767 PE=4 SV=1	32	19	23	13	571	62.3	8.95	50.04	109.2	102.8	109.5	96.6	96.7	97	96.5	97.7	96.7	97.4
A0A1U8APA7	dihydrolipoyl dehydrogenase 2, chloroplastic-like OS=Nelumbo nucifera OX=4432 GN=LOC104605099 PE=3 SV=1	28	13	16	3	573	60.9	7.42	48.9	115.5	117.9	124.3	90.2	85.5	93.9	85.7	90.3	91.9	104.8
A0A1U7ZIN4	ADP-ribosylation factor OS=Nelumbo nucifera OX=4432 GN=LOC104591045 PE=3 SV=1	55	8	29	5	181	20.7	6.95	66.4	105.2	110.9	104.8	99.6	97.3	99.1	91.5	91.1	101.2	99.3
A0A1U8B7T2	puromycin-sensitive aminopeptidase-like isoform X1 OS=Nelumbo nucifera OX=4432 GN=LOC104610633 PE=4 SV=1	20	18	24	1	982	110.7	7.18	49.68	129.3	128.6	119.7	80.2	89.9	88.3	89	88.2	88.1	98.6
A0A1U7ZIS0	ran-binding protein 1 homolog b-like OS=Nelumbo nucifera OX=4432 GN=LOC104594939 PE=4 SV=1	39	6	17	6	220	24.2	4.86	35.73	102.5	108	101.8	100.8	100.6	97.1	95.5	96.4	96.2	101.1
A0A1U8A4S8	uncharacterized protein At2g39795, mitochondrial-like OS=Nelumbo nucifera OX=4432 GN=LOC104597094 PE=4 SV=1	54	9	16	9	256	29	4.63	41.75	89.4	89.7	87.6	108.7	105.8	105.7	107.1	104.6	100.3	101.1
A0A1U8Q2R3	DEAD-box ATP-dependent RNA helicase 8-like isoform X1 OS=Nelumbo nucifera OX=4432 GN=LOC104596115 PE=3 SV=1	32	12	22	4	481	54.9	8.69	49.73	115.1	116.1	113.8	94.7	94.2	94.6	88.5	89.4	91.8	101.8
A0A1U8AR29	40S ribosomal protein S8 OS=Nelumbo nucifera OX=4432 GN=LOC104606567 PE=3 SV=1	45	9	22	5	221	24.9	10.48	62.66	105.9	104.8	104.1	99.7	95	98	98.9	100.6	96.2	96.7
A0A1U8A5M0	sedoheptulose-1,7-bisphosphatase, chloroplastic OS=Nelumbo nucifera OX=4432 GN=LOC104597004 PE=3 SV=1	31	11	16	11	393	42.5	6.79	39.05	124.2	123.1	122.1	94.5	94.7	93.8	83.7	81.4	82.8	99.7
A0A1U8A3I7	probable mitochondrial-processing peptidase subunit beta, mitochondrial OS=Nelumbo nucifera OX=4432 GN=LOC104598824 PE=3 SV=1	29	15	23	8	528	58.7	7.23	60.04	95.4	93.1	98.3	101.5	102.5	100.6	104.9	103.8	102.2	97.8
A0A1U8A762	glutathione transferase GST 23-like OS=Nelumbo nucifera OX=4432 GN=LOC104597713 PE=4 SV=1	50	12	20	12	238	26.8	5.08	50.29	122.9	121	123.4	83.2	85.2	84.2	94	92.1	93.3	100.7
A0A1U8BCJ5	E3 ubiquitin-protein ligase UPL2-like isoform X1 OS=Nelumbo nucifera OX=4432 GN=LOC104611964 PE=4 SV=1	4	13	15	1	3670	404.5	5.39	37.69
A0A1U8B8L8	60S ribosomal protein L32-1 OS=Nelumbo nucifera OX=4432 GN=LOC104608383 PE=4 SV=1	42	6	28	2	133	15.6	10.71	61.34	93.7	93.3	85.9	103.9	109.1	107.9	97	96.7	109.1	103.4
A0A1U8B8F4	Proteasome subunit beta OS=Nelumbo nucifera OX=4432 GN=LOC104611835 PE=3 SV=1	55	11	23	11	224	24.7	7.66	64.99	104.3	102.1	102.4	98.5	99.6	97	97.8	95.7	100.9	101.7
A0A1U8B952	ras-related protein RABD1 OS=Nelumbo nucifera OX=4432 GN=LOC104608302 PE=4 SV=1	64	12	23	8	202	22.7	5.73	60	115.8	117.5	115.1	94.6	93.6	94.3	89.4	87.6	91.7	100.5
A0A1U8A4Y4	far upstream element-binding protein 1-like OS=Nelumbo nucifera OX=4432 GN=LOC104600771 PE=4 SV=1	15	11	26	6	738	77.3	6.04	66.05	93.8	95.9	93.9	100.1	105.5	102.2	103.9	104	102.6	98.1
A0A1U8B3T4	GTP-binding protein YPTM2 OS=Nelumbo nucifera OX=4432 GN=LOC104610508 PE=4 SV=1	62	11	24	5	203	22.7	5.43	72.69	114.7	109.2	114.4	94.1	93.3	94	91.3	92.2	94.3	102.3
A0A1U8AGP4	26S proteasome non-ATPase regulatory subunit 4 homolog OS=Nelumbo nucifera OX=4432 GN=LOC104604233 PE=4 SV=1	38	10	21	4	404	42.9	4.67	40.33	108.1	105.6	107.3	101.5	100.2	101.2	92.9	94.4	87.5	101.3
A0A1U8B8W5	reactive Intermediate Deaminase A, chloroplastic isoform X1 OS=Nelumbo nucifera OX=4432 GN=LOC104610923 PE=4 SV=1	45	10	24	10	225	24.2	8.12	66.61	122.3	120.1	121.6	90.2	88	90	89.3	86.2	89.7	102.5
A0A1U7ZGD4	2-Cys peroxiredoxin BAS1, chloroplastic-like OS=Nelumbo nucifera OX=4432 GN=LOC104589865 PE=4 SV=1	37	11	28	4	271	30	8.37	76.27	93.3	93.3	94.9	104	104.8	105.3	101.8	104.7	99.6	98.3
A0A1U8B9Q7	DEAD-box ATP-dependent RNA helicase 8 OS=Nelumbo nucifera OX=4432 GN=LOC104608733 PE=3 SV=1	30	11	20	3	483	55.3	8.59	50.88	99.9	111.3	101.3	99	101.9	98.2	93.7	98.4	94.3	102.2
A0A1U8B0S2	cullin-1-like OS=Nelumbo nucifera OX=4432 GN=LOC104606098 PE=3 SV=1	23	17	24	3	744	86.9	7.2	44.12	105.5	106.7	107.8	98.3	98.8	98	95.3	92.6	95.4	101.7
A0A1U8AQQ3	acetylornithine deacetylase-like OS=Nelumbo nucifera OX=4432 GN=LOC104606478 PE=4 SV=1	27	10	16	10	441	48.5	5.43	43.09	105.5	103.3	104.4	100.4	99.8	106.6	95.5	94	92.7	98
A0A1U8AY57	WPP domain-interacting tail-anchored protein 1-like isoform X1 OS=Nelumbo nucifera OX=4432 GN=LOC104608820 PE=4 SV=1	23	14	17	13	736	82.8	4.86	41.06	95.7	100.1	93.3	100.4	104	103	98	100.1	104.3	101.1
A0A1U8ARF6	Protein transport protein SEC23 OS=Nelumbo nucifera OX=4432 GN=LOC104606673 PE=3 SV=1	22	13	19	11	769	85	5.92	45.34	107.3	107.2	102.3	99.5	99	98	86.4	98.6	98.6	103.2
A0A1U7ZLH0	ras-related protein Rab7 OS=Nelumbo nucifera OX=4432 GN=LOC104595722 PE=4 SV=1	65	11	20	5	206	22.9	5.07	51.08	106.9	108.7	109.7	99.8	99.9	101.1	91.8	91	91	100
A0A1U7YU16	carotenoid 9,10(9',10')-cleavage dioxygenase 1 OS=Nelumbo nucifera OX=4432 GN=LOC104585914 PE=3 SV=1	36	16	21	15	543	61.5	6.6	36.44	101.8	107.2	99.6	102.1	98.5	99.9	92.6	95.4	102.1	100.7
A0A1U8A2Z1	stem-specific protein TSJT1 OS=Nelumbo nucifera OX=4432 GN=LOC104598672 PE=4 SV=1	37	10	28	8	249	26.9	6.34	72.41	65.1	69.5	65	119.7	118.4	120.3	115.9	114.2	116.2	95.5
A0A1U7ZGT7	ran-binding protein 1 homolog b-like OS=Nelumbo nucifera OX=4432 GN=LOC104590398 PE=4 SV=1	55	13	20	13	226	25.4	4.75	36.71	105.3	102.1	105.5	101.6	99.2	98	97.6	100.8	91.9	97.9
A0A1U8A764	ADP,ATP carrier protein 1, mitochondrial OS=Nelumbo nucifera OX=4432 GN=LOC104597454 PE=3 SV=1	20	8	32	2	393	42.8	9.77	75.46	100.7	100.6	103.8	99.2	104.8	99.8	93.9	100	98.8	98.4
A0A1U8B5Q1	uncharacterized protein LOC104610025 OS=Nelumbo nucifera OX=4432 GN=LOC104610025 PE=4 SV=1	60	8	31	7	154	17.6	8.03	70.75	115.4	112.8	115.7	95.1	94.1	96.1	90.3	89.1	88.2	103
A0A1U8AHC2	60S ribosomal protein L28-2 OS=Nelumbo nucifera OX=4432 GN=LOC104604423 PE=4 SV=1	50	11	24	4	150	16.7	10.9	69.17	102.9	98.6	106.6	92.9	95.2	93.6	103.4	104.7	104.8	97.3
A0A1U8B777	protein transport protein SEC13 homolog B OS=Nelumbo nucifera OX=4432 GN=LOC104607985 PE=3 SV=1	41	10	22	6	301	32.5	5.96	55.19	112	111	111	96.9	94.8	95.9	94.3	91.3	92	100.7
A0A1U8AZQ0	Ferredoxin--NADP reductase, chloroplastic OS=Nelumbo nucifera OX=4432 GN=LOC104605546 PE=3 SV=1	31	11	17	11	365	40.8	8.7	43.19	117.9	122	123.5	90.9	89.2	92.2	88.7	86.8	87.6	101.2
A0A1U7ZGX2	26S proteasome non-ATPase regulatory subunit 4 homolog OS=Nelumbo nucifera OX=4432 GN=LOC104590030 PE=4 SV=1	29	9	21	3	404	42.9	4.68	40.08	100.3	105.7	99	100.4	103.8	97	97.8	99.1	94.6	102.4
A0A1U7ZLW1	probable ATP synthase 24 kDa subunit, mitochondrial OS=Nelumbo nucifera OX=4432 GN=LOC104592031 PE=4 SV=1	49	16	26	3	240	27.7	9.09	61.29	94	100.4	101.1	104.4	101.8	95.1	96.5	101.4	102.9	102.4
A0A1U8B838	60S ribosomal protein L13a-4 OS=Nelumbo nucifera OX=4432 GN=LOC104611735 PE=3 SV=1	50	12	44	3	206	23.6	10.54	123.46	105.2	103.9	106.9	95.3	94	94.8	102.7	102	98.5	96.5
A0A1U8AI80	nucleoid-associated protein At2g24020, chloroplastic-like OS=Nelumbo nucifera OX=4432 GN=LOC104603261 PE=4 SV=1	47	9	16	5	196	21.6	8.43	44.22	100.3	101.3	106.6	100.4	95.2	93.5	101.8	99.6	101.6	99.5
A0A1U8AR10	UDP-sugar pyrophosphorylase OS=Nelumbo nucifera OX=4432 GN=LOC104606683 PE=4 SV=1	29	16	22	16	615	67.9	6.05	39.69	104.3	106.2	107.8	99.7	100.2	96.3	94.5	99.3	92.4	99.2
A0A1U8BM63	LOW QUALITY PROTEIN: flowering locus K homology domain OS=Nelumbo nucifera OX=4432 GN=LOC104612405 PE=4 SV=1	30	11	22	8	446	47.3	6.33	41.85	95.5	97.1	93.2	102.7	104.8	105.7	99.8	98.2	100.3	102.7
A0A1U8A802	mitochondrial uncoupling protein 1-like OS=Nelumbo nucifera OX=4432 GN=LOC104601183 PE=3 SV=1	34	9	17	9	303	32.4	9.5	43.44	102.1	101.7	105.5	102.2	100.4	100.8	96.4	93.7	95.6	101.6
A1E2A9	17.1 kDa class II heat shock protein OS=Nelumbo nucifera OX=4432 GN=LOC104609367 PE=2 SV=1	52	7	32	5	156	17.5	6.23	59.68	124.3	122.8	123.5	101.7	94.5	100.2	78.1	77.3	73.9	103.8
A0A1U8B498	puromycin-sensitive aminopeptidase-like isoform X2 OS=Nelumbo nucifera OX=4432 GN=LOC104610633 PE=4 SV=1	20	18	24	1	981	110.6	7.18	48.8	131.3	128.8	132.7	82.6	87	84.8	84	80.9	82.5	105.3
A0A1U7ZL86	V-type proton ATPase subunit C OS=Nelumbo nucifera OX=4432 GN=LOC104591827 PE=3 SV=1	38	12	18	12	375	42.5	5.78	39.35	106.2	108.8	110.4	97.6	97.3	98.2	91.1	96.4	94.3	99.7
A0A1U8A2P2	serine--tRNA ligase-like OS=Nelumbo nucifera OX=4432 GN=LOC104596465 PE=4 SV=1	31	15	23	6	450	51.5	6.8	48.47	109.3	106.9	112.1	100.2	99.3	101.5	88.1	89.8	91.4	101.4
A0A1U7ZZK4	enolase 1, chloroplastic-like OS=Nelumbo nucifera OX=4432 GN=LOC104597800 PE=3 SV=1	32	11	21	3	493	52.9	6.16	55.03	108.6	110.3	109.5	102.1	94.8	106.6	88.3	86.3	90.7	102.7
A0A1U8ABQ4	60S ribosomal protein L22-2 OS=Nelumbo nucifera OX=4432 GN=LOC104598935 PE=4 SV=1	61	8	35	5	124	14	9.55	78.01	106.7	106	106.5	98	96.7	98.4	96.5	98	93.1	100.1
A0A1U8BCL9	apoptosis inhibitor 5-like protein API5 isoform X1 OS=Nelumbo nucifera OX=4432 GN=LOC104613177 PE=4 SV=1	27	14	20	6	547	60.9	8.56	36.48	98.2	109.1	101.4	98.7	97	95.4	101.9	97	100.2	101.2
A0A1U8ALW6	uncharacterized protein LOC104601640 OS=Nelumbo nucifera OX=4432 GN=LOC104601640 PE=4 SV=1	37	9	20	9	321	35.7	5.36	44.29	82.3	82.9	82.3	108.6	108.7	108.4	108.4	111.5	108.7	98.2
A0A1U7ZZT9	ornithine carbamoyltransferase, chloroplastic-like OS=Nelumbo nucifera OX=4432 GN=LOC104595651 PE=3 SV=1	32	10	20	10	383	42.2	8.03	46.24	139.2	139.1	136.5	88.7	85.2	84.2	74	77.8	74.2	101.3
A0A1U7ZB77	Protoporphyrinogen oxidase OS=Nelumbo nucifera OX=4432 GN=LOC104592929 PE=3 SV=1	36	17	21	17	514	57.1	8.78	46.42	89.6	89.5	87	105.2	107.1	105.5	109.7	101.6	104.9	100
A0A1U7ZAP4	ribulose bisphosphate carboxylase/oxygenase activase, chloroplastic-like isoform X1 OS=Nelumbo nucifera OX=4432 GN=LOC104591115 PE=4 SV=1	33	11	16	4	472	51.6	5.91	38.94	139.9	138.8	132.2	83.5	83.8	83.9	79	78	77.7	103.3
A0A1U8A0H6	argininosuccinate lyase, chloroplastic OS=Nelumbo nucifera OX=4432 GN=LOC104595496 PE=3 SV=1	33	14	18	14	528	59.3	5.82	42.69	110.3	110.8	108.8	97.6	97.4	95.5	90.8	93.9	90.1	104.9
A0A1U8AZ18	H/ACA ribonucleoprotein complex subunit 4 OS=Nelumbo nucifera OX=4432 GN=LOC104609065 PE=4 SV=1	26	15	20	15	613	68.5	9.32	36.41	109	109.9	106.4	95.6	97.8	94	97.2	95.2	99	96
A0A1U8A1U3	probable fructokinase-7 OS=Nelumbo nucifera OX=4432 GN=LOC104596223 PE=3 SV=1	36	11	18	10	343	36.9	7.8	43.65	77.4	79.2	73.4	108.6	107.2	106	121.4	116.1	113.4	97.2
A0A1U8BAN3	uridine 5'-monophosphate synthase OS=Nelumbo nucifera OX=4432 GN=LOC104608808 PE=3 SV=1	34	14	23	14	471	51.1	6.87	50.29	104.4	107.5	103.2	96.5	95.1	97.6	97.1	98.1	100.2	100.3
A0A1U7ZVA1	Serine/threonine-protein phosphatase OS=Nelumbo nucifera OX=4432 GN=LOC104597631 PE=3 SV=1	30	7	19	5	313	35.7	5.5	44.06	105.8	104.8	102.8	100.5	101.9	96.8	95.7	91.6	98.9	101.3
A0A1U7ZDR5	Dihydroorotate dehydrogenase (quinone), mitochondrial OS=Nelumbo nucifera OX=4432 GN=LOC104592016 PE=3 SV=1	22	10	23	10	455	48.5	9.17	45.85	90	88.6	88.4	104.7	108.6	106.6	105	105	102.1	101.1
A0A1U8AV82	asparagine--tRNA ligase, cytoplasmic 1-like OS=Nelumbo nucifera OX=4432 GN=LOC104606762 PE=3 SV=1	20	12	20	6	568	63.7	6.21	47.52	110.9	111	108.6	96.9	96.5	98.4	90.8	93.6	91.3	102
A0A1U7Z7W5	Phosphotransferase OS=Nelumbo nucifera OX=4432 GN=LOC104592043 PE=3 SV=1	30	10	17	7	498	53.9	6.19	36.88	100.6	103.6	102.8	105	100.1	101.3	91.4	97.1	95.2	102.9
A0A1U7ZJ60	serrate RNA effector molecule OS=Nelumbo nucifera OX=4432 GN=LOC104593468 PE=4 SV=1	22	14	16	14	749	84.8	7.72	32.76	99.6	100.4	97.4	97.7	97.8	99.3	101.9	100.8	102.3	102.9
A0A1U8Q2D5	11S globulin seed storage protein G3-like OS=Nelumbo nucifera OX=4432 GN=LOC104591185 PE=4 SV=1	39	7	36	1	214	24	5.29	92.56	90.1	92.1	91.3	89.1	92.3	89.4	118	118.8	122.6	96.4
A0A1U8AKU9	ubiquitin-conjugating enzyme E2 variant 1C OS=Nelumbo nucifera OX=4432 GN=LOC104601353 PE=4 SV=1	62	8	21	5	146	16.6	6.68	49.23	120.9	121.1	125.1	86.9	86.7	90.6	87.2	89.7	89.4	102.4
A0A1U7ZB65	Proteasome subunit beta OS=Nelumbo nucifera OX=4432 GN=LOC104592922 PE=3 SV=1	31	8	23	2	272	29.2	6.55	51.22	101.9	104.8	103.8	96.5	97.8	101.6	99.4	97.2	97.5	99.5
A0A1U8B7H9	Eukaryotic translation initiation factor 3 subunit J OS=Nelumbo nucifera OX=4432 GN=LOC104607855 PE=3 SV=1	63	13	22	8	222	25.4	4.84	52.62	107.1	104.2	107.1	97.7	96.5	97.2	98.1	97.5	94.7	99.7
A0A1U8A383	rhodanese-like domain-containing protein 4, chloroplastic OS=Nelumbo nucifera OX=4432 GN=LOC104600333 PE=4 SV=1	30	13	19	12	450	47.6	5.19	50.04	97.6	97.5	96.7	108.6	107.7	106.4	94.4	90.9	99.1	101
A0A1U7ZB04	Proteasome subunit beta OS=Nelumbo nucifera OX=4432 GN=LOC104588637 PE=3 SV=1	45	8	18	8	245	27.6	8.47	47.48	105.8	106.4	107.7	95.1	96.5	96.8	101.1	95.9	95.2	99.6
A0A1U7Z0P0	60S acidic ribosomal protein P2-like OS=Nelumbo nucifera OX=4432 GN=LOC104588014 PE=3 SV=1	78	9	18	3	114	11.5	4.45	46.33	105.6	103.6	108.1	101.5	95.5	97.4	95.6	97.6	97.4	97.6
A0A1U8A804	Glycosyltransferase OS=Nelumbo nucifera OX=4432 GN=LOC104601720 PE=3 SV=1	28	7	13	7	496	55.7	6.19	33.02	75.9	76.6	77.3	106.6	105.8	109.4	116.5	118.1	121.1	92.8
A0A1U7ZCP5	RuvB-like helicase OS=Nelumbo nucifera OX=4432 GN=LOC104591710 PE=3 SV=1	29	10	16	3	456	49.8	5.69	37.28	100.6	122.4	87.8	98.5	102.6	101.4	93.7	80	97.8	115.2
A0A1U8AB62	UDP-glucose 6-dehydrogenase OS=Nelumbo nucifera OX=4432 GN=LOC104598792 PE=3 SV=1	23	9	19	2	480	53	7.08	52.99	116.1	112.8	116.1	81.1	82.2	83	105.2	104.4	106.6	92.6
A0A1U8B1V2	translationally-controlled tumor protein homolog OS=Nelumbo nucifera OX=4432 GN=LOC104606169 PE=3 SV=1	66	9	30	6	168	19.1	4.68	62.98	95.6	95.7	96.6	103.2	98.8	98.6	100.5	102.3	107.9	101
A0A1U8APW3	Eukaryotic translation initiation factor 3 subunit E OS=Nelumbo nucifera OX=4432 GN=LOC104606256 PE=3 SV=1	33	10	17	1	439	51.6	5.74	38.51	123.9	123	119.5	88.9	84.1	91	92.3	91.2	77.6	108.4
A0A1U7YWF7	uncharacterized protein LOC104587722 isoform X1 OS=Nelumbo nucifera OX=4432 GN=LOC104587722 PE=4 SV=1	13	9	18	9	675	76	5.62	43.38	83.4	85.4	82.5	110.8	108.5	109.7	110.4	105.8	105.9	97.7
A0A1U7ZP45	U2 small nuclear ribonucleoprotein A' isoform X1 OS=Nelumbo nucifera OX=4432 GN=LOC104592667 PE=4 SV=1	39	10	16	10	288	32.7	5.39	39.97	98.8	99.5	100.8	99.9	100.4	102.7	98.4	94.5	108.7	96.4
A0A1U8AFR9	enoyl-[acyl-carrier-protein] reductase [NADH], chloroplastic OS=Nelumbo nucifera OX=4432 GN=LOC104603532 PE=4 SV=1	30	9	22	9	391	41.4	8.79	58.47	102.3	100.4	101.3	101	100.1	96.7	100.6	99.4	97.4	101
A0A1U8AIP4	26S proteasome non-ATPase regulatory subunit 8 homolog A-like OS=Nelumbo nucifera OX=4432 GN=LOC104604762 PE=4 SV=1	42	10	18	6	267	31	4.88	37.13	104.3	100.9	102.4	100.6	104.2	100.4	93.8	93.7	97.7	101.9
A0A1U7Z3E1	aspartate, glycine, lysine and serine-rich protein-like OS=Nelumbo nucifera OX=4432 GN=LOC104589889 PE=4 SV=1	40	12	18	12	442	47.4	8.31	46.14	156.9	153.8	158.4	72.7	72.1	70.8	68.1	71.3	71.2	104.7
A0A1U7YS60	50S ribosomal protein L12, chloroplastic-like OS=Nelumbo nucifera OX=4432 GN=LOC104587230 PE=3 SV=1	40	9	19	4	189	20.1	6.06	47.9	102.9	99.6	102.9	97.4	96.2	98	105.4	101.7	97.6	98.3
A0A1U8AIE0	micronuclear linker histone polyprotein-like OS=Nelumbo nucifera OX=4432 GN=LOC104603322 PE=4 SV=1	18	16	21	13	941	102.1	8.92	42.94	109.5	110.6	108.9	94.8	92.2	93.5	94.7	97.9	95.9	102
A0A1U8B1K2	FT-interacting protein 1-like OS=Nelumbo nucifera OX=4432 GN=LOC104608707 PE=4 SV=1	18	13	16	13	1009	114.7	9.06	39.01	98.8	94.4	99.2	100.3	100.8	100.8	103	101.1	98.8	102.8
A0A1U8Q9U6	(RS)-norcoclaurine 6-O-methyltransferase-like isoform X1 OS=Nelumbo nucifera OX=4432 GN=LOC109115720 PE=3 SV=1	33	11	22	7	348	38.2	5.22	51.84	148.1	157.3	155.6	77	72.4	76	75.1	66.5	68.3	103.7
A0A1U7Z275	3-isopropylmalate dehydrogenase OS=Nelumbo nucifera OX=4432 GN=LOC104588498 PE=3 SV=1	40	13	18	13	403	43.4	6.71	39.71	112.6	110.7	110.5	98.6	98.2	96.8	91.5	90.8	88.6	101.7
A0A1U8AB17	eukaryotic peptide chain release factor subunit 1-3-like OS=Nelumbo nucifera OX=4432 GN=LOC104598488 PE=4 SV=1	29	11	17	11	436	48.9	5.72	44.71	105	109.2	105.5	97.6	95.9	99.5	98.1	92.1	95.5	101.4
A0A1U7Z7G4	Beta-galactosidase OS=Nelumbo nucifera OX=4432 GN=LOC104587560 PE=3 SV=1	22	18	28	18	854	95	6.32	53.44	89.5	88	88.1	108.7	109	111.8	101	103.9	100.4	99.7
A0A1U7ZIZ4	ATP-dependent RNA helicase DBP2-like OS=Nelumbo nucifera OX=4432 GN=LOC104594469 PE=3 SV=1	31	14	22	12	572	62.6	7.87	42.75	103.9	105.8	106.2	101.5	102.5	101.2	91.1	95.8	92.3	99.6
A0A1U8ACY2	glutathione S-transferase DHAR2-like OS=Nelumbo nucifera OX=4432 GN=LOC104599264 PE=3 SV=1	56	9	17	8	212	23.6	5.87	39.74	127.9	123.4	127.9	85.9	86.5	89.5	86.2	84.7	85.8	102.2
A0A1U8BHV2	bifunctional D-cysteine desulfhydrase/1-aminocyclopropane-1-carboxylate deaminase, mitochondrial isoform X1 OS=Nelumbo nucifera OX=4432 GN=LOC104611027 PE=4 SV=1	29	12	22	12	419	45.8	8.46	59.22	104.1	105.6	107.5	98.4	94.5	97.7	97.7	99.4	94.3	100.8
A0A1U8AIB5	Eukaryotic translation initiation factor 5A OS=Nelumbo nucifera OX=4432 GN=LOC104603299 PE=3 SV=1	58	9	39	3	160	17.5	5.99	75.27	90	88.8	87.1	105.9	105.6	103.4	108.1	106.5	105.2	99.4
A0A1U8B3L9	peroxiredoxin Q, chloroplastic OS=Nelumbo nucifera OX=4432 GN=LOC104609308 PE=4 SV=1	49	9	19	9	214	23.5	9.51	46.58	95.3	96.4	95.8	109	104.2	108.2	97.9	93.9	98.6	100.8
A0A1U7ZI08	probable trans-2-enoyl-CoA reductase, mitochondrial OS=Nelumbo nucifera OX=4432 GN=LOC104593129 PE=4 SV=1	60	8	17	8	181	20.1	9.1	49.08	103.2	101.7	106.2	99.8	95.8	94.9	97.1	98.6	100.5	102.2
A0A1U8Q6L8	protein FLX-like 3 OS=Nelumbo nucifera OX=4432 GN=LOC104601892 PE=4 SV=1	45	10	24	10	266	30.2	7.28	57.57	105.1	107	105.2	99.3	98.9	99.4	94.1	94.8	95	101.1
A0A1U8A2C2	probable mediator of RNA polymerase II transcription subunit 36b OS=Nelumbo nucifera OX=4432 GN=LOC104596020 PE=3 SV=1	42	11	18	3	303	32	10.29	45.61	117.6	112.5	114.5	90.7	93.2	90.5	94.4	94.3	93.7	98.5
A0A1U7ZJQ0	E3 UFM1-protein ligase 1 homolog OS=Nelumbo nucifera OX=4432 GN=LOC104594669 PE=4 SV=1	22	15	18	15	818	90.8	5.71	32.81	96.2	99.9	97.4	98.6	100.7	104.2	97	100.4	98.9	106.5
A0A1U8ADL9	probable methyltransferase PMT3 OS=Nelumbo nucifera OX=4432 GN=LOC104602864 PE=4 SV=1	33	16	19	16	621	70.6	6.83	32.05	127.8	130.6	126.8	85.4	94	90.4	78.4	80.5	81	105
A0A1U8A4S5	26S proteasome non-ATPase regulatory subunit 8 homolog A-like OS=Nelumbo nucifera OX=4432 GN=LOC104599145 PE=4 SV=1	35	8	14	4	267	30.8	4.96	33.94	108.3	114.6	103.3	94.3	96.8	96.2	90	93.3	92.9	110.3
A0A1U7ZCI9	KH domain-containing protein HEN4-like OS=Nelumbo nucifera OX=4432 GN=LOC104589110 PE=4 SV=1	31	17	18	17	708	75.6	6.47	42.93	100	105.1	102.9	98.2	103.3	100.1	92.8	96.2	98.2	103.3
A0A1U7ZFK1	UBP1-associated protein 2A OS=Nelumbo nucifera OX=4432 GN=LOC104593504 PE=4 SV=1	29	13	20	13	508	54.4	5.27	33.93	99.8	102.1	98.7	100	101.4	100.8	99.8	100.4	98.2	98.9
A0A1U8BAY1	40S ribosomal protein S10-1-like OS=Nelumbo nucifera OX=4432 GN=LOC104611513 PE=4 SV=1	42	8	40	1	180	19.9	9.67	108.62	103	105.3	105.9	98.7	95	96.2	94.7	96.9	103.1	101.3
A0A1U7ZAM4	60S ribosomal protein L28-2-like OS=Nelumbo nucifera OX=4432 GN=LOC104591090 PE=4 SV=1	52	10	23	3	150	16.7	11.06	62.45	97	98.8	102.4	94.5	89.2	92.6	114.3	110	106.9	94.4
A0A1U8BPC5	uncharacterized protein LOC104613042 OS=Nelumbo nucifera OX=4432 GN=LOC104613042 PE=4 SV=1	18	12	22	7	628	68.3	8.66	59.28	112.4	109.3	110.9	97.3	97.5	97.7	90.9	92.7	90.2	101.2
A0A1U8B578	calcium-dependent protein kinase 2-like OS=Nelumbo nucifera OX=4432 GN=LOC104610927 PE=4 SV=1	25	14	18	6	538	60.6	6.71	42.54	115.2	115	114.4	91.7	91	87.8	92.9	97.6	92.8	101.5
A0A1U7ZPV5	oxalate--CoA ligase-like OS=Nelumbo nucifera OX=4432 GN=LOC104596092 PE=4 SV=1	25	11	16	11	525	56.6	6.65	41.52	43.1	45.1	43.5	126.2	121.9	127.1	135.9	132.7	132.4	92.1
A0A1U7YPG9	uncharacterized protein LOC104586381 OS=Nelumbo nucifera OX=4432 GN=LOC104586381 PE=3 SV=1	34	15	18	15	534	59.7	6.86	36.28	115.6	112.6	106.1	102.8	99.9	96	87.3	89.4	90.6	99.6
A0A1U8A8R4	Serine/threonine-protein phosphatase OS=Nelumbo nucifera OX=4432 GN=LOC104601422 PE=3 SV=1	18	14	18	6	1015	108.3	6.21	34.43	107.7	113.4	102.7	98.2	100.1	100.2	87	92	88.6	110
A0A1U7ZRF4	uncharacterized protein LOC104596534 OS=Nelumbo nucifera OX=4432 GN=LOC104596534 PE=4 SV=1	27	16	21	10	578	63.1	9.04	48.07	125	133.3	128.6	86.7	85.4	84.9	82.2	77.2	90.5	106.2
A0A1U8AG01	40S ribosomal protein S10-1 OS=Nelumbo nucifera OX=4432 GN=LOC104600196 PE=4 SV=1	46	9	39	2	181	20.1	9.67	108.16	109	109.8	108.8	97	94.9	95.1	94.9	94.8	95	100.7
A0A1U7YZ03	uncharacterized protein LOC104587464 OS=Nelumbo nucifera OX=4432 GN=LOC104587464 PE=4 SV=1	54	9	19	9	142	15.6	4.55	53.01	42.1	45.4	43.3	129.4	121.6	126.8	135.5	132.9	130.5	92.5
A0A1U7ZND0	Arginine biosynthesis bifunctional protein ArgJ, chloroplastic OS=Nelumbo nucifera OX=4432 GN=LOC104594597 PE=3 SV=1	28	10	20	10	469	49.1	7.62	48.16	98.4	98.4	97.3	100.4	103.9	115.9	94.9	98.6	94.3	98.1
A0A1U8AXX7	probable pre-mRNA-splicing factor ATP-dependent RNA helicase DEAH2 isoform X1 OS=Nelumbo nucifera OX=4432 GN=LOC104605025 PE=4 SV=1	24	14	17	14	723	82.4	7.65	40.3	103.6	102.5	106.7	99.1	102.7	101.5	95.8	93.8	92.9	101.4
A0A1U8AGN8	protein RAE1 OS=Nelumbo nucifera OX=4432 GN=LOC104600042 PE=4 SV=1	39	9	17	9	350	38.9	8.43	29.29	105.7	108.7	99.3	91.7	100.4	95.5	93.6	99.7	104.3	101
A0A1U7ZS67	60S ribosomal protein L27a-3 OS=Nelumbo nucifera OX=4432 GN=LOC104593099 PE=3 SV=1	48	8	31	2	146	16.4	10.49	71.45	102	102.9	103	97.2	98	103.6	98.4	97.3	97.5	100.1
A0A1U8A0Q2	basic blue protein-like OS=Nelumbo nucifera OX=4432 GN=LOC104599570 PE=4 SV=1	38	4	20	4	126	13.4	9.45	54.7	105.1	106.6	104.8	106.4	106.1	108.6	87.1	87.6	86.7	100.9
A3FPF7	Peroxidase OS=Nelumbo nucifera OX=4432 GN=CP PE=2 SV=1	37	10	17	3	331	37.5	8.16	43.26	181	179.4	176.2	59.5	60.8	60.8	56.3	58.3	55.8	111.9
A0A1U8B8Q8	ADP,ATP carrier protein 3, mitochondrial-like isoform X1 OS=Nelumbo nucifera OX=4432 GN=LOC104608195 PE=3 SV=1	22	9	31	3	398	43.5	9.73	79.17	96.5	95.1	97.5	107.6	104.1	106.9	101.1	99	94.7	97.5
A0A1U7Z422	probable methionine--tRNA ligase OS=Nelumbo nucifera OX=4432 GN=LOC104590895 PE=3 SV=1	26	17	21	11	806	90.4	6.93	37.49	108.4	107.8	106.7	95.8	97.7	94.9	95.8	94.7	95.9	102.2
A0A1U7YWK3	ABC transporter G family member 7 OS=Nelumbo nucifera OX=4432 GN=LOC104587769 PE=4 SV=1	23	17	20	17	728	79.9	7.88	40.25	112.2	110.1	109.1	94.8	98	98.7	93.9	92.3	91.1	99.8
A0A1U8ACU7	Chalcone-flavonone isomerase family protein OS=Nelumbo nucifera OX=4432 GN=LOC104599237 PE=3 SV=1	47	12	18	12	446	48.5	5.1	35.28	133.7	133.7	134.1	87.2	84.3	85.7	79.2	78.4	79.4	104.3
A0A1U8A2H5	inositol-3-phosphate synthase OS=Nelumbo nucifera OX=4432 GN=LOC104600092 PE=4 SV=1	26	11	26	1	510	56.5	5.66	61.62	117.9	114.5	123.1	86.2	94.5	99.3	99.2	88.6	76.2	100.6
A0A1U8ALK8	alpha-xylosidase 1 OS=Nelumbo nucifera OX=4432 GN=LOC104601799 PE=3 SV=1	16	13	24	7	930	103.9	5.86	48.36	108.1	99.8	103.2	99.3	101.1	97.6	101.3	97.8	95.5	96.4
A0A1U8ADJ3	pentatricopeptide repeat-containing protein At4g35850, mitochondrial OS=Nelumbo nucifera OX=4432 GN=LOC104603277 PE=4 SV=1	24	11	15	11	441	49.4	7.71	35.74	110.8	107.2	109.7	95.7	100.6	100.2	91.2	92.5	92.1	100
A0A1U7ZUV7	glutathione S-transferase U17-like OS=Nelumbo nucifera OX=4432 GN=LOC104596470 PE=4 SV=1	36	10	28	10	235	25.9	6.58	62.12	118.1	117.5	119	92.2	91.2	92.8	89.2	89.9	88.4	101.5
A0A1U8AX57	aminoacylase-1 OS=Nelumbo nucifera OX=4432 GN=LOC104608485 PE=4 SV=1	32	11	16	11	451	50.3	7.03	46.76	96.7	100.8	99.3	103.7	105.4	102.3	96.9	97.1	96.6	101.1
A0A1U8AX64	Importin subunit alpha OS=Nelumbo nucifera OX=4432 GN=LOC104605023 PE=3 SV=1	29	12	19	3	533	59.2	5.39	35.21	107.4	108.5	110.7	93.8	97.1	97.8	91.4	93.6	96.4	103.3
A0A1U8ADE8	proton pump-interactor 1-like OS=Nelumbo nucifera OX=4432 GN=LOC104599404 PE=4 SV=1	22	12	16	9	620	70.1	8.82	37.4	147.1	144.2	139.7	85.8	80.1	81.8	72	70.5	70.7	108.2
A0A1U7ZAU3	S-formylglutathione hydrolase-like OS=Nelumbo nucifera OX=4432 GN=LOC104591176 PE=4 SV=1	59	5	19	5	107	11.9	7.37	62.02	103.7	102.4	103.1	99.2	103.1	99.3	96.1	97.6	95	100.6
A0A1U7ZU81	aspartate carbamoyltransferase 1, chloroplastic-like OS=Nelumbo nucifera OX=4432 GN=LOC104594081 PE=3 SV=1	30	12	21	4	395	44.4	6.81	45.34	89.8	89.5	85.5	108.3	106.7	109.9	108.1	107.2	95.3	99.8
A0A1U7ZXC1	ABC transporter B family member 19 OS=Nelumbo nucifera OX=4432 GN=LOC104597187 PE=4 SV=1	14	15	16	14	1249	135.9	8.29	33.35	136	136.5	139.5	82	83.2	79.5	82.5	75.6	77.8	107.5
A0A1U8AKI2	TPR repeat-containing thioredoxin TDX isoform X1 OS=Nelumbo nucifera OX=4432 GN=LOC104605220 PE=4 SV=1	30	11	18	9	383	42.4	5.29	45.94	108.6	105.3	104.7	95.5	93.5	94.3	97.5	100.8	99.9	99.9
A0A1U7YTD3	probable aldehyde dehydrogenase OS=Nelumbo nucifera OX=4432 GN=LOC104586749 PE=4 SV=1	28	12	18	12	555	62.1	7.17	40.86	95.4	93.5	96.7	99.1	104.6	102.4	104.1	99.4	101.6	103.1
A0A1U8B5R3	Glutamate decarboxylase OS=Nelumbo nucifera OX=4432 GN=LOC104611028 PE=3 SV=1	23	10	18	7	495	55.8	5.83	39.8	70.1	70.7	69.9	113.1	112.5	114	117.1	121.3	114.4	97
A0A1U7ZD01	CBS domain-containing protein CBSX3, mitochondrial-like OS=Nelumbo nucifera OX=4432 GN=LOC104593392 PE=4 SV=1	44	9	31	7	205	22.8	9.32	65.23	127.3	130.7	126.6	85.4	85.3	88.3	85.1	85.5	83.4	102.5
A0A1U8ALQ4	translocase of chloroplast 120, chloroplastic-like isoform X1 OS=Nelumbo nucifera OX=4432 GN=LOC104601600 PE=4 SV=1	12	16	19	7	1325	144.4	4.84	39.36	102.1	102.7	105.4	101.9	94.7	100.2	103	94.1	93.9	102
A0A1U7ZTF0	protein transport protein Sec24-like At4g32640 isoform X1 OS=Nelumbo nucifera OX=4432 GN=LOC104593849 PE=4 SV=1	14	13	16	13	1107	119.5	7.59	36.91	107.5	109.6	99.3	104.9	102.5	101.8	94	90.9	91.4	98.2
A0A1U7ZLC3	Lactoylglutathione lyase OS=Nelumbo nucifera OX=4432 GN=LOC104595134 PE=3 SV=1	24	9	21	8	367	40.6	7.74	51.25	115.2	113.5	114.6	91.7	95.5	93.8	90.8	91	91.6	102.2
A0A1U7ZW11	DEAD-box ATP-dependent RNA helicase 53-like OS=Nelumbo nucifera OX=4432 GN=LOC104598327 PE=4 SV=1	29	16	20	16	639	68.1	9.25	40.03	94.6	100.3	97.3	98.1	105.9	101.4	95.6	101.5	102.8	102.6
A0A1U8B3V7	Nucleoside diphosphate kinase OS=Nelumbo nucifera OX=4432 GN=LOC104610523 PE=3 SV=1	37	6	30	5	148	16.3	6.8	85.79	104.6	104	102.8	98.9	96.7	98.6	99.5	98.2	94.9	101.8
A0A1U7YUT9	subtilisin-like protease SBT2.4 OS=Nelumbo nucifera OX=4432 GN=LOC104588057 PE=4 SV=1	17	9	15	9	826	87.7	6.62	37.58	114.4	109.2	107	96.7	93.8	96.4	94	97.6	91	99.9
A0A1U8B156	60S ribosomal protein L18-3 OS=Nelumbo nucifera OX=4432 GN=LOC104606198 PE=4 SV=1	42	7	27	1	187	21	11.43	59.57	101.2	99.1	105.1	91.7	97.5	98.9	104.3	109.9	91.1	101.3
A0A1U7ZPW9	Pyruvate dehydrogenase E1 component subunit alpha OS=Nelumbo nucifera OX=4432 GN=LOC104596102 PE=4 SV=1	33	13	21	8	399	43.9	7.94	47.7	98.6	98.6	96.2	100.2	100.9	106.3	98.6	100.7	99	100.9
A0A1U7ZIN7	probable pectinesterase/pectinesterase inhibitor 36 OS=Nelumbo nucifera OX=4432 GN=LOC104590575 PE=4 SV=1	15	8	17	8	515	57.3	8.37	45.3	82.1	83.3	82.7	113.6	117.4	113.6	101.4	102.9	104.3	98.7
A0A1U8Q428	Lon protease homolog, mitochondrial OS=Nelumbo nucifera OX=4432 GN=LOC104598789 PE=3 SV=1	11	11	15	2	1030	114.1	6.4	32.86	95.9	121.5	91.6	101.4	98.6	96.6	94.8	94.3	107.1	98.3
A0A1U7YTB8	mitochondrial outer membrane protein porin of 36 kDa OS=Nelumbo nucifera OX=4432 GN=LOC104586738 PE=4 SV=1	29	8	17	5	276	29.5	9.16	41.37	90.8	89.1	93	109.5	104.7	104	104.5	105.7	101.1	97.5
A0A1U8AW84	proton pump-interactor 1 OS=Nelumbo nucifera OX=4432 GN=LOC104608210 PE=4 SV=1	21	12	14	9	614	70.1	9.1	39.47	148.5	151.4	150.5	75.8	76.2	74.6	72.4	70.9	72.7	107
A0A1U7ZSY6	LETM1 and EF-hand domain-containing protein 1, mitochondrial-like OS=Nelumbo nucifera OX=4432 GN=LOC104593337 PE=4 SV=1	21	13	16	13	759	85.9	6.19	33.26	98	101.8	95.7	100.4	97.7	100.3	102.4	102.1	101	100.5
A0A1U7ZRT7	dihydrolipoyllysine-residue succinyltransferase component of 2-oxoglutarate dehydrogenase complex 2, mitochondrial-like OS=Nelumbo nucifera OX=4432 GN=LOC104596619 PE=4 SV=1	27	13	20	6	478	51.8	9.17	41.78	97	95.8	98	101	101	102.9	99.2	101.4	102.8	100.9
A0A1U7YQ39	Eukaryotic translation initiation factor 3 subunit G OS=Nelumbo nucifera OX=4432 GN=LOC104586573 PE=3 SV=1	48	12	23	1	303	33.5	8.69	54.85	132	133.9	137.9	81.8	81.1	83	84.3	88.6	74.3	103.2
A0A1U8A4A7	bifunctional aspartate aminotransferase and glutamate/aspartate-prephenate aminotransferase-like OS=Nelumbo nucifera OX=4432 GN=LOC104600083 PE=4 SV=1	25	8	13	6	486	52.4	8.57	39.63	122	121	124	90.3	89.8	89.1	84.5	85.4	90.2	103.7
A0A1U7ZDQ4	11-beta-hydroxysteroid dehydrogenase 1B-like OS=Nelumbo nucifera OX=4432 GN=LOC104592001 PE=3 SV=1	38	10	19	10	351	39.4	8.73	52.61	69.6	69.5	70.6	111.6	116.8	114.2	118.3	117.4	115.5	96.7
A0A1U8A4D6	cullin-1 OS=Nelumbo nucifera OX=4432 GN=LOC104599020 PE=3 SV=1	21	15	21	1	744	86.8	7.08	37.02	108	104.4	105	96.5	95	96.5	98	99.5	93.8	103.3
A0A1U8B3U2	phosphoenolpyruvate carboxykinase [ATP] OS=Nelumbo nucifera OX=4432 GN=LOC104610545 PE=3 SV=1	23	12	16	12	662	73	7.08	34.06	160.3	159.1	164.6	68.4	73.3	76	60.2	64.4	65.7	108.1
A0A1U7YQY6	Eukaryotic translation initiation factor 3 subunit G OS=Nelumbo nucifera OX=4432 GN=LOC104585956 PE=3 SV=1	52	13	23	2	303	33.4	8.87	55.07	106.3	108.1	107	94.4	97.9	95.9	93.5	97.8	99.1	99.9
A0A1U7ZP49	isovaleryl-CoA dehydrogenase, mitochondrial OS=Nelumbo nucifera OX=4432 GN=LOC104594804 PE=3 SV=1	32	10	16	10	407	44.4	6.9	39.24	83.4	82.4	81.3	103.3	108.2	106.4	105.3	111	117.6	101
A0A1U8AYX1	Eukaryotic translation initiation factor 3 subunit H OS=Nelumbo nucifera OX=4432 GN=LOC104605294 PE=3 SV=1	29	8	13	2	388	44.4	5.33	35.45	114.2	125	132.9	91.6	98	94.8	82.9	91.2	70.8	98.7
A0A1U7YV76	ras-related protein RIC1 OS=Nelumbo nucifera OX=4432 GN=LOC104588195 PE=4 SV=1	50	10	23	4	204	22.7	5.43	66.53	95.2	96.5	89.7	107.7	102.9	101.1	107.2	92.3	111.9	95.5
A0A1U8ABL6	60S ribosomal protein L18-3 OS=Nelumbo nucifera OX=4432 GN=LOC104598903 PE=4 SV=1	42	7	28	1	187	20.9	11.44	64.31	103.3	99.6	103.1	98.5	97.2	98	97.1	101.3	100.1	101.8
A0A1U8AI74	60S acidic ribosomal protein P1 OS=Nelumbo nucifera OX=4432 GN=LOC104604643 PE=3 SV=1	67	4	15	2	111	11.3	4.37	32.85	105.7	103.5	107.6	94.8	99.2	98.9	102.5	99.2	93.6	95
F1CFD6	Catalase OS=Nelumbo nucifera OX=4432 GN=LOC104603756 PE=2 SV=1	26	11	24	5	492	56.9	7.27	51.55	100	101.1	98.7	94.7	102.6	99.1	98.8	98.9	101.5	104.5
A3FPF4	Thioredoxin-dependent peroxidase OS=Nelumbo nucifera OX=4432 GN=TDP PE=2 SV=1	40	6	46	6	162	17.5	5.58	100.83	114.3	111.4	113.8	92.8	92.2	92.4	97.1	93.6	91.4	100.8
A0A1U7YXM0	polyphenol oxidase, chloroplastic-like OS=Nelumbo nucifera OX=4432 GN=LOC104588895 PE=4 SV=1	25	11	16	11	597	67.1	8.15	35.66	99.6	97.5	98.2	105.1	104.3	105.4	98.1	94.4	99.4	98
A0A1U8AMH1	gamma carbonic anhydrase 1, mitochondrial OS=Nelumbo nucifera OX=4432 GN=LOC104601832 PE=4 SV=1	46	10	23	4	271	29.5	6.42	59.84	102.6	101.8	101.3	95.7	99.6	96.3	98.7	101.1	102	101
A0A1U7YWY8	vicilin-like antimicrobial peptides 2-2 OS=Nelumbo nucifera OX=4432 GN=LOC104586827 PE=4 SV=1	14	5	107	1	315	35.3	8.75	166.32	58	70.6	65.3	133.3	143	147.9	96.1	90.8	99	96
F6GPZ4	Photosystem II CP43 reaction center protein OS=Nelumbo nucifera OX=4432 GN=psbC PE=3 SV=1	19	9	16	9	473	51.8	7.21	47.56	170.3	169.4	171.6	61.7	59.2	60.1	67	67.8	66.2	106.7
A3FPF3	10 kDa chaperonin, mitochondrial OS=Nelumbo nucifera OX=4432 GN=HSP10 PE=2 SV=1	75	8	31	5	97	10.4	7.42	79.38	93.8	87.1	92.9	105.3	101.6	102.3	106.8	105.9	105	99.3
A0A1U8AIP2	enolase 1, chloroplastic-like OS=Nelumbo nucifera OX=4432 GN=LOC104600649 PE=3 SV=1	30	13	24	5	494	53	7.75	53.65	132.4	126.8	128.7	86.1	86	89.8	79.6	84	81.3	105.4
A0A1U7ZHN7	splicing factor 3B subunit 3-like isoform X1 OS=Nelumbo nucifera OX=4432 GN=LOC104594657 PE=4 SV=1	13	14	17	6	1214	134.8	5.47	37.93	106.6	104.7	107.1	101.6	95.1	95.3	97.3	95.5	92.2	104.6
A0A1U7ZG86	Superoxide dismutase [Cu-Zn] OS=Nelumbo nucifera OX=4432 GN=LOC104590242 PE=3 SV=1	45	7	33	2	152	15.5	5.88	75.71	108.6	111.7	111.4	98.9	98.7	98.5	90.2	89.5	90	102.4
A0A1U7ZCG7	60S ribosomal protein L13a-4-like OS=Nelumbo nucifera OX=4432 GN=LOC104589091 PE=3 SV=1	50	12	40	3	206	23.5	10.59	105.52	104.2	105.2	104.1	99.1	98	98.2	97.1	99.7	96.2	98
A0A1U8AQN2	40S ribosomal protein S18 OS=Nelumbo nucifera OX=4432 GN=LOC104605497 PE=3 SV=1	43	8	22	1	152	17.6	10.64	51.1	101.9	104.5	90.2	110.5	100	106.9	95.3	76.1	120.8	93.9
A0A1U8AGB0	asparagine synthetase [glutamine-hydrolyzing] 2 OS=Nelumbo nucifera OX=4432 GN=LOC104604125 PE=4 SV=1	23	11	21	10	590	66.3	6.54	48.99	113.2	113.1	110.5	100	95.9	96.9	89.9	85.4	87.8	107.3
A0A1U7YQR7	carotenoid 9,10(9',10')-cleavage dioxygenase 1-like OS=Nelumbo nucifera OX=4432 GN=LOC104585915 PE=3 SV=1	23	11	19	10	535	60.2	6.06	36.48	106.2	108.2	105.3	93.9	94.8	92.3	97.9	100.2	102.2	98.9
A0A1U8ASZ9	uncharacterized protein OsI_027940 OS=Nelumbo nucifera OX=4432 GN=LOC104606164 PE=4 SV=1	47	8	16	5	177	19.9	4.59	40.41	118.1	112.8	116.2	92.4	94.9	92.6	90.2	91.2	92.1	99.4
A0A1U7Z8V0	protein TPLATE-like OS=Nelumbo nucifera OX=4432 GN=LOC104591659 PE=4 SV=1	19	18	19	18	1159	128.8	6.06	33.35	111.3	114.3	112.8	98.1	94.8	92.5	89.6	92.9	89.9	103.8
A0A1U8AK63	protein CutA, chloroplastic isoform X1 OS=Nelumbo nucifera OX=4432 GN=LOC104603874 PE=4 SV=1	35	7	16	6	193	21.2	8.78	45.73	89.9	87.5	91.2	98.6	98.6	101.8	115	109.4	106.3	101.8
A0A1U7ZAP2	proteasome activator subunit 4 OS=Nelumbo nucifera OX=4432 GN=LOC104588552 PE=4 SV=1	8	12	17	12	1813	203.9	7.11	36.83	97.1	101.6	95.4	100.6	101.3	99.6	100.3	98.5	103.5	102.2
A0A1U8AA34	CCR4-NOT transcription complex subunit 1 isoform X1 OS=Nelumbo nucifera OX=4432 GN=LOC104598503 PE=4 SV=1	8	18	19	18	2454	271.5	5.97	38.99	117.6	118.1	115.6	93.4	93.3	90.1	86.6	89.9	91.2	104.1
A0A1U8AU93	signal recognition particle 54 kDa protein, chloroplastic-like OS=Nelumbo nucifera OX=4432 GN=LOC104607660 PE=3 SV=1	25	14	18	4	569	62.4	9.36	36.75	114.3	111.5	111.1	95.2	95.7	96.8	90.6	92.9	90.1	101.7
A0A1U8AA70	putative RNA-binding protein Luc7-like 2 isoform X1 OS=Nelumbo nucifera OX=4432 GN=LOC104598238 PE=4 SV=1	30	14	16	14	425	49.9	8.48	40.05	95	98	94.6	103	107.6	99.4	97.7	99.5	103.6	101.7
A0A1U8Q488	mitotic checkpoint protein BUB3.3-like OS=Nelumbo nucifera OX=4432 GN=LOC104598192 PE=4 SV=1	14	10	37	3	609	67.4	6.18	68.03	104	102.9	102.9	95.4	97.5	93	101.4	100.5	103.2	99.4
A0A1U7Z8G5	developmentally-regulated G-protein 3 OS=Nelumbo nucifera OX=4432 GN=LOC104587421 PE=4 SV=1	31	10	13	10	368	41.2	8.43	35.05	115.5	117.3	114	92.5	97.9	93.4	87.2	86	91.6	104.7
A0A1U7ZGW0	subtilisin-like protease SBT1.6 OS=Nelumbo nucifera OX=4432 GN=LOC104590022 PE=4 SV=1	21	12	16	10	776	81.9	8.75	40.26	111.5	112.5	110.5	97.9	99.4	100.9	87.1	88	88.5	103.7
A0A1U8AE73	isopentenyl-diphosphate Delta-isomerase I OS=Nelumbo nucifera OX=4432 GN=LOC104599644 PE=4 SV=1	32	10	18	10	329	37	6.28	37.95	121	118.4	118	93.2	93.8	94.4	88	86.4	86.8	100.1
A0A1U7YVP7	monothiol glutaredoxin-S17 OS=Nelumbo nucifera OX=4432 GN=LOC104586421 PE=4 SV=1	27	10	17	9	495	54.2	5.17	44.62	99.1	98.6	95.7	105.4	104.2	102.7	99.1	97.9	98.1	99.3
A0A1U7ZNL1	Protein-lysine N-methyltransferase LOC104594641 OS=Nelumbo nucifera OX=4432 GN=LOC104594641 PE=3 SV=1	39	11	14	3	335	36.7	4.63	37.45	109.8	108	112.6	95	94.9	93.1	95.5	96.1	93.9	101.3
A0A1U7Z8N2	60S ribosomal protein L21-2 OS=Nelumbo nucifera OX=4432 GN=LOC104587488 PE=4 SV=1	49	8	20	3	164	18.7	10.27	61.7	104.1	106.7	106.6	97.3	93.3	94.1	100.8	99.4	99.3	98.3
A0A1U7Z5U0	protein FLX-like 3 OS=Nelumbo nucifera OX=4432 GN=LOC104586611 PE=4 SV=1	35	10	20	10	276	31	7.03	50	111.8	108.9	111.1	94.6	96.7	95.8	92.6	92.9	94.7	100.9
A0A1U8A5A9	diaminopimelate epimerase, chloroplastic OS=Nelumbo nucifera OX=4432 GN=LOC104599281 PE=3 SV=1	23	7	17	7	358	39.1	6.84	36.52	119.6	124.8	118.4	96.8	85.7	89.5	86.7	90	87.1	101.3
A0A1U7YXT6	ubiquitin domain-containing protein DSK2a-like isoform X1 OS=Nelumbo nucifera OX=4432 GN=LOC104587120 PE=4 SV=1	28	11	17	6	559	59	4.86	36.17	111.4	105	103	97.7	103.5	96.3	92.7	98.1	91	101.4
A0A1U8BCY1	probable aldo-keto reductase 1 OS=Nelumbo nucifera OX=4432 GN=LOC104613225 PE=4 SV=1	34	12	18	12	349	38.7	5.99	39.74	118	115.1	116.6	92.6	93.4	93.2	90.2	89.8	88	103
A0A1U7ZQM1	uncharacterized protein LOC104596335 isoform X1 OS=Nelumbo nucifera OX=4432 GN=LOC104596335 PE=3 SV=1	14	14	19	14	1057	118.3	6.05	45.82	105.8	105.4	103.8	94.1	95.7	93.5	100.1	99.2	100.9	101.5
A0A1U7ZNP8	Dolichyl-diphosphooligosaccharide--protein glycosyltransferase 48 kDa subunit OS=Nelumbo nucifera OX=4432 GN=LOC104595766 PE=3 SV=1	23	9	14	9	433	48.5	6.21	36.26	111.6	111.7	110.6	94.2	96.5	93.5	92.9	95.8	92.8	100.4
A0A1U8AA35	10 kDa chaperonin-like OS=Nelumbo nucifera OX=4432 GN=LOC104600655 PE=3 SV=1	72	9	33	6	97	10.5	8.4	84.32	104.3	103.3	104.7	100.8	98.8	101.4	96.7	94.6	96.1	99.2
A0A1U7ZZL2	protein SLOW GREEN 1, chloroplastic-like OS=Nelumbo nucifera OX=4432 GN=LOC104599263 PE=4 SV=1	30	10	16	10	346	39.7	8.19	34.82	101.3	106	99.8	97.9	100.3	98.1	97	99.7	96.8	103
A0A1U7ZEM4	2-methylene-furan-3-one reductase-like isoform X1 OS=Nelumbo nucifera OX=4432 GN=LOC104593206 PE=4 SV=1	33	11	16	11	398	42.1	8.73	36.33	111.7	111.7	116.2	95.5	91.5	93.9	88.6	93	94.9	103.1
A0A1U8B291	Peptidyl-prolyl cis-trans isomerase OS=Nelumbo nucifera OX=4432 GN=LOC104610056 PE=3 SV=1	40	7	21	6	174	18.9	8.07	48.9	103	101.8	101.8	97.3	97.3	100.9	100.3	102.6	96.4	98.6
A0A1U8BEL4	Poly [ADP-ribose] polymerase OS=Nelumbo nucifera OX=4432 GN=LOC104610063 PE=4 SV=1	17	16	20	16	987	111.5	8.65	35.63	104.7	107.5	102.8	93.5	98.5	96.8	98.9	98.4	98.4	100.4
A0A1U8ADH8	30S ribosomal protein S5, chloroplastic OS=Nelumbo nucifera OX=4432 GN=LOC104599426 PE=3 SV=1	27	10	20	10	319	34.4	9.47	53.49	102.5	100.2	104.1	98	101	102.7	94.7	98.9	98	99.8
A0A1U8ADM2	D-amino-acid transaminase, chloroplastic-like isoform X1 OS=Nelumbo nucifera OX=4432 GN=LOC104599458 PE=4 SV=1	27	10	35	10	352	38.5	6.19	52.76	51.4	55.4	51.6	113.3	117.6	111.8	134	133.9	137	94
A0A1U8AA95	Protein ROOT HAIR DEFECTIVE 3 homolog OS=Nelumbo nucifera OX=4432 GN=LOC104600718 PE=3 SV=1	20	13	17	6	816	90.2	5.63	33.05	116.1	126.1	114.2	95.6	92.8	89.9	77.7	80.2	94.9	112.4
A0A1U8AQN5	FRIGIDA-like protein OS=Nelumbo nucifera OX=4432 GN=LOC104606586 PE=3 SV=1	23	16	19	16	519	56.9	9.35	43.92	107.9	108.7	108	98.3	97.7	96.5	93.3	93.3	95.5	100.9
A0A1U8BAI8	40S ribosomal protein S13 OS=Nelumbo nucifera OX=4432 GN=LOC104611406 PE=3 SV=1	52	8	31	1	151	17.2	10.45	86.4	106.7	93.7	100.3	102.3	102.9	98.9	105.5	101.9	101.1	86.6
A0A1U8AH73	late embryogenesis abundant protein Lea14-A OS=Nelumbo nucifera OX=4432 GN=LOC104600237 PE=4 SV=1	31	5	24	5	151	16.4	5.58	77.98	60.5	58.6	63	118	112.8	114	127.7	130.6	123.5	91.4
A0A1U8AJL3	Tryptophan synthase OS=Nelumbo nucifera OX=4432 GN=LOC104600965 PE=3 SV=1	28	12	22	12	463	50.5	6.77	46.08	117.4	117	114	95.5	96.9	93.5	84.9	87.2	88.6	105
A0A1U8BD95	60S ribosomal protein L26-1-like OS=Nelumbo nucifera OX=4432 GN=LOC104613310 PE=3 SV=1	39	8	27	5	152	17.1	10.7	62.49	102	102.2	99.7	97.6	97.4	94.1	102.1	105.1	101.4	98.5
A0A1U8BAW3	uncharacterized protein LOC104612653 OS=Nelumbo nucifera OX=4432 GN=LOC104612653 PE=4 SV=1	13	10	15	10	952	108.7	6.67	36.01	114	119.6	116	93.9	98.1	96.6	83.9	85.4	87.3	105.2
A0A1U7ZKP6	NADH dehydrogenase [ubiquinone] flavoprotein 1, mitochondrial OS=Nelumbo nucifera OX=4432 GN=LOC104591674 PE=3 SV=1	36	14	15	10	487	53.8	8.22	27.98	100.7	101.3	101.2	97.2	94.3	99.1	105.9	104	97	99.3
A0A1U7Z359	Glutathione reductase OS=Nelumbo nucifera OX=4432 GN=LOC104585819 PE=3 SV=1	36	14	20	14	496	53.5	6.86	42.82	105.9	106.3	109.6	96.9	98	100.3	96.2	96.4	93.1	97.3
A0A1U7ZGN9	Peptidyl-prolyl cis-trans isomerase OS=Nelumbo nucifera OX=4432 GN=LOC104592828 PE=3 SV=1	36	9	21	8	261	28.1	9.26	49.23	91.9	95.2	97.4	101.9	103.6	106.8	100.2	103	99.9	100.1
A0A1U7ZJI4	magnesium-protoporphyrin IX monomethyl ester [oxidative] cyclase, chloroplastic OS=Nelumbo nucifera OX=4432 GN=LOC104593560 PE=3 SV=1	31	11	17	11	399	46.4	8.97	44.53	134.8	133.6	136.5	83.7	83.8	82.8	81.8	76.8	81.4	104.8
A0A1U7Z622	stem-specific protein TSJT1-like OS=Nelumbo nucifera OX=4432 GN=LOC104587155 PE=4 SV=1	34	8	18	8	257	28.3	6.23	57.01	60.6	64.5	61.9	113.9	116.7	113.7	122.4	126.9	124.6	94.8
A0A1U8ABM6	glyoxysomal fatty acid beta-oxidation multifunctional protein MFP-a OS=Nelumbo nucifera OX=4432 GN=LOC104598910 PE=3 SV=1	19	16	18	16	725	78.9	8.82	43.76	127.5	126.2	128.3	92.1	84.8	90.1	78.8	87.2	80.6	104.4
A0A1U8BF71	2-alkenal reductase (NADP(+)-dependent)-like OS=Nelumbo nucifera OX=4432 GN=LOC104612785 PE=4 SV=1	28	10	19	10	358	39.8	5.6	39.09	112.8	110	115.8	95.4	94.3	92.9	93	92.8	92.5	100.5
A0A1U7ZSV7	60S ribosomal protein L6 OS=Nelumbo nucifera OX=4432 GN=LOC104597510 PE=3 SV=1	30	9	24	3	233	26.1	10.05	52.6	107.5	106	106.9	95.3	93	95.1	103.6	96.6	96.1	100
A0A1U8AKI6	endochitinase PR4-like OS=Nelumbo nucifera OX=4432 GN=LOC104605246 PE=4 SV=1	23	4	12	4	271	28.8	4.63	31.39	91.1	93.9	92.2	81.1	82.4	88.6	124.7	121.8	123.4	100.9
A0A1U8AIU7	Aldose 1-epimerase OS=Nelumbo nucifera OX=4432 GN=LOC104603444 PE=3 SV=1	33	9	14	7	339	37	6.04	39.23	105.6	105.9	107.3	103	105.3	101	90.2	90.7	88.4	102.6
A0A1U8AIE3	ubiquitin carboxyl-terminal hydrolase 6 OS=Nelumbo nucifera OX=4432 GN=LOC104600779 PE=3 SV=1	24	9	13	9	479	54.1	6.34	37.05	100.7	96.8	103.9	104.9	101.1	107.2	96.4	94.3	96.1	98.6
A0A1U7ZB25	Cysteine proteinase inhibitor OS=Nelumbo nucifera OX=4432 GN=LOC104588274 PE=3 SV=1	40	9	20	5	239	26.9	7.06	54.3	93.7	90.5	90.1	104.1	100.5	102.7	111.8	109.4	100.9	96.2
A0A1U7ZBZ1	28 kDa ribonucleoprotein, chloroplastic-like OS=Nelumbo nucifera OX=4432 GN=LOC104591544 PE=4 SV=1	26	8	27	5	330	36.6	4.6	46.99	107.9	108	105	93.4	97.1	96.9	100	97.4	94.5	99.6
A0A1U8Q3P2	Carboxypeptidase OS=Nelumbo nucifera OX=4432 GN=LOC104602857 PE=3 SV=1	21	8	15	5	476	52.9	8.16	36.73	101.8	101.1	102.7	95.7	91.2	92.9	98.7	103.3	112.4	100.3
A0A1U8AR64	Chlorophyll a-b binding protein, chloroplastic OS=Nelumbo nucifera OX=4432 GN=LOC104606593 PE=3 SV=1	25	5	24	3	264	28.4	5.96	58.49	124.3	120.8	126.4	82.7	83.1	84.8	94.8	91	92.9	99.3
A0A1U7ZVN1	Non-specific lipid-transfer protein OS=Nelumbo nucifera OX=4432 GN=LOC104594498 PE=3 SV=1	55	6	69	6	119	11.9	8.72	176.81	77.4	78	78.1	104	104.2	103.2	118.3	116.8	122.5	97.5
A0A1U7ZW40	Histone H2B OS=Nelumbo nucifera OX=4432 GN=LOC104594615 PE=3 SV=1	59	10	30	1	152	16.8	10.05	70.31	121.5	121.2	123.7	88.9	82.1	86.7	91.3	96.8	89.7	98
A0A1U8AB77	Proteasome subunit beta OS=Nelumbo nucifera OX=4432 GN=LOC104602146 PE=3 SV=1	43	10	16	1	233	25.1	5.08	44.51
A0A1U7YZM8	far upstream element-binding protein 2-like isoform X1 OS=Nelumbo nucifera OX=4432 GN=LOC104589485 PE=4 SV=1	17	9	15	1	780	81.6	4.97	33.89	115.5	96.8	103.3	103.5	91.4	113.1	87.4	95.1	95	99
A0A1U7ZA15	probable voltage-gated potassium channel subunit beta OS=Nelumbo nucifera OX=4432 GN=LOC104587906 PE=4 SV=1	34	10	19	10	328	36.7	6.87	43.64	98.9	97.7	99.5	99.1	104	102.9	97.4	100.3	99.4	101
A0A1U7ZS44	uncharacterized protein LOC104595702 isoform X1 OS=Nelumbo nucifera OX=4432 GN=LOC104595702 PE=4 SV=1	28	5	12	1	176	19.5	9.33	30.6	104.8	106.7	104	109.4	99.2	104	88.9	88.4	89.1	105.4
A0A1U7ZRM3	proteasome subunit beta type-2-B OS=Nelumbo nucifera OX=4432 GN=LOC104596581 PE=4 SV=1	53	11	24	3	207	22.8	6.54	49.24	105.6	102.8	102.9	101	101.4	101.3	94.2	95.9	94.8	100.1
A0A1U8AKM5	probable NAD(P)H dehydrogenase (Quinone) FQR1-like 1 OS=Nelumbo nucifera OX=4432 GN=LOC104604972 PE=4 SV=1	41	9	16	1	204	21.7	7.55	34.53	83	80	81.5	107.9	107.6	109.2	114.1	111.3	107.4	98
A0A1U8A9T3	eukaryotic translation initiation factor 5B-like OS=Nelumbo nucifera OX=4432 GN=LOC104601736 PE=4 SV=1	10	10	16	10	1447	159.3	5.43	26.76	123.2	125	125	94.2	90.9	87.9	79.8	84.3	86.7	103.1
A0A1U7ZY18	ATP-dependent Clp protease proteolytic subunit OS=Nelumbo nucifera OX=4432 GN=LOC104598392 PE=3 SV=1	30	8	13	8	306	33.5	9.07	40.41	91.9	94.4	92.8	103.1	105	102.1	102.4	104.3	103	100.9
A0A1U8AMJ2	Histone H2B OS=Nelumbo nucifera OX=4432 GN=LOC104604581 PE=3 SV=1	60	11	31	4	148	16.3	10.02	79.73	104.6	99.2	93	98	103.7	103.3	97.6	97	102.5	100.9
A0A1U7ZNL3	uncharacterized protein LOC104592159 OS=Nelumbo nucifera OX=4432 GN=LOC104592159 PE=4 SV=1	29	12	16	12	400	45.4	6.73	32.87	110.6	112.5	111.8	97.8	96.8	91.9	91.1	93.1	94	100.4
A0A1U7ZRX0	ras-related protein RABB1b isoform X2 OS=Nelumbo nucifera OX=4432 GN=LOC104593038 PE=4 SV=1	55	10	15	5	211	23.4	7.81	37.71	101.7	104.6	98	95	102.7	103.8	95.7	92.4	102.5	103.5
A0A024AXY4	Glucose-1-phosphate adenylyltransferase OS=Nelumbo nucifera OX=4432 GN=AGPL1 PE=2 SV=1	25	11	15	11	528	58.7	8.48	41.19	136	137.5	135.2	86.9	88.4	90.8	71	73.9	75.3	105.1
A0A1U7ZZC9	Signal recognition particle 54 kDa protein OS=Nelumbo nucifera OX=4432 GN=LOC104599194 PE=3 SV=1	27	11	14	11	495	55.1	9.26	33.47	107	106.2	106.6	96.2	102.1	97	92.3	97.8	94.4	100.3
A0A1U7ZI28	probable tocopherol O-methyltransferase, chloroplastic OS=Nelumbo nucifera OX=4432 GN=LOC104590834 PE=3 SV=1	34	9	18	9	297	33.3	5.99	49.5	147.9	145.2	149.4	71.2	72.6	69.4	80.4	79.3	81	103.5
A0A1U8AN22	40S ribosomal protein S13-like OS=Nelumbo nucifera OX=4432 GN=LOC104602244 PE=3 SV=1	52	8	31	1	151	17.1	10.45	88.38	100.2	100.3	101	99.6	95.2	99.1	104.8	100.8	100.7	98.2
A0A1U8B5N6	brefeldin A-inhibited guanine nucleotide-exchange protein 2-like OS=Nelumbo nucifera OX=4432 GN=LOC104611051 PE=4 SV=1	9	15	17	6	1780	198.6	5.41	33.35	121.8	124.6	123.9	94.2	92.2	87.8	84.4	80.9	85.7	104.4
A0A1U7ZGF1	vacuolar-sorting receptor 1-like OS=Nelumbo nucifera OX=4432 GN=LOC104593761 PE=4 SV=1	30	15	21	9	624	69.4	5.92	43.4	104.5	104.5	99.1	97.8	96.2	95.4	102	97.3	102.5	100.7
A0A1U7Z756	Ribosomal protein OS=Nelumbo nucifera OX=4432 GN=LOC104589952 PE=3 SV=1	33	12	20	12	355	38.4	9.45	46.27	105.9	104.6	105.5	95.3	97.1	96.9	96.1	96.2	97.6	104.6
A0A1U8AWZ9	mitochondrial outer membrane protein porin 2-like OS=Nelumbo nucifera OX=4432 GN=LOC104608308 PE=4 SV=1	47	12	18	7	276	29.7	9.19	31.61	99.2	95.4	96.9	103.1	100.2	102.9	104	105.5	97.1	95.7
A0A1U7ZAN2	Translocon-associated protein subunit beta OS=Nelumbo nucifera OX=4432 GN=LOC104592784 PE=3 SV=1	26	3	8	3	193	21	9.88	33.56	116.3	121.8	119.1	94	92.1	89.2	88.6	89.1	85.1	104.6
A0A1U7ZJH1	peptidyl-prolyl cis-trans isomerase, chloroplastic OS=Nelumbo nucifera OX=4432 GN=LOC104590866 PE=4 SV=1	32	11	18	11	443	48.9	5.35	45.56	99.2	94.5	98.3	102.7	101.7	105	100.3	96.4	100.9	101.1
A0A1U8A5E5	THO complex subunit 4A OS=Nelumbo nucifera OX=4432 GN=LOC104599317 PE=4 SV=1	52	10	16	4	244	26.1	9.98	43.67	102.8	109.9	103.1	93.3	98.2	103.4	94.3	96.8	96.9	101.3
A0A1U7ZD79	Alpha-mannosidase OS=Nelumbo nucifera OX=4432 GN=LOC104591859 PE=3 SV=1	12	12	15	10	1017	114.5	5.86	38.44	96.1	97.7	95.1	99.5	101.6	99.5	102	103.8	103	101.7
A0A1U7ZA30	60S ribosomal protein L10-like OS=Nelumbo nucifera OX=4432 GN=LOC104588378 PE=4 SV=1	41	10	23	3	220	24.9	10.36	55.21	102.7	99.1	102.7	97.1	96.8	95.5	103.7	100.1	101.7	100.5
A0A1U8AWG1	transportin-1-like OS=Nelumbo nucifera OX=4432 GN=LOC104608273 PE=4 SV=1	16	12	14	7	889	99.3	5.03	25.62	105.6	107.3	107.5	101.4	100.9	104	88.2	96.6	88.1	100.4
A0A1U7ZSQ6	Clathrin light chain OS=Nelumbo nucifera OX=4432 GN=LOC104596948 PE=3 SV=1	38	9	20	9	305	33.8	5.78	39.62	111	109.3	117.4	94.3	94.6	95.4	92.4	93.7	90.4	101.5
A0A1U8A422	4-alpha-glucanotransferase OS=Nelumbo nucifera OX=4432 GN=LOC104600019 PE=3 SV=1	17	8	14	7	605	68.5	6.25	29.54	97.9	95.9	94.3	99.1	102	102.5	106.6	103.6	102.4	95.6
A0A1U8ADS7	isocitrate dehydrogenase [NAD] regulatory subunit 1, mitochondrial-like OS=Nelumbo nucifera OX=4432 GN=LOC104599192 PE=4 SV=1	26	8	15	2	380	41.1	6.86	31.8	106.5	109.9	100.5	93.9	101	90	99.2	94.1	104.9	100
A0A1U7ZAR0	ras-related protein Rab7 OS=Nelumbo nucifera OX=4432 GN=LOC104592195 PE=4 SV=1	60	10	17	5	207	23.2	5.33	38.75	99.9	99.6	95.8	99.7	105.9	104.1	101.1	98.8	94.3	100.8
A0A1U8AF44	temperature-induced lipocalin-1-like OS=Nelumbo nucifera OX=4432 GN=LOC104603340 PE=3 SV=1	42	7	18	7	178	20.4	5.6	54.16	58.3	57.5	60.3	117.8	114.2	114.1	136.2	127.5	121.9	92.3
A0A1U8B974	pre-mRNA-processing factor 19-like OS=Nelumbo nucifera OX=4432 GN=LOC104611002 PE=4 SV=1	25	12	20	12	522	56.7	6.9	52.77	105.2	102.8	104.3	101	97.3	100.3	94.1	96	97.2	101.8
A0A1U7ZBS3	nuclear pore complex protein GP210 OS=Nelumbo nucifera OX=4432 GN=LOC104591486 PE=4 SV=1	8	13	15	13	1953	213.7	5.67	34.88	101.8	100.7	102.6	106.3	111.3	107.1	91.4	88.3	88.2	102.3
A0A1U8BAI2	membrane steroid-binding protein 1 OS=Nelumbo nucifera OX=4432 GN=LOC104608748 PE=3 SV=1	53	8	19	7	224	24.8	4.75	36.06	113.2	114.2	115.4	96.8	98.4	96.7	86.7	89.2	87.5	102
A0A1U8BAK7	UDP-D-apiose/UDP-D-xylose synthase 2-like OS=Nelumbo nucifera OX=4432 GN=LOC104612528 PE=4 SV=1	40	14	21	7	389	43.6	5.91	45.87	111.3	113.7	113.2	93.7	92.5	93.2	90.4	95	94.5	102.6
A0A1U8AJU6	importin subunit beta-1-like OS=Nelumbo nucifera OX=4432 GN=LOC104604740 PE=4 SV=1	12	10	19	5	872	96.7	4.7	37.53	103.1	100.7	100	102.9	97.8	105.9	96.6	92.4	96.3	104.3
A0A1U7YXQ6	U2 snRNP auxiliary factor large subunit OS=Nelumbo nucifera OX=4432 GN=LOC104588172 PE=3 SV=1	12	6	9	2	563	62.8	7.68	27.99	115.7	111.5	114.8	103.7	91.1	98.4	86.8	92.3	90.4	95.3
A0A1U8AV45	subtilisin-like protease SBT1.6 OS=Nelumbo nucifera OX=4432 GN=LOC104604236 PE=4 SV=1	17	10	16	8	779	82.2	8.65	40.54	95.5	95.6	98.2	95.8	94	94.7	112.3	106.9	109.3	97.6
A0A1U8BCF2	ubiquitin-conjugating enzyme E2 36 OS=Nelumbo nucifera OX=4432 GN=LOC104613113 PE=3 SV=1	59	7	15	2	153	17.2	7.34	34.07	115.8	113.8	115.6	91.9	92.3	91.3	94.6	92.8	91.7	100.1
A0A1U7Z224	far upstream element-binding protein 2-like isoform X2 OS=Nelumbo nucifera OX=4432 GN=LOC104589485 PE=4 SV=1	17	9	14	1	779	81.5	4.97	34.37	100.2	100.1	100.7	104.4	102.8	99.4	97.9	100.1	95.2	99.1
A0A1U8BIS7	uncharacterized protein LOC104611315 OS=Nelumbo nucifera OX=4432 GN=LOC104611315 PE=3 SV=1	14	16	20	16	1112	125.7	5.88	41.72	96.3	96	96.7	102.4	104.4	103.4	98.4	104.1	101.4	96.8
A0A1U8AQG2	heterogeneous nuclear ribonucleoprotein 1-like OS=Nelumbo nucifera OX=4432 GN=LOC104602803 PE=4 SV=1	26	9	21	5	467	47.3	8.46	47.9	110.3	112.2	110.4	97.2	96.9	98.2	87.4	93.1	93.2	101.2
A0A1U7Z214	Peptidylprolyl isomerase OS=Nelumbo nucifera OX=4432 GN=LOC104590252 PE=4 SV=1	43	6	14	6	159	17.1	8.25	29.91	104.8	102.7	104.2	102.2	103.3	101.1	91.2	91.6	99.2	99.8
A0A1U8BGP1	temperature-induced lipocalin-1 OS=Nelumbo nucifera OX=4432 GN=LOC104610692 PE=3 SV=1	38	8	21	8	184	21.4	8.05	49.39	85.3	80.7	81.8	109.3	107.1	111.6	107.3	110	108.8	98
A0A1U7ZCI0	probable aspartyl aminopeptidase isoform X1 OS=Nelumbo nucifera OX=4432 GN=LOC104591665 PE=3 SV=1	30	14	17	14	490	53.7	6.8	36.59	103.1	107.1	99.8	97.1	104.2	102	101.4	91.3	97.1	97
A0A1U8B7N1	glutathione S-transferase F10-like OS=Nelumbo nucifera OX=4432 GN=LOC104608091 PE=3 SV=1	44	8	26	7	211	24.4	6.02	65.57	122	121.8	123.8	89.5	91.9	89.5	88.4	87.3	82.9	102.9
A0A1U8B1C8	heterogeneous nuclear ribonucleoprotein R-like isoform X1 OS=Nelumbo nucifera OX=4432 GN=LOC104609827 PE=4 SV=1	19	13	15	10	785	86.9	5.2	36	103.6	103.4	102.1	88.3	89	94.5	104.7	106.4	107.4	100.5
A0A1U7ZPR3	nuclear pore complex protein NUP205 OS=Nelumbo nucifera OX=4432 GN=LOC104592427 PE=4 SV=1	10	17	17	17	1883	213.1	5.85	36.08	111.9	114.4	113.1	92.1	98.4	95.9	84.9	93.2	92.1	103.9
A0A1U7YSH8	lanC-like protein GCL2 isoform X3 OS=Nelumbo nucifera OX=4432 GN=LOC104586449 PE=4 SV=1	24	7	14	7	408	44.6	6.61	34.71	83.5	82.4	80.3	111.1	112.1	112.6	105.7	107.8	108.3	96.3
A0A1U7ZDL0	glucosidase 2 subunit beta-like isoform X1 OS=Nelumbo nucifera OX=4432 GN=LOC104589013 PE=4 SV=1	20	12	16	11	627	71.3	4.93	36.64	110	108.9	109.1	94	96.2	92.1	94.6	94.9	95	105.2
A0A1U7YTP5	protein CDI-like OS=Nelumbo nucifera OX=4432 GN=LOC104586847 PE=4 SV=1	39	10	23	7	295	33.9	5.9	61.14	165	159.6	163.9	67.6	67.7	69.7	66.7	67.6	65.6	106.5
A0A1U7ZAX7	selenium-binding protein 1-like OS=Nelumbo nucifera OX=4432 GN=LOC104591214 PE=4 SV=1	37	6	13	6	218	24.9	6.42	35.4	116.2	109.2	114.2	99.1	101.5	93.7	85.8	89.7	88.9	101.8
A0A1U7ZLT0	uncharacterized protein DDB_G0283697 OS=Nelumbo nucifera OX=4432 GN=LOC104595253 PE=4 SV=1	36	10	17	10	317	34.3	5.26	38.2	84.1	84.4	83.6	99	105.7	104.3	115.2	113.6	107.4	102.5
A0A1U7ZSH4	non-symbiotic hemoglobin 1 isoform X1 OS=Nelumbo nucifera OX=4432 GN=LOC104595799 PE=3 SV=1	36	9	21	9	239	26.5	9.23	49	127	124	126.4	85.3	86.8	85.1	85.9	89	87.6	102.9
A0A1U8AGU3	probable aquaporin PIP2-8 OS=Nelumbo nucifera OX=4432 GN=LOC104604275 PE=3 SV=1	20	5	13	5	280	29.8	9.13	33.12	70.4	71.7	72.2	113.1	118.9	111.7	115.4	114.5	113.5	98.8
A0A1U8A4Q9	exocyst complex component SEC10-like OS=Nelumbo nucifera OX=4432 GN=LOC104600227 PE=4 SV=1	18	14	16	13	840	92	5.36	34.99	120.9	120.9	121	88.7	91	92.8	87	86.3	89.4	102
A0A1U8AKL3	dynamin-related protein 5A OS=Nelumbo nucifera OX=4432 GN=LOC104604017 PE=3 SV=1	24	11	14	11	609	68.4	7.84	30.9	112.2	110.5	107.2	88.4	94.2	95.4	88.1	86.3	92.3	125.4
A0A1U8B355	cell division protein FtsZ homolog 1, chloroplastic-like OS=Nelumbo nucifera OX=4432 GN=LOC104606542 PE=3 SV=1	32	12	15	11	503	53	9.26	30.18	119.7	120.8	118	91.5	94.2	90.9	86.1	87.3	90	101.4
A0A1U8B6B2	ATP-citrate synthase alpha chain protein 3 OS=Nelumbo nucifera OX=4432 GN=LOC104611252 PE=4 SV=1	30	9	16	5	423	46.5	5.47	33.05	111.1	112.2	111.6	97.3	98.1	90	87.6	93.5	94	104.6
A0A1U8AUZ7	far upstream element-binding protein 1-like OS=Nelumbo nucifera OX=4432 GN=LOC104604413 PE=4 SV=1	17	11	20	6	740	77.4	6.38	50.95	116.5	109.7	112.7	87.1	101	97	89	90.7	91.7	104.6
A0A1U7Z7N8	aquaporin TIP3-1-like OS=Nelumbo nucifera OX=4432 GN=LOC104591324 PE=3 SV=1	7	2	17	2	259	26.8	7.33	75.91	76.4	86.5	78.1	113	108.7	108	110.4	111.8	107.1	100
A0A1U7Z4V8	stearoyl-[acyl-carrier-protein] 9-desaturase 6, chloroplastic OS=Nelumbo nucifera OX=4432 GN=LOC104589269 PE=4 SV=1	29	10	16	9	392	44.4	6.64	34.91	172.7	185.1	167.1	65.2	62.5	62	53	60	67.2	105.3
A0A1U8AGR3	synaptotagmin-2-like OS=Nelumbo nucifera OX=4432 GN=LOC104604246 PE=4 SV=1	25	11	18	11	538	61.5	7.59	35.97	94.3	93.2	95.4	102.7	103.9	107	100.6	99.8	103.3	99.9
A0A1U8PZL2	uncharacterized protein LOC104590007 OS=Nelumbo nucifera OX=4432 GN=LOC104590007 PE=4 SV=1	77	8	25	8	94	10.4	5.27	59.54	49.2	50.8	49.3	125.7	128.3	126.8	122.9	124.3	127.7	95
A0A1U8B2M7	V-type proton ATPase subunit D-like OS=Nelumbo nucifera OX=4432 GN=LOC104609008 PE=4 SV=1	40	11	18	11	261	29.2	9.6	41.58	107.7	108.3	109.2	95.9	101.2	95.7	92.8	98.4	93.1	97.8
A0A1U7YV80	ras-related protein RABA5c OS=Nelumbo nucifera OX=4432 GN=LOC104586291 PE=4 SV=1	48	9	19	6	216	24	5.03	47.52	121.8	124.7	122.1	89.4	91	91	86.4	83.6	88.3	101.6
A0A1U8AFG0	alpha-1,4-glucan-protein synthase [UDP-forming] OS=Nelumbo nucifera OX=4432 GN=LOC104599697 PE=4 SV=1	36	12	20	7	351	40	5.95	44.12	109	111.3	105.7	97.5	95.3	99.5	95.5	91.5	90.8	103.9
A0A1U7Z692	SNF1-related protein kinase regulatory subunit gamma-1-like OS=Nelumbo nucifera OX=4432 GN=LOC104586752 PE=4 SV=1	20	7	13	5	444	48	6.21	37.67	102.6	96.9	103.3	105	104.5	104.7	98.2	98.9	87.6	98.4
A0A1U8AVF4	Plastocyanin OS=Nelumbo nucifera OX=4432 GN=LOC104604316 PE=3 SV=1	12	2	10	2	166	16.6	5.16	31.65	126.4	121.5	124.6	97.7	96	93.7	78.3	81	78	102.8
A0A1U8A5E9	heterogeneous nuclear ribonucleoprotein 1 OS=Nelumbo nucifera OX=4432 GN=LOC104600945 PE=4 SV=1	25	8	19	4	461	46.8	8.12	39.83	108.1	115.2	109	91.2	100.8	97.5	89.3	91.8	99.8	97.3
A0A1U7ZRK4	uncharacterized protein LOC104595565 OS=Nelumbo nucifera OX=4432 GN=LOC104595565 PE=4 SV=1	33	10	14	10	474	51.7	5.5	30.41	121.3	119.5	118.4	94.4	92.4	107.5	81.2	80.7	81.5	103.2
A0A1U8AGF7	heterogeneous nuclear ribonucleoprotein F isoform X1 OS=Nelumbo nucifera OX=4432 GN=LOC104603770 PE=4 SV=1	34	7	11	7	267	29.9	6.7	24.57	107	108.6	108.4	96.1	96.9	100	90.8	94.7	96.3	101.2
A0A1U7YTK5	2-alkenal reductase (NADP(+)-dependent)-like isoform X1 OS=Nelumbo nucifera OX=4432 GN=LOC104586807 PE=4 SV=1	24	10	24	5	311	34.8	6.25	54.35	109.3	112.2	109.1	91.9	89.2	93	98.2	99.5	94.3	103.4
A0A1U7ZQK0	Protein transport protein SEC23 OS=Nelumbo nucifera OX=4432 GN=LOC104596320 PE=3 SV=1	17	11	15	9	764	84.6	6.3	41.55	106	103.5	107.2	97.9	99.8	95.9	93.1	95	100.7	100.9
A0A1U7Z0R7	uncharacterized protein LOC104589845 OS=Nelumbo nucifera OX=4432 GN=LOC104589845 PE=4 SV=1	36	8	11	8	300	32.2	8.34	30.3	99.1	97.5	98.7	104	106.6	106.9	93	96.7	96.4	101
A0A1U7ZF27	2-Cys peroxiredoxin BAS1, chloroplastic-like OS=Nelumbo nucifera OX=4432 GN=LOC104589870 PE=4 SV=1	31	8	14	1	269	29.7	8.1	41.23	51.7	56.4	49.7	122.2	124.2	116.5	127.2	129	125	98.3
A0A1U7ZCF2	FRIGIDA-like protein OS=Nelumbo nucifera OX=4432 GN=LOC104592666 PE=3 SV=1	18	9	13	9	713	77.4	8.44	28.01	112	116.2	109.6	93.8	91.1	95.6	94	94.4	88.5	104.8
A0A1U8BAC8	ferredoxin-dependent glutamate synthase, chloroplastic OS=Nelumbo nucifera OX=4432 GN=LOC104611350 PE=4 SV=1	10	15	16	15	1631	177.9	6.48	38.24	117.4	118.6	113.8	95.9	96.9	91.1	92.3	89.9	79.2	104.8
A0A1U8AYV0	SH3 domain-containing protein 3 OS=Nelumbo nucifera OX=4432 GN=LOC104608956 PE=4 SV=1	40	15	19	14	348	38.9	8.12	38.63	113.1	111.5	110.7	91.1	95.5	97.9	90.1	93.7	91.5	105
A0A1U8BDU4	NPL4-like protein 1 OS=Nelumbo nucifera OX=4432 GN=LOC104613489 PE=4 SV=1	26	9	13	5	411	45.9	5.6	35.54	93.6	95.8	92.3	105.4	104.7	105.6	100.8	99.7	102	99.9
A0A1U7ZNZ6	interactor of constitutive active ROPs 3 isoform X1 OS=Nelumbo nucifera OX=4432 GN=LOC104594759 PE=4 SV=1	23	14	16	14	627	70.1	4.98	28.99	184.2	176.1	179.6	59.1	58.3	58.7	56.8	59.1	58.2	109.8
A0A1U8B6C2	60S ribosomal protein L17-2-like OS=Nelumbo nucifera OX=4432 GN=LOC104607767 PE=3 SV=1	47	9	27	9	181	20.6	10.26	62.57	102.8	97.2	104.4	97.5	96.5	95.1	101.2	103	102.1	100.3
A0A1U7YSW2	40S ribosomal protein S26 OS=Nelumbo nucifera OX=4432 GN=LOC104586585 PE=3 SV=1	37	6	22	6	125	14.4	11.05	47.18	104.1	103.6	106.5	92.7	92	95.2	106.5	99.4	100.2	99.7
A0A1U8BMA5	Elongation factor G, chloroplastic OS=Nelumbo nucifera OX=4432 GN=LOC104612651 PE=3 SV=1	21	13	16	13	776	85.5	5.87	29.93	92.9	101	93.5	105.4	99	101.1	93	97.3	113.7	103.3
A0A1U7Z9G8	mitochondrial phosphate carrier protein 3, mitochondrial OS=Nelumbo nucifera OX=4432 GN=LOC104591830 PE=3 SV=1	24	9	18	5	371	39.7	9.31	48.37	97.1	96.9	97	102.1	103.5	101.7	96	102.5	100.6	102.6
A0A1U8BNC5	60S ribosomal protein L24-like OS=Nelumbo nucifera OX=4432 GN=LOC104612724 PE=4 SV=1	29	6	23	2	164	18.6	10.78	73.14	105	103.6	99.1	88.9	91.3	89.6	104.4	112.1	108.2	97.7
A0A1U7YWN8	cell division protein FtsZ homolog 2-1, chloroplastic OS=Nelumbo nucifera OX=4432 GN=LOC104588597 PE=3 SV=1	21	7	7	5	483	50.9	6.73	25.44	109	108.9	109.7	95.3	94.9	95.4	89.8	98.2	94.3	104.5
A0A1U8B3X0	ras-related protein RHN1 OS=Nelumbo nucifera OX=4432 GN=LOC104606988 PE=4 SV=1	55	10	16	9	200	22	7.93	38.13	113.1	112.5	113	92.6	93.8	91.4	90.8	96.8	93.4	102.7
A0A1U7ZF00	protein transport protein Sec24-like At3g07100 OS=Nelumbo nucifera OX=4432 GN=LOC104589420 PE=4 SV=1	14	11	14	6	998	109.9	8.02	33.53	108.5	107.2	108.9	96.5	98.8	97.3	87.6	95.1	94.9	105.1
A0A1U7ZLJ5	COP9 signalosome complex subunit 4 OS=Nelumbo nucifera OX=4432 GN=LOC104595740 PE=4 SV=1	35	12	16	12	397	45.2	5.15	35.1	106.4	105.7	108.1	96	99.9	100.7	92.4	94.8	92.3	103.6
A0A1U8BII4	Glucose-6-phosphate 1-dehydrogenase OS=Nelumbo nucifera OX=4432 GN=LOC104611234 PE=3 SV=1	21	11	16	11	658	73.5	6.15	36.8	117.7	120.2	120.2	91.1	90.9	89	90.7	90.8	86.4	103
A0A1U7ZXS4	PTI1-like tyrosine-protein kinase 1 OS=Nelumbo nucifera OX=4432 GN=LOC104598306 PE=3 SV=1	19	8	14	1	508	56.7	8.24	35.47	95.7	95.6	98.8	105.4	106.8	96.2	92.4	100.2	108.2	100.8
A0A1U8AXW6	Eukaryotic translation initiation factor 2A OS=Nelumbo nucifera OX=4432 GN=LOC104605224 PE=3 SV=1	28	13	19	13	520	57	8.62	45.9	107.1	106.3	104.6	95.8	97.6	96.6	92	97.2	99.7	103.2
A0A1U8A1L8	Histone H2B OS=Nelumbo nucifera OX=4432 GN=LOC104599297 PE=3 SV=1	54	10	32	2	147	16.3	10.05	73.2	110.4	102	105.9	97.2	94.7	93.9	99.9	95.4	97.9	102.7
A0A1U8ABJ5	NADH dehydrogenase [ubiquinone] 1 alpha subcomplex subunit 9, mitochondrial OS=Nelumbo nucifera OX=4432 GN=LOC104602741 PE=4 SV=1	25	10	16	10	397	43.7	9.29	38.46	97.8	99.1	93.8	99.6	99.4	100	105.9	101.5	102.9	100
A0A1U8APQ6	malignant T-cell-amplified sequence 1 homolog OS=Nelumbo nucifera OX=4432 GN=LOC104606197 PE=4 SV=1	43	7	13	7	181	20.1	8.7	32.5	105.1	107	104.9	97	94.9	91.8	95.8	99.5	104.5	99.5
A0A1U7ZUG2	ATP synthase subunit O, mitochondrial-like OS=Nelumbo nucifera OX=4432 GN=LOC104597429 PE=3 SV=1	39	10	17	4	243	27	9.31	46.86	103.1	101.2	100.9	94.7	96.8	95.7	103.7	102.8	100.4	100.6
A0A1U8ASV3	extracellular ribonuclease LE-like OS=Nelumbo nucifera OX=4432 GN=LOC104606132 PE=3 SV=1	31	6	21	4	242	27.3	5.27	40.29	119.9	116.6	126.3	89.8	81.1	83.6	88.5	95.2	92.5	106.5
A0A1U7YU42	urease accessory protein G isoform X2 OS=Nelumbo nucifera OX=4432 GN=LOC104585941 PE=3 SV=1	40	10	14	10	283	31.2	6.4	31.96	116.4	116	115.8	89.7	96.7	94.5	90.3	86.8	89.1	104.6
A0A1U7ZV21	ribosome-recycling factor, chloroplastic OS=Nelumbo nucifera OX=4432 GN=LOC104596501 PE=3 SV=1	33	8	15	8	280	31.2	9.23	37.28	108.6	111.3	113.6	96.4	100.2	96.3	90	93	92.4	98.1
A0A1U8A7Q8	activator of 90 kDa heat shock protein ATPase homolog 1-like isoform X2 OS=Nelumbo nucifera OX=4432 GN=LOC104597578 PE=4 SV=1	48	13	18	6	350	39	6.25	39.64	117	117.3	114.2	94.3	93.3	92.7	85.9	93.9	87.1	104.4
A0A1U7ZZ17	MLP-like protein 423 OS=Nelumbo nucifera OX=4432 GN=LOC104595440 PE=4 SV=1	53	9	23	9	158	17.7	5.47	65.96	134.1	133	135.4	90.2	89.3	92.2	71.9	78.1	73.4	102.4
A0A1U7Z284	3-oxoacyl-[acyl-carrier-protein] synthase I, chloroplastic OS=Nelumbo nucifera OX=4432 GN=LOC104585947 PE=3 SV=1	11	6	9	4	471	50.1	7.65	31.77	97.6	96.5	99.7	103.8	102.7	103	98.2	95.2	105.1	98.1
A0A1U8AFW2	Ferritin OS=Nelumbo nucifera OX=4432 GN=LOC104602526 PE=3 SV=1	29	8	12	4	254	28.4	5.83	32.86	119	114.8	116.7	81.5	85.4	88.5	98	95.6	97.2	103.4
A0A1U8AK17	Pyrophosphate--fructose 6-phosphate 1-phosphotransferase subunit alpha OS=Nelumbo nucifera OX=4432 GN=LOC104603836 PE=3 SV=1	15	8	14	3	617	67.4	7.27	32.97	146	145.7	149.1	76.1	80.9	75.9	79.6	67.6	74.3	104.8
A0A1U7Z6Z9	uncharacterized protein OsI_027940-like OS=Nelumbo nucifera OX=4432 GN=LOC104587414 PE=4 SV=1	61	8	16	7	175	19.9	4.51	34.26	90.3	91.2	92.5	111.4	106.5	112.2	101.3	100.2	96.9	97.5
A0A1U8ATR6	Tubulin-specific chaperone A OS=Nelumbo nucifera OX=4432 GN=LOC104606383 PE=3 SV=1	69	9	19	9	112	12.7	5.21	42.69	116.4	114.1	114.2	92.8	94	94.4	90.1	92.5	90.8	100.8
A0A1U8B909	uncharacterized protein LOC104608496 isoform X1 OS=Nelumbo nucifera OX=4432 GN=LOC104608496 PE=4 SV=1	31	11	17	11	461	50.8	7.44	36.58	114.5	115.8	113	95.7	95	94.8	84.7	92.3	93	101.1
A0A1U8A3T7	probable acyl-CoA dehydrogenase IBR3 OS=Nelumbo nucifera OX=4432 GN=LOC104598895 PE=4 SV=1	20	14	15	14	834	92.5	8.24	34	112.4	114.8	115.6	94.9	94.8	94.4	87.9	91.3	91.8	102.1
A0A1U8A3S2	Ribosomal protein L19 OS=Nelumbo nucifera OX=4432 GN=LOC104598886 PE=3 SV=1	37	9	23	2	208	24.3	11.43	49.76	104.7	101.8	102.1	90.6	91.7	90.4	110.3	106.9	102.9	98.7
A0A1U8BLR1	uncharacterized protein LOC104612513 OS=Nelumbo nucifera OX=4432 GN=LOC104612513 PE=4 SV=1	48	8	19	8	161	17.6	5.05	45.35	41.5	43	40.5	119.8	121.3	122.6	141.6	139.5	135.5	94.6
A0A1U8AYW4	Malate dehydrogenase OS=Nelumbo nucifera OX=4432 GN=LOC104605538 PE=3 SV=1	27	7	16	5	356	37.6	8.5	37.92	123.5	129.3	125.6	90.5	84.8	86	83.6	85.4	86.7	104.5
A0A1U7ZNH7	U1 small nuclear ribonucleoprotein 70 kDa-like OS=Nelumbo nucifera OX=4432 GN=LOC104595719 PE=4 SV=1	30	15	21	15	499	59.8	8.72	41.77	100.8	104.2	101.2	98.6	98.3	99.7	98.6	96.3	102.3	99.8
A0A1U8AFN0	60S ribosomal protein L30 OS=Nelumbo nucifera OX=4432 GN=LOC104600070 PE=4 SV=1	32	4	17	1	112	12.4	9.69	44.74	112	117.6	99.1	96.8	101.3	97.1	95.6	97.5	84	99
A0A1U7Z6I4	peroxisomal membrane protein PEX14 isoform X1 OS=Nelumbo nucifera OX=4432 GN=LOC104587271 PE=4 SV=1	26	12	14	12	549	59.8	5.66	25.87	94	92	90	98.8	103.2	99.8	104.5	112.6	106.2	98.8
A0A1U7ZYG9	uncharacterized protein OsI_027940-like OS=Nelumbo nucifera OX=4432 GN=LOC104598967 PE=4 SV=1	48	10	18	7	187	21.2	4.58	41.26	115.1	113.3	114.3	91.2	95.2	94	88.4	91.6	93.7	103.2
A0A1U8Q653	LOW QUALITY PROTEIN: uncharacterized protein LOC104598700 OS=Nelumbo nucifera OX=4432 GN=LOC104598700 PE=4 SV=1	17	5	13	1	332	35.6	6.24	35.52	96.8	101.8	92.8	101.3	101.1	101.9	104.2	101.5	96.6	102
A0A1U7Z874	Dihydrolipoamide acetyltransferase component of pyruvate dehydrogenase complex OS=Nelumbo nucifera OX=4432 GN=LOC104587351 PE=3 SV=1	23	13	17	13	633	68.5	6.23	36.99	99.3	96.1	100.3	114.9	109.6	111	89.2	90.1	86.7	102.9
A0A1U7Z957	copper transport protein ATX1-like OS=Nelumbo nucifera OX=4432 GN=LOC104588098 PE=4 SV=1	73	6	12	6	110	11.6	4.94	32	127.4	125.4	129.1	88.2	88	87.7	79.9	85	83.9	105.4
A0A1U8Q326	subtilisin-like protease SBT3.17 OS=Nelumbo nucifera OX=4432 GN=LOC104596920 PE=4 SV=1	43	5	18	5	124	12.9	7.58	59.46	63.5	65.5	63.4	104.5	108.8	105.8	132.4	134.1	129.9	91.9
D3WC56	Cytochrome f OS=Nelumbo nucifera OX=4432 GN=petA PE=3 SV=1	22	7	15	7	320	35.2	8.56	38.32	87.6	88.8	85.6	104.6	108	104.1	108.2	104.8	110.9	97.4
A0A1U8Q3H1	Clustered mitochondria protein homolog OS=Nelumbo nucifera OX=4432 GN=LOC104597504 PE=3 SV=1	11	13	14	12	1424	155.6	6.52	33.67	114	122	111	94.8	93.5	92.2	83.9	85.7	97.1	105.9
A0A1U8QBF2	eukaryotic translation initiation factor 2 subunit beta-like isoform X2 OS=Nelumbo nucifera OX=4432 GN=LOC104609940 PE=4 SV=1	42	10	15	4	267	30.1	6.42	37.03	109.1	108.2	114.9	92.5	105.1	97.7	90.1	87.9	96.7	97.8
A0A1U8Q221	heat shock 70 kDa protein 17 OS=Nelumbo nucifera OX=4432 GN=LOC104590620 PE=3 SV=1	18	13	15	13	804	89.5	5.76	33.66	89	88.8	90.3	102.7	101.6	103.5	108.9	109.8	108.4	97.1
A0A1U7ZNQ3	probable sucrose-phosphate synthase 1 OS=Nelumbo nucifera OX=4432 GN=LOC104592518 PE=3 SV=1	12	14	17	5	1061	118.8	6.48	40.82	114.8	115.5	111.9	94.7	95.5	95	90.5	88.8	91.7	101.6
A0A1U8B0W4	acetyl-CoA carboxylase 1-like OS=Nelumbo nucifera OX=4432 GN=LOC104605928 PE=4 SV=1	7	13	17	13	2269	252.6	6.55	27.81	131.4	134.5	123	80.8	85.4	87.4	83.9	84.6	78.7	110.2
A0A1U8A170	glycine-rich RNA-binding protein GRP1A-like OS=Nelumbo nucifera OX=4432 GN=LOC104595682 PE=4 SV=1	54	8	18	4	153	16	8.15	44.64	117.3	119.3	119.5	73.2	76.1	73.8	104.2	111.5	107	98.1
A0A1U7ZYA8	Beta-galactosidase OS=Nelumbo nucifera OX=4432 GN=LOC104594825 PE=3 SV=1	18	12	18	12	845	92.7	6.35	33.24	85.2	86	81.2	108	114.5	118.7	99.2	104.9	104.5	97.8
A0A1U8AJP7	uncharacterized protein LOC104604700 OS=Nelumbo nucifera OX=4432 GN=LOC104604700 PE=4 SV=1	17	5	13	5	369	40.1	7.74	35.52	91.1	94.6	91.1	107.3	100.5	105.4	97.8	107.1	106	98.9
A0A1U8AG83	large proline-rich protein bag6-B OS=Nelumbo nucifera OX=4432 GN=LOC104603706 PE=4 SV=1	12	9	11	9	950	99.5	5.78	26.04	104.1	105.5	100.9	94.4	97.8	95.3	96.1	104	98.5	103.4
A0A1U8A2R8	eukaryotic translation initiation factor 2 subunit beta isoform X1 OS=Nelumbo nucifera OX=4432 GN=LOC104600182 PE=4 SV=1	42	10	14	4	269	30.4	6.42	34.27	109.2	112.1	104.6	96.5	100.3	97.2	89.1	92.5	94.5	103.9
A0A1U7ZDH8	3-oxoacyl-[acyl-carrier-protein] reductase 4-like OS=Nelumbo nucifera OX=4432 GN=LOC104592953 PE=4 SV=1	29	9	15	5	332	34.6	9.09	40.68	120	124.1	117.7	89.5	89.2	90	90.4	88.2	88.5	102.4
A0A1U7ZEJ5	PTI1-like tyrosine-protein kinase 1 isoform X1 OS=Nelumbo nucifera OX=4432 GN=LOC104589714 PE=3 SV=1	32	10	14	3	400	44.1	8.4	33.02	93.8	97.6	94.9	97.9	101.5	100.4	107	108.4	102.8	95.6
A0A1U8BDG8	Nuclear pore protein OS=Nelumbo nucifera OX=4432 GN=LOC104613434 PE=3 SV=1	18	14	16	14	864	96.4	7.17	37.58	105.6	106.4	104.5	99	98.8	102.6	96.7	92.8	91	102.7
A0A1U8QBE2	uncharacterized protein LOC109115633 OS=Nelumbo nucifera OX=4432 GN=LOC109115633 PE=4 SV=1	23	13	16	9	590	64.2	8.31	34.83	101	100.1	95.1	98	104.6	100.9	96.5	100.7	99.5	103.5
A0A1U8A4S0	protein SGT1 homolog OS=Nelumbo nucifera OX=4432 GN=LOC104600236 PE=4 SV=1	33	10	13	8	362	40.5	5.27	29.65	138.1	139.4	139.7	84.4	86	88.6	72.2	71.5	74.3	105.8
A0A1U7ZE65	Glutamate decarboxylase OS=Nelumbo nucifera OX=4432 GN=LOC104589582 PE=3 SV=1	24	10	14	7	494	55.8	5.96	23.31	127.3	118.5	120.2	84.8	85.3	86.1	92.4	87.2	90.7	107.7
A0A1U8B980	3-hydroxy-3-methylglutaryl coenzyme A synthase OS=Nelumbo nucifera OX=4432 GN=LOC104608333 PE=3 SV=1	26	10	20	4	475	52.6	6.34	39.06	164.2	160.4	165.3	70.1	69.7	67.9	65.2	64.4	62.9	109.9
A0A1U8AS13	60S ribosomal protein L30-like OS=Nelumbo nucifera OX=4432 GN=LOC104605905 PE=3 SV=1	38	5	18	1	112	12.3	9.69	49.56	105.8	101	106.7	96.2	97	95.2	99.5	100.3	97.5	100.7
A0A1U8A4X7	protein CURVATURE THYLAKOID 1A, chloroplastic-like OS=Nelumbo nucifera OX=4432 GN=LOC104600289 PE=4 SV=1	25	7	14	7	167	18	9.2	37.3	104.7	100.4	102.2	98.9	97.9	98	100.1	100.2	98.2	99.4
A0A1U8B5L3	transmembrane protein 214 OS=Nelumbo nucifera OX=4432 GN=LOC104609981 PE=4 SV=1	17	10	15	7	595	65.1	8.84	32.57	134.7	135	136.2	87.6	88	87.8	76.9	77.3	73.7	102.7
A0A1U7ZBZ7	DEAD-box ATP-dependent RNA helicase 20-like OS=Nelumbo nucifera OX=4432 GN=LOC104593097 PE=3 SV=1	18	10	11	6	719	76.3	10.14	30.95	92	97.5	95.6	101.1	102.4	98.3	96.7	111.5	103.4	101.5
A0A1U7YY81	probable nucleoredoxin 1 OS=Nelumbo nucifera OX=4432 GN=LOC104587228 PE=4 SV=1	25	10	12	10	498	55.9	5.3	30.37	120.2	116.3	123.1	90.7	92.3	90.7	89.5	90.1	86.4	100.7
A0A1U8ANS5	alpha-soluble NSF attachment protein-like OS=Nelumbo nucifera OX=4432 GN=LOC104602487 PE=4 SV=1	37	10	19	9	289	32.7	5.02	37.86	111	111.9	109.7	95.7	98.1	96.8	89.1	95.5	92.2	100
A0A1U8A262	beta-xylosidase/alpha-L-arabinofuranosidase 2-like OS=Nelumbo nucifera OX=4432 GN=LOC104600010 PE=4 SV=1	15	10	17	10	773	83.6	7.69	39.85	106.5	106.1	101.8	99.2	107.3	101.1	92.2	91	92.1	102.7
A0A1U8AJZ0	thylakoid lumenal 15 kDa protein 1, chloroplastic OS=Nelumbo nucifera OX=4432 GN=LOC104601102 PE=4 SV=1	43	7	11	7	230	24.4	8.34	28.65	87.9	87.8	89	99.3	101.5	104.5	108.3	108.1	111.6	102
A0A1U7Z1U2	Terpene cyclase/mutase family member OS=Nelumbo nucifera OX=4432 GN=LOC104588379 PE=3 SV=1	16	11	16	6	757	86	6.89	38.42	149	146	149.9	80.5	80.6	72.9	70.7	76	69.7	104.7
A0A1U8BNS4	multiple organellar RNA editing factor 8, chloroplastic/mitochondrial-like OS=Nelumbo nucifera OX=4432 GN=LOC104613103 PE=4 SV=1	21	8	13	5	444	50	9.47	34.5	102.2	105.9	103.3	98.2	101.3	95.3	98	97.6	98.4	99.7
A0A1U8B9F5	cytochrome c oxidase subunit 6b-1-like OS=Nelumbo nucifera OX=4432 GN=LOC104608644 PE=4 SV=1	58	8	19	5	188	21.3	4.31	35.8	102.6	102.6	100.5	99.1	102.4	101	97.1	94.6	99.6	100.3
A0A1U7Z0I3	V-type proton ATPase subunit G OS=Nelumbo nucifera OX=4432 GN=LOC104587944 PE=3 SV=1	59	6	11	6	110	12.2	7.64	31.06	95.5	100.9	102.7	96.4	96	98.2	104	103.3	102.6	100.4
A0A1U8AZ78	quinone oxidoreductase PIG3 OS=Nelumbo nucifera OX=4432 GN=LOC104605652 PE=4 SV=1	36	10	14	10	325	34.6	7.39	26.87	107.4	106.2	106.5	95.4	97.1	95.6	97.9	97.7	93.2	102.9
A0A1U8Q4D5	probable methionine--tRNA ligase isoform X1 OS=Nelumbo nucifera OX=4432 GN=LOC104594481 PE=4 SV=1	26	10	17	10	407	44.9	6.87	30.6	119.4	115.9	117	93.5	95.2	90.3	89.4	94.9	84.7	99.7
A0A1U8AAE3	uncharacterized protein LOC104598575 OS=Nelumbo nucifera OX=4432 GN=LOC104598575 PE=4 SV=1	33	12	15	12	396	43.1	5.74	35.31	157	153.6	157.5	74.6	76.1	70.7	66.8	69.5	68.8	105.5
A0A1U8A0B8	alpha-dioxygenase 1-like OS=Nelumbo nucifera OX=4432 GN=LOC104595431 PE=4 SV=1	21	10	13	10	642	73.2	7.36	29.36	91.3	95.6	97.4	94.3	95.7	101.1	113	107.5	106.1	98
A0A1U7ZEX8	prefoldin subunit 6 OS=Nelumbo nucifera OX=4432 GN=LOC104589403 PE=4 SV=1	65	10	13	10	130	14.7	9.26	35.89	104.1	103	104.7	95.2	99.7	97.8	96.3	101.7	97.8	99.8
A0A1U8A6Q3	uncharacterized protein LOC104597307 OS=Nelumbo nucifera OX=4432 GN=LOC104597307 PE=4 SV=1	14	7	12	7	532	59	5.4	27.33	96.3	97.5	99.7	98.7	101.3	102	97.5	100.5	100.7	105.9
A0A1U8BJ22	uncharacterized protein At1g04910-like OS=Nelumbo nucifera OX=4432 GN=LOC104611398 PE=4 SV=1	31	11	16	11	413	46.3	8.41	34.14	161.7	158.2	158.8	73.6	81.8	71.6	59.2	66.2	61.2	107.7
A0A1U8AB97	40S ribosomal protein S19-3 OS=Nelumbo nucifera OX=4432 GN=LOC104598814 PE=4 SV=1	62	10	30	1	143	16.1	10.18	74.19	106.7	104.4	104.9	95.6	100.9	94	95.7	96.4	96.7	104.7
A0A1U7YTA1	peroxiredoxin-2E-1, chloroplastic OS=Nelumbo nucifera OX=4432 GN=LOC104587577 PE=4 SV=1	44	6	16	6	227	24.3	8.38	42.27	104	101	104.8	100.6	101.4	99.9	100.3	94.9	94.3	98.8
A0A1U8QAT4	ubiquitin-conjugating enzyme E2 36-like OS=Nelumbo nucifera OX=4432 GN=LOC104611620 PE=4 SV=1	53	6	14	1	154	17.3	5.29	29.11	101.6	97	91.1	98.8	104	102.1	102.3	101.4	103.6	98.2
A0A1U8ALJ1	uncharacterized protein LOC104605524 OS=Nelumbo nucifera OX=4432 GN=LOC104605524 PE=4 SV=1	17	11	14	11	732	81.7	6.19	24.21	101.8	99.4	99.2	100.2	103.2	101.7	96.8	103.2	92.9	101.6
A0A1U8AJY5	ribulose bisphosphate carboxylase/oxygenase activase, chloroplastic isoform X1 OS=Nelumbo nucifera OX=4432 GN=LOC104601096 PE=4 SV=1	29	10	13	3	474	52	5.91	30.95	166	183.9	172.5	61.9	65.2	70.1	51.1	58.6	63.7	107
A0A1U8ABG1	60S ribosomal protein L5-like OS=Nelumbo nucifera OX=4432 GN=LOC104602713 PE=3 SV=1	20	7	16	3	302	34.7	8.87	46.8	102.9	111.9	108.7	93.4	99.5	101.6	84.5	96.8	99.1	101.7
A0A1U7Z787	4-coumarate--CoA ligase-like 5 OS=Nelumbo nucifera OX=4432 GN=LOC104587082 PE=4 SV=1	19	9	11	9	560	60.9	8.34	29.33	94.7	94.9	93.8	106.7	108.3	108.8	95.5	96.9	100.5	99.9
A0A1U8AQT5	plastidic glucose transporter 4 OS=Nelumbo nucifera OX=4432 GN=LOC104602907 PE=3 SV=1	12	6	23	5	546	57.8	9.57	62.12	90.1	98.2	86.6	102.9	100.7	99.1	104.1	102.3	117.9	98.3
A0A1U7ZGY0	Ribokinase OS=Nelumbo nucifera OX=4432 GN=LOC104590447 PE=3 SV=1	26	9	11	9	381	40	6.32	30.51	96.6	100.6	97.4	105.1	98.6	136.4	90.2	90.5	92.4	92.1
A0A1U8BLL7	Methylenetetrahydrofolate reductase OS=Nelumbo nucifera OX=4432 GN=LOC104612216 PE=3 SV=1	21	11	15	7	594	67.3	6.04	27.99	135.8	137.2	133.2	82.9	76.9	80.3	80.2	83.4	88	102.2
A0A1U8B935	flavonol synthase/flavanone 3-hydroxylase OS=Nelumbo nucifera OX=4432 GN=LOC104608517 PE=3 SV=1	39	9	13	9	335	38.1	5.76	33.76	166.7	169.8	165.8	65.7	67.4	66.6	62.5	65.5	63.2	107
A0A1U7ZZX8	glycine-rich RNA-binding protein GRP1A-like OS=Nelumbo nucifera OX=4432 GN=LOC104595681 PE=4 SV=1	55	8	19	4	146	15.7	8.15	46.7	84.6	84.5	84.9	93.1	94	90.7	128.7	121.9	122.1	95.6
A0A1U8AXZ2	uncharacterized protein LOC104605036 isoform X1 OS=Nelumbo nucifera OX=4432 GN=LOC104605036 PE=4 SV=1	16	12	15	12	805	91.1	6.64	31.16	112.3	112.8	113.7	94.9	95.7	97.3	87.5	87.3	95.1	103.3
A0A1U7YWD3	26S proteasome non-ATPase regulatory subunit 14 homolog OS=Nelumbo nucifera OX=4432 GN=LOC104587696 PE=4 SV=1	30	9	19	2	308	34.4	6.67	48.19	106.9	101.8	104.4	101.5	101.2	105.3	93.9	93.6	89.8	101.5
A0A1U7Z1M5	caffeic acid 3-O-methyltransferase 1 OS=Nelumbo nucifera OX=4432 GN=LOC104585771 PE=3 SV=1	23	9	14	9	364	39.7	5.43	39.91	136.2	138.1	137.6	80.2	83.4	81.1	77.7	78.9	83.8	103
A0A1U8AHA8	calcium-dependent protein kinase 1-like OS=Nelumbo nucifera OX=4432 GN=LOC104600271 PE=4 SV=1	24	10	13	5	531	59.9	6.33	30.22	112	111.5	108.1	97	98.4	98.6	90.7	91	93	99.8
A0A1U7Z2D2	polypyrimidine tract-binding protein homolog 3-like OS=Nelumbo nucifera OX=4432 GN=LOC104589601 PE=4 SV=1	27	11	15	3	447	49.9	7.84	36.26	104.8	100.6	102.3	95	102.6	101.5	94.1	96.1	98.6	104.5
A0A1U8AJ62	Phospho-2-dehydro-3-deoxyheptonate aldolase OS=Nelumbo nucifera OX=4432 GN=LOC104604561 PE=3 SV=1	22	10	15	4	538	59.3	8.54	36.42	167.3	197.9	161.6	61	57.4	53.4	55.9	62.6	79.4	103.5
A0A1U7ZWJ0	40S ribosomal protein S19-3 OS=Nelumbo nucifera OX=4432 GN=LOC104597979 PE=4 SV=1	62	10	30	1	143	16.1	10.18	73.65	105.5	105.5	105.3	96.3	97.2	95.9	98.9	97.5	98.1	99.9
A0A1U8AK55	ras-related protein Rab2BV OS=Nelumbo nucifera OX=4432 GN=LOC104601140 PE=4 SV=1	46	10	15	1	217	24	6.8	40.65	109.8	114.8	111.8	90	89.8	95	98	93.5	88.6	108.7
A0A1U8QCD3	polyadenylate-binding protein RBP45-like isoform X1 OS=Nelumbo nucifera OX=4432 GN=LOC104612820 PE=4 SV=1	24	8	15	5	430	48.4	6	36.97	98.9	96.1	97.1	96.9	102.6	98.1	103.2	106.5	103.5	97.2
A0A1U8AHW2	cytoplasmic 60S subunit biogenesis factor REI1 homolog 1 OS=Nelumbo nucifera OX=4432 GN=LOC104603156 PE=4 SV=1	24	10	15	10	404	45.6	6.11	32.54	59.1	58.9	59	115.9	112.8	114.4	124.6	124.3	124.3	106.7
A0A1U8BCA2	probable NADH dehydrogenase [ubiquinone] 1 alpha subcomplex subunit 5, mitochondrial OS=Nelumbo nucifera OX=4432 GN=LOC104613061 PE=4 SV=1	57	11	15	11	169	19.5	5.15	37.95	100.7	98.8	100	96.8	96.7	100.6	101.5	101	104.2	99.8
A0A1U7ZV20	squamous cell carcinoma antigen recognized by T-cells 3-like isoform X1 OS=Nelumbo nucifera OX=4432 GN=LOC104593909 PE=4 SV=1	19	14	17	11	826	94.7	6.02	30.66	98.3	98.3	100.4	100.3	99	102.4	100.7	99.9	99.8	101
A0A1U8A1F1	mitochondrial import receptor subunit TOM40-1-like OS=Nelumbo nucifera OX=4432 GN=LOC104599790 PE=4 SV=1	28	6	15	6	312	34.9	7.55	28.15	99.8	99.9	95	100.9	102	98.2	98	102.7	98.4	105.1
A0A1U8B5N2	transmembrane and coiled-coil domain-containing protein 4-like isoform X1 OS=Nelumbo nucifera OX=4432 GN=LOC104607528 PE=4 SV=1	19	13	14	13	670	73.4	5.12	32.08	103.1	101.5	102.7	100.3	103.3	104.4	96.4	95.3	93.6	99.4
A0A1U8AT74	Ribosomal protein L19 OS=Nelumbo nucifera OX=4432 GN=LOC104606217 PE=3 SV=1	36	9	23	2	204	24.1	11.43	45.35	115.4	109.7	106.2	87.3	82.5	81.7	107.8	112.5	98.7	98.1
A0A1U7ZT47	formate--tetrahydrofolate ligase-like isoform X2 OS=Nelumbo nucifera OX=4432 GN=LOC104597573 PE=3 SV=1	16	10	13	4	637	67.9	7.01	31.98	106.4	103	103.5	101.9	94.3	100.6	102.7	99.6	90.9	97.2
A0A1U8B517	dihydropyrimidine dehydrogenase (NADP(+)), chloroplastic OS=Nelumbo nucifera OX=4432 GN=LOC104607306 PE=4 SV=1	25	10	18	10	423	46.4	7.37	36.96	103.6	102.4	103.5	97.9	95.7	98.6	100	98.4	97.1	102.9
A0A1U7ZZK8	splicing factor 3B subunit 3-like OS=Nelumbo nucifera OX=4432 GN=LOC104599257 PE=4 SV=1	11	11	13	3	1215	134.8	5.52	29.96	95.4	107.9	101.8	100.2	95.1	99.8	94.8	97.1	104.4	103.6
A0A1U8BC22	60S ribosomal protein L10 OS=Nelumbo nucifera OX=4432 GN=LOC104612975 PE=4 SV=1	38	9	21	2	220	25	10.49	55.2	104.6	103.6	102.7	98.1	101.4	98.5	96.1	95.8	98.4	100.9
A0A1U8AXG8	pentatricopeptide repeat-containing protein At2g15690-like OS=Nelumbo nucifera OX=4432 GN=LOC104608463 PE=4 SV=1	27	13	15	13	593	67	7.74	27.72	91.7	85.9	89.7	103.3	104.3	103.5	108.4	110.4	102.1	100.6
A0A1U7ZBJ5	polyribonucleotide nucleotidyltransferase 2, mitochondrial isoform X1 OS=Nelumbo nucifera OX=4432 GN=LOC104591429 PE=3 SV=1	14	14	16	14	991	109.1	7.33	32.45	93.2	94.5	91.1	99.6	101.4	102.3	105.4	102.7	110.4	99.4
A0A1U7Z3B3	uncharacterized protein LOC104585868 OS=Nelumbo nucifera OX=4432 GN=LOC104585868 PE=4 SV=1	11	12	13	12	1306	140.2	7.8	23.42	110.4	115.4	107	98	98.4	98.8	83.3	86	99.8	103.1
A0A1U8ADB7	acid phosphatase 1 OS=Nelumbo nucifera OX=4432 GN=LOC104602789 PE=4 SV=1	35	8	19	8	258	29.6	8.27	44.97	97.3	100.5	100.4	103.3	103.6	103.8	95.4	97.5	99	99.2
A0A1U7ZUY6	uncharacterized protein LOC104597547 OS=Nelumbo nucifera OX=4432 GN=LOC104597547 PE=3 SV=1	26	13	18	8	573	64.3	5.49	31.61	97.6	98	98.9	101.5	101.7	100	97.8	101.7	101	101.7
A0A1U7ZW26	caffeic acid 3-O-methyltransferase-like OS=Nelumbo nucifera OX=4432 GN=LOC104596816 PE=3 SV=1	17	5	12	5	366	40.4	5.05	30.61	86.2	91.5	89.9	94.8	95.6	101.3	108.8	113.4	119.5	98.8
A0A1U8BC17	hydroxyacylglutathione hydrolase cytoplasmic OS=Nelumbo nucifera OX=4432 GN=LOC104612971 PE=3 SV=1	48	10	21	10	258	29	6.38	49.36	91.9	89.8	93	105.7	110.8	106.9	101.9	102.9	99.9	97.2
A0A1U8AGB9	Pyruvate kinase OS=Nelumbo nucifera OX=4432 GN=LOC104600275 PE=3 SV=1	20	10	12	5	575	63.5	8.03	31.42	191.8	193	198.9	52.5	58.5	50.5	43.7	53	49.7	108.4
A0A1U8AA66	Translation machinery-associated protein 22 OS=Nelumbo nucifera OX=4432 GN=LOC104600701 PE=3 SV=1	50	7	11	4	199	21.6	6.73	30.85	110.9	107.1	109.3	93	96.3	101.1	95.3	92.3	92.5	102.1
A0A1U7YUY1	probable transcription factor At5g28040 OS=Nelumbo nucifera OX=4432 GN=LOC104586199 PE=4 SV=1	38	11	15	11	316	36.2	5.77	26.16	103.1	104.8	107.9	92.7	105	93.3	93.6	95.7	102.6	101.4
A0A1U7YW18	shikimate O-hydroxycinnamoyltransferase-like OS=Nelumbo nucifera OX=4432 GN=LOC104588431 PE=4 SV=1	22	8	16	8	440	49.2	7.61	40.43	113.6	115.2	114.3	89.2	94.7	94.3	91.4	92.8	92.1	102.5
A0A1U7ZP56	serpin-ZX OS=Nelumbo nucifera OX=4432 GN=LOC104595874 PE=3 SV=1	24	9	17	9	391	42.7	5.94	46.51	95.4	96.5	98	107.3	105	106.2	96.4	98	96.6	100.7
A0A1U7ZLR7	Glucose-6-phosphate 1-dehydrogenase OS=Nelumbo nucifera OX=4432 GN=LOC104591632 PE=3 SV=1	27	12	15	3	518	59.2	6.61	33.93	126.2	113	121	90	89.3	82.6	90.1	93.7	90.2	103.9
A0A1U7YY86	Pantothenate kinase 2 OS=Nelumbo nucifera OX=4432 GN=LOC104587232 PE=3 SV=1	17	12	15	12	908	100.6	6.14	27.27	86	88	83.7	106.1	104.7	106.9	109.7	108.6	106.1	100.1
A0A1U7Z8L8	uncharacterized protein LOC104592226 OS=Nelumbo nucifera OX=4432 GN=LOC104592226 PE=4 SV=1	26	9	18	9	442	49.2	10.07	36.29	98.2	98.6	100.4	95.2	94.4	96.3	106.8	104.5	103.8	101.8
A0A1U7ZQW8	uncharacterized protein LOC104596392 isoform X1 OS=Nelumbo nucifera OX=4432 GN=LOC104596392 PE=4 SV=1	19	8	13	8	574	64.4	6.32	27.56	99.9	106.3	103.7	89.4	90.2	93.6	101.2	109.8	105.6	100.3
A0A1U8BL33	60S ribosomal protein L26-1-like OS=Nelumbo nucifera OX=4432 GN=LOC104612302 PE=4 SV=1	39	8	26	5	151	17	10.7	46.57	101.5	97.4	94.4	103.4	102	105.4	97.4	98.7	96.4	103.4
A0A1U7ZW47	Nascent polypeptide-associated complex subunit beta OS=Nelumbo nucifera OX=4432 GN=LOC104596829 PE=3 SV=1	67	7	14	1	172	18.6	8.41	36.02	109.1	112.6	82.7	97.7	107.1	95	94.4	107	84.3	110.1
A0A1U7YTX1	60S acidic ribosomal protein P2-like OS=Nelumbo nucifera OX=4432 GN=LOC104586918 PE=3 SV=1	59	6	16	1	114	11.4	4.37	42.31	99.1	109.8	95.7	96.9	104.7	97.1	93.8	101.3	101.7	99.9
A0A1U7Z319	eukaryotic translation initiation factor 5 OS=Nelumbo nucifera OX=4432 GN=LOC104588720 PE=4 SV=1	24	10	15	9	454	50	6.06	36.47	94.6	95.1	94.4	100.8	105.9	103.3	105.3	102.4	99.5	98.7
A0A1U7Z5R1	Calcium-transporting ATPase OS=Nelumbo nucifera OX=4432 GN=LOC104590643 PE=3 SV=1	13	11	12	11	1019	111	6.65	29.47	113.8	116.3	108.3	93.6	98.9	94	92	92.6	85.8	104.9
A0A1U8QC93	stem-specific protein TSJT1-like isoform X1 OS=Nelumbo nucifera OX=4432 GN=LOC104612523 PE=4 SV=1	30	6	13	3	266	28.8	6.52	38.11	126.6	117.5	120.4	95.9	95.2	94.4	86.1	84.1	75.5	104.3
A0A1U8AE88	protein MODIFIER OF SNC1 11-like isoform X1 OS=Nelumbo nucifera OX=4432 GN=LOC104599322 PE=4 SV=1	34	7	11	7	229	25.4	8.06	26.69	76.5	81.1	80.6	108.9	105.1	107.9	113.2	116.4	114.8	95.6
A0A1U7Z6X4	serine/threonine-protein kinase SRK2A OS=Nelumbo nucifera OX=4432 GN=LOC104586970 PE=3 SV=1	37	9	14	4	355	40.7	6.06	31.63	105.4	104	105.3	99.2	98.8	96.2	98.4	99	96.4	97.3
A0A1U8A4U4	uncharacterized protein LOC104600262 isoform X1 OS=Nelumbo nucifera OX=4432 GN=LOC104600262 PE=4 SV=1	19	13	18	13	837	93.3	7.11	33.89	50.7	54.4	51.9	120.8	119.5	116.5	134	126.2	131.1	94.8
A0A1U8A542	Nascent polypeptide-associated complex subunit beta OS=Nelumbo nucifera OX=4432 GN=LOC104596831 PE=3 SV=1	75	7	14	1	155	17	8.37	32.76
A0A1U8AV34	carboxyvinyl-carboxyphosphonate phosphorylmutase, chloroplastic-like OS=Nelumbo nucifera OX=4432 GN=LOC104606734 PE=4 SV=1	28	5	16	5	331	35.9	7.47	26.91	101.5	109.4	101.9	93.2	104.4	99.4	91.2	97	99.9	102.1
A0A1U8AHZ6	17.4 kDa class III heat shock protein OS=Nelumbo nucifera OX=4432 GN=LOC104600474 PE=3 SV=1	36	5	19	5	159	17.7	6.2	42.8	100.5	102	99.6	106.9	101.7	102.9	92.8	90.2	92.2	111.3
A0A1U8B766	uncharacterized protein LOC104607768 OS=Nelumbo nucifera OX=4432 GN=LOC104607768 PE=4 SV=1	13	14	17	14	1098	124.2	5.96	31.93	115.5	116.3	114.3	90.8	92	94.2	89.7	91.8	92.6	102.7
A0A1U8Q6Q8	lanC-like protein GCL1 OS=Nelumbo nucifera OX=4432 GN=LOC104604457 PE=4 SV=1	22	8	13	8	421	46.2	6.79	35.68	44.8	46.2	46.9	124.3	125.2	127.6	129.2	127.4	127.2	101.2
A0A1U7ZGV7	probable acyl-activating enzyme 16, chloroplastic isoform X1 OS=Nelumbo nucifera OX=4432 GN=LOC104590423 PE=4 SV=1	19	11	12	11	732	81.8	8.25	29.86	97.2	96.2	96.8	106	97.8	100.1	100.8	109.2	96.8	99.2
A0A1U7ZMW9	Malic enzyme OS=Nelumbo nucifera OX=4432 GN=LOC104596127 PE=3 SV=1	19	10	15	10	604	66.9	6.65	36.2	99.1	102.5	98.6	96.9	104.1	102.1	98	96.8	102.1	99.8
A0A1U7YR97	Succinate--CoA ligase [ADP-forming] subunit alpha, mitochondrial OS=Nelumbo nucifera OX=4432 GN=LOC104586082 PE=3 SV=1	25	7	30	7	346	35.9	8.82	71.08	97.9	98	93.5	102.5	103.3	100.6	100.3	97.8	104	102.1
A0A1U8A0A5	translationally-controlled tumor protein homolog OS=Nelumbo nucifera OX=4432 GN=LOC104598960 PE=3 SV=1	59	8	19	5	168	19.1	4.56	49.78	106.6	105.3	109.1	101.3	102.1	103.4	91.4	88.9	90.4	101.5
A0A1U7ZL18	probable pyridoxal 5'-phosphate synthase subunit PDX1 OS=Nelumbo nucifera OX=4432 GN=LOC104595045 PE=3 SV=1	32	10	14	10	309	33	6.33	32.42	109.3	111.5	109.3	98.2	97.5	96.6	88.7	94.6	94.2	100.2
A0A1U7Z2M4	COBW domain-containing protein 1-like isoform X1 OS=Nelumbo nucifera OX=4432 GN=LOC104588595 PE=4 SV=1	21	8	12	8	448	49.7	6.28	26.2	107.1	111.9	111.3	97.1	93	95	90.7	93.7	101.7	98.4
A0A1U8B3L0	40S ribosomal protein S16 OS=Nelumbo nucifera OX=4432 GN=LOC104606670 PE=3 SV=1	50	10	28	1	143	16.4	10.14	59.64	116.1	99.6	98.3	90	104.6	99.6	102.2	100.1	94.7	94.8
A0A1U7ZCZ5	protein DEK-like OS=Nelumbo nucifera OX=4432 GN=LOC104592817 PE=4 SV=1	25	13	14	13	569	63.3	7.83	29.09	54.9	54.4	55.8	112.7	107.8	111	137.7	135.5	133.7	96.5
A0A1U8A9X5	heterogeneous nuclear ribonucleoprotein 1 OS=Nelumbo nucifera OX=4432 GN=LOC104601766 PE=4 SV=1	34	11	15	11	357	39.9	6.9	33.83	104.2	109.5	107.9	97.1	95.8	100.2	93.8	94.4	93	104.2
A0A1U8ACU8	protein decapping 5-like OS=Nelumbo nucifera OX=4432 GN=LOC104603068 PE=4 SV=1	20	10	13	6	612	64.5	8.48	26.37	120.6	118.6	122.8	91.1	93.2	90.4	88	87.7	85.8	101.9
A0A1U8BC65	brefeldin A-inhibited guanine nucleotide-exchange protein 2 OS=Nelumbo nucifera OX=4432 GN=LOC104611857 PE=4 SV=1	8	13	15	4	1775	197.5	5.83	31.73	127.6	116.7	114.8	99.6	95.5	92.2	73.8	84.3	88.8	106.6
A0A1U8A2L5	ATP-dependent (S)-NAD(P)H-hydrate dehydratase OS=Nelumbo nucifera OX=4432 GN=LOC104596442 PE=3 SV=1	32	9	13	9	358	38.5	7.83	27.23	89.7	85.7	90.3	107.1	107.6	110.3	105.9	101	99.7	102.8
A0A1U8Q3X2	Cysteine proteinase inhibitor OS=Nelumbo nucifera OX=4432 GN=LOC109114486 PE=3 SV=1	40	4	12	4	122	13.8	10.05	36.43	71.2	92.3	66	108.4	101	106.2	121.3	116.2	114.9	102.5
A0A1U8B5T0	uncharacterized protein LOC104611043 OS=Nelumbo nucifera OX=4432 GN=LOC104611043 PE=3 SV=1	23	6	15	6	381	41.6	7.2	30.18	93.3	101.1	92.3	100.7	105.2	103.6	93.6	102.9	103.7	103.5
A0A1U8A4X9	pumilio homolog 2-like OS=Nelumbo nucifera OX=4432 GN=LOC104597143 PE=4 SV=1	14	13	18	5	1058	113.7	6.34	27.21	92	95.3	92	110.7	109.1	111	94	98.7	99.5	97.9
A0A1U7YUP7	Clathrin light chain OS=Nelumbo nucifera OX=4432 GN=LOC104587174 PE=3 SV=1	27	7	14	5	372	41.4	5.01	30.97	116.3	126.5	114	100.4	97.3	89.3	72	87.8	96	100.3
A0A1U7Z3Q2	cell division cycle 5-like protein OS=Nelumbo nucifera OX=4432 GN=LOC104589994 PE=4 SV=1	14	14	17	14	1144	128.2	5	24.21	97.7	100.2	98.4	99.3	101	98.5	95.2	101.3	106.6	101.7
A0A1U8BMQ6	L-ascorbate oxidase homolog OS=Nelumbo nucifera OX=4432 GN=LOC104612767 PE=4 SV=1	14	9	18	4	541	60.6	8.94	36.52	112.6	104.3	107.5	99.6	101.9	98.1	91.4	92.1	91.2	101.2
A0A1U8AZX9	succinate dehydrogenase subunit 5, mitochondrial-like OS=Nelumbo nucifera OX=4432 GN=LOC104605866 PE=4 SV=1	47	8	12	7	245	27.5	8.51	28.2	104.4	99.8	105.8	100.4	99	100.9	97	98.5	92.7	101.7
A0A1U8ARQ8	isocitrate dehydrogenase [NAD] regulatory subunit 1, mitochondrial isoform X1 OS=Nelumbo nucifera OX=4432 GN=LOC104603177 PE=4 SV=1	23	8	14	2	380	41.2	7.72	29.72	91	91.8	88.4	105.1	108.9	106.1	98.4	104.6	104.3	101.5
A0A1U8AU69	ubiquitin-60S ribosomal protein L40 OS=Nelumbo nucifera OX=4432 GN=LOC104607638 PE=4 SV=1	45	6	154	1	128	14.7	9.92	305.94	85.1	87.4	85.2	97.5	93	95.6	118.9	117.5	119.4	100.5
A0A1U7ZL09	Peptidyl-prolyl cis-trans isomerase OS=Nelumbo nucifera OX=4432 GN=LOC104595041 PE=3 SV=1	37	8	22	4	231	24.8	7.99	41.34	110.6	107.7	111.6	96.3	97	91.9	97.8	96.5	94.1	96.6
A0A1U8B2Q6	nuclear export mediator factor NEMF isoform X1 OS=Nelumbo nucifera OX=4432 GN=LOC104609037 PE=4 SV=1	13	13	14	13	1145	127.8	6.89	27.33	103.8	104.9	106.2	93.8	97.1	97.6	99.7	95.6	97.6	103.8
A0A1U8BCQ2	phosphoribosylaminoimidazole-succinocarboxamide synthase, chloroplastic OS=Nelumbo nucifera OX=4432 GN=LOC104612041 PE=3 SV=1	19	7	10	7	483	54.5	7.43	28.49	97.6	102.5	98.8	101.2	101.4	105.6	95.1	95.9	101.2	100.7
A0A1U8A486	60S ribosomal protein L30 OS=Nelumbo nucifera OX=4432 GN=LOC104600069 PE=3 SV=1	32	4	15	1	112	12.4	9.77	39.42	97.2	94	90.4	94.4	97.7	88.3	115.7	118.6	111.5	92.3
A0A1U8BD54	40S ribosomal protein S16-like OS=Nelumbo nucifera OX=4432 GN=LOC104612186 PE=3 SV=1	49	10	24	2	144	16.5	10.2	54.63	107.8	106.8	109.3	96.2	97.7	94.5	100.6	93.4	97.9	96
A0A1U7Z7K7	Transmembrane 9 superfamily member OS=Nelumbo nucifera OX=4432 GN=LOC104590088 PE=3 SV=1	11	7	12	3	591	67.5	8.15	34.02	138.8	137.5	143	87.5	85	83.9	74.2	72.7	73.5	103.9
A0A1U7ZV02	40S ribosomal protein S16-like OS=Nelumbo nucifera OX=4432 GN=LOC104596484 PE=3 SV=1	49	10	27	1	144	16.5	10.2	63.34	105.9	108.1	110.1	95.6	98.2	95.2	94.3	95.9	96.7	100
A0A1U8B426	Importin subunit alpha OS=Nelumbo nucifera OX=4432 GN=LOC104607048 PE=3 SV=1	28	11	15	2	533	59.3	5.44	26.27	116.4	132.5	111.5	90.9	93.5	86	83.2	91.7	92.4	101.7
A0A1U7ZRF7	nucleolar protein 56-like OS=Nelumbo nucifera OX=4432 GN=LOC104592928 PE=4 SV=1	17	8	15	1	554	62	8.65	37.01
A0A1U7ZMF6	translocon-associated protein subunit beta-like OS=Nelumbo nucifera OX=4432 GN=LOC104591811 PE=4 SV=1	42	5	10	5	195	21.1	9.73	28.33	108.5	118.2	108.1	100.7	93.5	94.3	89.5	88.9	97.8	100.4
A0A1U7ZWF4	DExH-box ATP-dependent RNA helicase DExH14 isoform X1 OS=Nelumbo nucifera OX=4432 GN=LOC104597958 PE=4 SV=1	8	17	29	15	2089	236.9	6.6	59.47	102.9	105.2	104	96.9	96.1	98.8	100.2	96.1	97.7	102.1
A0A1U7ZWU2	universal stress protein PHOS32 OS=Nelumbo nucifera OX=4432 GN=LOC104597058 PE=4 SV=1	46	10	19	10	164	18.1	6.89	37.14	98.4	100.4	99.7	108.5	104.2	104.4	94.3	94.3	94.2	101.7
A0A1U7ZJA3	ATP-dependent zinc metalloprotease FTSH 2, chloroplastic OS=Nelumbo nucifera OX=4432 GN=LOC104591278 PE=3 SV=1	20	11	13	11	693	74.1	6.25	27.11	106.8	108.6	110	93.4	96.5	100.3	94.2	89	95.6	105.6
A0A1U7ZHR9	calcium-transporting ATPase 4, endoplasmic reticulum-type-like OS=Nelumbo nucifera OX=4432 GN=LOC104594684 PE=3 SV=1	13	12	16	4	1063	116.4	5.58	25.3	137	137.6	140.1	84.6	96.1	78.7	69.2	75.4	71.9	109.5
A0A1U8AS67	Succinate dehydrogenase [ubiquinone] iron-sulfur subunit, mitochondrial OS=Nelumbo nucifera OX=4432 GN=LOC104607007 PE=3 SV=1	33	8	13	8	278	31.2	8.57	29.48	103.2	97.2	99.1	103.9	96.3	97.7	101.8	100.8	101.3	98.7
A0A1U8B590	pto-interacting protein 1 OS=Nelumbo nucifera OX=4432 GN=LOC104607133 PE=3 SV=1	25	8	15	1	362	39	7.23	33.11	84.6	91.3	83.5	104.9	99.8	102	119.9	110.5	107.1	96.4
A0A1U7ZNS2	ubiquitin-NEDD8-like protein RUB2 OS=Nelumbo nucifera OX=4432 GN=LOC104592206 PE=4 SV=1	45	7	158	2	154	17.2	6.06	304.98	97.6	97.5	85.7	105.4	105	104.7	96.9	101.1	106.8	99.3
A0A1U7ZV11	mannosylglycoprotein endo-beta-mannosidase OS=Nelumbo nucifera OX=4432 GN=LOC104596494 PE=4 SV=1	15	11	14	11	973	110.7	6.23	35.91	104.1	107	108.9	99.1	100.8	104.3	92.1	93	91.9	98.8
A0A1U8B3V2	peptide methionine sulfoxide reductase A1-like OS=Nelumbo nucifera OX=4432 GN=LOC104610521 PE=3 SV=1	20	7	12	7	260	28.7	8.68	31.55	95.6	96.5	96.5	104.6	106.2	108.1	98.4	98.6	99.4	96.1
A0A1U8ABY0	60S ribosomal protein L14-1 OS=Nelumbo nucifera OX=4432 GN=LOC104602821 PE=4 SV=1	50	8	20	2	134	15.6	10.32	50.14	104.7	103.4	103	101.4	99.8	102.6	96.9	96.2	94.5	97.5
A0A1U7ZV64	WPP domain-interacting protein 2 OS=Nelumbo nucifera OX=4432 GN=LOC104594339 PE=4 SV=1	27	14	17	14	668	73.3	4.98	28.63	88	90	86.1	102.3	108.8	107.7	104	106.5	107.5	99.1
A0A1U8A3F1	zinc finger CCCH domain-containing protein 37 isoform X1 OS=Nelumbo nucifera OX=4432 GN=LOC104599826 PE=4 SV=1	31	10	11	10	556	60	7.25	26.31	105.9	106.1	101.9	107.6	94.5	83.5	87.3	88	120.9	104.3
A0A1U7Z4S0	cathepsin B-like OS=Nelumbo nucifera OX=4432 GN=LOC104590324 PE=3 SV=1	28	7	12	7	355	39.6	6.01	28.31	103.7	103.2	105.1	90.4	92.3	90.1	106.5	105.1	102.8	100.7
A0A1U7Z8A9	thaumatin-like protein 1 OS=Nelumbo nucifera OX=4432 GN=LOC104587374 PE=4 SV=1	46	6	16	6	231	24.2	5.48	29.27	73.1	71.9	73.7	139.2	139.4	136.8	89.4	86.1	86.5	104
A0A1U8ALP3	Proteasome subunit alpha type OS=Nelumbo nucifera OX=4432 GN=LOC104601831 PE=3 SV=1	35	9	16	1	262	29	5.68	39.41
A0A1U7ZCQ4	uncharacterized protein LOC104589153 isoform X2 OS=Nelumbo nucifera OX=4432 GN=LOC104589153 PE=4 SV=1	32	6	13	6	238	25.9	5.63	29.97	118.7	119.7	119.6	91.3	91.4	91.6	89.5	88.7	87.8	101.5
A0A1U8BF81	Eukaryotic translation initiation factor 3 subunit F OS=Nelumbo nucifera OX=4432 GN=LOC104610487 PE=3 SV=1	45	12	20	7	285	31.6	5.49	46.73	106.4	104.6	103	96.2	101.3	109.7	92.2	91.6	93	101.9
A0A1U8BHF7	Lysine--tRNA ligase OS=Nelumbo nucifera OX=4432 GN=LOC104611144 PE=3 SV=1	21	10	13	10	579	65.6	6.81	28.18	94.6	100.2	96.2	100.6	99.4	102.6	106.2	96.1	104.3	99.8
A0A1U8BA02	transducin beta-like protein 2 OS=Nelumbo nucifera OX=4432 GN=LOC104611244 PE=4 SV=1	21	8	11	8	448	48.4	8.87	28.97	76.8	74.6	76.1	111.4	112.9	112.4	116	110.6	112.1	97.2
A0A1U8B6M2	L-galactose dehydrogenase OS=Nelumbo nucifera OX=4432 GN=LOC104607573 PE=4 SV=1	33	8	11	8	322	34.7	5.94	30.02	113.2	112.8	113.6	97.1	95.8	95	89.1	95.1	85.8	102.7
A0A1U8A3E7	26S proteasome non-ATPase regulatory subunit 13 homolog B OS=Nelumbo nucifera OX=4432 GN=LOC104600383 PE=4 SV=1	24	10	16	6	386	44.4	5.41	37.49	107.1	110.6	108.4	98.2	97.4	96.5	93.8	92.3	95.9	99.8
A0A1U7ZXX0	phosphoribosylformylglycinamidine cyclo-ligase, chloroplastic/mitochondrial OS=Nelumbo nucifera OX=4432 GN=LOC104598835 PE=3 SV=1	29	8	13	8	401	42.7	7.36	25.61	108.4	109.4	110.8	97.1	99.4	97.2	86.5	94.1	95.6	101.4
A0A1U8B5Q5	V-type proton ATPase subunit a OS=Nelumbo nucifera OX=4432 GN=LOC104607555 PE=3 SV=1	17	12	14	12	817	92.7	6.25	32.72	97.5	95	101.2	103.7	102	100.4	100.2	98.6	98.7	102.8
A0A1U7ZLG3	Mg-protoporphyrin IX chelatase OS=Nelumbo nucifera OX=4432 GN=LOC104591883 PE=3 SV=1	30	9	15	9	423	46.4	6.3	33.11	153.6	151.6	156.3	76.7	72.7	75.6	70.4	70.8	69.8	102.5
A0A1U7Z919	Eukaryotic translation initiation factor 3 subunit I OS=Nelumbo nucifera OX=4432 GN=LOC104591719 PE=3 SV=1	28	8	20	1	326	36.1	7.97	43.4	97.6	111.1	107.8	84.5	100.7	94.6	88	114.6	102.3	99
A0A1U7Z6E6	60S ribosomal protein L11-like OS=Nelumbo nucifera OX=4432 GN=LOC104589734 PE=3 SV=1	31	6	19	6	183	20.9	9.92	55.93	109	105.5	109.9	93.2	95.1	94	97.6	99.3	95.1	101.4
A0A1U7Z952	GDP-mannose 4,6 dehydratase 1 OS=Nelumbo nucifera OX=4432 GN=LOC104588090 PE=3 SV=1	26	10	19	6	377	42.3	7.39	37.59	120.4	122.8	120	90.4	90	97.6	85.1	84.7	85.1	103.9
A0A1U7YPF5	uncharacterized protein LOC104586371 OS=Nelumbo nucifera OX=4432 GN=LOC104586371 PE=3 SV=1	13	9	12	9	776	85.5	4.96	30.81	110.3	108.1	106.2	94.8	98.8	97.5	90.5	97.2	91	105.6
A0A1U8Q886	THO complex subunit 4D isoform X1 OS=Nelumbo nucifera OX=4432 GN=LOC104607348 PE=4 SV=1	31	8	15	8	293	32.1	10.49	25.78	95.6	106.7	98.4	90.4	89.8	92.3	106.6	108.1	108.6	103.6
A0A1U7YT39	casein kinase 1-like protein 2 OS=Nelumbo nucifera OX=4432 GN=LOC104586665 PE=3 SV=1	31	13	16	9	476	53.2	9.64	31.63	108.8	107.8	104.9	93.3	99.4	96.5	94.8	98.4	96.1	99.9
A0A1U7ZQ28	60S ribosomal protein L24 OS=Nelumbo nucifera OX=4432 GN=LOC104596154 PE=4 SV=1	29	6	22	2	164	18.6	10.78	70.7	106.2	101.6	108.4	93.9	91.5	91.7	103.8	103.7	99.8	99.3
A0A1U8A2T2	uncharacterized protein LOC104599652 OS=Nelumbo nucifera OX=4432 GN=LOC104599652 PE=4 SV=1	10	13	18	10	1328	146.1	5.49	34.56	114	114.2	117.2	95.8	96.6	94.9	87	88.4	90.3	101.6
A0A1U8A500	calcium-dependent protein kinase SK5 OS=Nelumbo nucifera OX=4432 GN=LOC104596804 PE=3 SV=1	24	9	17	9	492	55.4	5.63	36.07	114.9	114.5	113.7	96.9	93.7	96.3	90.8	84.8	92	102.4
A0A1U8ANX6	transcription initiation factor TFIID subunit 15b isoform X1 OS=Nelumbo nucifera OX=4432 GN=LOC104602525 PE=4 SV=1	31	12	16	12	508	48.5	8.75	28.42	90.3	94	94.3	95	97.6	98.2	104.3	100.1	104.7	121.4
A0A1U8AZV0	60S ribosomal protein L18-2-like OS=Nelumbo nucifera OX=4432 GN=LOC104609266 PE=4 SV=1	35	6	15	3	187	20.9	11.27	29.62	107	105.2	106.8	97.2	96.7	98.8	95.7	92.5	94.9	105.3
A0A1U7YXB5	putative GDP-L-fucose synthase 2 OS=Nelumbo nucifera OX=4432 GN=LOC104586963 PE=3 SV=1	34	9	15	8	324	35.8	6.96	39.09	110.7	111.9	114.8	97.2	93	96.9	93.8	90.3	90.4	101.1
A0A1U8AHQ9	transmembrane protein 214-like OS=Nelumbo nucifera OX=4432 GN=LOC104603071 PE=4 SV=1	16	9	12	6	595	65.1	8.66	28.44	170.6	161	172.1	65.1	69.8	66.7	60.3	62.9	62.5	109
A0A1U7ZWF5	pleckstrin homology domain-containing protein 1-like OS=Nelumbo nucifera OX=4432 GN=LOC104596955 PE=4 SV=1	59	8	12	5	143	16.6	8.94	28.75	92.5	92.1	91	108.3	111	107.7	102.3	99.8	96.9	98.3
A0A1U8ABM0	proteasome subunit beta type-2-A-like OS=Nelumbo nucifera OX=4432 GN=LOC104598635 PE=4 SV=1	48	10	21	2	205	22.8	7.11	44.99	97	99.8	107.3	84	87.8	90.5	99.5	115.7	118.5	99.9
A0A1U7Z949	serine-threonine kinase receptor-associated protein-like OS=Nelumbo nucifera OX=4432 GN=LOC104592340 PE=4 SV=1	34	10	12	10	350	38.1	6.14	25.33	122.7	119.1	121.5	89.2	91.6	90.7	89.4	89	88.1	98.8
A0A1U7Z4A3	long chain base biosynthesis protein 1 OS=Nelumbo nucifera OX=4432 GN=LOC104586569 PE=4 SV=1	30	11	13	11	480	52.7	6.74	28.51	101.3	105.3	105.7	101.6	100	97.6	92.9	94.1	98.8	102.5
A0A1U7ZP57	stem-specific protein TSJT1 OS=Nelumbo nucifera OX=4432 GN=LOC104596440 PE=4 SV=1	30	6	12	3	255	27.8	6.15	34.43	131.7	135.9	129.7	94.9	88.7	88.6	73.3	75.3	73.6	108.3
A0A1U8ANH3	acetyl-coenzyme A carboxylase carboxyl transferase subunit alpha, chloroplastic-like OS=Nelumbo nucifera OX=4432 GN=LOC104606040 PE=3 SV=1	18	13	16	9	765	85.1	8.24	26.57	130.1	134.1	130.3	83.2	83.2	84.3	82.1	82.8	83.6	106.3
A0A1U7ZLD9	probable tocopherol cyclase, chloroplastic isoform X1 OS=Nelumbo nucifera OX=4432 GN=LOC104595147 PE=4 SV=1	23	11	18	11	523	58.7	7.28	33.45	111.6	113.8	110.2	92	93.8	95.9	92.7	96.5	90.8	102.7
A0A1U8AC81	cell wall integrity protein scw1 OS=Nelumbo nucifera OX=4432 GN=LOC104599083 PE=4 SV=1	26	7	14	7	327	35.5	6.89	29.54	113.7	113.3	116.8	96.4	96.1	93.5	90	92.4	86.4	101.4
A0A1U8AHY0	malate dehydrogenase [NADP], chloroplastic isoform X1 OS=Nelumbo nucifera OX=4432 GN=LOC104604574 PE=4 SV=1	24	11	16	5	436	47.8	6.21	38.82	94	92.1	93.7	104.7	107.5	100.8	105.2	102.4	100.3	99.3
A0A1U8AFD3	Thioredoxin reductase OS=Nelumbo nucifera OX=4432 GN=LOC104603829 PE=3 SV=1	24	8	10	2	377	40.5	8.09	23.02	103.3	106.4	102	94.4	112.4	107.3	90.2	81.8	103	99.2
A0A1U8AP63	acetylglutamate kinase, chloroplastic isoform X1 OS=Nelumbo nucifera OX=4432 GN=LOC104602394 PE=3 SV=1	25	8	11	8	390	41.2	9.44	29.59	111.4	109.9	107.9	95	101	91.7	89.2	92.9	92.7	108.4
A0A1U7ZF68	probable cinnamyl alcohol dehydrogenase 1 OS=Nelumbo nucifera OX=4432 GN=LOC104589479 PE=4 SV=1	47	5	10	5	143	15.7	6.51	29.74	110.1	109.1	112.2	97.1	98.7	97.3	90.1	87.7	92.8	104.9
A0A1U8A689	zinc finger CCCH domain-containing protein 40-like OS=Nelumbo nucifera OX=4432 GN=LOC104601197 PE=4 SV=1	31	10	11	10	472	53	7.39	23.08	109.1	109	106.2	96	98.7	99.7	94.3	95.1	93.3	98.7
A0A1U8AT37	SKP1-like protein 1B OS=Nelumbo nucifera OX=4432 GN=LOC104603641 PE=3 SV=1	58	11	13	8	154	17.5	4.7	25.67	130	124.9	122.6	91.4	88	87.9	82.3	79	88.5	105.2
A0A1U8A4A0	flavonoid 3'-monooxygenase OS=Nelumbo nucifera OX=4432 GN=LOC104598992 PE=3 SV=1	21	9	10	8	513	56.4	8.4	23.7	173	168.6	171.9	64.9	65.6	67.1	58.7	58.9	60.7	110.5
A0A1U8ARL0	SAL1 phosphatase-like OS=Nelumbo nucifera OX=4432 GN=LOC104606715 PE=4 SV=1	26	8	19	8	394	41.7	6.04	44.09	91.3	93.7	93.6	102.1	103.7	102.5	104.5	105.5	102.8	100.2
A0A1U8AJ50	uncharacterized protein LOC104600766 OS=Nelumbo nucifera OX=4432 GN=LOC104600766 PE=4 SV=1	38	9	13	9	304	34.4	8.06	23.09	99.6	98.1	97.1	98.1	98.5	100.7	107	103.1	99.9	97.8
A0A1U8AS47	uncharacterized protein LOC104605933 OS=Nelumbo nucifera OX=4432 GN=LOC104605933 PE=3 SV=1	22	5	12	5	237	26.1	8.46	31.82	97.3	95.2	95.6	103.6	101.5	103	100	103.4	101.7	98.9
A0A1U8AE42	Histone H2B OS=Nelumbo nucifera OX=4432 GN=LOC104599285 PE=3 SV=1	54	9	26	1	154	17	10.02	57.67	119.4	116.8	123.6	89.5	87.1	86.5	96	91.5	97.2	92.3
A0A1U7ZCR0	V-type proton ATPase subunit H OS=Nelumbo nucifera OX=4432 GN=LOC104593320 PE=3 SV=1	24	11	13	11	452	51.6	7.49	31.1	109.2	111.6	108.3	100	102.8	97.2	85.7	93.5	92.1	99.6
A0A1U8AEB0	zinc finger CCCH domain-containing protein 14-like OS=Nelumbo nucifera OX=4432 GN=LOC104603535 PE=4 SV=1	34	8	13	4	305	32	9.26	40.17	102.6	106.7	95.1	98.8	93.9	98.8	99.2	97.1	97.2	110.6
A0A1U8B7Q7	26S proteasome non-ATPase regulatory subunit 14 homolog OS=Nelumbo nucifera OX=4432 GN=LOC104610605 PE=4 SV=1	28	8	17	1	308	34.5	6.67	45.32	113.1	132.8	97.2	90.9	124.2	88.2	83.4	75.2	94	100.9
A0A1U8AQC5	40S ribosomal protein S9-2-like OS=Nelumbo nucifera OX=4432 GN=LOC104606388 PE=3 SV=1	41	10	20	1	197	23	10.32	49.66	101.1	100.9	107.3	100.9	98.5	95.6	106.1	103.5	88.3	97.7
A0A1U8BJN1	multiprotein-bridging factor 1b OS=Nelumbo nucifera OX=4432 GN=LOC104611571 PE=4 SV=1	54	7	14	5	142	15.6	10.04	40.01	111.3	116	113.5	94.7	93	94.1	93.9	89.9	92	101.5
A0A1U7ZAV2	Glucose-6-phosphate 1-dehydrogenase OS=Nelumbo nucifera OX=4432 GN=LOC104592835 PE=3 SV=1	21	11	13	7	600	68.1	8.53	33.72	157.4	152.6	155.9	78.8	74	76.7	60.4	64.5	69.9	109.8
A0A1U8BBN6	uncharacterized protein LOC104609100 OS=Nelumbo nucifera OX=4432 GN=LOC104609100 PE=4 SV=1	55	5	16	5	100	10.7	9.41	36.68	65.5	65	67	100.6	106.6	103.7	134	131.4	129.7	96.5
A0A1U8AEH0	D-3-phosphoglycerate dehydrogenase OS=Nelumbo nucifera OX=4432 GN=LOC104603133 PE=3 SV=1	18	9	14	7	634	67.1	6.8	31.04	130.5	133.6	131.9	80.1	84.3	83.3	72.7	80.5	90.5	112.6
A0A1U8BER5	protein transport protein Sec24-like At3g07100 OS=Nelumbo nucifera OX=4432 GN=LOC104610113 PE=4 SV=1	13	11	14	6	996	109.8	7.87	33.7	101.2	107.3	98.7	101.1	99.4	102	97.4	92.4	97.2	103.3
A0A1U8AJS6	plant UBX domain-containing protein 10-like OS=Nelumbo nucifera OX=4432 GN=LOC104604720 PE=4 SV=1	19	8	11	8	489	53.8	5.16	26.19	88.4	94	90.7	106.1	103	104.7	108.8	102.8	99.8	101.7
A0A1U7ZYE3	serine/arginine-rich splicing factor SR34B-like isoform X1 OS=Nelumbo nucifera OX=4432 GN=LOC104598953 PE=4 SV=1	32	9	17	9	313	35.2	11.3	35.53	58.3	61.5	57.8	113.5	118.3	120	130.9	124.1	123.1	92.4
A0A1U7YRR0	60S ribosomal protein L27a-3-like OS=Nelumbo nucifera OX=4432 GN=LOC104586225 PE=3 SV=1	48	8	19	3	146	16.4	10.49	42.98	107.4	104.6	104.6	97.8	101.4	98.9	95.4	96.6	94.8	98.4
A0A1U7ZC59	topless-related protein 2-like isoform X1 OS=Nelumbo nucifera OX=4432 GN=LOC104588998 PE=4 SV=1	12	14	16	1	1129	124.5	7.08	34.2	103.7	102.3	97.2	122.1	99.1	102.1	90.2	82.1	102.7	98.6
A0A1U7ZX12	uncharacterized protein LOC104594485 isoform X1 OS=Nelumbo nucifera OX=4432 GN=LOC104594485 PE=3 SV=1	29	7	10	7	232	25.7	8.9	29.34	101.5	99.8	101.5	98.4	99.7	101.7	97.8	103.4	96	100.1
A0A1U8BDP4	heme-binding protein 2-like OS=Nelumbo nucifera OX=4432 GN=LOC104610018 PE=4 SV=1	43	6	25	6	227	25.1	4.86	63.59	51	57.6	52.3	115.9	114.3	114.8	128.3	133.1	139.2	93.4
A0A1U8AQZ6	protein TIC 22, chloroplastic OS=Nelumbo nucifera OX=4432 GN=LOC104606531 PE=4 SV=1	22	5	8	5	292	32.4	8.68	22.86	90.2	84.1	85.5	104.1	110.3	107.3	109.1	102.2	104.3	102.9
A0A1U7Z486	tyrosine--tRNA ligase 1, cytoplasmic-like OS=Nelumbo nucifera OX=4432 GN=LOC104589077 PE=3 SV=1	29	10	16	10	387	44.3	7.02	36.32	100	102.7	93.3	99.1	105.3	102.5	101.2	99.3	97.8	98.7
A0A1U8ADI5	protein CYPRO4-like OS=Nelumbo nucifera OX=4432 GN=LOC104601790 PE=4 SV=1	23	13	13	9	633	70.9	6.38	29.73	104.2	106.9	101.2	94.7	99.4	94.6	98.4	99.7	100.3	100.6
A0A1U7Z9I8	acetylornithine aminotransferase, mitochondrial-like OS=Nelumbo nucifera OX=4432 GN=LOC104591846 PE=3 SV=1	27	9	11	9	466	50.2	7.2	29.5	144.4	142.1	149.2	80.7	82.4	81.1	70	74.1	72.5	103.7
A0A1U7ZBG4	CSC1-like protein ERD4 OS=Nelumbo nucifera OX=4432 GN=LOC104588785 PE=4 SV=1	21	14	16	14	724	81.4	9.25	33.8	61.6	62.6	64.1	119.4	120.4	119.2	121.4	117	118.1	96.3
A0A1U7Z4X2	40S ribosomal protein S9-2 OS=Nelumbo nucifera OX=4432 GN=LOC104586778 PE=3 SV=1	41	10	20	1	197	23	10.27	49.34	105.5	102.9	106.8	95.1	97	96.9	100.1	99.9	97.4	98.4
A0A1U8AEP7	coproporphyrinogen-III oxidase 1, chloroplastic OS=Nelumbo nucifera OX=4432 GN=LOC104599771 PE=4 SV=1	29	10	16	10	398	44.6	6.8	28.97	126.5	124.4	125	84.5	90.6	87.6	83.3	89.8	84.4	103.8
A0A1U7Z7Z1	binding partner of ACD11 1-like OS=Nelumbo nucifera OX=4432 GN=LOC104587276 PE=4 SV=1	28	7	12	5	279	29.9	5.43	31.51	129	124.7	131.8	88.5	89.4	89.6	84.6	79.1	79.3	104
A0A1U7ZT05	uncharacterized protein LOC104597543 OS=Nelumbo nucifera OX=4432 GN=LOC104597543 PE=3 SV=1	39	10	13	8	290	30.9	8.85	28.02	105.5	106.3	106	96.1	102.8	99.2	97.2	94.5	95.1	97.2
A0A1U7ZRB6	Formate dehydrogenase, mitochondrial OS=Nelumbo nucifera OX=4432 GN=LOC104593213 PE=3 SV=1	30	9	16	9	384	42.4	7.36	37.23	100.7	97.8	98.3	105.3	101.6	101.7	98.7	98.6	98.8	98.4
A0A1U7Z965	glutathione transferase GST 23-like OS=Nelumbo nucifera OX=4432 GN=LOC104587640 PE=4 SV=1	29	7	21	7	221	25.8	7.65	54.67	89.9	93.5	92.2	105.3	106.7	107.6	104.2	106.8	99.7	94.1
A0A1U7ZR02	uncharacterized protein At2g34160-like OS=Nelumbo nucifera OX=4432 GN=LOC104595368 PE=4 SV=1	33	6	12	1	129	14.4	5.35	38.8	100.1	100.9	96.9	97.9	102.5	99.2	92.2	103.4	101.2	105.9
A0A1U8Q7W3	Nascent polypeptide-associated complex subunit beta OS=Nelumbo nucifera OX=4432 GN=LOC104606693 PE=3 SV=1	67	7	12	2	173	18.8	9.23	31.76	108	108	107.5	93.9	95.4	99.2	97.6	96.8	93.1	100.5
A0A1U7ZM40	mitochondrial import receptor subunit TOM20-like OS=Nelumbo nucifera OX=4432 GN=LOC104591713 PE=4 SV=1	42	8	13	6	203	22.7	6.61	27.45	80.5	95.2	85.7	102.1	98.2	98	100.4	115	122.1	102.7
A0A1U8BD18	Pyruvate kinase OS=Nelumbo nucifera OX=4432 GN=LOC104613264 PE=3 SV=1	18	8	10	8	584	64.3	6.05	22.75	171.9	170.4	173	62.6	63.9	63	61	67.1	62.5	104.5
A0A1U7Z3S5	Alpha-mannosidase OS=Nelumbo nucifera OX=4432 GN=LOC104590020 PE=3 SV=1	11	8	12	8	1011	113.9	5.96	27.05	110.2	107.8	111.9	97.8	98.2	96.1	90.9	94.6	93.1	99.3
D3WC68	Photosystem II CP47 reaction center protein OS=Nelumbo nucifera OX=4432 GN=psbB PE=3 SV=1	19	7	13	7	508	56.1	6.77	28.45	150.9	148.9	156.1	70.6	72.9	71.7	71.4	75.2	74.2	108
A0A1U7YPT9	nuclear pore complex protein NUP98A-like isoform X1 OS=Nelumbo nucifera OX=4432 GN=LOC104585600 PE=4 SV=1	12	10	15	10	990	101.8	8.28	28.01	103.3	100.6	106.6	101.6	98.4	91.5	95.6	96.2	104.9	101.4
A0A1U7ZJH4	Proline iminopeptidase OS=Nelumbo nucifera OX=4432 GN=LOC104591378 PE=3 SV=1	29	11	13	11	428	48.3	7.37	31.04	99.7	99.2	101.4	98.1	97.2	101	102.3	101.2	97	102.9
A0A1U8A8Y2	60S ribosomal protein L18a OS=Nelumbo nucifera OX=4432 GN=LOC104601469 PE=3 SV=1	40	7	23	7	178	21.2	10.42	56.54	93.9	96	92.1	97.6	103.5	97.7	106.9	106.9	105.6	99.8
A0A1U7ZB64	dihydrolipoyllysine-residue succinyltransferase component of 2-oxoglutarate dehydrogenase complex 2, mitochondrial-like isoform X1 OS=Nelumbo nucifera OX=4432 GN=LOC104588306 PE=4 SV=1	17	9	15	2	531	57.8	8.98	28.41	109.5	105	113.9	97	86.2	96.1	96	93.6	97.4	105.4
A0A1U8B9C2	ATP phosphoribosyltransferase 1, chloroplastic-like OS=Nelumbo nucifera OX=4432 GN=LOC104611048 PE=4 SV=1	25	8	13	8	401	44.2	7.05	31.49	99.3	96.6	98.1	101.5	106.5	98.8	100.7	102.1	100.5	95.9
D3WCA4	30S ribosomal protein S3, chloroplastic OS=Nelumbo nucifera OX=4432 GN=rps3 PE=3 SV=1	32	8	12	8	218	25.1	9.7	31.21	97.4	99.5	96.7	104.8	106.1	105.8	98	95.3	96.2	100.2
A0A1U7YR51	copper transport protein ATX1-like OS=Nelumbo nucifera OX=4432 GN=LOC104586914 PE=4 SV=1	51	5	16	5	90	9.7	5.48	45.96	119	110.6	113.4	94.5	98.2	94.8	90	88.2	88.2	103
A0A1U7ZD44	Transcription elongation factor SPT5 OS=Nelumbo nucifera OX=4432 GN=LOC104589274 PE=3 SV=1	11	9	10	9	1037	115.2	5.36	23.2	101.4	98.2	100.1	98.2	96.7	103.1	96.3	102.2	100.6	103.3
A0A1U7ZN72	3-hydroxy-3-methylglutaryl coenzyme A synthase OS=Nelumbo nucifera OX=4432 GN=LOC104596203 PE=3 SV=1	24	10	20	4	475	52.5	6.83	37.2	159	155.1	153.8	72.6	76	71	67	69.7	67.8	108
A0A1U7ZQI0	28 kDa ribonucleoprotein, chloroplastic-like OS=Nelumbo nucifera OX=4432 GN=LOC104593034 PE=4 SV=1	27	8	26	5	330	36.5	4.61	41.38	106.6	105.4	102.2	93.3	100.4	104	93.4	89.2	102.8	102.8
A0A1U8AKY7	ATP-dependent Clp protease proteolytic subunit OS=Nelumbo nucifera OX=4432 GN=LOC104605069 PE=3 SV=1	23	5	11	5	292	31.9	8.27	27.17	105.7	104	102.7	100.4	103.2	100.9	92.6	96.8	94.3	99.5
A0A1U8AIQ8	serine/threonine protein phosphatase 2A regulatory subunit B''beta-like OS=Nelumbo nucifera OX=4432 GN=LOC104600907 PE=4 SV=1	21	10	13	5	539	62.2	4.89	30.5	104.1	103.1	105	100.6	102.6	100.4	93	96.3	94.7	100.2
A0A1U7ZZE4	probable cytosolic oligopeptidase A OS=Nelumbo nucifera OX=4432 GN=LOC104595555 PE=3 SV=1	11	9	15	3	792	89.4	6.55	37.84	96.5	97.6	93.7	97.3	98.9	107.9	113.2	98	100.1	96.8
A0A1U7ZI00	putative MO25-like protein At5g47540 isoform X1 OS=Nelumbo nucifera OX=4432 GN=LOC104594189 PE=4 SV=1	24	7	11	5	347	40.3	7.11	23.8	93.1	93	90.6	103.3	102.2	105.1	104.7	100.7	110.6	96.7
A0A1U7ZTM5	Phosphomannomutase OS=Nelumbo nucifera OX=4432 GN=LOC104596126 PE=3 SV=1	51	11	13	11	252	28.4	6.35	29.73	113.2	111.1	116.7	91.4	93.4	95.8	92.7	93.5	89.5	102.7
A0A1U7ZF04	Cytochrome b-c1 complex subunit 7 OS=Nelumbo nucifera OX=4432 GN=LOC104592346 PE=3 SV=1	50	5	11	1	123	14.6	9.52	30.61	95.2	95.4	89	107.7	97.8	95.7	104.3	109.9	102.7	102.2
A0A1U7ZLU4	Inositol-1-monophosphatase OS=Nelumbo nucifera OX=4432 GN=LOC104594191 PE=3 SV=1	30	8	11	7	272	29.5	5.66	26.2	113.9	112.8	112.7	100.2	90.8	88	91.7	92.3	95	102.7
A0A1U7Z4Y2	protein CROWDED NUCLEI 4 OS=Nelumbo nucifera OX=4432 GN=LOC104591220 PE=4 SV=1	14	16	16	15	1090	125.9	5.48	31.71	118.7	117.7	115.8	91.8	90.9	93.8	86.1	92.7	87.9	104.7
A0A1U8ADG2	probable protein phosphatase 2C 60 isoform X2 OS=Nelumbo nucifera OX=4432 GN=LOC104603253 PE=3 SV=1	27	10	14	3	369	40.6	5.26	32.66	90.9	92.5	92	99.5	103.4	101.2	105.9	107.6	109.2	97.9
A0A1U7ZQE1	probable calcium-binding protein CML13 OS=Nelumbo nucifera OX=4432 GN=LOC104596241 PE=4 SV=1	62	9	14	3	147	16.6	4.96	35.89	133.5	151	124.6	77.7	90.6	79.8	73.5	81.7	79.6	108
A0A1U8ARQ1	3-dehydroquinate synthase, chloroplastic-like OS=Nelumbo nucifera OX=4432 GN=LOC104606748 PE=3 SV=1	30	12	16	7	457	49.7	7.9	32.98	117.3	121	122	93	93.7	92.7	86.8	87.1	84.8	101.8
A0A1U7Z5V5	WD-40 repeat-containing protein MSI4-like OS=Nelumbo nucifera OX=4432 GN=LOC104586625 PE=4 SV=1	24	9	11	5	465	51.2	6.13	27.26	101.3	100.4	106.2	92.4	99.6	96.4	97.9	103.6	100.5	101.9
A0A1U8A6V8	insulin-degrading enzyme-like 1, peroxisomal OS=Nelumbo nucifera OX=4432 GN=LOC104597374 PE=3 SV=1	15	15	17	15	967	111.2	6.3	33.37	119.6	136.8	116.8	88.2	85.2	89.9	82.1	82.5	99.5	99.5
A0A1U7ZBK9	uncharacterized protein At2g34160-like OS=Nelumbo nucifera OX=4432 GN=LOC104592401 PE=4 SV=1	33	6	11	1	129	14.4	5.35	36.46	108.4	103.1	107.8	94	95.2	96.7	96.5	102.2	97.6	98.4
A0A1U8B138	V-type proton ATPase subunit OS=Nelumbo nucifera OX=4432 GN=LOC104609755 PE=3 SV=1	23	8	10	8	351	40.5	5.06	28.7	109.8	107.3	106.7	95	99.7	99.6	96	95.2	89.4	101.2
A0A1U8AEY2	apoptosis inhibitor 5-like protein API5 isoform X1 OS=Nelumbo nucifera OX=4432 GN=LOC104599524 PE=4 SV=1	22	12	17	4	556	61.9	8.56	26.28	98.7	112.5	103.7	96	91	97	91.7	102.1	111.1	96.3
A0A1U7ZBQ1	Proteasome subunit beta OS=Nelumbo nucifera OX=4432 GN=LOC104593036 PE=3 SV=1	32	7	15	7	274	29.6	6.84	33.64	101.6	98.5	95	99.4	98.9	99	104.1	102.7	100	100.7
A0A1U8AAR3	gamma-interferon-inducible lysosomal thiol reductase isoform X1 OS=Nelumbo nucifera OX=4432 GN=LOC104602527 PE=4 SV=1	22	5	15	5	258	28.9	6.76	45.03	101.7	100.5	102.4	98.8	99.7	97.4	97.7	98.8	102	100.9
A0A1U8BAL0	Citrate synthase OS=Nelumbo nucifera OX=4432 GN=LOC104609004 PE=3 SV=1	15	9	19	9	510	56.1	8.48	43.12	135.9	133.7	131	88.6	87.1	85.6	75.1	78.2	77.3	107.4
A0A1U7ZW52	Nascent polypeptide-associated complex subunit beta OS=Nelumbo nucifera OX=4432 GN=LOC104596832 PE=3 SV=1	75	7	13	1	155	16.9	8.37	32.76
A0A1U8ADY9	ubiquitin receptor RAD23c-like OS=Nelumbo nucifera OX=4432 GN=LOC104602977 PE=4 SV=1	28	8	14	2	383	40.8	4.91	37.25	109.6	111.4	113.1	110.5	103	96.7	85.2	81.3	91	98.1
A0A1U7ZJD4	neutral ceramidase-like OS=Nelumbo nucifera OX=4432 GN=LOC104593520 PE=4 SV=1	21	14	16	14	784	86.6	7.36	27.57	97.8	101.3	93.7	100.1	104.7	104.7	101.4	100	96.6	99.5
A0A1U7Z3W9	40S ribosomal protein S25-2-like OS=Nelumbo nucifera OX=4432 GN=LOC104586441 PE=4 SV=1	42	6	23	6	108	12	10.59	44.5	101	103.1	104.9	93.5	93.5	94	107.4	101.4	103.5	97.6
A0A1U7ZV60	40S ribosomal protein S18-like OS=Nelumbo nucifera OX=4432 GN=LOC104596533 PE=3 SV=1	43	8	19	1	152	17.6	10.64	37.53	103.9	102	106	93.8	95.9	95.4	100.1	100.1	101.4	101.4
A0A1U8AN87	S-(hydroxymethyl)glutathione dehydrogenase OS=Nelumbo nucifera OX=4432 GN=LOC104602100 PE=3 SV=1	25	6	14	3	379	40.8	6.67	39.26	124.5	123.7	116.9	95.5	90	93	80.1	97.4	88.7	89.9
A0A1U8B2M6	regulator of nonsense transcripts 1 homolog OS=Nelumbo nucifera OX=4432 GN=LOC104606417 PE=4 SV=1	13	12	12	2	1274	139.4	6.8	27.74	116.2	114.6	112.8	96	95.1	96.7	86.9	89.8	89.8	102.1
A0A1U8BDS4	uncharacterized GPI-anchored protein At3g06035 OS=Nelumbo nucifera OX=4432 GN=LOC104612379 PE=4 SV=1	13	3	15	3	204	21.9	6.18	35.56	77.9	78.9	75.6	112.5	113.5	115.8	108.3	105.7	110	101.7
A0A1U7Z8F7	Obg-like ATPase 1 OS=Nelumbo nucifera OX=4432 GN=LOC104587870 PE=3 SV=1	28	9	12	9	425	46.4	6.89	27.94	96.1	94.7	98	102.2	103	104.4	98.8	101.8	103.4	97.7
A0A1U8B8I3	cleavage and polyadenylation specificity factor subunit 1 OS=Nelumbo nucifera OX=4432 GN=LOC104611855 PE=4 SV=1	10	13	16	13	1457	159.7	6.29	32.59	105.8	109.1	108.4	98.6	97.9	99.7	93.8	88.8	91.5	106.5
A0A1U8A7W8	17.3 kDa class I heat shock protein OS=Nelumbo nucifera OX=4432 GN=LOC104601155 PE=3 SV=1	37	7	17	7	164	18.9	8.35	34.7	88.3	88.4	88.4	114.7	113.4	113	94.3	103.5	98.4	97.7
A0A1U7Z5K0	histone H2B.9-like OS=Nelumbo nucifera OX=4432 GN=LOC104591431 PE=3 SV=1	53	8	26	2	136	15	10.15	60.24	37.1	37.4	34	127	119.4	119.3	147.9	143.5	140.4	94.1
A0A1U7YRH4	probable sucrose-phosphate synthase 1 OS=Nelumbo nucifera OX=4432 GN=LOC104586143 PE=3 SV=1	10	12	15	3	1063	119.2	6.49	37.87	120.2	136.5	104	88.3	96.8	93.4	78.3	91.6	80.6	110.3
A0A1U8BBX5	branched-chain-amino-acid aminotransferase-like protein 1 isoform X1 OS=Nelumbo nucifera OX=4432 GN=LOC104612934 PE=4 SV=1	17	9	12	9	582	64.9	7.68	29.6	111	109.7	110.3	92	97.6	96.1	91.1	93.6	96.8	101.8
A0A1U8AZ70	non-functional NADPH-dependent codeinone reductase 2-like OS=Nelumbo nucifera OX=4432 GN=LOC104607965 PE=4 SV=1	37	11	14	10	321	36	5.9	32.99	99.8	102.1	102.4	99.1	99.4	104.7	96.7	96.2	97.3	102.3
A0A1U7ZRY8	protein ABHD11 OS=Nelumbo nucifera OX=4432 GN=LOC104596699 PE=4 SV=1	15	7	152	2	409	45.6	7.12	299.8	89.5	90.2	91.6	110.1	100.4	112.2	104.6	104.9	100.2	96.5
A0A1U7Z7C3	Cytochrome b-c1 complex subunit Rieske, mitochondrial OS=Nelumbo nucifera OX=4432 GN=LOC104591870 PE=4 SV=1	27	7	10	4	272	29.8	8.87	25.97	96.3	94.2	96.9	97	99.1	103	101.9	103.8	107.8	100
A0A1U7Z2U6	uncharacterized protein LOC104588660 isoform X1 OS=Nelumbo nucifera OX=4432 GN=LOC104588660 PE=4 SV=1	8	11	12	11	1415	153.1	4.63	25.23	102.3	108.9	103.4	96.5	104	97.1	92.8	92.9	99.6	102.5
A0A1U7Z753	long chain acyl-CoA synthetase 9, chloroplastic OS=Nelumbo nucifera OX=4432 GN=LOC104587046 PE=4 SV=1	19	10	13	9	698	76.5	7.12	23.71	118.7	117.4	116.6	96.6	90.2	93.4	83.4	90.6	89.5	103.6
A0A1U8BD70	lisH domain and HEAT repeat-containing protein KIAA1468 homolog OS=Nelumbo nucifera OX=4432 GN=LOC104613297 PE=4 SV=1	17	15	15	15	1184	132.9	5.3	24.3	103.9	103.1	101.4	103.4	100.3	102.2	93.1	97.2	92.4	103
A0A1U8A0Q3	ubiquinone biosynthesis protein COQ9-B, mitochondrial-like OS=Nelumbo nucifera OX=4432 GN=LOC104599076 PE=4 SV=1	27	8	14	8	314	35.2	6.54	30.67	97.4	91.2	93.7	109.7	105.9	106.2	100.2	100.3	95.3	100.1
A0A1U7ZRX1	V-type proton ATPase subunit E OS=Nelumbo nucifera OX=4432 GN=LOC104593422 PE=3 SV=1	34	9	17	5	230	26.4	7.87	31.51	101.1	97.8	99.5	108.5	107.7	110.2	95.5	94.5	87.9	97.2
A0A1U8AVE5	Lactoylglutathione lyase OS=Nelumbo nucifera OX=4432 GN=LOC104604519 PE=3 SV=1	36	9	15	9	230	26.3	8	35.14	108.9	107.9	106.1	99.4	98.9	97.5	94.8	93.8	92.3	100.3
A0A1U8A5V6	ras-related protein Rab11C OS=Nelumbo nucifera OX=4432 GN=LOC104597069 PE=4 SV=1	43	10	14	1	217	24	6.68	36.09	114.8	114.6	111.6	94.4	99	95.4	85.4	90.5	92	102.2
A0A1U8Q736	Phosphotransferase OS=Nelumbo nucifera OX=4432 GN=LOC104605346 PE=3 SV=1	24	9	10	8	491	53.3	5.73	20.95	124.8	125.6	115	91.8	88.2	93.4	85.5	83.2	85.3	107.1
A0A1U8ACX8	Protein transport protein Sec61 subunit beta OS=Nelumbo nucifera OX=4432 GN=LOC104602655 PE=3 SV=1	62	4	11	3	107	10.6	11.65	28.88	118.3	129.2	111.8	86.3	89.8	92.5	88.5	87.6	88.5	107.4
A0A1U8B320	GrpE protein homolog OS=Nelumbo nucifera OX=4432 GN=LOC104606523 PE=3 SV=1	20	7	11	4	337	37.4	6.64	28.59	95.3	99.6	92.8	99	103.2	99.4	108.2	104.4	101.5	96.7
A0A1U7ZU54	Serine/threonine-protein phosphatase OS=Nelumbo nucifera OX=4432 GN=LOC104596284 PE=3 SV=1	38	8	13	1	306	35	5.01	21.46	96.2	97.5	96.1	101	106.7	105	96.7	101	96.8	102.9
A0A1U7ZNS3	4-hydroxy-3-methylbut-2-enyl diphosphate reductase, chloroplastic OS=Nelumbo nucifera OX=4432 GN=LOC104595783 PE=3 SV=1	23	10	11	10	462	52	5.36	27.27	139.4	151.4	133.4	81.9	87.6	82	73.8	72.8	70.6	107.1
A0A1U7ZNR4	phospholipase A-2-activating protein isoform X1 OS=Nelumbo nucifera OX=4432 GN=LOC104595776 PE=4 SV=1	15	9	11	9	760	84.1	5.81	21.3	111.4	112.8	113.3	93.7	96.9	93.9	87.9	92.7	91	106.4
A0A1U7Z6C3	uncharacterized protein LOC104587226 OS=Nelumbo nucifera OX=4432 GN=LOC104587226 PE=4 SV=1	12	10	11	10	1034	111.6	5.41	26.4	108.3	129.4	107	88	91.3	92.4	89.5	90	104.9	99.2
A0A1U8AL54	nudix hydrolase 3 OS=Nelumbo nucifera OX=4432 GN=LOC104605414 PE=4 SV=1	19	13	14	13	781	88.7	5.44	31.85	102.8	106	100.6	99.2	100.5	102.7	94.7	98.1	95.1	100.3
A0A1U8BKQ0	outer envelope pore protein 37, chloroplastic OS=Nelumbo nucifera OX=4432 GN=LOC104612177 PE=4 SV=1	30	8	12	8	321	36.1	8.24	24.06	100.7	108	103.5	101	99	99.1	92.4	93.8	102.6	99.7
A0A1U8AEB7	translocon-associated protein subunit alpha-like OS=Nelumbo nucifera OX=4432 GN=LOC104599341 PE=4 SV=1	15	2	8	2	253	27.4	4.81	24.56	112.2	109.1	101.2	92.7	95.7	94	92.1	102.6	99.9	100.5
A0A1U7ZEI6	uncharacterized protein LOC104589299 OS=Nelumbo nucifera OX=4432 GN=LOC104589299 PE=4 SV=1	22	8	13	8	344	40.2	5.55	32.48	100.4	102.6	102.3	98.1	101.2	103.8	96.4	94.7	96.7	103.8
A0A1U8AE65	allene oxide cyclase, chloroplastic-like OS=Nelumbo nucifera OX=4432 GN=LOC104603032 PE=4 SV=1	27	5	12	5	256	28.2	8.9	32.53	92.4	90.3	93.3	107.4	103	102.4	106.4	105.1	99	100.7
A0A1U8A8F2	soluble inorganic pyrophosphatase isoform X1 OS=Nelumbo nucifera OX=4432 GN=LOC104601833 PE=3 SV=1	40	7	16	5	214	24.4	5.9	24.81	104	105.1	102.9	96.8	99	95.3	100.8	98.5	98.6	99
A0A1U7Z6P9	ras-related protein RABC2a isoform X1 OS=Nelumbo nucifera OX=4432 GN=LOC104587336 PE=4 SV=1	38	6	14	3	209	23.2	7.61	39.48	102.9	112	99.7	96	86.5	97.3	87.4	109.3	106.8	102
A0A1U7YRM5	basic endochitinase-like OS=Nelumbo nucifera OX=4432 GN=LOC104587092 PE=4 SV=1	25	5	14	5	319	33.9	6.49	28.94	96	98.2	95.5	94.3	97.8	98.3	101.6	110.1	109.1	99.1
A0A1U8AVJ1	Serine/threonine-protein phosphatase OS=Nelumbo nucifera OX=4432 GN=LOC104608013 PE=3 SV=1	38	8	13	1	306	35	5.07	21.4
A0A1U8ASY2	polygalacturonase inhibitor 1-like OS=Nelumbo nucifera OX=4432 GN=LOC104603579 PE=4 SV=1	21	4	11	4	279	31.4	8.84	30.49	73.8	76.9	80.2	111.9	112.8	118.1	109.4	111.7	109.5	95.6
A0A1U8AW86	stress-response A/B barrel domain-containing protein HS1 isoform X2 OS=Nelumbo nucifera OX=4432 GN=LOC104607074 PE=4 SV=1	40	5	13	5	109	12.3	5.69	29.09	98.4	95.9	98.4	103.6	101.2	101.4	101.3	102.9	98.8	98.1
A0A1U7ZZ57	40S ribosomal protein S5 OS=Nelumbo nucifera OX=4432 GN=LOC104597654 PE=3 SV=1	31	8	18	8	197	21.9	9.91	50.05	103.3	105.5	103.1	97.3	99	100.5	97.3	96.9	97.4	99.6
A0A1U7ZT50	Non-specific lipid-transfer protein OS=Nelumbo nucifera OX=4432 GN=LOC104593778 PE=3 SV=1	43	6	52	6	120	12.1	8.56	149.83	68	66.7	67.6	111.2	109.9	107.8	122.2	124.2	127.3	95.1
A0A1U7ZXS6	ras-related protein RABF1-like OS=Nelumbo nucifera OX=4432 GN=LOC104595092 PE=4 SV=1	35	6	13	4	201	21.9	6.34	30.76	109.8	115.1	115.9	97	102.8	97.8	83.6	82.7	90.2	105
A0A1U8A6J6	Transmembrane 9 superfamily member OS=Nelumbo nucifera OX=4432 GN=LOC104600720 PE=3 SV=1	18	11	14	8	637	73.4	8.47	29.76	136.4	134.9	137.2	88.6	87.2	89.4	73.1	74.7	72.9	105.6
A0A1U7ZGB3	phosphatidylinositol 3,4,5-trisphosphate 3-phosphatase and protein-tyrosine-phosphatase PTEN2A-like OS=Nelumbo nucifera OX=4432 GN=LOC104589843 PE=4 SV=1	26	12	18	10	596	65.2	5.73	27.47	101.9	108.8	103.5	98.5	99.9	99.8	92.1	97	98.8	99.7
A0A1U8BD37	tryptophan synthase alpha chain OS=Nelumbo nucifera OX=4432 GN=LOC104609565 PE=3 SV=1	26	7	13	4	336	35.5	8.19	16.86	130.5	133.3	127.6	82.2	91.7	84.8	83.2	80.4	84.1	102.1
A0A1U8A4U1	COP9 signalosome complex subunit 5b-like OS=Nelumbo nucifera OX=4432 GN=LOC104599151 PE=4 SV=1	26	7	11	7	363	40.8	5.2	26.91	108.3	109.4	112.8	95.2	97	97.7	91.1	92.4	94.1	102
A0A1U8A6E6	nucleosome assembly protein 14 isoform X1 OS=Nelumbo nucifera OX=4432 GN=LOC104600689 PE=3 SV=1	23	7	10	6	389	44.1	4.44	26.41	107.9	106.2	107.9	90.5	91.4	91.8	101.9	100.9	105	96.5
A0A1U8BFM1	succinate dehydrogenase subunit 5, mitochondrial-like OS=Nelumbo nucifera OX=4432 GN=LOC104610596 PE=4 SV=1	31	6	9	5	243	26.9	8.51	21.62	100.9	104.6	105.6	90.6	97.9	95.9	96.5	96.5	109.9	101.5
A0A1U8AKC1	multiple organellar RNA editing factor 3, mitochondrial OS=Nelumbo nucifera OX=4432 GN=LOC104605200 PE=4 SV=1	23	8	17	8	428	48.7	8.53	34.4	93.2	90.7	91.3	105.3	103.8	104.9	106.5	102.1	103	99.2
A0A1U7YZC5	40S ribosomal protein S23 OS=Nelumbo nucifera OX=4432 GN=LOC104588658 PE=3 SV=1	46	6	21	6	142	15.7	10.45	42.7	102	100.7	100.9	97.9	99.9	100	101.6	99.3	101.7	96
A0A1U8A264	Ribosomal protein L15 OS=Nelumbo nucifera OX=4432 GN=LOC104598472 PE=3 SV=1	40	8	21	8	204	24.3	11.33	49.7	101.3	96.5	99.8	94	97.6	93	103.6	108.5	101.9	103.7
A0A1U8B309	EH domain-containing protein 1 OS=Nelumbo nucifera OX=4432 GN=LOC104606517 PE=3 SV=1	22	11	13	11	544	61.2	7.37	20.15	117.8	116	119.7	91.8	86.6	92.1	88.9	88	94.4	104.6
A0A1U7ZAX8	zinc finger CCCH domain-containing protein 20 OS=Nelumbo nucifera OX=4432 GN=LOC104588228 PE=4 SV=1	19	6	12	5	391	42.9	7.75	21.23	64.1	67.6	64.9	112.9	120.1	113.7	124.5	120.5	115.6	96.1
A0A1U7Z6N6	Histone H2B OS=Nelumbo nucifera OX=4432 GN=LOC104587324 PE=3 SV=1	47	9	28	2	144	16	10.02	62.9	114.2	108.4	110.4	92.4	93.8	92.9	100.4	98.8	95.1	93.6
A0A1U8B2E4	peroxisomal and mitochondrial division factor 2-like OS=Nelumbo nucifera OX=4432 GN=LOC104608954 PE=4 SV=1	19	9	13	9	352	39.8	4.94	35.39	112.6	123.2	112.1	96.2	93.6	93.8	92.8	86.8	87.4	101.5
A0A1U8QAC5	neurofilament heavy polypeptide-like OS=Nelumbo nucifera OX=4432 GN=LOC104610712 PE=4 SV=1	12	12	13	9	923	99.9	8.21	27.24	115.7	117.2	113.1	95.4	91.7	93.8	85.8	89.9	92.5	104.8
A0A1U8B588	Terpene cyclase/mutase family member OS=Nelumbo nucifera OX=4432 GN=LOC104607389 PE=3 SV=1	18	12	16	10	758	86.6	6.62	33.26	106.7	110	102.9	97.2	101.6	99.6	90.2	98.1	91.7	102.1
A0A1U7ZA00	indole-3-glycerol phosphate synthase, chloroplastic-like OS=Nelumbo nucifera OX=4432 GN=LOC104587894 PE=3 SV=1	27	10	15	7	396	43.8	7.77	32.62	126.3	122.6	126.9	88.3	89.6	89.2	86.7	85.5	84.1	100.7
A0A1U8AHJ5	stress-response A/B barrel domain-containing protein UP3-like OS=Nelumbo nucifera OX=4432 GN=LOC104600589 PE=4 SV=1	29	6	8	6	261	27.9	6.87	24.17	112.2	112.1	112.5	101.5	93.1	97.2	87.5	90.5	88.4	105.1
A0A1U8BG27	Eukaryotic translation initiation factor 5A OS=Nelumbo nucifera OX=4432 GN=LOC104610738 PE=3 SV=1	58	8	30	3	160	17.4	5.99	47.68	103.9	86.2	86.3	99.1	91.5	97	113.6	105.9	107.5	109.1
A0A1U7ZIQ5	asparagine synthetase [glutamine-hydrolyzing] OS=Nelumbo nucifera OX=4432 GN=LOC104594925 PE=4 SV=1	19	10	13	9	589	66.2	6.46	26.19	70.7	74	72.4	110.3	113.3	110.5	116.7	117.2	117.1	97.7
A0A1U7ZR71	50S ribosomal protein L12, chloroplastic-like OS=Nelumbo nucifera OX=4432 GN=LOC104593184 PE=3 SV=1	36	6	13	1	190	20.1	6.06	28.66	86.1	99.7	99.5	100.8	99.9	114.1	114.6	98.7	91.2	95.5
A0A1U7Z4P5	uncharacterized protein At5g48480 OS=Nelumbo nucifera OX=4432 GN=LOC104586280 PE=4 SV=1	24	5	9	5	168	17.5	4.86	20.69	139.4	140.5	147.6	80.9	80.8	82.4	74.2	73.3	80.6	100.3
A0A1U7ZSE4	sulfite reductase [ferredoxin], chloroplastic-like OS=Nelumbo nucifera OX=4432 GN=LOC104597396 PE=4 SV=1	22	12	16	6	645	72.3	8.82	35.79	141.8	142.6	152.5	75.8	76.9	78	79.4	75.1	74.6	103.4
A0A1U8BDD5	protease Do-like 7 isoform X1 OS=Nelumbo nucifera OX=4432 GN=LOC104609922 PE=4 SV=1	13	12	14	12	1129	124.5	6.27	20.14	126.4	131.6	133.4	84.8	88.1	86.1	80.6	85.3	82.4	101.5
A0A1U8BC58	uncharacterized protein LOC104612952 isoform X2 OS=Nelumbo nucifera OX=4432 GN=LOC104612952 PE=4 SV=1	39	7	11	7	229	25.9	9.09	28.39	149	143.5	149.1	78.5	77.3	78.2	74.3	72.2	72	105.9
A0A1U7ZR49	NEDD8-activating enzyme E1 catalytic subunit OS=Nelumbo nucifera OX=4432 GN=LOC104596446 PE=4 SV=1	26	10	12	10	450	49.9	5.47	21.52	108	104.8	104	98.2	98.7	97	89.2	97.4	100.5	102.3
A0A1U8A732	dolichyl-diphosphooligosaccharide--protein glycosyltransferase subunit 2-like OS=Nelumbo nucifera OX=4432 GN=LOC104600894 PE=4 SV=1	15	10	16	7	685	74.5	6.11	34.36	110.3	111.3	111.6	97.3	93.9	96.2	94.3	92.2	94.5	98.5
A0A1U7Z6S3	glycine-rich RNA-binding protein RZ1C isoform X1 OS=Nelumbo nucifera OX=4432 GN=LOC104587359 PE=4 SV=1	39	11	15	7	305	33.3	9.16	25.94	101.7	108	106.4	96.9	99.7	98.3	93.8	92.1	99.2	103.9
A0A1U7YS75	Serine hydroxymethyltransferase OS=Nelumbo nucifera OX=4432 GN=LOC104587242 PE=3 SV=1	14	7	12	7	529	57.1	8.09	29.08	107.8	110.6	107.7	96.6	98.1	104.1	85.4	93	90.7	105.9
A0A1U7YNN4	zinc finger BED domain-containing protein RICESLEEPER 2-like OS=Nelumbo nucifera OX=4432 GN=LOC104586131 PE=4 SV=1	19	11	16	6	675	76.5	6.64	29.96	115.6	114.4	114.3	93.7	92	92.8	86.5	89.3	96	105.4
A0A1U8Q960	uncharacterized protein LOC104605327 OS=Nelumbo nucifera OX=4432 GN=LOC104605327 PE=4 SV=1	16	5	11	5	437	47.5	5.73	20.33	88.9	88.3	84.2	106.6	109.8	106.1	106.2	104.9	101	104
A0A1U7ZWP9	uncharacterized protein LOC104598508 OS=Nelumbo nucifera OX=4432 GN=LOC104598508 PE=4 SV=1	26	9	10	9	454	50.3	6.92	23.69	105.9	99.7	98.3	99.1	102.3	107.3	95.7	100.9	94.2	96.6
A0A1U7ZWA4	protein mago nashi homolog OS=Nelumbo nucifera OX=4432 GN=LOC104598410 PE=4 SV=1	46	7	11	7	150	17.6	6.2	23.2	97	95.1	95.5	104	104.5	103.9	98.9	96.7	102.1	102.4
A0A1U7YQ93	pentatricopeptide repeat-containing protein At3g13160, mitochondrial-like OS=Nelumbo nucifera OX=4432 GN=LOC104585764 PE=4 SV=1	27	10	12	10	380	43.2	8.54	24.14	89.4	98.5	90.9	102.2	105.5	105.8	99.3	99.7	108.1	100.7
A0A1U8A006	Sucrose synthase OS=Nelumbo nucifera OX=4432 GN=LOC104598894 PE=3 SV=1	15	12	18	8	831	95	6.32	36.54	96.9	96.1	100.9	101.5	102.4	96.4	100.4	98.9	101.9	104.7
A0A1U8ARN8	gamma carbonic anhydrase 1, mitochondrial OS=Nelumbo nucifera OX=4432 GN=LOC104603362 PE=4 SV=1	42	9	17	3	271	29.4	6.54	36.33	93.2	103.6	98.8	103.9	106.5	115.5	83.7	96.7	98.4	99.6
A0A1U7Z2Y6	farnesyl pyrophosphate synthase 1-like OS=Nelumbo nucifera OX=4432 GN=LOC104588689 PE=3 SV=1	22	8	11	4	349	40.3	5.72	31.22	121.5	119.2	119.3	91.6	91.8	93.9	80.2	91.2	86.1	105.2
A0A1U7ZHC8	very-long-chain 3-oxoacyl-CoA reductase 1 OS=Nelumbo nucifera OX=4432 GN=LOC104593003 PE=3 SV=1	26	9	16	2	320	35.7	9.61	41.99	104.5	109.4	95.1	104.1	100.3	111.6	93.9	82.4	88.7	110
A0A1U8AP89	vacuolar protein sorting-associated protein 51 homolog OS=Nelumbo nucifera OX=4432 GN=LOC104605083 PE=4 SV=1	15	11	12	11	777	87.9	6.57	32.61	119.2	119.6	119.6	93.5	95.4	94.3	83.7	86.4	84.9	103.4
A0A1U7YYA7	cysteine desulfurase 1, chloroplastic OS=Nelumbo nucifera OX=4432 GN=LOC104588364 PE=4 SV=1	23	9	10	9	469	51.3	6.71	21.75	108.5	100.2	104.8	100.5	95.7	100.9	95.2	94.9	95.6	103.7
A0A1U8BBG4	calcium-dependent protein kinase 2-like OS=Nelumbo nucifera OX=4432 GN=LOC104612808 PE=4 SV=1	21	11	15	3	539	61	7.18	27.63	117.5	121.6	117.6	92.5	93.5	87.3	87.2	88.2	87.8	106.9
A0A1U8AH62	oligouridylate-binding protein 1-like isoform X1 OS=Nelumbo nucifera OX=4432 GN=LOC104600504 PE=4 SV=1	15	5	8	4	423	46	7.25	23.78	113.1	114.9	111.6	90.3	97.6	93.2	91.9	92.8	94.7	99.9
A0A1U8AV93	proteasome-associated protein ECM29 homolog isoform X1 OS=Nelumbo nucifera OX=4432 GN=LOC104607842 PE=4 SV=1	6	11	12	11	1820	201	6.57	25.44	102.1	102.8	101.9	101.6	107.5	109.4	95.5	88.4	92.7	98.1
A0A1U7ZU35	hypersensitive-induced response protein 4-like OS=Nelumbo nucifera OX=4432 GN=LOC104596251 PE=4 SV=1	28	8	12	8	289	32.1	5.43	33	74.1	76.7	76.5	107.7	111.2	114.8	114.3	114.2	112.3	98.2
A0A1U7YW07	Diphosphomevalonate decarboxylase OS=Nelumbo nucifera OX=4432 GN=LOC104588425 PE=3 SV=1	19	8	12	8	421	46.4	6.07	28.17	131.1	134.7	127.1	84.3	87.6	84.6	79.1	82	80.9	108.6
A0A1U8AXE5	legumin B-like OS=Nelumbo nucifera OX=4432 GN=LOC104608590 PE=4 SV=1	20	10	26	8	504	57.2	7.12	57.2	92	87.7	89.4	96.2	93.9	94	116.1	119.9	113.3	97.4
A0A1U8BG23	uncharacterized protein LOC104610735 isoform X1 OS=Nelumbo nucifera OX=4432 GN=LOC104610735 PE=4 SV=1	14	8	8	7	907	96.3	6.14	23.91	105.9	104.4	102.9	105.4	101.1	96.4	99.8	92.3	91.6	100.3
A0A1U7ZIM7	Serine/threonine-protein phosphatase OS=Nelumbo nucifera OX=4432 GN=LOC104590555 PE=3 SV=1	11	9	13	1	1021	108.9	5.96	23.07
A0A1U8AZE1	nucleoid-associated protein At4g30620, chloroplastic-like isoform X1 OS=Nelumbo nucifera OX=4432 GN=LOC104609113 PE=4 SV=1	33	6	9	2	195	21.3	8.65	26.17	79.9	93.4	91.3	105.4	109.2	119.9	107.1	107.3	100.4	86.1
A0A1U8B8M6	uncharacterized protein LOC104608165 OS=Nelumbo nucifera OX=4432 GN=LOC104608165 PE=4 SV=1	14	7	12	7	564	62.1	5.49	28	93.7	90.2	90.7	101.2	106.7	99.8	106.3	108.4	105.8	97.2
A0A1U7Z179	TOM1-like protein 2 OS=Nelumbo nucifera OX=4432 GN=LOC104589986 PE=4 SV=1	30	10	12	10	395	44	4.87	29.04	102	102.5	100	97.3	101.2	98.2	98.8	95.9	101.5	102.5
A0A1U7ZZB6	probable enoyl-CoA hydratase 1, peroxisomal OS=Nelumbo nucifera OX=4432 GN=LOC104598738 PE=4 SV=1	38	9	13	9	265	29.1	7.4	24.29	118.3	120.7	114	96.7	100.2	108.5	74.9	83.3	75.4	108
A0A1U8BMU4	Peroxidase OS=Nelumbo nucifera OX=4432 GN=LOC104612805 PE=3 SV=1	32	9	11	2	331	37.4	8.53	27.84	168	167	162	61.5	69.6	57.5	60.5	61.9	77.6	114.4
A0A1U7ZKV1	ubiquitin-like modifier-activating enzyme 5 isoform X1 OS=Nelumbo nucifera OX=4432 GN=LOC104591724 PE=4 SV=1	22	9	12	9	427	47.2	4.84	25.66	111.3	110.3	108.6	92.1	94.7	94.2	98.4	94	95.7	100.8
A0A1U8AF13	universal stress protein A-like protein OS=Nelumbo nucifera OX=4432 GN=LOC104602257 PE=4 SV=1	38	6	18	5	159	16.9	6.38	45.92	90.2	86.5	89.2	102	102.7	101.8	113.8	105.6	111.9	96.2
A0A1U8AT01	IAA-alanine resistance protein 1 OS=Nelumbo nucifera OX=4432 GN=LOC104607242 PE=4 SV=1	9	6	9	6	493	53.5	6.65	23.93	122.8	122.1	125.5	89.9	90.6	92.8	86.7	86.7	83.2	99.6
A0A1U7ZKS6	uncharacterized protein LOC104591698 OS=Nelumbo nucifera OX=4432 GN=LOC104591698 PE=3 SV=1	20	8	12	8	499	56.5	7.01	26.73	72.1	74	70.7	114.4	113.4	116.1	115	112.2	114.1	98
A0A1U7Z3K6	villin-2-like OS=Nelumbo nucifera OX=4432 GN=LOC104589950 PE=4 SV=1	12	11	13	8	926	102.8	5.27	26.04	113.9	113	111.5	88.7	95.6	92.4	87.8	99	94.4	103.7
A0A1U7ZUI6	glycine-rich RNA-binding protein 3, mitochondrial-like OS=Nelumbo nucifera OX=4432 GN=LOC104597946 PE=4 SV=1	20	3	11	3	288	28.2	4.78	36.3	75.9	80.6	74.6	110.9	102.2	102	112.7	115.1	130.5	95.4
A0A1U7ZTC3	calcium-dependent protein kinase 1-like OS=Nelumbo nucifera OX=4432 GN=LOC104593445 PE=4 SV=1	23	9	14	5	522	58.8	5.91	28.58	97.8	103.3	95.7	105.3	111.8	114.9	85.2	90.2	90.9	104.8
A0A1U7Z9I0	asparagine--tRNA ligase, cytoplasmic 1-like OS=Nelumbo nucifera OX=4432 GN=LOC104588216 PE=3 SV=1	14	8	12	2	569	63.8	6.06	23.92	116.8	102.5	107.7	96.8	96.8	97.1	91.4	95.7	88.5	106.7
A0A1U7ZW94	Nucleoside diphosphate kinase OS=Nelumbo nucifera OX=4432 GN=LOC104598403 PE=3 SV=1	37	6	27	5	148	16.4	7.5	70.12	114.1	114.8	113.5	98.4	96.7	95.7	89.8	86.4	86.5	104
A0A1U7Z603	Glycylpeptide N-tetradecanoyltransferase OS=Nelumbo nucifera OX=4432 GN=LOC104586671 PE=3 SV=1	21	9	11	4	434	49.7	7.27	27.96	107.1	99	101.8	98.3	102.2	96.6	103.8	97.5	96.8	96.9
A0A1U8B9F3	protein FLX-like 1 OS=Nelumbo nucifera OX=4432 GN=LOC104608395 PE=4 SV=1	36	9	14	7	316	34.3	7.36	32.14	102.6	97.5	95.5	100	100.1	101.8	102.5	100.9	101	98
A0A1U8A7G7	protein CROWDED NUCLEI 1-like isoform X1 OS=Nelumbo nucifera OX=4432 GN=LOC104601026 PE=4 SV=1	9	11	12	6	1246	143.1	5.16	22.05	100	96.7	93	103.2	100.5	98.7	101.1	103.1	105.5	98.2
A0A1U7YRT1	RNA polymerase II degradation factor 1 OS=Nelumbo nucifera OX=4432 GN=LOC104587136 PE=4 SV=1	20	10	11	10	560	61.7	6.89	26.3	89	89.4	89.6	99.5	105.2	103.6	103.9	108.1	106.8	104.9
A0A1U7Z6B9	protein STRICTOSIDINE SYNTHASE-LIKE 3-like OS=Nelumbo nucifera OX=4432 GN=LOC104590839 PE=4 SV=1	22	6	8	6	391	43.7	7.2	21.07	116.9	118.8	113.5	93.3	88.4	86	88.4	90.9	101.1	102.6
A0A1U7Z9U2	DEAD-box ATP-dependent RNA helicase 21 OS=Nelumbo nucifera OX=4432 GN=LOC104591903 PE=3 SV=1	16	9	11	9	709	82.2	9.03	26.81	98.2	105	100.1	97.4	102.8	103.4	97.9	97.2	96.7	101.2
A0A1U7Z1F5	Cysteine proteinase inhibitor OS=Nelumbo nucifera OX=4432 GN=LOC104588275 PE=3 SV=1	23	5	12	1	148	16.6	8.31	34.94	105.5	102.4	106.3	96.7	97.6	93.4	99.2	99.9	100.2	98.8
A0A1U7ZZH7	universal stress protein PHOS32 OS=Nelumbo nucifera OX=4432 GN=LOC104598772 PE=4 SV=1	41	7	13	7	164	18.1	5.1	28.37	111.7	108.8	103.5	95.4	98.9	98.1	92.8	93.6	94.1	103.2
A0A1U8AXJ2	dnaJ protein ERDJ3B OS=Nelumbo nucifera OX=4432 GN=LOC104605116 PE=4 SV=1	20	5	10	5	343	38.7	6.74	24.22	115.9	114.8	106.9	92.6	93.1	100.7	94.3	91.6	92.6	97.5
A0A1U8A5R7	Proliferating cell nuclear antigen OS=Nelumbo nucifera OX=4432 GN=LOC104597031 PE=3 SV=1	30	7	11	1	266	29.6	4.75	32.03	114	113.7	113.8	96.9	91.1	95.7	93.6	97.1	84.3	99.8
A0A1U7ZKA9	granule-bound starch synthase 1, chloroplastic/amyloplastic-like OS=Nelumbo nucifera OX=4432 GN=LOC104591200 PE=4 SV=1	66	5	11	5	120	12.3	6.06	24.32	77.3	74.8	74	117	117.5	111.4	109.8	113.9	108.3	96
A0A1U7ZBW6	50S ribosomal protein L3, chloroplastic OS=Nelumbo nucifera OX=4432 GN=LOC104592399 PE=3 SV=1	29	8	12	8	296	32.2	10.56	24.92	98.7	103.5	106.8	96	95.1	97.8	103.3	102.9	96.7	99.1
A0A1U7ZFT8	histidinol dehydrogenase, chloroplastic isoform X1 OS=Nelumbo nucifera OX=4432 GN=LOC104593575 PE=3 SV=1	20	8	10	8	484	52.4	6.61	25.95	111.4	108	104.2	95.5	94.2	96.2	100.2	91.1	99.2	100
A0A1U7YM05	Pectin acetylesterase OS=Nelumbo nucifera OX=4432 GN=LOC104585589 PE=3 SV=1	24	8	12	8	410	45.5	8.06	24.29	84.3	98.3	84.2	108.8	109.6	106.4	102.4	105.7	104.1	96.2
A0A1U7ZR75	nuclear transport factor 2 OS=Nelumbo nucifera OX=4432 GN=LOC104592864 PE=4 SV=1	27	2	10	1	123	13.5	6	28.01	101	113.6	110.9	97.6	92.9	93.7	98	89.9	103.3	99
A0A1U8BG50	STOREKEEPER protein-like OS=Nelumbo nucifera OX=4432 GN=LOC104610761 PE=4 SV=1	24	10	12	9	429	47.7	5.33	21.6	83.3	85	82.5	100.5	105.1	108.6	111.6	112.7	114.1	96.6
A0A1U8AHP7	ATPase family AAA domain-containing protein 3-B OS=Nelumbo nucifera OX=4432 GN=LOC104600386 PE=4 SV=1	19	13	15	5	632	70.4	9.17	37.96	97.9	102.3	95.4	97.4	105.9	101.2	100.4	95.9	100.5	102.9
A0A1U8A6A8	Ribosomal protein L19 OS=Nelumbo nucifera OX=4432 GN=LOC104601211 PE=3 SV=1	35	9	20	3	202	23.7	11.37	40.54	101.3	98.8	100.8	90.7	90.6	90.5	111.2	112	107.6	96.4
A0A1U7ZXJ3	dehydrogenase/reductase SDR family member 7 isoform X1 OS=Nelumbo nucifera OX=4432 GN=LOC104598254 PE=4 SV=1	24	5	8	5	327	35.2	9.26	26.52	98.2	99.5	94.4	101.6	101.6	103.9	104.2	99.2	98.9	98.6
A0A1U8B8J9	4-hydroxy-tetrahydrodipicolinate synthase, chloroplastic-like isoform X1 OS=Nelumbo nucifera OX=4432 GN=LOC104611865 PE=4 SV=1	29	9	13	8	365	39.9	7.09	34.82	110.3	107.2	110.4	94.9	93.2	90.1	96.9	99.7	95.7	101.6
A0A1U8AYA6	bifunctional UDP-glucose 4-epimerase and UDP-xylose 4-epimerase 1 OS=Nelumbo nucifera OX=4432 GN=LOC104608756 PE=3 SV=1	31	9	12	2	351	39.1	7.4	31.39	76.6	84.7	76.6	107	106.6	104.9	113.2	112.6	115.9	101.8
A0A1U7ZQ27	defensin Ec-AMP-D2-like OS=Nelumbo nucifera OX=4432 GN=LOC104592925 PE=3 SV=1	35	3	13	2	78	8.7	9.73	30.28	77.2	90.5	78.9	105.7	110.7	102.2	107.5	113.4	112.6	101.2
A0A1U8A0U8	Glycosyltransferase OS=Nelumbo nucifera OX=4432 GN=LOC104599616 PE=3 SV=1	25	8	15	8	472	53.4	6.8	32.53	129.2	147.6	131.7	83.4	79.4	83.6	79.8	79.7	85.9	99.8
A0A1U7ZZJ3	probable glutamyl endopeptidase, chloroplastic isoform X1 OS=Nelumbo nucifera OX=4432 GN=LOC104598783 PE=4 SV=1	13	9	10	9	964	107.3	5.87	23.86	120.4	121	119	83.4	94.2	91.3	85.9	79.2	96	109.5
A0A1U8AFT0	probable plastid-lipid-associated protein 13, chloroplastic OS=Nelumbo nucifera OX=4432 GN=LOC104603543 PE=4 SV=1	31	8	12	8	307	33.8	5.47	31.27	95.6	97.7	97	107.4	104.4	109.4	98.6	93.3	97.1	99.3
A0A1U7ZGH8	Uridine kinase OS=Nelumbo nucifera OX=4432 GN=LOC104594309 PE=3 SV=1	24	9	10	5	478	53.9	6.33	26.16	104.1	113.4	111.4	91.3	96.6	95.2	94.7	91.4	97.4	104.4
A0A1U8B4Q4	26S proteasome non-ATPase regulatory subunit 9 OS=Nelumbo nucifera OX=4432 GN=LOC104610747 PE=4 SV=1	41	8	9	8	225	24.2	5.43	18.37	84.6	84.3	83.3	105.1	114.6	104.5	106.5	109.2	107.8	100.2
A0A1U8BE07	regulator of nonsense transcripts 1 homolog isoform X1 OS=Nelumbo nucifera OX=4432 GN=LOC104609870 PE=4 SV=1	13	11	11	1	1259	137.6	6.74	23.16	114.2	93.9	121.5	90.1	102.1	103.9	98.1	104.6	73.1	98.5
A0A1U7ZIT0	ribosome-binding factor PSRP1, chloroplastic OS=Nelumbo nucifera OX=4432 GN=LOC104593375 PE=3 SV=1	28	7	11	7	330	36.5	7.56	22.99	86.7	85.6	87	111.7	112.2	118.7	102.2	101.1	98.1	96.7
A0A1U7ZJI5	probable prefoldin subunit 2 OS=Nelumbo nucifera OX=4432 GN=LOC104591394 PE=4 SV=1	52	7	9	7	149	16.8	6.24	25.1	97	103.2	103.7	99.4	101.5	99.4	97.3	95.5	101	102
A0A1U7ZJ24	Chalcone-flavonone isomerase family protein OS=Nelumbo nucifera OX=4432 GN=LOC104594492 PE=3 SV=1	17	2	7	2	212	23.3	4.93	22.51	114.2	119	112.1	98.7	96.9	94.1	88.9	83.1	85.1	107.9
A0A1U7ZC74	protein MEMO1 OS=Nelumbo nucifera OX=4432 GN=LOC104588591 PE=3 SV=1	37	10	12	10	291	32.9	7.27	22.18	90.2	90.2	89.3	104.5	104.9	105.9	105.1	109.2	101.4	99.2
A0A1U8A7W0	60S ribosomal protein L21-2-like OS=Nelumbo nucifera OX=4432 GN=LOC104597618 PE=4 SV=1	38	5	14	1	164	18.8	10.4	39.67
A0A1U7Z8K4	mitochondrial outer membrane protein porin 2-like OS=Nelumbo nucifera OX=4432 GN=LOC104590387 PE=4 SV=1	24	8	13	3	276	29.7	9.23	25.88	84	103	85.5	111.4	119.8	110.9	111.2	88.3	87.2	98.7
A0A1U7ZTS4	COP9 signalosome complex subunit 1 OS=Nelumbo nucifera OX=4432 GN=LOC104596161 PE=4 SV=1	21	9	14	9	440	50.3	6.73	30.33	113.1	113.4	112.9	96.8	97.3	92	87.2	90.2	94.9	102.1
A0A1U7Z4L0	4-hydroxy-4-methyl-2-oxoglutarate aldolase OS=Nelumbo nucifera OX=4432 GN=LOC104591079 PE=3 SV=1	41	6	13	6	164	17.6	5.97	37.36	112.6	110.5	115.3	94	92.5	91	95	92.5	95.5	101.1
A0A1U7ZE48	Cation-transporting ATPase OS=Nelumbo nucifera OX=4432 GN=LOC104589175 PE=3 SV=1	9	11	14	11	1188	132.4	8.47	28.81	113.2	108.8	113.6	94.6	97.1	96.2	89.4	94.7	88.6	103.9
A0A1U8B762	casein kinase II subunit alpha-2 OS=Nelumbo nucifera OX=4432 GN=LOC104607978 PE=3 SV=1	21	6	10	5	405	46.9	8.12	22.86	112.5	142	104.2	87.9	95.2	93.4	82.9	82.4	93.5	105.9
A0A1U8A4S7	glutamate-rich WD repeat-containing protein 1 OS=Nelumbo nucifera OX=4432 GN=LOC104600735 PE=4 SV=1	19	6	9	6	475	52	5.57	23.76	112.6	118	103.8	92.2	97.8	98.4	95.6	94.7	85.1	101.8
A0A1U8BK42	KH domain-containing protein HEN4-like isoform X1 OS=Nelumbo nucifera OX=4432 GN=LOC104611942 PE=4 SV=1	16	8	12	7	667	70.9	9.01	21.91	105	102.7	100.1	103.4	100.2	107.1	97.2	89	96	99.5
A0A1U7ZWJ4	nuclear pore complex protein NUP62 OS=Nelumbo nucifera OX=4432 GN=LOC104598469 PE=4 SV=1	14	11	13	11	764	75.9	4.91	28.92	100.9	104.8	99.8	98.6	100.6	98.2	102.1	99.2	96	99.7
A0A1U8AKS4	ABC transporter F family member 3 OS=Nelumbo nucifera OX=4432 GN=LOC104604063 PE=4 SV=1	15	10	11	10	718	80.1	6.51	23.23	104.6	101.2	101.7	97.3	100.7	100	93.2	98	99	104.3
A0A1U8AUN1	N-carbamoylputrescine amidase OS=Nelumbo nucifera OX=4432 GN=LOC104607652 PE=4 SV=1	27	5	9	5	298	33.2	6.19	17.59	103.6	101.3	96.5	99.5	102.8	96.7	93.1	100.7	102.7	103.1
A0A1U7ZSF8	ATP-citrate synthase alpha chain protein 1 OS=Nelumbo nucifera OX=4432 GN=LOC104593159 PE=4 SV=1	24	8	11	2	426	46.9	6.09	25.98	111.3	114.8	113.3	96.8	89.2	97.7	95.6	91	92.3	98
A0A1U8B461	probable carboxylesterase 2 OS=Nelumbo nucifera OX=4432 GN=LOC104610599 PE=4 SV=1	27	8	12	8	328	36.1	5.94	29.26	126.8	130.1	127.2	85.5	84.6	85.3	85.1	82.9	86.1	106.2
A0A1U8AKY0	uncharacterized protein LOC104604129 isoform X1 OS=Nelumbo nucifera OX=4432 GN=LOC104604129 PE=4 SV=1	4	15	15	15	4283	478.8	6.43	18.19	115.1	116.3	112	91.2	94.7	97.2	87.3	90.3	91.5	104.4
A0A1U8AKH3	naringenin,2-oxoglutarate 3-dioxygenase-like OS=Nelumbo nucifera OX=4432 GN=LOC104605233 PE=3 SV=1	39	11	13	11	371	41.6	5.58	28.4	177.5	176.1	173.7	63.1	64.3	61.8	58.5	53.5	59.7	111.9
A0A1U8A6N4	cinnamoyl-CoA reductase 1 OS=Nelumbo nucifera OX=4432 GN=LOC104597290 PE=4 SV=1	23	9	15	9	326	36	6.01	41.41	87.8	89.9	89.7	106.3	104.8	108.4	106	103	105.2	99
A0A1U7ZQK9	3-hydroxyisobutyryl-CoA hydrolase-like protein 3, mitochondrial isoform X1 OS=Nelumbo nucifera OX=4432 GN=LOC104595250 PE=3 SV=1	25	11	12	11	433	47.6	8.02	26.09	104.5	102.6	103.6	101.6	101.3	97.5	92.1	99.2	97.3	100.4
A0A1U7ZTA6	mannose-1-phosphate guanylyltransferase 1 OS=Nelumbo nucifera OX=4432 GN=LOC104597092 PE=4 SV=1	26	8	13	3	361	39.6	7.23	24.49	122.3	122.8	128.7	93.6	88.5	89.2	78.4	91.5	79.6	105.3
A0A1U7ZRD4	aldehyde dehydrogenase family 2 member B7, mitochondrial-like OS=Nelumbo nucifera OX=4432 GN=LOC104593233 PE=3 SV=1	20	8	10	8	534	58.5	7.25	21.95	95.3	94.9	93.4	104.3	103.1	101.3	99.9	100.2	106.6	101
A0A1U7ZTR1	COP9 signalosome complex subunit 2 OS=Nelumbo nucifera OX=4432 GN=LOC104593548 PE=4 SV=1	17	7	10	7	439	51.5	6.73	23.63	104.7	105	109.9	100.2	98.1	97.8	94.1	94.6	93.5	102.2
A0A1U8Q2J5	titin isoform X1 OS=Nelumbo nucifera OX=4432 GN=LOC104591472 PE=4 SV=1	2	11	12	11	7123	797.4	4.45	19.65	122.3	124.1	112.7	88.1	99	90.6	86.8	83	84.9	108.6
A0A1U8BCB6	pyruvate decarboxylase 1-like OS=Nelumbo nucifera OX=4432 GN=LOC104613082 PE=3 SV=1	21	10	12	7	589	64.1	6.48	24.93	116.7	108.5	115.7	96.1	95.5	97.7	90.6	89.7	88.4	101.1
A0A1U7ZDA2	sterol 14-demethylase-like OS=Nelumbo nucifera OX=4432 GN=LOC104591877 PE=3 SV=1	17	7	12	6	490	55.8	8.87	24.55	174.2	172.4	173.3	61.2	58.4	62.2	63.1	63.3	64.8	107.1
A0A1U7Z6V9	nuclear transport factor 2-like OS=Nelumbo nucifera OX=4432 GN=LOC104591749 PE=4 SV=1	27	2	10	1	123	13.6	6	26.94	100.1	110.3	112	93.9	93.7	98	96.4	93.7	99.5	102.6
A0A1U8A1R5	ras GTPase-activating protein-binding protein 2 isoform X1 OS=Nelumbo nucifera OX=4432 GN=LOC104599332 PE=4 SV=1	13	8	9	4	463	50.2	5.24	25.98	106	107.6	108.7	102.1	97.8	97.8	93.8	95.5	92.9	97.7
A0A1U8AMQ1	KH domain-containing protein At4g18375-like OS=Nelumbo nucifera OX=4432 GN=LOC104601909 PE=4 SV=1	25	12	16	10	648	69.2	6.61	28.64	106.4	104.8	99.2	99.2	100.1	99.3	94.8	100	96.8	99.5
A0A1U8BAX6	protein SAD1/UNC-84 domain protein 1-like isoform X1 OS=Nelumbo nucifera OX=4432 GN=LOC104611507 PE=4 SV=1	25	10	16	10	455	50.5	8.73	25.78	110.2	108.8	111.7	92.5	95.5	97.2	96.1	96.4	91.1	100.7
A0A1U8A6G9	11 kDa late embryogenesis abundant protein OS=Nelumbo nucifera OX=4432 GN=LOC104597555 PE=4 SV=1	36	5	25	5	98	10.5	9.66	67.72	45.5	44.8	46.5	120.5	119.3	116.4	136.2	138.5	138.6	93.8
A0A1U7Z1L0	Superoxide dismutase [Cu-Zn] OS=Nelumbo nucifera OX=4432 GN=LOC104585738 PE=3 SV=1	34	6	16	1	152	15.3	6.05	42.51	124.1	126.2	112.6	100.3	91	93.7	71.6	85.7	96.7	98.2
A0A1U7ZPZ6	zinc finger BED domain-containing protein DAYSLEEPER-like OS=Nelumbo nucifera OX=4432 GN=LOC104592496 PE=4 SV=1	20	11	14	6	667	75.6	6.62	25.28	106	113	105.4	96	92.6	96.7	91	93.6	103	102.6
A0A1U8ANZ8	conserved oligomeric Golgi complex subunit 7 OS=Nelumbo nucifera OX=4432 GN=LOC104602330 PE=4 SV=1	12	9	11	9	839	92.8	5.3	22.44	138.4	135.5	125.5	85.5	86.2	87.7	75.7	84.2	79.8	101.5
A0A1U8B0L2	40S ribosomal protein S15 isoform X1 OS=Nelumbo nucifera OX=4432 GN=LOC104609534 PE=3 SV=1	19	2	17	2	152	17.3	10.43	37.02	105.5	108.4	104.1	97.5	97.6	102.5	93.5	98.3	94.9	97.8
A0A1U7ZE95	sorting nexin 1 OS=Nelumbo nucifera OX=4432 GN=LOC104589207 PE=4 SV=1	27	12	15	12	404	46.3	8.16	28.5	115.9	119.6	114.2	96	101.8	99.1	81.4	84.2	82.2	105.5
A0A1U7ZJ86	protein TRIGALACTOSYLDIACYLGLYCEROL 2, chloroplastic OS=Nelumbo nucifera OX=4432 GN=LOC104594537 PE=4 SV=1	28	8	13	8	382	41.9	8.81	21.78	96	100.8	87.8	106.5	101.3	101.5	99.4	101.7	98.9	106.1
A0A1U8AGE2	ubiquitin domain-containing protein DSK2a-like OS=Nelumbo nucifera OX=4432 GN=LOC104603753 PE=4 SV=1	19	8	11	3	554	58.8	4.92	22.85	104.9	108.5	100.6	99.8	98.1	98.5	93.8	93.9	95.1	106.7
A0A1U7Z039	NADH dehydrogenase [ubiquinone] flavoprotein 2, mitochondrial-like OS=Nelumbo nucifera OX=4432 GN=LOC104589639 PE=4 SV=1	35	8	11	8	257	28.8	7.93	24.54	99.7	106.8	102.8	97.9	91.2	96.1	101.4	101.5	103.6	99
A0A1U7ZQT3	probable NAD(P)H dehydrogenase (Quinone) FQR1-like 3 OS=Nelumbo nucifera OX=4432 GN=LOC104596956 PE=4 SV=1	41	5	9	5	209	22.9	6.39	17.62	78.3	82	83.4	109.9	111.9	108.2	110.5	113.2	108.7	94
A0A1U7Z8L4	ATP-dependent Clp protease proteolytic subunit OS=Nelumbo nucifera OX=4432 GN=LOC104587472 PE=3 SV=1	21	7	12	7	394	43.4	9.11	18.09	96.4	101.9	93.1	100.6	101.4	99.9	101.3	100.8	103	101.7
A0A1U7Z3C8	uncharacterized protein LOC104585883 OS=Nelumbo nucifera OX=4432 GN=LOC104585883 PE=4 SV=1	25	7	9	7	365	39.2	7.52	19.41	75.5	76.7	78.5	114.9	111.4	117.4	105.1	112.6	110	97.9
A0A1U7ZD78	protein MOR1 OS=Nelumbo nucifera OX=4432 GN=LOC104588893 PE=4 SV=1	7	14	14	14	2036	223.7	7.97	23.55	125	121.7	124.6	91.6	96.4	89.3	87	82.8	80.9	100.6
A0A1U8B5D1	alpha-L-fucosidase 2 OS=Nelumbo nucifera OX=4432 GN=LOC104607444 PE=4 SV=1	10	8	12	8	847	95.1	6.19	31	97.6	98.5	96.8	101.2	102.5	98.7	100.4	102.6	101.4	100.2
A0A1U8B6Q4	uncharacterized protein LOC104611382 OS=Nelumbo nucifera OX=4432 GN=LOC104611382 PE=4 SV=1	34	9	12	9	376	41.3	5.12	22.25	107.1	109.1	114.4	101.1	95.6	99.1	85.3	90.8	97.9	99.7
A0A1U8A1G3	probable membrane-associated 30 kDa protein, chloroplastic OS=Nelumbo nucifera OX=4432 GN=LOC104598282 PE=4 SV=1	26	7	12	5	325	35.9	9.17	26.22	116.8	114.9	112	93.9	90.5	89.8	92.3	88.9	93.3	107.4
A0A1U8AJB6	tRNA(Adenine(34)) deaminase, chloroplastic OS=Nelumbo nucifera OX=4432 GN=LOC104600866 PE=3 SV=1	11	13	15	13	1280	142.6	6.84	20.85	96.1	101.3	99.9	98.4	105.9	100.4	95.5	98.3	99.8	104.3
A0A1U8BLQ1	histone deacetylase HDT1-like OS=Nelumbo nucifera OX=4432 GN=LOC104612505 PE=4 SV=1	28	8	9	7	319	34.7	4.77	24.14	69	70.7	67.3	106.9	107.1	106.7	122.5	125.7	128.6	95.5
A0A1U7YW65	7-hydroxymethyl chlorophyll a reductase, chloroplastic OS=Nelumbo nucifera OX=4432 GN=LOC104587634 PE=4 SV=1	20	7	9	7	462	51.3	8.53	24.88	94.9	94.9	95.7	106.5	100.3	108.5	100.4	102.5	99	97.3
A0A1U8B951	Trafficking protein particle complex subunit OS=Nelumbo nucifera OX=4432 GN=LOC104608535 PE=3 SV=1	38	7	10	3	186	20.9	4.51	28.45	117	117.3	114.8	95.3	94.4	93.8	87.5	82.8	93.1	104
A0A1U7ZH09	Uridine kinase OS=Nelumbo nucifera OX=4432 GN=LOC104592917 PE=3 SV=1	21	9	12	5	474	53	6.89	26.09	101.6	105.3	102.3	97.1	96.8	96.7	102.6	98.1	94.8	104.6
A0A1U7Z786	uncharacterized protein LOC104589978 OS=Nelumbo nucifera OX=4432 GN=LOC104589978 PE=4 SV=1	17	11	11	11	758	85.6	5.77	26.87	112.3	114.7	114.5	91.5	95.1	95.2	91.6	98.2	85.3	101.7
A0A1U7Z552	probable cinnamyl alcohol dehydrogenase 1 OS=Nelumbo nucifera OX=4432 GN=LOC104590445 PE=4 SV=1	28	6	11	6	280	30.7	6.52	29.58	100.2	105	99.3	103	99.5	98	94.3	97.3	102	101.3
A0A1U8BA33	uncharacterized protein LOC104612428 OS=Nelumbo nucifera OX=4432 GN=LOC104612428 PE=4 SV=1	24	11	15	11	459	49.3	5.94	30.89	102.8	100	100.1	98.7	102.5	96.4	95.3	103	100.2	101
A0A1U8B592	protein TRIGALACTOSYLDIACYLGLYCEROL 4, chloroplastic OS=Nelumbo nucifera OX=4432 GN=LOC104609872 PE=4 SV=1	25	10	13	10	480	53	9.42	32.97	84.4	87.1	88.1	108.1	106.5	106.9	105.5	110.3	103.1	99.9
A0A1U7Z6D5	pentatricopeptide repeat-containing protein At1g80270, mitochondrial-like OS=Nelumbo nucifera OX=4432 GN=LOC104590858 PE=4 SV=1	17	11	14	9	632	71.5	7.33	23	93.8	97.8	95.4	104.1	105.7	105.1	98.4	94	103.9	101.9
A0A1U8AG70	glutaredoxin-C4 OS=Nelumbo nucifera OX=4432 GN=LOC104599905 PE=4 SV=1	41	4	11	4	133	14.6	5.3	31.46	79.1	80.3	85.6	109.3	109.9	111.3	112	111.6	103.9	96.8
D3WC70	Photosystem II D2 protein OS=Nelumbo nucifera OX=4432 GN=psbD PE=3 SV=1	20	5	12	5	353	39.6	5.55	35.98	168.6	162.8	164.1	63.5	65.6	62.3	65	69.6	73.3	105.2
A0A1U8AKL4	Chlorophyll a-b binding protein, chloroplastic OS=Nelumbo nucifera OX=4432 GN=LOC104601250 PE=3 SV=1	23	7	11	5	288	31.3	6.55	23.85	172	166.4	169.1	60.9	62.3	58.1	64.8	71.2	65.5	109.6
A0A1U7ZBU6	eukaryotic translation initiation factor 4B2-like OS=Nelumbo nucifera OX=4432 GN=LOC104593062 PE=4 SV=1	24	13	14	5	530	59	8.19	27.86	112.7	105.6	107.6	92.8	96.5	92.1	96	94.8	101	100.9
A0A1U7YXW6	60S ribosomal protein L27 OS=Nelumbo nucifera OX=4432 GN=LOC104588973 PE=3 SV=1	42	6	13	6	135	15.6	10.51	37.47	101.1	97.7	104.2	91.6	93.3	105.9	102.2	95.1	100.4	108.4
A0A1U7ZCH2	dnaJ homolog subfamily B member 13 OS=Nelumbo nucifera OX=4432 GN=LOC104589095 PE=4 SV=1	30	8	9	7	342	37.7	9.03	17.78	87.4	88.1	84.7	117.9	105.1	105.4	100.1	110.5	102.7	98
A0A1U8AJP1	uncharacterized protein LOC104600988 OS=Nelumbo nucifera OX=4432 GN=LOC104600988 PE=4 SV=1	18	3	9	3	180	19	9.91	33.13	44.3	42.2	43.9	113.2	110.2	109.5	154.2	145.6	144.4	92.6
A0A1U8AES3	ribonuclease P protein subunit p25-like protein isoform X1 OS=Nelumbo nucifera OX=4432 GN=LOC104602166 PE=4 SV=1	35	7	9	4	237	26.3	10.52	22.34	109	99.3	102.7	99.4	101.8	99.8	95.2	97.2	95.4	100.1
A0A1U8AR53	FGGY carbohydrate kinase domain-containing protein-like isoform X1 OS=Nelumbo nucifera OX=4432 GN=LOC104603188 PE=4 SV=1	11	5	10	5	576	62	6.38	21.63	101.7	101	98.5	105.1	109.8	100.2	90.5	98.3	97.6	97.3
A0A1U7ZFS8	importin beta-like SAD2 OS=Nelumbo nucifera OX=4432 GN=LOC104593565 PE=4 SV=1	10	9	13	9	1030	118.4	4.98	25.4	98.8	95.6	99.7	97.6	100.8	98.8	103.9	98.3	102	104.4
A0A1U8AIL6	uncharacterized protein LOC104603386 OS=Nelumbo nucifera OX=4432 GN=LOC104603386 PE=4 SV=1	8	12	16	9	1400	152.9	5.48	32.26	91.1	93.7	84.7	103.4	111.7	104.6	110.5	99.6	98.9	102
A0A1U7ZA90	60S ribosomal protein L21-1 OS=Nelumbo nucifera OX=4432 GN=LOC104592675 PE=4 SV=1	35	4	11	1	164	18.8	10.54	33.79	114.1	107.2	109.5	93.5	92.2	87.3	99.3	99.3	101.8	95.7
A0A1U7Z0M3	probable glucan endo-1,3-beta-glucosidase A6 OS=Nelumbo nucifera OX=4432 GN=LOC104589796 PE=3 SV=1	22	7	10	7	466	51.8	9.11	23.13	94	97.5	97.4	107.6	103.9	102	102.2	99	99.9	96.5
A0A1U8B528	DEAD-box ATP-dependent RNA helicase 40 OS=Nelumbo nucifera OX=4432 GN=LOC104607084 PE=4 SV=1	8	8	11	4	1174	128.7	10.07	23.9	103.3	105.9	108.3	93.5	97.8	94.1	97.1	96	100.5	103.6
A0A1U8BFG4	acyl-CoA-binding protein-like OS=Nelumbo nucifera OX=4432 GN=LOC104612875 PE=4 SV=1	47	4	13	2	90	10.1	5.22	40.38	127	120.8	124.7	86.3	81.3	82.7	91.7	86.9	99.2	99.4
A0A1U7Z131	Protoporphyrinogen oxidase OS=Nelumbo nucifera OX=4432 GN=LOC104585578 PE=3 SV=1	16	9	11	9	569	61.5	8.9	26.43	129.7	131.2	132.3	80.1	89.4	87.8	74.9	84.2	79.8	110.7
A0A1U8BHT2	pto-interacting protein 1-like OS=Nelumbo nucifera OX=4432 GN=LOC104611259 PE=3 SV=1	22	7	15	1	362	38.8	7.25	25.49	103.3	121.4	107	88.1	103.9	95	91.8	86	113.8	89.6
A0A1U8Q8U3	bifunctional UDP-glucose 4-epimerase and UDP-xylose 4-epimerase 1-like isoform X1 OS=Nelumbo nucifera OX=4432 GN=LOC104608755 PE=3 SV=1	26	8	11	1	366	40.6	6.64	28.72	55.3	67	58.7	120.6	106.6	123.8	132.2	122.1	119	94.7
A0A1U7ZDY7	cysteine desulfurase, mitochondrial OS=Nelumbo nucifera OX=4432 GN=LOC104589121 PE=3 SV=1	22	10	12	10	461	50.8	8.19	24.88	92.2	97.6	92.3	103.8	108.3	103.4	104	96.1	103.3	98.8
A0A1U7ZE44	Translocase of chloroplast OS=Nelumbo nucifera OX=4432 GN=LOC104593096 PE=3 SV=1	24	6	8	6	312	34.7	9.7	21.27	101.6	105.6	106	101	101.5	107.6	92.3	87.5	94.2	102.7
A0A1U8AY74	acetate/butyrate--CoA ligase AAE7, peroxisomal-like OS=Nelumbo nucifera OX=4432 GN=LOC104605106 PE=4 SV=1	15	9	14	3	567	62.1	8.07	28.14	119.1	118.3	116.8	90.4	91.6	94.1	87.3	91.7	88.6	102.1
A0A1U8A4U5	transportin-1-like OS=Nelumbo nucifera OX=4432 GN=LOC104596758 PE=4 SV=1	13	11	13	6	889	99.7	5.03	18.1	115.9	106	96.8	97.7	97.4	94.3	94.9	98.3	97	101.8
A0A1U8AW64	vacuolar-sorting receptor 3-like OS=Nelumbo nucifera OX=4432 GN=LOC104608196 PE=4 SV=1	17	10	17	3	635	70.3	5.71	27.04	110.5	112.7	110.1	92.1	94	92.2	93.9	97	93	104.6
A0A1U7ZJZ0	zinc finger CCCH domain-containing protein 11 OS=Nelumbo nucifera OX=4432 GN=LOC104594728 PE=4 SV=1	28	10	13	10	367	41.8	5.31	29.42	110.9	108.7	113	95.5	95.1	96.4	90.9	95.1	94.8	99.6
A0A1U8AT08	L-ascorbate peroxidase 3, peroxisomal OS=Nelumbo nucifera OX=4432 GN=LOC104603616 PE=3 SV=1	30	10	16	8	284	31.4	7.94	34.32	129.1	129.8	132.9	87.4	90.8	87.2	80.8	78.9	79.6	103.5
A0A1U7ZZK9	uncharacterized protein LOC104597802 isoform X1 OS=Nelumbo nucifera OX=4432 GN=LOC104597802 PE=4 SV=1	23	8	10	8	494	53	5.76	19.81	95.1	104.7	94.2	95.8	99.8	96	104.4	102.9	106.6	100.4
A0A1U8AZL2	uncharacterized protein LOC104608055 isoform X1 OS=Nelumbo nucifera OX=4432 GN=LOC104608055 PE=4 SV=1	20	7	9	7	516	57.5	5.52	24.07	113.7	117.8	115	91.7	94.1	95.4	93.2	90.7	89.3	99.1
A0A1U8BBP7	omega-amidase, chloroplastic-like OS=Nelumbo nucifera OX=4432 GN=LOC104609353 PE=4 SV=1	28	9	11	6	377	41.5	8.27	25.99	106.3	113.6	99.6	96.5	102.1	101.1	92	89.3	94.7	104.8
A0A1U8AUA5	protein disulfide isomerase-like 2-3 OS=Nelumbo nucifera OX=4432 GN=LOC104606513 PE=3 SV=1	21	9	12	6	434	47.4	6.02	25.37	95.6	96.8	93.4	108.4	105.2	102.2	102	96.8	97.9	101.7
A0A1U8BBB7	vacuolar-sorting receptor 3-like OS=Nelumbo nucifera OX=4432 GN=LOC104611623 PE=4 SV=1	14	8	14	2	634	70.2	5.26	30.37	104.8	110.1	106.2	105.6	100.5	87.5	94.1	97.2	90.4	103.7
A0A1U8A593	protein LURP-one-related 10 OS=Nelumbo nucifera OX=4432 GN=LOC104597229 PE=4 SV=1	20	3	7	3	213	23.7	6.54	19.2	122.5	127.6	132.1	90.2	91.6	83.9	84.1	78.7	87.9	101.5
A0A1U7ZTD8	Reticulon-like protein OS=Nelumbo nucifera OX=4432 GN=LOC104593454 PE=4 SV=1	27	7	14	5	254	28.1	8.24	32.77	96.4	96.6	98.5	102.6	104.1	103.7	101.5	100.6	100	95.9
A0A1U7Z373	ubiquitin receptor RAD23b-like OS=Nelumbo nucifera OX=4432 GN=LOC104589833 PE=4 SV=1	24	8	10	5	378	40.4	4.61	24.91	117.3	118.6	118.1	93	93.5	92.3	83.9	87.9	92.2	103.3
A3FPF2	Defensin-like protein OS=Nelumbo nucifera OX=4432 PE=3 SV=1	42	2	58	1	77	8.4	8.34	194.31	94.6	95.7	96.8	92.6	96.3	93	110.1	107.1	112.6	101.1
A0A1U7ZDR3	uncharacterized protein Os08g0359500-like isoform X1 OS=Nelumbo nucifera OX=4432 GN=LOC104593564 PE=4 SV=1	34	7	12	5	172	19.9	4.56	26.67	122.2	124.1	126.4	97.4	98.2	93.2	78.8	78.3	79.8	101.6
A0A1U8B435	epidermal growth factor receptor substrate 15-like OS=Nelumbo nucifera OX=4432 GN=LOC104606815 PE=4 SV=1	8	9	11	3	1083	117.4	5.57	23.84	114.6	112.6	110.5	92.2	92.1	91.5	91.4	94.1	98.8	102.1
A0A1U8AY30	aldehyde dehydrogenase 22A1 OS=Nelumbo nucifera OX=4432 GN=LOC104605062 PE=3 SV=1	17	9	10	9	595	65.9	7.56	22.16	135.9	140.1	132.9	82	86.9	87.8	74.7	76.9	82.9	99.7
D3WCA5	30S ribosomal protein S4, chloroplastic OS=Nelumbo nucifera OX=4432 GN=rps4 PE=3 SV=1	38	7	10	7	201	23.5	10.61	24.34	97.3	96.1	98.2	108.7	107.1	110.7	92.7	97	95.3	96.9
A0A1U8Q138	uncharacterized protein LOC104588436 OS=Nelumbo nucifera OX=4432 GN=LOC104588436 PE=4 SV=1	8	7	9	6	1233	138.2	8.15	23.63	115.7	115.6	111.8	93.7	91.3	92.8	91.5	87	93.6	107
A0A1U8B7P0	AP-1 complex subunit gamma OS=Nelumbo nucifera OX=4432 GN=LOC104607908 PE=3 SV=1	14	10	11	10	876	95.7	6.55	23.28	107.9	110.8	106.5	97.3	95.4	95.6	94.3	95.4	95.3	101.4
A0A1U8A3T1	uncharacterized serine-rich protein C215.13 OS=Nelumbo nucifera OX=4432 GN=LOC104598892 PE=4 SV=1	18	8	10	8	519	54.1	7.85	24.02	106.4	103.3	99.5	98.1	99.9	96	96.6	96.5	99.8	103.9
A0A1U7ZHE1	UDP-glucuronic acid decarboxylase 6 OS=Nelumbo nucifera OX=4432 GN=LOC104594584 PE=4 SV=1	30	8	11	7	344	38.8	7.56	25.22	120.7	118.2	122.2	90.9	89.1	86.4	91.8	90.4	90.1	100.2
A0A1U7ZW35	isoaspartyl peptidase/L-asparaginase 1 OS=Nelumbo nucifera OX=4432 GN=LOC104597874 PE=4 SV=1	29	7	8	7	319	33.5	5.19	21.66	110.5	106.9	109.9	97.7	93.6	94	92.6	99.2	93.1	102.6
A0A1U8B6E6	ubiquitin fusion degradation protein 1 homolog OS=Nelumbo nucifera OX=4432 GN=LOC104607504 PE=4 SV=1	30	8	14	4	315	35	6.87	31.95	105.1	107.9	107.3	95.3	102.7	100.2	94	94.4	92.6	100.4
A0A1U8BBI7	Arogenate dehydratase OS=Nelumbo nucifera OX=4432 GN=LOC104612774 PE=4 SV=1	27	7	8	7	395	43.2	6.87	22.64	93.3	94.3	90.2	105.9	106.3	106.2	100.7	97.9	106.1	99.2
A0A1U7ZEY8	probable apyrase 1 OS=Nelumbo nucifera OX=4432 GN=LOC104589842 PE=3 SV=1	19	6	10	6	469	51	7.66	23.87	108.6	108.7	110.4	94	95.5	92	93.2	93.8	99	105
A0A1U8Q9I3	uncharacterized protein LOC104610304 OS=Nelumbo nucifera OX=4432 GN=LOC104610304 PE=4 SV=1	24	7	11	7	353	40.1	5.74	26.15	88.3	91.6	92.5	102.9	105.2	101.7	105.7	103.7	104.4	104.1
A0A1U8A3G2	ATP-dependent Clp protease proteolytic subunit OS=Nelumbo nucifera OX=4432 GN=LOC104596355 PE=3 SV=1	14	6	12	6	311	33.8	5.97	27.97	99.2	97.4	98.6	101.3	100.2	99.9	101.1	101.3	99.9	101.2
A0A1U8A7L1	pumilio homolog 2-like OS=Nelumbo nucifera OX=4432 GN=LOC104601067 PE=4 SV=1	10	10	14	2	1050	113.1	6.54	22.69	101.7	101.4	90.6	110.6	98.7	102.6	101.4	91.7	104.7	96.5
A0A1U7YW34	histone deacetylase HDT1-like isoform X1 OS=Nelumbo nucifera OX=4432 GN=LOC104587610 PE=4 SV=1	21	8	13	7	309	33.9	4.92	32.93	55.6	58	57.5	112	114.8	115.9	130.5	129.6	129.5	96.7
A0A1U8A5V1	probable proteasome inhibitor OS=Nelumbo nucifera OX=4432 GN=LOC104597065 PE=4 SV=1	26	6	9	6	306	32.3	5.35	17.94	94	99.4	90.7	110.6	106.6	107.3	93.5	96.6	97.3	104
A0A1U7ZZX0	Histone H2A OS=Nelumbo nucifera OX=4432 GN=LOC104595312 PE=3 SV=1	35	5	15	4	136	14.5	10.18	36.87	110.9	109.4	108.6	95.5	104.3	102.3	89	92.8	88.8	98.4
A0A1U8BET4	uncharacterized protein LOC104610355 OS=Nelumbo nucifera OX=4432 GN=LOC104610355 PE=4 SV=1	40	6	10	6	160	17.5	9.23	25.99	157.6	156.9	153.1	76.8	70.9	69.2	72.8	69.4	69.2	104.1
A0A1U8AMN5	uncharacterized protein LOC104605601 isoform X1 OS=Nelumbo nucifera OX=4432 GN=LOC104605601 PE=4 SV=1	8	11	12	11	1632	177	7.72	20.49	112.6	117.6	107	94.6	96.6	98.9	89.8	88	86.9	107.9
A0A1U7ZKU5	Thioredoxin OS=Nelumbo nucifera OX=4432 GN=LOC104595587 PE=3 SV=1	38	4	15	2	114	12.8	5.95	33.77	93.4	87.8	92.8	112	106.6	109.7	104.6	91.2	103.2	98.7
A0A1U8AJN2	uncharacterized protein LOC104604691 OS=Nelumbo nucifera OX=4432 GN=LOC104604691 PE=4 SV=1	19	10	12	10	503	56.1	5.12	29.46	122	116.9	117.9	92.6	90.6	96.4	84.2	88.4	86.7	104.4
A0A1U8AIB7	DNA-directed RNA polymerase subunit OS=Nelumbo nucifera OX=4432 GN=LOC104604309 PE=3 SV=1	6	10	11	10	1848	206.2	6.14	22.33	102.7	107.3	103.8	99.8	96.5	103	88.5	96.3	97.4	104.7
A0A1U7ZZR2	diaminopimelate decarboxylase 2, chloroplastic-like isoform X1 OS=Nelumbo nucifera OX=4432 GN=LOC104595632 PE=3 SV=1	11	5	9	1	481	53.1	7.52	30.86	102.3	106.7	100.7	98.6	95.2	97	109.6	95.8	93.4	100.7
A0A1U7ZP28	nuclear ubiquitous casein and cyclin-dependent kinase substrate 1-like OS=Nelumbo nucifera OX=4432 GN=LOC104592280 PE=4 SV=1	28	8	15	8	319	34.7	5.45	33.68	94.7	93.5	91.1	98.9	102.4	102.8	102.7	103.8	106.8	103.4
A0A1U7Z0R8	plant UBX domain-containing protein 4 OS=Nelumbo nucifera OX=4432 GN=LOC104588047 PE=4 SV=1	23	9	10	9	394	42.7	5.4	20.84	112	109.3	102.9	97.1	98.9	97	92.9	96.5	92.2	101.2
A0A1U7YYY2	probable UDP-arabinopyranose mutase 5 isoform X2 OS=Nelumbo nucifera OX=4432 GN=LOC104588541 PE=4 SV=1	23	8	12	6	430	48	5.71	23.95	98.9	111.5	91.6	99	107.4	103.2	88.9	90.7	112	96.8
A0A1U8AK20	mannose-1-phosphate guanylyltransferase 1-like OS=Nelumbo nucifera OX=4432 GN=LOC104601119 PE=4 SV=1	26	9	13	4	361	39.4	7.05	23.04	121.9	122.1	119.6	90.9	92	90.2	88.4	86.6	86.7	101.5
A0A1U8B2H4	NADPH-dependent pterin aldehyde reductase isoform X1 OS=Nelumbo nucifera OX=4432 GN=LOC104610175 PE=3 SV=1	30	7	10	7	245	26.4	8.87	25.44	76.8	76.5	73.2	112.8	107	110.4	111.6	116.1	114.6	100.8
A0A1U8B998	aspartyl protease AED3-like OS=Nelumbo nucifera OX=4432 GN=LOC104608591 PE=3 SV=1	24	7	11	7	443	47.1	7.47	19.76	127.7	127.5	123.9	90.4	83.1	89.6	80	86.1	90	101.7
A0A1U8PZJ4	receptor homology region, transmembrane domain- and RING domain-containing protein 1 OS=Nelumbo nucifera OX=4432 GN=LOC104590046 PE=4 SV=1	14	5	6	5	486	53.7	6.89	22.6	82.4	89.4	91.3	123.7	116.8	114.6	96.7	89.1	92.7	103.2
A0A1U8B633	Glutamate dehydrogenase OS=Nelumbo nucifera OX=4432 GN=LOC104611147 PE=3 SV=1	20	7	10	7	411	44.7	6.74	24.5	99.5	102.5	96.4	102.7	103.1	106.2	93.7	97.5	101.2	97.2
A0A1U8A1V5	polypyrimidine tract-binding protein homolog 3-like isoform X1 OS=Nelumbo nucifera OX=4432 GN=LOC104599937 PE=4 SV=1	21	9	12	1	448	49.9	8.05	29.12	100.3	89.7	93.3	104.1	111.3	108.6	102.7	98.7	94	97.4
A0A1U7ZM41	Cytochrome b-c1 complex subunit 7 OS=Nelumbo nucifera OX=4432 GN=LOC104595322 PE=3 SV=1	46	5	11	1	123	14.5	9.52	29.61	94.8	93.9	96.4	100	99.1	100.8	102.6	104.3	105.2	102.8
A0A1U8AJE2	uracil phosphoribosyltransferase OS=Nelumbo nucifera OX=4432 GN=LOC104601122 PE=4 SV=1	30	7	10	7	287	31.3	8.92	27.27	101.7	99.8	98.8	95.6	101.5	103.8	103.5	104	93.6	97.5
A0A1U8AT77	myosin heavy chain, skeletal muscle OS=Nelumbo nucifera OX=4432 GN=LOC104603839 PE=4 SV=1	10	11	12	11	1388	156.6	4.7	20.8	138	140	131	84	88.6	86.3	74.1	71.7	80.7	105.6
A0A1U8Q9B1	NAD-dependent malic enzyme 62 kDa isoform, mitochondrial-like OS=Nelumbo nucifera OX=4432 GN=LOC104609908 PE=4 SV=1	30	8	11	8	264	28.8	5.08	25.71	98.4	100.5	98.5	99.7	99.6	100.8	100	104.3	96	102.2
A0A1U7ZRG4	protein MON2 homolog isoform X2 OS=Nelumbo nucifera OX=4432 GN=LOC104596541 PE=4 SV=1	10	13	14	13	1654	183.8	5.69	19.84	117.7	105.7	102.1	92.7	104.7	91	86	106.9	96.4	96.8
A0A1U8ANT3	uncharacterized protein LOC104606105 OS=Nelumbo nucifera OX=4432 GN=LOC104606105 PE=4 SV=1	36	7	10	7	195	21.9	9.52	26.5	88.2	96.6	88	101.1	112	102	106.4	98.2	105.7	101.7
A0A1U8BN35	conserved oligomeric Golgi complex subunit 5 OS=Nelumbo nucifera OX=4432 GN=LOC104612656 PE=4 SV=1	12	10	10	10	842	92.9	7.21	23.97	123.1	119.6	121.4	97.3	94.7	96	80.4	83.2	78.9	105.5
A0A1U8B1F2	alcohol dehydrogenase-like 7 OS=Nelumbo nucifera OX=4432 GN=LOC104608646 PE=3 SV=1	20	6	10	6	388	42	6.46	22.41	113.5	119.6	115	87.5	95.9	92.9	88.4	92	91.6	103.7
A0A1U7ZDC5	(+)-neomenthol dehydrogenase-like isoform X1 OS=Nelumbo nucifera OX=4432 GN=LOC104593476 PE=3 SV=1	25	9	11	9	394	42.7	6.73	20.57	136.6	141.4	134.8	84.5	84.1	89.5	72	76.6	77	103.6
A0A1U7ZFH1	UPF0160 protein C694.04c OS=Nelumbo nucifera OX=4432 GN=LOC104594040 PE=4 SV=1	25	8	10	8	367	41.3	6.71	20.46	101.6	104.3	97.4	97.2	101.5	97.4	99.8	99.3	99	102.6
A0A1U8BHT3	Glycine cleavage system H protein OS=Nelumbo nucifera OX=4432 GN=LOC104611005 PE=3 SV=1	17	2	10	2	154	16.7	4.87	23.53	77.9	78	76.7	114.4	111.2	114.2	114.7	111.3	105	96.6
A0A1U8AS01	aldehyde dehydrogenase family 2 member B7, mitochondrial-like OS=Nelumbo nucifera OX=4432 GN=LOC104603467 PE=3 SV=1	20	7	10	7	539	58.9	6.67	16.35	118.7	113.5	105.3	86.2	88.7	83.3	100.5	95.8	104.6	103.4
A0A1U7ZFQ7	probable splicing factor 3A subunit 1 OS=Nelumbo nucifera OX=4432 GN=LOC104593542 PE=4 SV=1	15	11	12	11	811	89.3	5.2	18.9	98.4	104.9	99.2	104.4	98.2	98	93.7	100	103.1	100.1
A0A1U8B222	Protein-lysine N-methyltransferase LOC104610034 OS=Nelumbo nucifera OX=4432 GN=LOC104610034 PE=3 SV=1	24	8	10	2	334	36.5	4.63	25.25	97.6	104.6	99.2	106.7	101.4	102.7	85.6	108.3	96.4	97.7
A0A1U7ZW84	Eukaryotic translation initiation factor 5A OS=Nelumbo nucifera OX=4432 GN=LOC104598389 PE=3 SV=1	44	7	28	1	159	17.3	5.58	41.55	131.2	118.6	128.9	97.9	93	93.9	78.7	73	78.8	105.9
A0A1U8AG91	uncharacterized protein LOC104604111 OS=Nelumbo nucifera OX=4432 GN=LOC104604111 PE=4 SV=1	12	8	14	3	665	72.5	6.95	33.23	99.9	103	100.4	109.3	102.1	99.3	95.6	87.3	100.6	102.4
A0A1U7YST8	protein transport protein Sec61 subunit alpha OS=Nelumbo nucifera OX=4432 GN=LOC104586563 PE=3 SV=1	12	6	23	6	476	52.2	8.92	43.76	104.5	108.6	98.6	104.3	104.1	102.6	81.9	85.2	99.3	111.1
A0A1U7ZCD1	pre-mRNA-splicing factor SYF1 OS=Nelumbo nucifera OX=4432 GN=LOC104588638 PE=4 SV=1	12	11	13	11	919	106.9	6.44	21.12	104.6	106.4	104.6	97.7	100.5	98.4	103.4	91.7	93.8	98.9
A0A1U8A5C9	40S ribosomal protein S15a-1 OS=Nelumbo nucifera OX=4432 GN=LOC104599295 PE=3 SV=1	36	5	18	5	130	14.8	9.89	44.8	104.6	101.9	106.4	100.1	101.9	101	97.6	94.9	91.6	100
A0A1U7ZHQ1	Protein arginine N-methyltransferase OS=Nelumbo nucifera OX=4432 GN=LOC104590273 PE=3 SV=1	19	10	10	10	649	72.5	6.15	18.16	102.7	96	105.8	98.1	101.9	101.2	99.7	94.6	99.3	100.5
A0A1U7ZX80	outer envelope pore protein 16, chloroplastic-like OS=Nelumbo nucifera OX=4432 GN=LOC104594539 PE=4 SV=1	52	7	17	7	146	15.6	8.21	38.57	75.2	72.8	74.6	113.6	115.1	115	111.6	111.5	114	96.6
A0A1U7ZE77	enoyl-CoA delta isomerase 2, peroxisomal-like OS=Nelumbo nucifera OX=4432 GN=LOC104593689 PE=4 SV=1	25	4	10	4	251	28	8.51	26.9	109	138.4	102.5	86.4	92.5	91.5	92.3	88.2	106.7	92.5
A0A1U7ZGZ1	SNF1-related protein kinase regulatory subunit gamma-1 OS=Nelumbo nucifera OX=4432 GN=LOC104592901 PE=4 SV=1	24	8	12	8	381	42.6	5.71	25.99	92.1	94.5	96.8	101.5	107.1	102.6	102.9	101.4	99.9	101.2
A0A1U7ZHQ7	C2 and GRAM domain-containing protein At5g50170 isoform X1 OS=Nelumbo nucifera OX=4432 GN=LOC104593084 PE=4 SV=1	13	11	11	11	1017	116.1	6.02	19.04	62.9	63.7	64.4	121.7	120.5	124.1	115.7	113.9	119	94
A0A1U8AHS9	ADP-ribosylation factor 3 isoform X1 OS=Nelumbo nucifera OX=4432 GN=LOC104603132 PE=3 SV=1	33	4	7	4	181	20.3	5.38	18.68	115.6	113.6	109.9	96.2	97.4	97.9	89.4	91.5	91.4	97
A0A1U7ZRZ3	macrophage migration inhibitory factor homolog OS=Nelumbo nucifera OX=4432 GN=LOC104597256 PE=4 SV=1	28	2	10	2	115	12.2	8.1	26.01	108.7	112.3	109.3	96.9	96.1	93	95	96.7	98.3	93.7
A0A1U7ZMA6	thylakoid lumenal 17.4 kDa protein, chloroplastic OS=Nelumbo nucifera OX=4432 GN=LOC104594306 PE=4 SV=1	19	4	7	4	237	25.5	7.97	20.76	96.4	102	99	98.6	101.7	103.3	102.7	102.3	95.9	98.1
A0A1U8APW7	eukaryotic translation initiation factor 4G-like isoform X1 OS=Nelumbo nucifera OX=4432 GN=LOC104606395 PE=4 SV=1	8	13	14	7	1957	211.7	6.61	23.31	107.8	125	107.8	95.3	90.5	80.8	96.4	93.1	105.2	98
A0A1U8BNG7	UPF0603 protein At1g54780, chloroplastic-like OS=Nelumbo nucifera OX=4432 GN=LOC104612994 PE=4 SV=1	20	5	10	5	294	32	7.43	29.07	105.3	103.9	103.7	104	101.6	101.5	90.2	95.5	91.5	102.7
A0A1U8AD04	heat shock factor-binding protein 1-like OS=Nelumbo nucifera OX=4432 GN=LOC104598982 PE=4 SV=1	52	3	10	3	89	9.8	4.46	32.77	107.9	109	109.1	93.4	97.2	92.9	97.3	98.5	95.5	99.3
A0A1U7ZHJ5	ankyrin repeat and SAM domain-containing protein 6 OS=Nelumbo nucifera OX=4432 GN=LOC104590227 PE=4 SV=1	28	7	9	6	211	23.6	9.45	20.52	107.9	104.7	111	91.8	92.9	92.8	101	97.9	102.2	97.8
A0A1U7Z9S2	chalcone synthase OS=Nelumbo nucifera OX=4432 GN=LOC104591893 PE=3 SV=1	27	8	14	8	393	42.9	6.54	28.14	201.7	203.9	201.3	47.5	46.8	47	44.5	48.6	50.2	108.5
A0A1U7ZD41	glycine-rich RNA-binding protein RZ1A OS=Nelumbo nucifera OX=4432 GN=LOC104588841 PE=4 SV=1	43	10	16	10	216	23.5	9.11	32.38	101.2	99	100.6	102.3	99.3	101.1	102.4	100.5	97.7	95.9
A0A1U8B0N6	subtilisin-like protease SBT1.3 OS=Nelumbo nucifera OX=4432 GN=LOC104608368 PE=4 SV=1	13	9	13	6	785	84.1	8.09	23.39	104.8	113.5	107.3	92.6	100.6	95.2	84.8	104.8	95.4	101
A0A1U8AUB3	SH3 domain-containing protein 2-like OS=Nelumbo nucifera OX=4432 GN=LOC104607535 PE=4 SV=1	23	8	8	4	371	41.1	6.73	19.41	113.8	115.4	115.3	90.7	90.7	92.1	91.4	94.4	93.3	102.8
A0A1U8B354	17.3 kDa class I heat shock protein-like OS=Nelumbo nucifera OX=4432 GN=LOC104609165 PE=3 SV=1	39	8	30	4	159	18	5.99	60.69	63.1	60.7	61.4	141.1	135.9	142.8	101	100.2	96.6	97.2
A0A1U8A4C5	nuclear cap-binding protein subunit 1 OS=Nelumbo nucifera OX=4432 GN=LOC104599013 PE=4 SV=1	13	10	11	10	863	98.2	5.12	26.14	102	118.4	109.2	88.5	100	96.4	90.4	90.3	92.1	112.8
A0A1U7ZCE0	uncharacterized protein LOC104588646 OS=Nelumbo nucifera OX=4432 GN=LOC104588646 PE=4 SV=1	8	8	10	7	1203	133.5	8.38	22.62	97.7	99.2	95.3	101.9	100.6	105.6	99.4	100.7	101.5	98.2
A0A1U8B3F0	Pyruvate kinase OS=Nelumbo nucifera OX=4432 GN=LOC104610400 PE=3 SV=1	19	10	11	5	590	64.8	7.69	23.31	154	156.3	157.8	71.4	77.6	74.7	66.4	64	70.2	107.7
A0A1U7ZSU9	26S proteasome non-ATPase regulatory subunit 7 homolog A OS=Nelumbo nucifera OX=4432 GN=LOC104596976 PE=4 SV=1	22	5	8	1	310	34.8	6.48	14.82	104.9	97.7	110.3	94.9	99.6	100.2	104.3	88.2	93.9	106
A0A1U7ZHW8	methyl-CpG-binding domain-containing protein 11-like OS=Nelumbo nucifera OX=4432 GN=LOC104590768 PE=4 SV=1	42	11	16	11	300	32.9	4.84	30.57	109	106	104.6	102.8	99.5	99.5	93.5	96.2	89.6	99.1
A0A1U8B847	Ferredoxin OS=Nelumbo nucifera OX=4432 GN=LOC104611740 PE=3 SV=1	45	5	7	5	146	16.1	5.95	18.53	147	149.7	139.3	78	80.5	83.4	75.2	68.5	69.7	108.5
A0A1U8AWM2	Transmembrane 9 superfamily member OS=Nelumbo nucifera OX=4432 GN=LOC104608325 PE=3 SV=1	9	5	9	1	466	53.8	6.87	24.11	151.5	144.2	147.9	82.1	77.8	76.9	64.5	75	71	109
A0A1U8BBW4	Anamorsin homolog OS=Nelumbo nucifera OX=4432 GN=LOC104611782 PE=3 SV=1	28	5	6	5	274	29.9	4.89	18.06	114.5	123.3	109.3	91.5	93	86.2	90.2	82	110.6	99.3
A0A1U7YXK1	signal recognition particle 54 kDa protein, chloroplastic OS=Nelumbo nucifera OX=4432 GN=LOC104588864 PE=3 SV=1	18	11	15	1	569	62.5	9.26	24.58
A0A1U8AMI2	50S ribosomal protein L9, chloroplastic OS=Nelumbo nucifera OX=4432 GN=LOC104604573 PE=3 SV=1	37	8	12	8	195	21.8	9.8	25.98	99.2	100.5	103.1	96.3	95.1	97.9	104.5	102.3	98.3	102.8
A0A1U8ACH5	D-lactate dehydrogenase [cytochrome], mitochondrial isoform X1 OS=Nelumbo nucifera OX=4432 GN=LOC104601473 PE=4 SV=1	18	9	11	9	571	62.7	6.05	21.61	94.1	94.9	89.3	96.9	99.2	102	104.5	103.1	100.7	115.4
A0A1U7ZEY2	cinnamoyl-CoA reductase 2 OS=Nelumbo nucifera OX=4432 GN=LOC104593889 PE=4 SV=1	21	6	8	6	327	35.8	6.18	21.12	101.1	102.5	105.3	99	95.5	97.3	98.7	98.7	100.7	101.1
A0A1U8AKU2	agmatine coumaroyltransferase-like OS=Nelumbo nucifera OX=4432 GN=LOC104601559 PE=4 SV=1	19	8	10	8	452	50.2	7.08	15.78	176.4	180.9	173.7	63.3	61.7	59.9	53.3	58.2	63.5	109.1
A0A1U8B8X2	fatty-acid-binding protein 1 OS=Nelumbo nucifera OX=4432 GN=LOC104611963 PE=4 SV=1	23	7	11	7	294	32.5	7.36	22.22	89.6	97.7	93.3	103.6	106.7	105.1	97.8	101	107.3	98
A0A1U8ATL4	actin cytoskeleton-regulatory complex protein PAN1 OS=Nelumbo nucifera OX=4432 GN=LOC104603781 PE=4 SV=1	10	9	11	3	1048	113.5	5.25	20.25	115.4	130.1	112.8	85.3	97.8	89.9	91.4	86.9	82.1	108.3
A0A1U7ZRG5	protein plastid transcriptionally active 16, chloroplastic OS=Nelumbo nucifera OX=4432 GN=LOC104597119 PE=4 SV=1	18	9	10	9	534	57.2	8.41	24.98	118	118.5	115.6	92.4	93	93.8	85.1	91.8	88.4	103.5
A0A1U8B2K2	serine/threonine-protein phosphatase 5 OS=Nelumbo nucifera OX=4432 GN=LOC104608995 PE=4 SV=1	24	9	11	9	485	54.6	5.94	22.46	109.1	106.2	108.9	98.2	94.9	96.7	91.4	93.9	95.7	105.1
A0A1U8B2Z1	upstream activation factor subunit spp27 OS=Nelumbo nucifera OX=4432 GN=LOC104610290 PE=4 SV=1	49	8	14	8	124	13.4	10.17	33.23	102.8	99.7	101.2	101.4	102.6	103.6	97.1	97.5	95.3	98.8
A0A1U8AST4	glutathione S-transferase F13-like OS=Nelumbo nucifera OX=4432 GN=LOC104606115 PE=3 SV=1	30	5	12	4	218	24.2	6.8	24.23	114.3	111.5	119.8	89	86.8	90.1	94	101	91.5	102.1
A0A1U8AAW1	glycine-rich cell wall structural protein isoform X2 OS=Nelumbo nucifera OX=4432 GN=LOC104600933 PE=4 SV=1	53	4	6	4	397	31	10.7	17.86	71.7	72.5	68.7	106.4	112.2	103.6	123.9	125.1	116.5	99.5
A0A1U8BBL4	uncharacterized protein LOC104611705 OS=Nelumbo nucifera OX=4432 GN=LOC104611705 PE=4 SV=1	18	8	10	8	441	50.6	9.17	25.12	119.7	118	123.2	91.5	89.9	92.1	89.7	89.1	88.8	97.9
A0A1U8AIU4	beta-fructofuranosidase, insoluble isoenzyme CWINV1 OS=Nelumbo nucifera OX=4432 GN=LOC104600692 PE=3 SV=1	17	9	11	9	575	64.2	8.78	24.11	106.5	104.3	107.6	94.1	100.8	99.6	95.6	100.1	91	100.4
A0A1U8APA2	methylcrotonoyl-CoA carboxylase beta chain, mitochondrial OS=Nelumbo nucifera OX=4432 GN=LOC104606211 PE=4 SV=1	22	10	11	10	568	61.8	8.48	25.71	90	89.2	88.1	109.6	103.8	102.1	103.6	99.8	111.1	102.6
A0A1U8AV61	Profilin OS=Nelumbo nucifera OX=4432 GN=LOC104604467 PE=3 SV=1	44	5	15	3	131	14.1	4.84	27.23	101.2	102.2	101.2	101.2	102.4	105.3	92.3	98.7	97	98.5
A0A1U7YYA3	CDK5RAP3-like protein OS=Nelumbo nucifera OX=4432 GN=LOC104587245 PE=4 SV=1	19	10	11	10	568	64	4.96	25.2	105.8	108.4	105.2	96.4	102.7	98.5	90.8	97.8	94.9	99.3
A0A1U8AQ76	S-formylglutathione hydrolase OS=Nelumbo nucifera OX=4432 GN=LOC104606350 PE=4 SV=1	28	5	12	5	181	20.3	6.84	41.53	91	88.5	89.9	105.7	111	110.1	100.2	98.2	102.6	102.8
A0A1U8AW45	probable N-acetyl-gamma-glutamyl-phosphate reductase, chloroplastic OS=Nelumbo nucifera OX=4432 GN=LOC104608189 PE=3 SV=1	23	7	9	7	403	44.5	7.49	19.69	106.1	110.4	97.8	101.4	99.8	96.2	95.1	96	97.8	99.4
A0A1U8B7Q6	uncharacterized protein LOC104611633 isoform X2 OS=Nelumbo nucifera OX=4432 GN=LOC104611633 PE=4 SV=1	24	7	10	7	458	50.2	6.47	22.17	104.9	105.7	108.5	94.6	92.2	105	94.1	93.8	98.8	102.4
A0A1U8Q690	callose synthase 3 OS=Nelumbo nucifera OX=4432 GN=LOC104603549 PE=4 SV=1	6	12	12	12	1947	224.5	9.17	21.9	116.1	114.6	118.7	94.6	93.9	89.3	88.7	88.1	91	104.9
A0A1U8A8K7	Adenylyl cyclase-associated protein OS=Nelumbo nucifera OX=4432 GN=LOC104601881 PE=3 SV=1	19	9	13	6	470	50.8	6.28	35.15	101.4	99.3	98.1	100.4	100.1	96.9	99.3	102.4	100.2	101.7
A0A1U8AZM9	60S ribosomal protein L14-2-like OS=Nelumbo nucifera OX=4432 GN=LOC104608075 PE=4 SV=1	50	8	15	2	133	15.3	10.4	34.11	66.5	70.5	41.9	163.7	175.4	164.3	44.7	60.7	88.5	123.8
A0A1U8B193	polyadenylate-binding protein 2 OS=Nelumbo nucifera OX=4432 GN=LOC104609820 PE=4 SV=1	37	6	7	3	231	26.5	5.1	19.48	93.4	95	93.8	99.8	98.1	101	107.3	111.5	105.2	95
A0A1U7ZPZ8	sulfite oxidase isoform X1 OS=Nelumbo nucifera OX=4432 GN=LOC104592903 PE=4 SV=1	27	9	9	9	393	43.5	7.74	17.31	129.4	128.7	129.2	89.4	80.1	88	85.4	87.9	79.5	102.4
A0A1U7ZWK5	BAG family molecular chaperone regulator 8, chloroplastic OS=Nelumbo nucifera OX=4432 GN=LOC104597990 PE=4 SV=1	17	7	12	7	473	53.5	7.34	19.08	98.6	95.4	96	103	104.3	102.6	98.5	99.3	98.1	104.3
A0A1U7Z694	cullin-4-like isoform X1 OS=Nelumbo nucifera OX=4432 GN=LOC104590815 PE=3 SV=1	13	11	11	2	827	94.3	7.17	27.66	99.5	97.5	100.8	101	107.5	107.1	94.1	91.7	97.4	103.5
A0A1U7ZQW7	Oleosin OS=Nelumbo nucifera OX=4432 GN=LOC104593119 PE=3 SV=1	17	2	19	2	137	14.5	9.25	50.27	69	68.8	68	102.5	101.2	100.6	134.9	132.4	128.9	93.5
A0A1U8B6X5	ATPase family AAA domain-containing protein 3-B-like OS=Nelumbo nucifera OX=4432 GN=LOC104611436 PE=4 SV=1	15	10	11	2	632	70.2	9.2	28.62	89.5	84.2	81.2	104.1	105	94	115.7	101.7	114.6	109.9
A0A1U8B9J5	glyoxylate/succinic semialdehyde reductase 1 OS=Nelumbo nucifera OX=4432 GN=LOC104612210 PE=4 SV=1	26	5	6	5	291	31.2	6.42	20.99	120.7	114.9	120.3	89.9	87.3	88.5	94.9	83.9	96.4	103.1
A0A1U8A9R2	uncharacterized protein LOC104598097 isoform X1 OS=Nelumbo nucifera OX=4432 GN=LOC104598097 PE=3 SV=1	53	6	13	6	137	15.4	4.97	27.34	123.7	120.6	123.2	92.4	91.3	90.9	82.7	81.8	87	106.4
A0A1U8B5D0	uncharacterized protein LOC104607157 OS=Nelumbo nucifera OX=4432 GN=LOC104607157 PE=4 SV=1	19	7	9	7	491	55	6.16	17.56	99.3	97.5	93.6	106.7	106.2	102.6	96.1	98.1	96.9	103
A0A1U7Z3U9	bifunctional protein FolD 4, chloroplastic OS=Nelumbo nucifera OX=4432 GN=LOC104590036 PE=3 SV=1	19	6	12	5	362	39	8.43	25.72	97.2	94.2	91.2	100.7	97.7	102.3	101.8	102.2	109.3	103.3
A0A1U8BHI3	Peptidyl-prolyl cis-trans isomerase OS=Nelumbo nucifera OX=4432 GN=LOC104611166 PE=4 SV=1	46	5	6	5	146	15.3	9.42	17.7	114.1	110.8	112.3	92.7	101.9	96.6	91.2	86.6	89	104.8
A0A1U7YUP3	ATP synthase subunit b', chloroplastic OS=Nelumbo nucifera OX=4432 GN=LOC104586123 PE=3 SV=1	32	7	9	7	220	24	7.49	19.56	106.3	107.4	105.7	95.6	99.1	97	97.1	97.6	92	102.2
A0A1U7Z979	photosystem II stability/assembly factor HCF136, chloroplastic OS=Nelumbo nucifera OX=4432 GN=LOC104592356 PE=4 SV=1	27	8	9	8	401	44.3	8.25	21.36	110.3	103.4	109.9	97.1	94.7	94.7	98.6	91	94.8	105.6
A0A1U7Z8A4	Carboxypeptidase OS=Nelumbo nucifera OX=4432 GN=LOC104587369 PE=3 SV=1	19	8	15	8	498	55.6	6.02	27	108.9	125.1	114.1	87.5	101.2	94.9	84.9	88.1	88.4	106.8
A0A1U7YU59	60S ribosomal protein L38 OS=Nelumbo nucifera OX=4432 GN=LOC104587012 PE=3 SV=1	54	4	20	4	69	8	9.88	37.05	102.5	102.4	105	96.8	99.8	94.7	100.6	97.1	98.5	102.7
A0A1U7ZY94	Protein transport protein Sec61 subunit beta OS=Nelumbo nucifera OX=4432 GN=LOC104594817 PE=3 SV=1	62	4	11	3	107	10.7	11.65	30.2	92.5	113.8	96.4	96.7	94.5	99	96.3	100.9	115.4	94.6
A0A1U7ZXR1	uncharacterized protein LOC104597305 OS=Nelumbo nucifera OX=4432 GN=LOC104597305 PE=4 SV=1	24	6	9	6	311	35.1	7.31	22.26	112.2	108.2	109.2	98.1	93	94.4	94.3	99.3	88.9	102.4
A0A1U7YYL0	bifunctional 3-dehydroquinate dehydratase/shikimate dehydrogenase, chloroplastic-like OS=Nelumbo nucifera OX=4432 GN=LOC104588429 PE=3 SV=1	22	7	10	5	358	39	8.16	23.88	102.3	103.3	92.7	93.6	104.8	105.5	94.1	94.7	109.4	99.7
A0A1U7ZTF2	UDP-sulfoquinovose synthase, chloroplastic OS=Nelumbo nucifera OX=4432 GN=LOC104593467 PE=4 SV=1	18	7	10	7	482	53.9	7.4	19.19	99.6	101.4	101	96.5	97.4	102.5	97.6	98.7	105.1	100.2
A0A1U8BF80	NEDD8-activating enzyme E1 regulatory subunit OS=Nelumbo nucifera OX=4432 GN=LOC104612798 PE=3 SV=1	16	7	10	7	523	58.4	5.12	22.62	106	109.7	104.1	98	98.4	98.6	88.6	96.9	97.2	102.5
A0A1U8AMN8	protein EXORDIUM-like 2 OS=Nelumbo nucifera OX=4432 GN=LOC104604606 PE=4 SV=1	22	6	10	6	307	32.9	8.87	27.24	96.6	104.9	99.9	100.2	102.3	101.9	100.1	99.6	94.2	100.2
A0A1U7ZCZ7	GrpE protein homolog OS=Nelumbo nucifera OX=4432 GN=LOC104589240 PE=3 SV=1	23	6	8	6	364	40.8	4.77	24.8	123.9	125.7	123.6	92.1	95.8	93.6	78.2	81.6	81.7	103.8
A0A1U8ASN6	aspartyl protease AED3-like OS=Nelumbo nucifera OX=4432 GN=LOC104606064 PE=3 SV=1	18	7	12	6	434	46.6	8.68	29.36	95.3	95.9	98.1	105	108.8	104.4	95.3	99.5	99.7	97.9
A0A1U8APN6	pre-mRNA-processing factor 39 isoform X1 OS=Nelumbo nucifera OX=4432 GN=LOC104602768 PE=4 SV=1	12	9	12	6	836	92.5	4.94	20.72	102.8	101	101	100	98.6	99.7	100.5	97.9	97.6	100.8
A0A1U7ZE89	40S ribosomal protein S17-like OS=Nelumbo nucifera OX=4432 GN=LOC104589628 PE=3 SV=1	31	7	12	5	143	16.1	10.04	24.64	103.2	106.2	108	99.8	103	95.3	94.6	93.3	96.9	99.9
A0A1U8A897	probable ubiquitin conjugation factor E4 OS=Nelumbo nucifera OX=4432 GN=LOC104598018 PE=4 SV=1	11	9	10	9	1032	117.2	5.86	17.4	106.9	108.6	108.6	103.1	97.2	98.1	93.9	89.8	92	101.7
A0A1U8B5M3	Aldose 1-epimerase OS=Nelumbo nucifera OX=4432 GN=LOC104609989 PE=3 SV=1	33	8	12	6	339	37	6.23	28.72	114.1	113.4	111.4	94.5	92.9	91.8	94.9	95.9	90.6	100.5
A0A1U8A9Y7	3-isopropylmalate dehydratase small subunit 3-like OS=Nelumbo nucifera OX=4432 GN=LOC104598471 PE=4 SV=1	30	5	6	5	254	27.1	7.42	18.24	91.9	99.5	97.6	106	99.6	99.2	99.4	99.3	106.9	100.4
A0A1U8A6J2	Peptidyl-prolyl cis-trans isomerase OS=Nelumbo nucifera OX=4432 GN=LOC104601270 PE=3 SV=1	30	6	13	3	207	22.4	9.41	30.77	105.9	106.4	111.6	95.2	101.3	92	98.4	98.4	90.4	100.4
A0A1U7Z435	40S ribosomal protein S20-2-like OS=Nelumbo nucifera OX=4432 GN=LOC104590107 PE=3 SV=1	48	7	16	7	122	13.5	9.67	28.97	106.9	108.6	106.3	94.6	94.2	97.9	97	97.4	93.9	103.3
A0A1U8AF60	COP9 signalosome complex subunit 8 OS=Nelumbo nucifera OX=4432 GN=LOC104599934 PE=4 SV=1	26	5	7	5	197	22.7	5.83	18.43	111	107.5	107.3	102.3	98.8	99.2	90.2	89.1	94.6	99.9
A0A1U8A6U6	coatomer subunit epsilon-1-like OS=Nelumbo nucifera OX=4432 GN=LOC104599746 PE=4 SV=1	30	6	10	6	331	36.4	5.6	19.94	123.4	137.5	126.9	84.2	85.2	86.3	81	88	85.8	101.6
A0A1U8AN69	Methionine aminopeptidase OS=Nelumbo nucifera OX=4432 GN=LOC104602275 PE=3 SV=1	28	8	12	8	403	44.4	7.12	20.49	111.9	111	108.9	93.3	95.9	94.9	93.6	99.2	94.5	96.6
A0A1U8B9H6	probable acyl-activating enzyme 18, peroxisomal isoform X1 OS=Nelumbo nucifera OX=4432 GN=LOC104611109 PE=4 SV=1	16	11	11	10	733	81	8.25	24.23	123.2	122.3	120.6	98.1	95.4	97	84.1	77.3	78.6	103.4
A0A1U8A217	ATP sulfurylase 2-like OS=Nelumbo nucifera OX=4432 GN=LOC104595898 PE=4 SV=1	18	8	9	8	489	54.7	6.89	24.75	120.9	116.9	118	90.1	89.3	89.9	90	91.4	91.7	101.9
A0A1U7Z8H2	sister chromatid cohesion protein PDS5 homolog A-like isoform X1 OS=Nelumbo nucifera OX=4432 GN=LOC104587885 PE=4 SV=1	6	9	10	7	1681	189.7	6.6	19.51	69.8	65.8	68	112.8	112.5	112.7	112.4	125.6	124.1	96.2
A0A1U8ATS6	NADH dehydrogenase [ubiquinone] 1 beta subcomplex subunit 9-like OS=Nelumbo nucifera OX=4432 GN=LOC104607506 PE=3 SV=1	64	6	11	3	113	13.2	8.97	29.3	98.7	95.8	94.9	96.8	95	95.9	106.4	112.1	105.8	98.7
A0A1U8ACN5	dnaJ homolog subfamily B member 13-like OS=Nelumbo nucifera OX=4432 GN=LOC104602593 PE=4 SV=1	28	8	10	5	341	37.4	9.23	17.33	108.1	105.3	109.6	92.1	99	98.3	99.6	94.7	93.6	99.7
A0A1U8ABP2	50S ribosomal protein L4, chloroplastic-like OS=Nelumbo nucifera OX=4432 GN=LOC104601218 PE=3 SV=1	21	8	12	8	305	33.9	9.23	34.45	97.1	97.5	99.5	96.9	100.3	99.9	105.2	102.9	102.5	98.2
A0A1U7Z860	Superoxide dismutase [Cu-Zn] OS=Nelumbo nucifera OX=4432 GN=LOC104587340 PE=3 SV=1	35	3	6	2	217	22.3	6.43	15.87	78.2	92.4	78.2	110.2	121.7	94.8	99.7	117.1	104.2	103.4
A0A1U7Z5T8	NAD-dependent malic enzyme 62 kDa isoform, mitochondrial-like OS=Nelumbo nucifera OX=4432 GN=LOC104590669 PE=4 SV=1	24	7	15	7	350	39.9	8.78	30.54	95.4	96	100.5	102.3	99.2	97.7	106.7	101.3	102.1	98.8
A0A1U8AB90	dnaJ protein P58IPK homolog OS=Nelumbo nucifera OX=4432 GN=LOC104602647 PE=4 SV=1	23	10	11	10	479	53.7	7.17	24.59	105.3	102	102.1	100.2	99.6	104.4	97.4	94	94.1	100.8
A0A1U7YSG8	50S ribosomal protein L31 OS=Nelumbo nucifera OX=4432 GN=LOC104586440 PE=3 SV=1	34	4	9	4	135	15	9.61	21.43	103.3	97.8	101	101.6	102.1	96.6	99.8	99.7	99.8	98.3
A0A1U7ZHK3	rhodanese-like domain-containing protein 11, chloroplastic OS=Nelumbo nucifera OX=4432 GN=LOC104593047 PE=4 SV=1	19	4	7	4	293	33.2	8.7	21.2	111.9	111.2	112.3	99.1	94.1	93.3	89.6	94.2	90.8	103.5
A0A1U8AQ96	protein FLX-like 4 OS=Nelumbo nucifera OX=4432 GN=LOC104605363 PE=4 SV=1	28	9	9	9	350	37.5	6.81	22.81	106.6	110	104.9	95.7	94.7	97.8	94.6	95	97.4	103.2
A0A1U8A5H4	conserved oligomeric Golgi complex subunit 3 isoform X1 OS=Nelumbo nucifera OX=4432 GN=LOC104600457 PE=4 SV=1	12	9	11	9	782	88.1	6.58	17.92	125.2	134.8	128.8	89.7	91.2	88.2	83.2	77.7	80.5	100.7
A0A1U7Z824	Cysteine proteinase inhibitor OS=Nelumbo nucifera OX=4432 GN=LOC104587305 PE=3 SV=1	40	4	7	4	133	14.9	5.16	15.48	110.6	101.7	110.9	95	92.9	90.4	93.2	105.5	99.4	100.4
A0A1U7ZTH3	protein RETICULATA-RELATED 3, chloroplastic-like OS=Nelumbo nucifera OX=4432 GN=LOC104593483 PE=4 SV=1	13	4	8	4	374	39.2	8.94	19.08	113.3	117.9	113.3	90.7	97.5	89.8	88.1	102.1	87.8	99.5
A0A1U7ZPT9	shikimate O-hydroxycinnamoyltransferase OS=Nelumbo nucifera OX=4432 GN=LOC104596613 PE=4 SV=1	21	7	9	7	454	50.4	6.07	21.62	101.7	110	102.8	95.6	97.6	97	99.6	98.7	96.7	100.2
A0A1U8B1J7	60S ribosomal protein L37a-1-like OS=Nelumbo nucifera OX=4432 GN=LOC104609837 PE=3 SV=1	52	6	22	1	92	10.2	10.23	44.99	107.8	101.7	103.9	93.4	90	94.7	97.3	110.4	100.8	99.8
A0A1U8A155	vesicle transport v-SNARE 13-like OS=Nelumbo nucifera OX=4432 GN=LOC104598215 PE=4 SV=1	35	7	9	4	221	24.9	9.1	26.01	102	97.2	97.5	104.2	104.7	102	98.7	102.1	96.7	94.9
A0A1U7ZH46	uncharacterized protein LOC104594511 OS=Nelumbo nucifera OX=4432 GN=LOC104594511 PE=4 SV=1	30	5	7	5	226	25.6	8.38	16.15	114.2	118	119.4	92.6	88.4	92.2	91.2	83.7	94.4	105.9
A0A1U8A1H1	60S ribosomal protein L37a-1 OS=Nelumbo nucifera OX=4432 GN=LOC104599807 PE=3 SV=1	52	6	23	1	92	10.2	10.23	48.66	103	98.9	100.8	94.2	96.4	95.6	105.2	103.2	102.6	100.3
A0A1U7Z651	acylamino-acid-releasing enzyme isoform X1 OS=Nelumbo nucifera OX=4432 GN=LOC104589648 PE=4 SV=1	11	7	9	7	831	91	7.06	20.2	107.6	109.3	109	92.7	97.2	94.5	93.3	97.3	98.2	100.8
A0A1U7ZJI2	Beta-adaptin-like protein OS=Nelumbo nucifera OX=4432 GN=LOC104595197 PE=3 SV=1	13	8	10	2	889	98.6	5.83	19.82	111.4	115.5	116.2	94.5	96.1	89.7	94.4	89.9	92.7	99.7
A0A1U8ABI8	3-phosphoshikimate 1-carboxyvinyltransferase OS=Nelumbo nucifera OX=4432 GN=LOC104602250 PE=3 SV=1	13	6	7	6	525	56.2	8.15	19.9	170.9	167.7	166.3	68.3	70.4	69	57.3	62.7	60.8	106.5
A0A1U7ZTY7	ubiquitin carboxyl-terminal hydrolase MINDY-1-like OS=Nelumbo nucifera OX=4432 GN=LOC104596216 PE=4 SV=1	14	7	8	7	700	77.2	4.72	17.94	102.4	106.6	106.7	100.9	97	99.1	94.1	97.7	97.1	98.5
A0A1U8ADG1	glycolipid transfer protein 1-like OS=Nelumbo nucifera OX=4432 GN=LOC104602825 PE=4 SV=1	36	6	10	3	202	22.5	6.21	25.5	121.7	122.4	111.3	87.1	95.1	96.1	84	92.8	83.6	105.9
A0A1U8BLF7	histone H1-like OS=Nelumbo nucifera OX=4432 GN=LOC104612416 PE=3 SV=1	30	8	15	5	263	27.4	10.71	24.12	98.1	94.3	97	97	95.4	102.6	107.7	107.3	106	94.6
A0A1U7Z7W3	60S ribosomal protein L35-like OS=Nelumbo nucifera OX=4432 GN=LOC104591419 PE=3 SV=1	42	7	14	2	123	14.4	11.28	41.45	101.9	99.9	104	93	98.3	93.7	102.9	105.6	103.1	97.6
A0A1U8AN24	zinc finger protein GIS2-like OS=Nelumbo nucifera OX=4432 GN=LOC104602034 PE=4 SV=1	34	6	8	3	244	27	8.76	22.09	93.9	88.1	89	107.1	94.3	104.1	115.3	108.8	101.7	97.7
A0A1U8ADV0	uncharacterized protein LOC104603378 OS=Nelumbo nucifera OX=4432 GN=LOC104603378 PE=3 SV=1	21	9	11	9	449	51.2	9.79	16.96	92.8	93.5	96.3	105.4	108.1	103.1	96.1	104.6	98.1	102.1
A0A1U7ZGC0	transmembrane emp24 domain-containing protein p24beta2 OS=Nelumbo nucifera OX=4432 GN=LOC104594268 PE=3 SV=1	41	7	10	5	212	24.4	6.27	24.8	104.7	100.6	99.5	106.4	103.4	101.9	90.3	98.1	93.9	101.1
A0A1U7YS35	Carbonic anhydrase OS=Nelumbo nucifera OX=4432 GN=LOC104587211 PE=3 SV=1	39	9	14	9	257	28.3	6	19.7	91.6	91.1	87.7	114.4	109.3	114.8	97.9	98	96.9	98.4
A0A1U8BCZ6	ATP sulfurylase 1, chloroplastic OS=Nelumbo nucifera OX=4432 GN=LOC104613237 PE=4 SV=1	24	11	13	11	467	52.6	8.75	24.65	154.1	154.7	155	71	72	70.5	71.5	70.5	73.9	106.9
A0A1U8Q601	4-hydroxy-tetrahydrodipicolinate reductase 1, chloroplastic-like isoform X1 OS=Nelumbo nucifera OX=4432 GN=LOC104600380 PE=4 SV=1	22	7	11	7	335	36.5	6.79	23.65	103.2	100.4	103.9	98.4	98.1	94.4	102.9	100.3	97	101.3
A0A1U8B0Z8	Acetolactate synthase OS=Nelumbo nucifera OX=4432 GN=LOC104609662 PE=3 SV=1	12	7	11	5	671	73.2	7.18	20.56	115.8	118.6	113.2	89.3	95	93.6	89	88.8	94	102.7
A0A1U7ZX98	very-long-chain enoyl-CoA reductase OS=Nelumbo nucifera OX=4432 GN=LOC104594555 PE=4 SV=1	22	6	9	6	310	36.5	9.66	23.14	99	99.9	96.1	100.7	98.1	96.7	105.3	104.8	101.7	97.7
A0A1U7ZSR3	protein DMR6-LIKE OXYGENASE 1-like OS=Nelumbo nucifera OX=4432 GN=LOC104595860 PE=3 SV=1	24	8	11	8	362	41.7	5.97	21.34	169.8	171.8	170.6	68.9	68.1	64.4	58.1	61.9	58.3	108
A0A1U7YPD5	aquaporin PIP1-2 OS=Nelumbo nucifera OX=4432 GN=LOC104586364 PE=3 SV=1	10	4	13	4	286	30.8	9.33	36.31	82	84.1	78.9	107.6	112.1	104.7	111.6	105.1	111.7	102.2
A0A1U8BIH7	ER membrane protein complex subunit 8/9 homolog OS=Nelumbo nucifera OX=4432 GN=LOC104611464 PE=4 SV=1	45	8	10	8	202	22.7	5.58	24.44	102.2	105.3	101.3	97	103.7	98.8	94.3	96.6	96.9	103.9
A0A1U8A3Z8	tetratricopeptide repeat protein 38 OS=Nelumbo nucifera OX=4432 GN=LOC104596486 PE=4 SV=1	21	8	10	8	473	54.4	6.33	27.01	97.2	95	92.9	102.8	100.1	98	105.4	102.1	107.5	99
A0A1U8ABD5	uncharacterized protein LOC104598854 OS=Nelumbo nucifera OX=4432 GN=LOC104598854 PE=4 SV=1	34	6	8	6	244	26.6	5.76	25.17	81.9	90.6	83.3	103.9	113	112.5	107.3	101.7	111.3	94.7
A0A1U7Z4F3	Transmembrane 9 superfamily member OS=Nelumbo nucifera OX=4432 GN=LOC104586624 PE=3 SV=1	15	9	11	5	636	73.1	8.37	22.15	150.6	146.1	145.9	79	84.6	78.3	66	72.5	70.1	106.8
A0A1U8AY47	uncharacterized protein At2g27730, mitochondrial-like OS=Nelumbo nucifera OX=4432 GN=LOC104607659 PE=4 SV=1	52	4	9	4	114	12.1	9.52	31.02	93.9	93.1	97.7	100.1	100.6	98	107	105.5	103.6	100.4
A0A1U8BAB5	aspartyl protease AED3-like OS=Nelumbo nucifera OX=4432 GN=LOC104611341 PE=3 SV=1	18	7	12	6	440	47.2	9.28	32.27	96.1	93	91	101	102	102.1	100.5	105.6	107.1	101.6
A0A1U8A6L7	14 kDa zinc-binding protein OS=Nelumbo nucifera OX=4432 GN=LOC104599674 PE=4 SV=1	22	3	6	3	196	21.4	9.76	19.61	104.2	105.7	111.3	96.6	97.9	97.8	92.8	101	94.9	97.9
A0A1U7ZNB3	dolichyl-diphosphooligosaccharide--protein glycosyltransferase subunit STT3B OS=Nelumbo nucifera OX=4432 GN=LOC104592411 PE=4 SV=1	14	9	12	9	735	82.7	8.7	24.13	104.2	99.3	103.9	95	97.3	91.4	104	103.6	102	99.3
A0A1U7Z1Q8	cytochrome b5 OS=Nelumbo nucifera OX=4432 GN=LOC104589383 PE=3 SV=1	52	5	9	3	135	14.8	5.27	21.05	163.1	154.1	160.9	73.4	71.6	72.3	66.6	73.5	62.4	102.1
A0A1U7ZNV0	thioredoxin-like protein AAED1, chloroplastic OS=Nelumbo nucifera OX=4432 GN=LOC104594725 PE=4 SV=1	28	8	11	8	261	28.1	8.62	31.12	84.8	89.1	89.7	100.1	98.8	100.3	119.3	110.5	111.8	95.6
A0A1U7Z5W5	Translation machinery-associated protein 22 OS=Nelumbo nucifera OX=4432 GN=LOC104586638 PE=3 SV=1	33	6	9	3	200	22	7.64	25.94	102.9	105.9	105.9	92.8	95.5	99.9	96.5	102.1	98.8	99.5
A0A1U7ZRZ1	acidic endochitinase-like OS=Nelumbo nucifera OX=4432 GN=LOC104593439 PE=3 SV=1	22	5	7	5	298	32.1	8.4	16.64	68.4	88.2	66.8	111.4	115.2	106.7	111.1	109.1	129.4	93.8
A0A1U7Z9L9	ATP-dependent 6-phosphofructokinase OS=Nelumbo nucifera OX=4432 GN=LOC104588249 PE=3 SV=1	15	8	11	1	547	60.1	7.91	26.22	112.4	103.5	103.5	105.2	95.7	87.8	105.7	89.1	96.4	100.9
A0A1U7ZAJ9	SH3 domain-containing protein 1-like OS=Nelumbo nucifera OX=4432 GN=LOC104588092 PE=4 SV=1	24	7	11	6	374	41.1	6.57	24.27	125.2	127.1	126.6	86.1	84.6	85.9	85.7	79.8	99.1	100
A0A1U8ARR4	ubiquitin-conjugating enzyme E2 variant 1A-like OS=Nelumbo nucifera OX=4432 GN=LOC104606733 PE=4 SV=1	35	7	11	4	159	18.2	5	27.2	120.3	134.8	123.8	90.9	87.9	86.4	76.2	86.6	88.2	104.9
A0A1U8B6F1	protein ACCUMULATION AND REPLICATION OF CHLOROPLASTS 6, chloroplastic OS=Nelumbo nucifera OX=4432 GN=LOC104607509 PE=4 SV=1	11	8	10	8	803	88.6	4.98	21.44	114.2	115.2	113.9	96.6	96.1	96.5	88	87.1	89.8	102.6
A0A1U7Z8T2	importin-4-like OS=Nelumbo nucifera OX=4432 GN=LOC104587531 PE=4 SV=1	9	9	10	3	1049	115.6	4.92	17.33	116.3	109.2	110.9	92.3	98.4	96.1	91.6	89	95.7	100.4
A0A1U8ATL7	KAT8 regulatory NSL complex subunit 3 OS=Nelumbo nucifera OX=4432 GN=LOC104603979 PE=4 SV=1	21	5	8	5	230	24.9	9.16	18.5	118	122.6	122.2	87.8	96.2	88.6	86	87.7	86.9	103.9
A0A1U7ZM42	probable transcriptional regulatory protein At2g25830 OS=Nelumbo nucifera OX=4432 GN=LOC104592093 PE=3 SV=1	21	5	9	5	312	34.9	5.58	23.1	108.2	105.9	111.6	96.9	94.2	99.2	91.8	93.6	93.8	104.9
A0A1U8A4N9	Eukaryotic translation initiation factor 3 subunit J OS=Nelumbo nucifera OX=4432 GN=LOC104599125 PE=3 SV=1	32	7	13	2	222	25.2	4.82	33.47	116.6	120.3	107.6	106.2	89.9	86.2	87.4	102.3	87.5	95.9
A0A1U8APQ7	Probable tRNA N6-adenosine threonylcarbamoyltransferase OS=Nelumbo nucifera OX=4432 GN=LOC104605208 PE=3 SV=1	22	5	7	5	356	39.1	5.97	18.39	98	102.6	104.8	110.5	98.3	108.1	91	92	93.9	100.7
A0A1U8ARB0	probable protein phosphatase 2C 60 isoform X1 OS=Nelumbo nucifera OX=4432 GN=LOC104603251 PE=3 SV=1	23	9	12	2	360	39.6	5.6	28.64	99.8	96.3	98	104.8	102.9	100	94	103.1	104.7	96.4
A0A1U7YM10	Flap endonuclease 1 OS=Nelumbo nucifera OX=4432 GN=LOC104585594 PE=3 SV=1	28	7	7	7	418	46.9	8.4	17.83	119.2	123.9	118.9	93.4	91.5	92.6	82.4	81.4	88.4	108.4
A0A1U8A6C5	26S proteasome non-ATPase regulatory subunit 7 homolog A-like OS=Nelumbo nucifera OX=4432 GN=LOC104601223 PE=4 SV=1	24	6	10	2	310	35	6.48	14.76	103	102.7	109.6	97.5	98.6	96.8	99.1	96.2	97.4	99.1
A0A1U7Z8J2	callose synthase 10 OS=Nelumbo nucifera OX=4432 GN=LOC104591590 PE=4 SV=1	4	7	11	5	1910	219.4	8.48	24.89	118.8	116.3	122.8	97.8	97.2	97.5	83.7	83.9	86.6	95.3
A0A1U8QAI4	mitochondrial Rho GTPase 1-like isoform X3 OS=Nelumbo nucifera OX=4432 GN=LOC104586729 PE=4 SV=1	15	8	8	4	504	56.2	5.94	19.48	101.5	102.1	101.6	102.9	107.5	96.3	95	92.5	88.9	111.5
A0A1U7Z5I6	vesicle-associated membrane protein 721-like OS=Nelumbo nucifera OX=4432 GN=LOC104586511 PE=3 SV=1	28	7	10	5	222	24.9	8.41	21.43	127.5	125.2	125.6	94.1	90.8	84.7	82	83.4	84.2	102.7
A0A1U8AKF2	probable signal peptidase complex subunit 2 OS=Nelumbo nucifera OX=4432 GN=LOC104601215 PE=4 SV=1	31	4	6	4	190	21.2	9.31	18.37	103.6	111	109.7	97.2	96.6	96.9	86.1	95.8	105.1	98
A0A1U8AFK0	polygalacturonase inhibitor-like OS=Nelumbo nucifera OX=4432 GN=LOC104603472 PE=4 SV=1	24	7	13	7	343	38	8.16	32.54	64.9	64.7	67.4	115.1	126.3	122.1	108.9	115.7	116.6	98.2
A0A1U7ZAH0	Cytochrome b-c1 complex subunit Rieske, mitochondrial OS=Nelumbo nucifera OX=4432 GN=LOC104592740 PE=4 SV=1	27	6	9	3	274	30	8.9	19.6	97.1	102.1	102.8	87.8	103.3	105.2	107.5	98.1	96	100.2
A0A1U8AA09	Glycylpeptide N-tetradecanoyltransferase OS=Nelumbo nucifera OX=4432 GN=LOC104600662 PE=3 SV=1	25	10	12	5	434	49.8	6.7	28.46	108.9	105.8	111.6	91.9	96.6	95.3	97.8	94.4	97.3	100.4
A0A1U8A2S3	50S ribosomal protein L5, chloroplastic OS=Nelumbo nucifera OX=4432 GN=LOC104600203 PE=3 SV=1	39	10	14	10	263	28.8	10.05	30.87	102.5	99.8	98.8	96.5	98.6	102.5	100.3	98.2	99.7	103.1
A0A1U8BHJ6	uncharacterized protein LOC104611177 OS=Nelumbo nucifera OX=4432 GN=LOC104611177 PE=4 SV=1	28	6	9	6	248	27.9	9.54	20.04	90.2	98.9	98.2	97.3	105.5	100.7	107.4	99.7	100.6	101.5
A0A1U8AMB8	peptidyl-prolyl cis-trans isomerase CYP40 OS=Nelumbo nucifera OX=4432 GN=LOC104605465 PE=4 SV=1	24	9	11	8	361	40.4	6.47	27.57	101.1	103.8	101.5	102.3	107.1	101.7	92.3	91.8	95.4	103
A0A1U7ZFP4	vacuolar protein sorting-associated protein 26A-like OS=Nelumbo nucifera OX=4432 GN=LOC104593537 PE=4 SV=1	23	6	11	1	301	35.4	7.36	27.21	101.5	101.1	99	101.5	95.8	103.5	102.4	97.7	99.2	98.2
A0A1U7ZF63	prefoldin subunit 1 OS=Nelumbo nucifera OX=4432 GN=LOC104589474 PE=4 SV=1	52	7	9	7	129	14.9	5.71	21.51	93.6	95.2	94.1	99.8	94.7	97.3	111.4	109.8	109.7	94.4
A0A1U7Z6B0	Nucleoside diphosphate kinase OS=Nelumbo nucifera OX=4432 GN=LOC104591622 PE=3 SV=1	29	7	11	7	228	25.5	9.07	27.88	94.8	95.7	95.4	102	104.5	98.7	102.5	105.6	100.7	100.2
A0A1U7ZJ09	exocyst complex component SEC8 OS=Nelumbo nucifera OX=4432 GN=LOC104590693 PE=4 SV=1	9	8	9	8	1078	119.6	5.59	16.57	118.6	112.3	118.7	97	93.7	95.1	84.7	84.5	93.2	102.3
A0A1U7YZC7	microsomal glutathione S-transferase 3-like OS=Nelumbo nucifera OX=4432 GN=LOC104589396 PE=4 SV=1	13	3	11	3	149	16.6	9.51	16.78	61.2	62.2	63.9	111.9	113.7	108.3	128.4	127	126.2	97.2
A0A1U7ZUC5	acyl-CoA-binding protein OS=Nelumbo nucifera OX=4432 GN=LOC104596348 PE=4 SV=1	47	4	9	2	90	10.2	5.22	25.11	109.4	105.6	109.7	98.6	92.4	95.8	94.5	95.5	96.5	101.8
A0A1U7ZSW2	TBCC domain-containing protein 1-like OS=Nelumbo nucifera OX=4432 GN=LOC104597514 PE=4 SV=1	15	7	10	6	575	63.2	5.3	22.94	101.3	101.9	99.4	105	102.2	107.1	92.3	93.7	94.3	102.8
A0A1U8AW28	uncharacterized protein LOC104604693 OS=Nelumbo nucifera OX=4432 GN=LOC104604693 PE=4 SV=1	14	2	4	2	275	30.3	9.7	17.91	86.8	83.3	90.3	95.1	104.9	98.1	113.7	114.8	108.3	104.6
A0A1U8AE05	DNA-damage-repair/toleration protein DRT100-like OS=Nelumbo nucifera OX=4432 GN=LOC104603446 PE=4 SV=1	29	8	11	6	364	39.2	6.76	25.59	104.4	108.3	99.2	99.1	99.2	103.1	91.6	97.2	93	104.9
A0A1U8AXU5	Peptidylprolyl isomerase OS=Nelumbo nucifera OX=4432 GN=LOC104608595 PE=4 SV=1	28	3	12	3	120	12.9	7.81	30.97	116.4	112	119.6	88.3	89.4	87.3	95.6	97.6	93.2	100.6
A0A1U7ZFE8	protein FAR1-RELATED SEQUENCE 3 OS=Nelumbo nucifera OX=4432 GN=LOC104593470 PE=4 SV=1	9	8	11	8	887	100.9	6.58	22.32	112.5	113.3	111.2	89.5	98	95.6	91.6	92.3	96.4	99.7
A0A1U8A8K1	agmatine deiminase OS=Nelumbo nucifera OX=4432 GN=LOC104597818 PE=3 SV=1	23	6	8	6	378	42.2	4.96	14.81	93.4	99.6	90.7	103.1	106.9	108.6	97.9	100.3	91	108.6
A0A1U7ZPF9	40S ribosomal protein S24 OS=Nelumbo nucifera OX=4432 GN=LOC104596531 PE=3 SV=1	26	4	10	2	138	15.8	10.74	30.73	107.1	104.6	110.5	94.9	90.2	89.7	103	101.4	99.4	99.2
A0A1U8BE81	Carboxypeptidase OS=Nelumbo nucifera OX=4432 GN=LOC104609936 PE=3 SV=1	18	9	12	9	454	50.5	6.71	22.62	98.3	95.3	95.7	98	102.5	103.3	100.9	102.5	103.6	99.9
A0A1U8B4P4	Trafficking protein particle complex subunit OS=Nelumbo nucifera OX=4432 GN=LOC104609685 PE=3 SV=1	32	6	7	2	186	20.9	4.51	19.73	110.1	116.5	105.2	100	95.9	116.7	89.5	86.5	73.1	106.4
A0A1U7Z7S7	probable nucleoredoxin 1 OS=Nelumbo nucifera OX=4432 GN=LOC104587227 PE=4 SV=1	15	7	9	7	570	63.9	4.92	23.76	96.4	98.6	99.2	97	98.4	102.4	100	96.2	109.8	102.1
A0A1U8QBJ7	phosphoacetylglucosamine mutase OS=Nelumbo nucifera OX=4432 GN=LOC104610445 PE=4 SV=1	19	8	9	8	400	43.2	6.29	24.4	102.4	103.2	105.6	104	105.8	107.7	89	93	89.9	99.3
A0A1U7ZHC7	thioredoxin-like protein CXXS1 OS=Nelumbo nucifera OX=4432 GN=LOC104590166 PE=4 SV=1	42	5	7	5	125	13.9	5.31	24.65	66.5	66.4	65	107.6	108.4	108.3	125.9	125.4	126.2	100.3
A0A1U8ATP9	splicing factor SF3a60 homolog OS=Nelumbo nucifera OX=4432 GN=LOC104604006 PE=4 SV=1	19	8	8	8	509	60	5.22	17.76	108.4	108.8	104.5	99.2	100.4	102.9	90.8	94.5	90.9	99.5
A0A1U7YTA5	Isocitrate lyase OS=Nelumbo nucifera OX=4432 GN=LOC104585660 PE=3 SV=1	22	11	12	11	581	65.4	7.2	15.97	158.4	153.7	159.9	72.1	78	77.5	61.7	67.4	66	105.4
A0A1U8BJJ3	cysteine--tRNA ligase 2, cytoplasmic OS=Nelumbo nucifera OX=4432 GN=LOC104611547 PE=3 SV=1	17	9	12	9	515	58.9	6.46	26.3	104.1	106.4	106.4	97.2	97.8	100.2	92.6	93.9	97.2	104.2
A0A1U7ZFV0	Mitochondrial pyruvate carrier OS=Nelumbo nucifera OX=4432 GN=LOC104594135 PE=3 SV=1	31	3	5	3	108	12.1	9.35	14.94	94.1	98.1	108.2	103.4	103.3	100.3	93.9	100.1	92.2	106.3
A0A1U8AB93	acetate/butyrate--CoA ligase AAE7, peroxisomal OS=Nelumbo nucifera OX=4432 GN=LOC104598812 PE=4 SV=1	16	8	13	3	569	62.2	8.15	24.29	73	78.7	75.7	115.8	119.8	113.1	113.2	107.4	104.1	99.3
A0A1U7ZTG1	Homoserine dehydrogenase OS=Nelumbo nucifera OX=4432 GN=LOC104593475 PE=3 SV=1	28	11	11	11	377	40.1	6.02	23.35	109.7	106.2	103.6	96.5	101.4	96.9	100	90.9	93.8	101
A0A1U8B8A2	Thioredoxin OS=Nelumbo nucifera OX=4432 GN=LOC104608054 PE=3 SV=1	58	8	13	8	136	15	6.18	26.96	105.1	105.7	111	97.7	97.6	95.6	96.1	94.3	97.2	99.7
A0A1U7Z5I1	ATP-citrate synthase alpha chain protein 1-like OS=Nelumbo nucifera OX=4432 GN=LOC104591421 PE=4 SV=1	22	7	9	1	423	46.6	6.8	19.58	120.9	137	116.6	80.7	70.8	99	103.8	66	90.5	114.7
A0A1U8BGJ5	2-methyl-6-phytyl-1,4-hydroquinone methyltransferase, chloroplastic OS=Nelumbo nucifera OX=4432 GN=LOC104613253 PE=3 SV=1	19	6	9	6	340	38.5	9.07	26.82	103.8	103.9	108	99.5	103.1	99.8	89.9	94.4	96.9	100.7
A0A1U7ZPF3	uncharacterized protein LOC104592350 OS=Nelumbo nucifera OX=4432 GN=LOC104592350 PE=4 SV=1	22	7	14	4	369	40.2	6.43	36.89	88.2	84.7	85.4	109.7	109.5	113.8	101.7	104.7	102.7	99.5
A0A1U8BAT3	uncharacterized protein LOC104609062 OS=Nelumbo nucifera OX=4432 GN=LOC104609062 PE=4 SV=1	21	6	11	6	352	39.4	9.41	24.33	88.9	101.4	87.9	97.4	105.8	103.2	107.7	103.7	104.2	99.8
A0A1U7Z2U7	uncharacterized protein LOC104589729 isoform X2 OS=Nelumbo nucifera OX=4432 GN=LOC104589729 PE=4 SV=1	49	6	7	5	143	15.3	7.77	17	105.5	98.7	110.2	96.3	97.2	100.1	97.1	97	95.8	102.1
A0A1U8BDN3	multiprotein-bridging factor 1a OS=Nelumbo nucifera OX=4432 GN=LOC104609767 PE=4 SV=1	36	6	11	4	142	15.7	9.86	32.95	121.7	124.5	119.7	90.7	91.3	87.5	89.1	86.5	84.1	104.9
A0A1U8A914	Secretory carrier-associated membrane protein OS=Nelumbo nucifera OX=4432 GN=LOC104600396 PE=3 SV=1	19	5	7	5	268	30.6	8.32	17.19	98.4	97.2	95.1	101.3	103.2	101.6	103.6	103.9	96.7	99
A0A1U8AK66	oleosin 1-like OS=Nelumbo nucifera OX=4432 GN=LOC104601149 PE=4 SV=1	29	5	16	5	165	17.7	9.51	39.48	80.8	81.9	80.4	108.9	110.4	109.1	112.3	112.4	106.9	96.9
A0A1U8AFJ2	protein MOTHER of FT and TFL1 OS=Nelumbo nucifera OX=4432 GN=LOC104599710 PE=4 SV=1	25	3	8	3	176	19.4	9	21.57	118.1	122.8	123.2	95.4	90.9	87.8	86.5	87.3	83.6	104.5
A0A1U8ABN5	monocopper oxidase-like protein SKU5 OS=Nelumbo nucifera OX=4432 GN=LOC104602295 PE=4 SV=1	12	5	8	3	595	67	7.33	15.96	101.3	97.2	103.2	103.1	101.4	97.8	99.4	100.3	103.2	93
A0A1U7ZBZ6	Protein-L-isoaspartate O-methyltransferase OS=Nelumbo nucifera OX=4432 GN=LOC104591547 PE=3 SV=1	31	8	9	8	302	33	8.32	20.19	77.7	75.1	78.1	110.3	106.8	106.4	119.1	115.4	113.7	97.3
A0A1U8B7R2	glycerol-3-phosphate 2-O-acyltransferase 4-like OS=Nelumbo nucifera OX=4432 GN=LOC104610618 PE=4 SV=1	19	9	10	9	500	55.3	9.38	19.86	125.3	120.7	121.5	91.8	92.6	89.2	83.2	82.8	90.9	102
A0A1U7ZST6	uncharacterized protein LOC104593650 OS=Nelumbo nucifera OX=4432 GN=LOC104593650 PE=4 SV=1	10	8	9	8	740	83.7	6.54	21.97	141.1	145.1	142.2	80.8	80.7	85.1	74.6	69.6	74.3	106.7
A0A1U8AIK8	17.1 kDa class II heat shock protein-like OS=Nelumbo nucifera OX=4432 GN=LOC104600625 PE=3 SV=1	30	4	13	2	158	17.7	5.48	30.52	99.7	104.6	98.4	95	100.6	113	101.6	91.6	97.3	98.1
A0A1U8BAM0	Phosphoribulokinase OS=Nelumbo nucifera OX=4432 GN=LOC104611432 PE=3 SV=1	19	7	9	7	407	45.2	6.47	23.37	105.6	106.3	108.9	99.7	102.6	102	86.8	93.9	93.1	101.1
A0A1U7ZWU4	DNA damage-inducible protein 1 OS=Nelumbo nucifera OX=4432 GN=LOC104594387 PE=4 SV=1	23	7	9	7	409	45.1	5.08	21.01	111.7	116.9	114.5	95.6	101.4	93.5	83.2	93.1	89.4	100.6
A0A1U7Z8N3	3-oxoacyl-[acyl-carrier-protein] synthase 3 A, chloroplastic-like isoform X1 OS=Nelumbo nucifera OX=4432 GN=LOC104592246 PE=3 SV=1	16	5	7	2	404	42.9	6.77	16.19	110.6	116.6	98.6	103.1	94	99.3	89.4	81.2	102.3	105
A0A1U8B668	Peptidylprolyl isomerase OS=Nelumbo nucifera OX=4432 GN=LOC104611203 PE=4 SV=1	14	7	8	7	528	57.6	5.22	18.66	100.6	102.7	98.8	98.1	97	103.8	92.4	99.3	106.6	100.7
A0A1U8A1F4	remorin-like OS=Nelumbo nucifera OX=4432 GN=LOC104596113 PE=4 SV=1	42	8	10	8	186	20.8	5.67	26.2	65.9	64.8	66.7	112.5	116.6	110.2	124.8	123	122	93.6
A0A1U7ZHY9	protein SGT1 homolog A OS=Nelumbo nucifera OX=4432 GN=LOC104590354 PE=4 SV=1	23	7	7	5	366	40.8	5.27	17.76	130.2	124.1	128.6	91.6	85.5	87.6	85.7	80	79.5	107.2
A0A1U8B6U0	beta-fructofuranosidase, insoluble isoenzyme 1-like OS=Nelumbo nucifera OX=4432 GN=LOC104607641 PE=3 SV=1	15	8	10	8	573	64.5	8.63	24	103.8	108	107	102.2	101.7	98.9	91.3	91	92.3	103.8
A0A1U7ZKS0	bifunctional monothiol glutaredoxin-S16, chloroplastic OS=Nelumbo nucifera OX=4432 GN=LOC104594920 PE=4 SV=1	20	6	9	6	298	32.9	8.7	21.41	93.5	96.8	93.4	98.1	104.6	101.8	104.9	103.9	103.8	99.2
A0A1U7ZZ71	beta-ureidopropionase OS=Nelumbo nucifera OX=4432 GN=LOC104595495 PE=4 SV=1	14	4	5	4	416	46.8	6.6	18.09	144.9	140.8	140.6	82.2	79.1	77.1	74.9	79.7	81.1	99.6
A0A1U8A6J4	probably inactive leucine-rich repeat receptor-like protein kinase IMK2 OS=Nelumbo nucifera OX=4432 GN=LOC104597259 PE=4 SV=1	10	8	10	8	866	94.1	8.47	21.5	100.5	106.3	102	94.1	98.2	100.6	101	96.1	97.9	103.4
A0A1U8ALR2	phosphoprotein ECPP44-like OS=Nelumbo nucifera OX=4432 GN=LOC104604356 PE=3 SV=1	29	6	8	6	236	27	5.1	20.7	97.7	91.1	92.5	110.8	101.6	103	100.9	99.4	104.4	98.6
A0A1U8A9B5	3-oxoacyl-[acyl-carrier-protein] synthase II, chloroplastic-like OS=Nelumbo nucifera OX=4432 GN=LOC104600487 PE=3 SV=1	14	6	7	3	565	60.5	8.6	16.5	112.8	113.8	106.1	96.7	99.6	96.1	88.9	91.2	93.1	101.8
A0A1U8A5P3	oxysterol-binding protein-related protein 3A-like isoform X1 OS=Nelumbo nucifera OX=4432 GN=LOC104601041 PE=3 SV=1	22	7	11	6	456	52	5.24	19.46	110.5	120.8	114.8	91.7	90.8	89.1	96.2	93.2	90.8	102
A0A1U8B779	uncharacterized protein LOC104607784 isoform X1 OS=Nelumbo nucifera OX=4432 GN=LOC104607784 PE=3 SV=1	26	6	9	6	303	31.8	8.54	25.39	100.1	113.4	99.2	105	101.8	101.4	92.7	91.5	92.9	102
A0A1U8B5H1	4-hydroxy-tetrahydrodipicolinate synthase, chloroplastic isoform X1 OS=Nelumbo nucifera OX=4432 GN=LOC104610990 PE=4 SV=1	19	7	11	6	365	40.2	7.05	31.23	87.6	88.2	90.8	113.5	109.8	113.5	100.8	98.6	96.6	100.6
A0A1U8ACN8	(DL)-glycerol-3-phosphatase 2 OS=Nelumbo nucifera OX=4432 GN=LOC104599191 PE=4 SV=1	23	5	6	5	241	26.7	6.04	13.25	114.1	109.6	113.2	94.3	92.8	91.6	90.4	96.7	95	102.3
A0A1U7Z7X3	Isocitrate dehydrogenase [NADP] OS=Nelumbo nucifera OX=4432 GN=LOC104591424 PE=3 SV=1	17	7	9	5	478	53.6	7.93	21.98	106.3	113.2	116.6	94.5	88.1	91	98	96	95.1	101.1
A0A1U7ZX96	oxysterol-binding protein-related protein 3C-like OS=Nelumbo nucifera OX=4432 GN=LOC104597169 PE=3 SV=1	13	5	8	4	456	51.8	5.49	15	119	111.4	115.1	91.2	95	90.8	91.7	94	87.8	104
A0A1U7ZEU8	Nascent polypeptide-associated complex subunit beta OS=Nelumbo nucifera OX=4432 GN=LOC104593871 PE=3 SV=1	54	5	8	1	164	17.9	8.37	23.37
A0A1U8BDW0	histone H1-like OS=Nelumbo nucifera OX=4432 GN=LOC104612418 PE=3 SV=1	28	8	13	5	263	27.2	10.67	23.86	100.6	100.3	98.6	94.6	94.4	94	105.3	103.3	110.3	98.7
A0A1U7ZCT7	Ornithine aminotransferase OS=Nelumbo nucifera OX=4432 GN=LOC104588772 PE=3 SV=1	22	5	9	5	282	31.6	7.4	16.12	86.7	86.5	84.7	109.4	108.5	105.1	107.1	103.9	111.4	96.8
A0A1U8ANJ7	alanine--glyoxylate aminotransferase 2 homolog 1, mitochondrial OS=Nelumbo nucifera OX=4432 GN=LOC104605885 PE=3 SV=1	18	8	9	8	469	51.2	8.41	23.88	101.6	95.1	94.9	103.2	104.2	101	96.8	94.9	106.8	101.5
A0A1U7YML4	Acyl carrier protein OS=Nelumbo nucifera OX=4432 GN=LOC104585794 PE=3 SV=1	12	2	6	2	138	14.8	5.55	20.72	125.1	116.1	122.7	95.2	97.4	102.3	81.2	81.5	78.9	99.7
A0A1U8ATU8	superoxide dismutase [Fe], chloroplastic isoform X1 OS=Nelumbo nucifera OX=4432 GN=LOC104606404 PE=4 SV=1	16	5	8	5	303	34.8	5.16	22.08	93.5	98.8	92.5	94.8	102.7	103.5	101.8	104.3	105.9	102.2
A0A1U8APV3	nucleolin-like OS=Nelumbo nucifera OX=4432 GN=LOC104606384 PE=4 SV=1	13	9	11	6	784	87.3	5.24	23.08	88	89.4	82.3	92.6	92.6	94.3	122	118.4	124.1	96.3
A0A1U8B9K7	Methionine aminopeptidase 2 OS=Nelumbo nucifera OX=4432 GN=LOC104612217 PE=3 SV=1	19	7	8	7	468	51.8	6.48	20.56	111.6	114.3	106.9	102.5	89.1	82.2	82.6	80.1	124.1	106.5
A0A1U8AST2	uncharacterized protein LOC104603525 OS=Nelumbo nucifera OX=4432 GN=LOC104603525 PE=3 SV=1	17	9	11	4	655	73.1	6.98	23.26	93.1	96	91.7	101	100.6	109.3	108.3	103.1	96	100.8
A0A1U7Z297	60S acidic ribosomal protein P2-2-like OS=Nelumbo nucifera OX=4432 GN=LOC104585963 PE=3 SV=1	30	5	13	3	116	11.7	4.54	30.33	109.9	114.7	110.2	98.1	95.6	104	83.7	83.9	92.7	107.3
A0A1U7YN36	uncharacterized protein At2g34460, chloroplastic isoform X1 OS=Nelumbo nucifera OX=4432 GN=LOC104585946 PE=4 SV=1	25	6	9	3	251	27.4	6.13	20.38	71.9	74.7	68.1	114.7	109	111.3	119.8	119.7	113.9	96.9
A0A1U8BFZ3	Ubiquitin carboxyl-terminal hydrolase OS=Nelumbo nucifera OX=4432 GN=LOC104610496 PE=3 SV=1	41	7	9	7	240	26.4	4.69	15.54	92.3	92.9	94.6	102	103.3	110.6	99.6	100.5	98.7	105.5
C0KH22	Starch synthase, chloroplastic/amyloplastic OS=Nelumbo nucifera OX=4432 GN=Waxy PE=3 SV=1	10	5	9	2	615	67.3	8.34	24.99	72.3	81.9	67.5	114	121.1	131.1	104.7	103.6	97	106.9
A0A1U7ZBS2	splicing factor 3B subunit 2-like OS=Nelumbo nucifera OX=4432 GN=LOC104588886 PE=4 SV=1	20	8	10	8	581	66.6	5.38	14.85	100.5	100.5	99.9	100.7	103.5	103	100.3	96.5	95.9	99.2
A0A1U8B0P9	wall-associated receptor kinase-like 18 OS=Nelumbo nucifera OX=4432 GN=LOC104606066 PE=4 SV=1	26	6	7	6	339	38.7	5.31	12.48	95.2	89.6	98.7	104.2	103.3	96.7	106.4	107.8	105.5	92.4
A0A1U7ZUZ6	callose synthase 9 OS=Nelumbo nucifera OX=4432 GN=LOC104597558 PE=4 SV=1	4	7	10	5	1907	219	8.18	21.82	118.5	121	115.8	92.5	96.5	88.2	77.9	91	93.6	105
A0A1U7ZAR5	Beta-adaptin-like protein OS=Nelumbo nucifera OX=4432 GN=LOC104592200 PE=3 SV=1	16	7	8	1	600	67.1	5.58	17.99	143.1	148.9	146.5	71.9	74.9	72.7	86.1	80.3	61.6	114.1
A0A1U7Z6N4	Ribulose-phosphate 3-epimerase OS=Nelumbo nucifera OX=4432 GN=LOC104591689 PE=3 SV=1	21	3	6	3	224	24.3	5.47	18.46	86.6	85.4	89.8	106.7	106.8	109.5	107.6	109.7	103.1	94.7
A0A1U8A4Q6	WD-40 repeat-containing protein MSI4 OS=Nelumbo nucifera OX=4432 GN=LOC104600719 PE=4 SV=1	19	6	7	2	465	51.2	6.44	16.97	130.2	131	130.1	80.4	81.3	84.4	70.9	92.1	90.6	109
A0A1U8AN66	importin-4-like isoform X1 OS=Nelumbo nucifera OX=4432 GN=LOC104605771 PE=4 SV=1	8	8	9	2	1048	115.3	5.02	17.18	101.5	89.4	87.2	102	101.3	97.6	107.5	102.4	112.2	98.8
A0A1U7ZIW4	V-type proton ATPase proteolipid subunit OS=Nelumbo nucifera OX=4432 GN=LOC104590658 PE=3 SV=1	11	1	6	1	165	16.6	8.46	13.69	111.3	109.7	106.9	96.6	102.7	96.6	94.7	94.3	88.2	98.8
A0A1U8ANC8	ultraviolet-B receptor UVR8-like isoform X1 OS=Nelumbo nucifera OX=4432 GN=LOC104605823 PE=4 SV=1	17	6	8	2	448	48.4	6.35	22.02	120.5	119.4	119.5	86.8	100.4	101.6	83.3	83.8	79	105.7
A0A1U8APW8	probable calcium-binding protein CML49 OS=Nelumbo nucifera OX=4432 GN=LOC104606260 PE=4 SV=1	19	5	12	5	278	30	6.9	26.55	78.6	84.3	80.4	111.6	117.3	115.9	101.1	105.1	105.8	100
A0A1U8AQF6	uncharacterized protein LOC104606412 OS=Nelumbo nucifera OX=4432 GN=LOC104606412 PE=3 SV=1	42	5	10	5	135	14.8	9.23	22.39	110.3	112.1	109.3	95.8	100.1	100.9	90.7	84.7	98	98.2
A0A1U8A1H4	membrane steroid-binding protein 2-like OS=Nelumbo nucifera OX=4432 GN=LOC104596132 PE=3 SV=1	27	5	9	4	220	23.8	4.83	32.86	96.8	97.5	91.3	110.6	100.1	108.7	92.2	104.1	98.5	100.1
A0A1U8Q616	unconventional prefoldin RPB5 interactor 1 isoform X1 OS=Nelumbo nucifera OX=4432 GN=LOC104598292 PE=4 SV=1	22	8	9	8	426	47.4	5.58	17.74	110.5	109.7	106.6	100.6	97.5	93.8	90.3	89.8	97.1	104.1
D3WC83	50S ribosomal protein L14, chloroplastic OS=Nelumbo nucifera OX=4432 GN=rpl14 PE=3 SV=1	45	5	9	5	122	13.6	8.94	19.08	94.7	94.9	97.8	104.4	106.1	113.3	96.6	98.3	97	96.9
A0A1U8AZY7	30S ribosomal protein S20, chloroplastic OS=Nelumbo nucifera OX=4432 GN=LOC104608166 PE=3 SV=1	19	4	10	4	182	20.4	10.56	26.47	94.8	97.9	95.5	100.6	100.7	104.3	104.8	98	102.2	101.1
A0A1U7YXA3	monodehydroascorbate reductase-like OS=Nelumbo nucifera OX=4432 GN=LOC104588006 PE=4 SV=1	21	8	11	1	434	47.3	6.16	25.77
A0A1U8AJM2	Small nuclear ribonucleoprotein Sm D3 OS=Nelumbo nucifera OX=4432 GN=LOC104603743 PE=3 SV=1	48	5	10	2	132	14.4	10.7	19.76	96.7	97.9	99.6	101.9	100.9	102.6	100.3	102.3	97.8	100
A0A1U7YRM9	ATP-dependent zinc metalloprotease FTSH, chloroplastic OS=Nelumbo nucifera OX=4432 GN=LOC104587097 PE=3 SV=1	15	9	9	9	720	77.1	7.12	15.15	99.2	100.7	98.6	104.4	108.8	107.1	89.3	96.3	95.4	100.2
A0A1U8B1L9	(S)-ureidoglycine aminohydrolase OS=Nelumbo nucifera OX=4432 GN=LOC104606373 PE=4 SV=1	23	4	5	4	302	34.2	6.6	15.88	97	105.9	87.6	98.5	106.2	101.8	96.5	105.4	100.3	100.9
D3WC67	Photosystem II protein D1 OS=Nelumbo nucifera OX=4432 GN=psbA PE=3 SV=1	14	4	8	4	353	38.9	5.25	23.23	134.2	133.1	127.8	80.5	81.3	82.8	83.1	84.6	90.6	102
A0A1U7Z2F6	Small ubiquitin-related modifier OS=Nelumbo nucifera OX=4432 GN=LOC104586016 PE=3 SV=1	35	4	8	4	100	11.1	5.1	22.99	102.2	99.3	101.8	96.1	100.3	95.7	100.1	101.4	103.2	99.8
A0A1U8AR65	protein ASPARTIC PROTEASE IN GUARD CELL 1 OS=Nelumbo nucifera OX=4432 GN=LOC104603014 PE=3 SV=1	20	7	8	7	494	52.4	5.38	18.96	119.7	118.3	112.3	92.1	87.1	94.4	95.1	91.2	86.2	103.8
A0A1U8A213	dihydrolipoyllysine-residue succinyltransferase component of 2-oxoglutarate dehydrogenase complex 2, mitochondrial-like OS=Nelumbo nucifera OX=4432 GN=LOC104598431 PE=4 SV=1	18	8	11	4	468	50.9	9.1	20.97	91.4	92.2	92.1	108.8	101.1	108.7	106.3	98	101	100.4
A0A1U8A5A6	ATP-dependent Clp protease proteolytic subunit OS=Nelumbo nucifera OX=4432 GN=LOC104596866 PE=3 SV=1	27	5	6	5	315	34.7	8.78	19.84	94.3	92.8	88.2	99.5	102.4	100.2	107.8	106.7	104.8	103.2
[truncated: 3,479 more rows]
